# Supplementary material for: The Venus flytrap trigger hair–specific potassium channel KDM1 can reestablish the K+ gradient required for hapto-electric signaling
Source: PLoS Biol. 2020 Dec 9;18(12):e3000964. doi: 10.1371/journal.pbio.3000964 (PMC7725304; doi:10.1371/journal.pbio.3000964)
Supplement: S2 Data — Expression values (FPKM) of all the 21,135 genes in root, flower, petiole, trap, rim, glands, and trigger hair, as well as pairwise differential expression log2FC values of each comparison (trigger hair vs. each of all the other tissues) that pass a threshold of BH p-adjusted value < 0.001 are shown. The Shannon entropy calculated Hgene-value, and Qgene|hair-values for the trigger hair is also shown. All the genes are annotated according to the Mercator 3.6 annotation tool including A. thaliana homologs and gene names together with their description. All the transcripts have been blasted against the Aramemnon plant membrane protein database; therefore, transportome members have been annotated accordingly. Bona fide trigger hair–specific genes identified by a combination of both methods (Shannon entropy together with the differential expression analysis—see Materials and methods section) are marked in red and ordered by Qgene|hair-value. An additional FPKM > 20 filter for the trigger hair expression level shows only the highly expressed genes that are also trigger hair specific. BH, Benjamini–Hochberg; FPKM, Fragments Per Kilobase of transcript per Million mapped reads; NA, not assigned. (XLSX) [file pbio.3000964.s018.xlsx]

## Sheet: S2_Data
DmID	GenesName	GenesShortDescription	MercatorShortDescription	AtID	MercatorLongDescription	Transportome_Aramemnon_annotation	Root_FPKM	Flower_FPKM	Petiole_FPKM	Trap_FPKM	Rim_FPKM	Glands_FPKM	Hair_FPKM	log2fc_Hair_vs_Flower	log2fc_Hair_vs_Glands	log2fc_Hair_vs_Petiole	log2fc_Hair_vs_Rim	log2fc_Hair_vs_Root	log2fc_Hair_vs_Trap	Shannon_H_Hair	Shannon_Q_Hair	highly_expressed_in_the_TH_and_highly_specific	Notes
Dm_00008922-RA		GDSL-like Lipase/Acylhydrolase superfamily protein	misc.GDSL-motif lipase	AT3G16370	(at3g16370 : 419.0) GDSL-like Lipase/Acylhydrolase superfamily protein; FUNCTIONS IN: hydrolase activity, acting on ester bonds, carboxylesterase activity; INVOLVED IN: lipid metabolic process; LOCATED IN: apoplast; EXPRESSED IN: 22 plant structures; EXPRESSED DURING: 14 growth stages; CONTAINS InterPro DOMAIN/s: Lipase, GDSL (InterPro:IPR001087); BEST Arabidopsis thaliana protein match is: GDSL-…	NA	0.65983	0.435182	0.0253694	0.508028	1.11122	1.96848	65.3783	7.23335	5.05497	11.8341	5.87987	6.62003	6.98422	0.307145	0.373553	yes
Dm_00017323-RA	SAG12	senescence-associated gene 12	protein.degradation.cysteine protease	AT5G45890	(loc_os04g13090.1 : 350.0) no description available & (at5g45890 : 310.0) Senescence-associated gene 12 (SAG12) encoding a cysteine protease influenced by cytokinin, auxin, and sugars.Localized to special vacuole found during senescence called senescence associated vacuoles which are different from central vacuole in the tonoplast composition and pH.; senescence-associated gene 12 (SAG12); CONTAI…	NA	0.0411349	0.0257994	0.575575	1.508	1.32	0.0354558	20.5402	9.65593	9.09117	5.15677	3.96128	8.76689	3.76592	0.688793	0.891213	yes	upon insect or coronatine treatment SAG12 represents a major marker enzyme for digestion, therefore when doing the analysis including stimulated trap data, this gene is no longer trigger hair specific
Dm_00000680-RA	SAG12	senescence-associated gene 12	protein.degradation.cysteine protease	AT5G45890	(loc_os04g13090.1 : 391.0) no description available & (at5g45890 : 366.0) Senescence-associated gene 12 (SAG12) encoding a cysteine protease influenced by cytokinin, auxin, and sugars.Localized to special vacuole found during senescence called senescence associated vacuoles which are different from central vacuole in the tonoplast composition and pH.; senescence-associated gene 12 (SAG12); CONTAI…	NA	0.541448	2.93669	0	0.192068	16.9053	0.326243	89.1993	4.92484	8.10151	13.9166	2.39984	7.34531	8.83437	0.794421	1.08419	yes	upon insect or coronatine treatment SAG12 represents a major marker enzyme for digestion, therefore when doing the analysis including stimulated trap data, this gene is no longer trigger hair specific
Dm_00009130-RA	MSL10	mechanosensitive channel of small conductance-like 10	signalling.unspecified, RNA.regulation of transcription.putative transcription regulator	AT5G12080	(at5g12080 : 630.0) mechanosensitive channel of small conductance-like 10 (MSL10); FUNCTIONS IN: mechanically-gated ion channel activity; INVOLVED IN: detection of mechanical stimulus; LOCATED IN: plasma membrane, membrane; EXPRESSED IN: 26 plant structures; EXPRESSED DURING: 13 growth stages; CONTAINS InterPro DOMAIN/s: Membrane protein, At2g17000, predicted (InterPro:IPR016688), Like-Sm ribonuc…	Plant permeome.channels.MscS family.MSL4+-like mechanosensitive ion channel..	2.08943	0.516573	0.20924	1.51292	0.439765	1.41132	26.6956	5.69356	4.24726	7.06478	5.92769	3.67134	4.1305	0.876856	1.12516	yes
Dm_00004067-RA	KAT1	1	transport.potassium	AT5G46240	(at5g46240 : 701.0) Encodes a potassium channel protein (KAT1). ABA triggers KAT1 endocytosis both in epidermal cells as well as guard cells. Upon removal of ABA, KAT1 is recycled back to the plasma membrane. KAT1 is localized within 0.5Ã±0.6 &#956;m diameter microdomains at the plasma membrane surface. KAT1 belongs to the Shaker family K+ channel. This family includes five groups based on phylog…	Plant permeome.channels.VIC superfamily.Plant-VG voltage-gated potassium cation channel..	0.85674	5.06488	6.1932	14.2236	7.99538	2.67849	122.118	4.59145	5.51257	4.30122	3.93306	7.15629	3.10064	1.31261	1.69718	yes
Dm_00012748-RA	MLO1	Seven transmembrane MLO family protein	stress.biotic.signalling.MLO-like	AT4G02600	(at4g02600 : 565.0) A member of a large family of seven-transmembrane domain proteins specific to plants, homologs of the barley mildew resistance locus o (MLO) protein. The Arabidopsis genome contains 15 genes encoding MLO proteins, with localization in plasma membrane. Phylogenetic analysis revealed four clades of closely-related AtMLO genes. ATMLO1 belongs to the clade II, with ATMLO13 and ATM…	NA	2.31843	4.82477	0.365532	284.167	3.47189	110.023	870.96	7.49398	2.98511	11.1946	7.96653	8.5251	1.61598	1.2336	1.78429	yes
Dm_00013369-RA		Zinc finger, C3HC4 type (RING finger) family protein	protein.degradation.ubiquitin.E3.RING	AT5G23110	(at5g23110 : 2820.0) Zinc finger, C3HC4 type (RING finger) family protein; FUNCTIONS IN: zinc ion binding, ATP binding; EXPRESSED IN: 22 plant structures; EXPRESSED DURING: 13 growth stages; CONTAINS InterPro DOMAIN/s: Zinc finger, RING-type (InterPro:IPR001841), ATPase-like, ATP-binding domain (InterPro:IPR003594); BEST Arabidopsis thaliana protein match is: Transmembrane Fragile-X-F-associated …	NA	0.769239	0.91306	2.77202	3.53777	2.38069	0.48602	20.1208	4.4607	5.36831	2.8575	3.07868	4.70469	2.50598	1.35546	1.8734	yes
Dm_00002270-RA	GLR3.6	glutamate receptor 3.6	signalling.in sugar and nutrient physiology	AT3G51480	(at3g51480 : 981.0) member of Putative ligand-gated ion channel subunit family; glutamate receptor 3.6 (GLR3.6); FUNCTIONS IN: intracellular ligand-gated ion channel activity; INVOLVED IN: cellular calcium ion homeostasis, response to light stimulus; LOCATED IN: endomembrane system, integral to membrane, membrane; EXPRESSED IN: 15 plant structures; EXPRESSED DURING: 6 growth stages; CONTAINS Inte…	Plant permeome.channels.GIC family.GLR ligand-gated cation channel..	1.05688	2.66305	0.117586	137.928	5.11959	57.3953	395.777	7.21431	2.78558	11.7324	6.27004	8.57672	1.52064	1.31824	1.91862	yes
Dm_00005732-RA	NA	NA	not assigned.unknown	NA	no hits & (original description: transcript offset:0 AED:0.82 eAED:0.82 QI:0|0|0|0.2|1|1|5|0|163)	NA	8.68839	30.5347	31.68	35.4872	32.3284	7.10766	363.616	3.57275	5.67657	3.52155	3.49041	5.37719	3.35227	1.54615	2.03265	yes
Dm_00009686-RA		NB-ARC domain-containing disease resistance protein	stress.biotic.PR-proteins	AT3G14470	(loc_os08g12740.2 : 111.0) no description available & (at3g14470 : 83.2) NB-ARC domain-containing disease resistance protein; FUNCTIONS IN: protein binding; INVOLVED IN: apoptosis, defense response; LOCATED IN: endomembrane system; EXPRESSED IN: 23 plant structures; EXPRESSED DURING: 14 growth stages; CONTAINS InterPro DOMAIN/s: Leucine-rich repeat-containing protein (InterPro:IPR015766), NB-ARC …	NA	4.39361	3.83828	5.1878	3.63405	7.6624	1.66495	63.1705	4.03818	5.27199	3.6017	3.04367	3.83944	4.11623	1.59935	2.10282	yes
Dm_00007946-RA	SKOR	STELAR K outward rectifier	transport.potassium	AT3G02850	(at3g02850 : 803.0) Encodes SKOR, a member of Shaker family potassium ion (K+) channel. This family includes five groups based on phylogenetic analysis (FEBS Letters (2007) 581: 2357): I (inward rectifying channel): AKT1 (AT2G26650), AKT5 (AT4G32500) and SPIK (also known as AKT6, AT2G25600); II (inward rectifying channel): KAT1 (AT5G46240) and KAT2 (AT4G18290); III (weakly inward rectifying chann…	Plant permeome.channels.VIC superfamily.Plant-VG voltage-gated potassium cation channel..	8.88708	5.09624	7.55844	38.4388	24.0486	5.6428	190.178	5.22113	5.07507	4.65683	2.98276	4.41616	2.30669	1.59395	2.15126	yes
Dm_00005081-RA	SYD	P-loop containing nucleoside triphosphate hydrolases superfamily protein	DNA.synthesis/chromatin structure	AT2G28290	(at2g28290 : 776.0) Encodes a SWI2/SNF2-like protein in the SNF2 subclass. Homozygous plants with null mutations exhibit premature termination of the meristem and carpelloid structures from the inflorescence meristem. Co-activator of floral homeotic gene expression. Acts with LFY to regulate shoot apical meristem identity. Required for meristem maintenance. Regulates flowering under a non-inducti…	NA	2.57024	3.8059	7.78268	10.4051	8.71247	2.31037	77.2514	4.34291	5.06969	3.31034	3.1484	4.90821	2.89205	1.6468	2.19342	yes
Dm_00013401-RA	ABCG40	pleiotropic drug resistance 12	transport.ABC transporters and multidrug resistance systems	AT1G15520	(q76cu2|pdr1_tobac : 759.0) Pleiotropic drug resistance protein 1 (NtPDR1) - Nicotiana tabacum (Common tobacco) & (at1g15520 : 736.0) ABC transporter family involved in ABA transport and resistance to lead. Localizes to plasma membrane. Upregulated by lead. Expressed in leaves, flowers, stomata and roots.; pleiotropic drug resistance 12 (PDR12); CONTAINS InterPro DOMAIN/s: ATPase, AAA+ type, core…	Plant permeome.primary active transport.ABC superfamily.ABC-G group.PDR subfamily G transporter.	35.3846	2.35295	4.75209	68.8537	7.33562	36.6314	299.751	6.98837	3.03234	5.97375	5.35338	3.08175	2.12207	1.59209	2.19439	yes
Dm_00009814-RA		WD-40 repeat family protein / beige-like protein	not assigned.no ontology	AT2G45540	(at2g45540 : 1101.0) WD-40 repeat family protein / beige-related; FUNCTIONS IN: nucleotide binding; INVOLVED IN: biological_process unknown; LOCATED IN: cellular_component unknown; EXPRESSED IN: 24 plant structures; EXPRESSED DURING: 14 growth stages; CONTAINS InterPro DOMAIN/s: WD40 repeat-like-containing domain (InterPro:IPR011046), WD40 repeat 2 (InterPro:IPR019782), Beige/BEACH (InterPro:IPR0…	NA	1.40182	2.12634	3.10194	4.24081	3.32957	0.454217	29.061	3.77054	6.01653	3.22113	3.12525	4.36516	2.77326	1.64535	2.21935	yes
Dm_00017457-RA		S-adenosyl-L-methionine-dependent methyltransferases superfamily protein	not assigned.unknown	AT1G24480	(at1g24480 : 330.0) S-adenosyl-L-methionine-dependent methyltransferases superfamily protein; FUNCTIONS IN: methyltransferase activity; INVOLVED IN: metabolic process; LOCATED IN: endomembrane system; CONTAINS InterPro DOMAIN/s: Methyltransferase type 11 (InterPro:IPR013216); BEST Arabidopsis thaliana protein match is: S-adenosyl-L-methionine-dependent methyltransferases superfamily protein (TAIR…	NA	1.34151	4.45602	1.49564	6.62014	7.27774	2.29717	49.1229	3.46513	4.42104	5.10516	2.76076	5.14635	2.88069	1.66685	2.23473	yes
Dm_00002514-RA	NA	NA	not assigned.unknown	NA	no hits & (original description: transcript offset:0 AED:0.71 eAED:0.76 QI:0|0|0|0.33|1|1|3|0|124)	NA	1.21374	5.11893	17.1516	12.3802	11.9776	0.196723	90.7881	4.14286	8.72977	2.38647	2.92497	6.19677	2.87477	1.62955	2.24149	yes
Dm_00008614-RA	SAB	HYPERSENSITIVE TO PI STARVATION 4	development.unspecified	AT1G58250	(at1g58250 : 298.0) SABRE, putative gene of unknown function, homologous to maize apt1 gene. Required for normal cell expansion in the root cortex. The sabre mutation results in abnormal cell expansion. Encodes a rare message; very low level of expression was detected in roots and shoots.; SABRE (SAB); CONTAINS InterPro DOMAIN/s: Protein of unknown function FMP27, domain-6, C-terminal (InterPro:I…	NA	0.837633	1.7869	3.46099	4.11677	2.6109	0.937564	28.8147	4.00689	4.94687	3.06778	3.46786	5.07174	2.80473	1.70098	2.27443	yes
Dm_00005249-RA		calcium-dependent lipid-binding family protein	not assigned.no ontology.C2 domain-containing protein	AT1G48090	(at1g48090 : 371.0) calcium-dependent lipid-binding family protein; FUNCTIONS IN: phosphoinositide binding; INVOLVED IN: signal transduction; LOCATED IN: chloroplast; EXPRESSED IN: 26 plant structures; EXPRESSED DURING: 15 growth stages; CONTAINS InterPro DOMAIN/s: C2 membrane targeting protein (InterPro:IPR018029), Protein of unknown function DUF946 (InterPro:IPR009291), Vacuolar protein sorting…	NA	1.10205	0.993946	2.69965	3.44496	2.21642	1.47865	24.7217	4.6283	4.07594	3.18812	3.47887	4.49894	2.84814	1.72646	2.30374	yes
Dm_00000438-RA	OPT6	oligopeptide transporter 1	transport.peptides and oligopeptides	AT4G27730	(at4g27730 : 225.0) oligopeptide transporter; oligopeptide transporter 1 (OPT6); FUNCTIONS IN: oligopeptide transporter activity; INVOLVED IN: oligopeptide transport; LOCATED IN: plasma membrane, membrane; EXPRESSED IN: 9 plant structures; EXPRESSED DURING: 4 anthesis, F mature embryo stage, petal differentiation and expansion stage, E expanded cotyledon stage, D bilateral stage; CONTAINS InterPr…	NA	0.943956	0.654562	1.01458	11.3069	1.3891	9.16906	38.7325	5.89037	2.08813	5.30133	4.78252	5.32386	1.78345	1.60939	2.30748	yes
Dm_00009337-RA	NA	NA	not assigned.unknown	NA	no hits & (original description: transcript offset:0 AED:0.69 eAED:0.76 QI:0|0|0|0.5|0|0|4|0|110)	NA	17.5456	22.7403	15.1597	83.5132	66.6074	16.6107	404.246	4.15218	4.60565	4.74015	2.60198	4.52541	2.27552	1.72608	2.35798	yes
Dm_00020293-RA	NA	NA	PS.lightreaction.photosystem I.PSI polypeptide subunits	NA	(p06407|psab_tobac : 297.0) Photosystem I P700 chlorophyll a apoprotein A2 (PsaB) (PSI-B) - Nicotiana tabacum (Common tobacco) & (atcg00340 : 292.0) Encodes the D1 subunit of photosystem I and II reaction centers.; PSAB; FUNCTIONS IN: chlorophyll binding; INVOLVED IN: photosynthesis, light harvesting in photosystem II, photosynthesis, light harvesting in photosystem I; LOCATED IN: in 7 components…	NA	14.1544	11.7441	6.93461	48.3447	40.0988	7.1477	219.314	4.22321	4.93988	4.98671	2.45176	3.95313	2.18186	1.75543	2.42043	yes
Dm_00001668-RA	GSL8	glucan synthase-like 8	minor CHO metabolism.callose	AT2G36850	(at2g36850 : 134.0) Encodes GSL8, a member of the Glucan Synthase-Like (GSL) family believed to be involved in the synthesis of the cell wall component callose. GSL8 is required for male gametophyte development and plant growth. Has a role in entry of microspores into mitosis. Also refer to GSL10 (At3g07160).; glucan synthase-like 8 (GSL8); FUNCTIONS IN: transferase activity, transferring glycosy…	NA	2.5804	5.67211	8.7782	9.72904	7.22426	1.43165	63.3199	3.4733	5.48816	2.82027	3.13715	4.60002	2.6888	1.78966	2.43057	yes
Dm_00007764-RA	ABCG12	ABC-2 type transporter family protein	transport.ABC transporters and multidrug resistance systems	AT1G51500	(at1g51500 : 95.9) Encodes an ABC transporter involved in cuticular wax biosynthesis. Lines carrying recessive mutations in this locus have weakly glaucous stem surface, and relative elevated secondary alcohols and ketones.; ECERIFERUM 5 (CER5); FUNCTIONS IN: ATPase activity, coupled to transmembrane movement of substances; INVOLVED IN: wax biosynthetic process; LOCATED IN: membrane; EXPRESSED IN…	NA	1.80216	8.22592	16.7942	17.5564	32.1312	10.6205	146.865	4.15031	3.80045	3.13748	2.19142	6.36169	3.06446	1.79457	2.46657	yes
Dm_00006060-RA		transcription regulator	RNA.regulation of transcription.putative transcription regulator	AT1G02080	(at1g02080 : 181.0) transcription regulators; FUNCTIONS IN: transcription regulator activity; EXPRESSED IN: 25 plant structures; EXPRESSED DURING: 15 growth stages; CONTAINS InterPro DOMAIN/s: CCR4-Not complex component, Not1 (InterPro:IPR007196). & (loc_os10g40780.3 : 173.0) no description available & (reliability: 362.0) & (original description: transcript offset:0 AED:0.51 eAED:0.56 QI:0|0|0|0…	NA	1.08774	3.89912	10.0049	7.86049	7.2522	1.06065	51.5826	3.72327	5.5936	2.36246	2.82678	5.57883	2.70912	1.80029	2.48405	yes
Dm_00003988-RA		sulfatase and phosphatidylinositolglycan class N domain-containing protein	not assigned.no ontology	AT3G01380	(at3g01380 : 87.4) transferases;sulfuric ester hydrolases;catalytics;transferases; FUNCTIONS IN: sulfuric ester hydrolase activity, transferase activity, catalytic activity; INVOLVED IN: GPI anchor biosynthetic process, metabolic process; LOCATED IN: endoplasmic reticulum; EXPRESSED IN: 24 plant structures; EXPRESSED DURING: 13 growth stages; CONTAINS InterPro DOMAIN/s: GPI ethanolamine phosphate…	NA	1.75699	2.2195	1.63594	3.22722	2.33774	1.51058	21.711	3.27845	3.83307	3.79282	3.19925	3.64451	2.76643	1.88426	2.5482	yes
Dm_00003337-RA		zinc finger FYVE domain protein	not assigned.unknown	AT2G25730	(at2g25730 : 535.0) unknown protein; LOCATED IN: cellular_component unknown; EXPRESSED IN: 23 plant structures; EXPRESSED DURING: 14 growth stages. & (loc_os01g40990.3 : 347.0) no description available & (reliability: 1070.0) & (original description: transcript offset:0 AED:0.32 eAED:0.34 QI:0|0|0|0.87|0.71|0.75|8|0|686)	NA	1.75039	2.95381	3.90128	4.82634	3.70983	1.21593	30.1966	3.35116	4.62479	2.95308	3.02366	4.11798	2.64541	1.88471	2.56992	yes
Dm_00018676-RA	NA	NA	not assigned.unknown	NA	no hits & (original description: transcript offset:0 AED:0.51 eAED:0.51 QI:0|0|0|0.66|0|0|3|0|60)	NA	19.8523	4.98085	1.23258	14.5655	4.22263	26.9094	110.409	4.47275	2.03798	6.5854	4.72242	2.47834	2.92857	1.83906	2.57273	yes
Dm_00001667-RA	GSL8	glucan synthase-like 8	minor CHO metabolism.callose	AT2G36850	(at2g36850 : 84.3) Encodes GSL8, a member of the Glucan Synthase-Like (GSL) family believed to be involved in the synthesis of the cell wall component callose. GSL8 is required for male gametophyte development and plant growth. Has a role in entry of microspores into mitosis. Also refer to GSL10 (At3g07160).; glucan synthase-like 8 (GSL8); FUNCTIONS IN: transferase activity, transferring glycosyl…	NA	3.91906	9.62244	14.5758	13.2234	11.9064	2.46464	87.8353	3.1839	5.16401	2.5875	2.88779	4.47909	2.72481	1.88739	2.59604	yes
Dm_00009252-RA	NA	NA	not assigned.unknown	NA	no hits & (original description: transcript offset:0 AED:0.57 eAED:0.57 QI:0|0|0|0.5|1|1|2|0|54)	NA	10.1197	20.1677	24.78	28.2183	23.604	6.34421	176.919	3.13279	4.84442	2.85073	2.9042	4.09811	2.63756	1.9166	2.63032	yes
Dm_00004609-RA	GLR3.4	glutamate receptor 3.4	signalling.in sugar and nutrient physiology	AT1G05200	(at1g05200 : 1043.0) member of Putative ligand-gated ion channel subunit family; glutamate receptor 3.4 (GLR3.4); FUNCTIONS IN: protein binding, intracellular ligand-gated ion channel activity; INVOLVED IN: cellular calcium ion homeostasis, response to light stimulus; LOCATED IN: integral to membrane, membrane; EXPRESSED IN: 20 plant structures; EXPRESSED DURING: 13 growth stages; CONTAINS InterP…	Plant permeome.channels.GIC family.GLR ligand-gated cation channel..	0.556301	8.02044	13.4835	135.151	69.0064	33.2903	310.106	5.27234	3.2195	4.52367	2.1677	9.08274	1.19797	1.79313	2.66894	yes
Dm_00009687-RA		LRR and NB-ARC domains-containing disease resistance protein	stress.biotic	AT3G14460	(loc_os05g41290.1 : 164.0) no description available & (at3g14460 : 130.0) LRR and NB-ARC domains-containing disease resistance protein; FUNCTIONS IN: ATP binding; INVOLVED IN: apoptosis, defense response; CONTAINS InterPro DOMAIN/s: NB-ARC (InterPro:IPR002182), Leucine-rich repeat (InterPro:IPR001611), Disease resistance protein (InterPro:IPR000767); BEST Arabidopsis thaliana protein match is: NB…	NA	6.48244	4.85272	8.0654	5.48534	9.96543	1.76729	52.9851	3.44657	4.91192	2.71296	2.41211	3.02023	3.26406	1.97364	2.73161	yes
Dm_00001671-RA	GSL8	glucan synthase-like 8	minor CHO metabolism.callose	AT2G36850	(at2g36850 : 211.0) Encodes GSL8, a member of the Glucan Synthase-Like (GSL) family believed to be involved in the synthesis of the cell wall component callose. GSL8 is required for male gametophyte development and plant growth. Has a role in entry of microspores into mitosis. Also refer to GSL10 (At3g07160).; glucan synthase-like 8 (GSL8); FUNCTIONS IN: transferase activity, transferring glycosy…	NA	5.84433	11.516	18.305	17.1694	14.8114	2.10342	97.737	3.08122	5.51181	2.41537	2.71791	4.06303	2.50885	1.96262	2.73969	yes
Dm_00014160-RA		PHD-finger and DNA binding domain-containing protein	RNA.regulation of transcription.PHD finger transcription factor	AT5G12400	(at5g12400 : 377.0) DNA binding;zinc ion binding;DNA binding; FUNCTIONS IN: DNA binding, zinc ion binding; INVOLVED IN: regulation of transcription, DNA-dependent; LOCATED IN: nucleus; EXPRESSED IN: 18 plant structures; EXPRESSED DURING: 9 growth stages; CONTAINS InterPro DOMAIN/s: AT hook, DNA-binding motif (InterPro:IPR017956), DDT domain (InterPro:IPR004022), Zinc finger, PHD-type, conserved s…	NA	2.68258	6.03733	6.61313	9.37603	6.46814	2.41878	47.8726	2.98611	4.31871	2.85381	2.88611	4.15309	2.34727	1.98497	2.75202	yes
Dm_00013473-RA		GDSL-like Lipase/Acylhydrolase superfamily protein	misc.GDSL-motif lipase	AT1G29670	(at1g29670 : 328.0) GDSL-like Lipase/Acylhydrolase superfamily protein; FUNCTIONS IN: hydrolase activity, acting on ester bonds, carboxylesterase activity; INVOLVED IN: lipid metabolic process; LOCATED IN: apoplast, cell wall, chloroplast; EXPRESSED IN: 23 plant structures; EXPRESSED DURING: 14 growth stages; CONTAINS InterPro DOMAIN/s: Lipase, GDSL (InterPro:IPR001087); BEST Arabidopsis thaliana…	NA	2.07768	5.28194	1.67023	3.99587	7.5885	4.70122	35.05	2.73164	2.9015	4.41323	2.21044	4.06506	3.13204	1.99561	2.77992	yes
Dm_00001531-RA		DEK domain-containing chromatin associated protein	not assigned.unknown	AT5G55660	(at5g55660 : 256.0) DEK domain-containing chromatin associated protein; CONTAINS InterPro DOMAIN/s: DEK, C-terminal (InterPro:IPR014876); BEST Arabidopsis thaliana protein match is: DEK domain-containing chromatin associated protein (TAIR:AT4G26630.2); Has 1807 Blast hits to 1807 proteins in 277 species: Archae - 0; Bacteria - 0; Metazoa - 736; Fungi - 347; Plants - 385; Viruses - 0; Other Eukary…	NA	25.7898	113.593	70.6342	51.3359	72.8378	32.6564	502.486	2.14509	3.94332	2.83053	2.78605	4.28328	3.2906	2.00416	2.79499	yes
Dm_00008596-RA	GSL10	glucan synthase-like 10	minor CHO metabolism.callose	AT3G07160	(at3g07160 : 184.0) Encodes GSL10, a member of the Glucan Synthase-Like (GSL) family believed to be involved in the synthesis of the cell wall component callose. GSL10 is required for male gametophyte development and plant growth. Has a role in entry of microspores into mitosis. GSL10 mutation leads to perturbation of microspore division symmetry, irregular callose deposition and failure of gener…	NA	11.0561	27.528	19.1518	25.706	20.1317	3.45219	142.812	2.37403	5.37971	2.89835	2.82518	3.68935	2.47314	2.01063	2.81751	yes
Dm_00015144-RA		RNA helicase family protein	DNA.synthesis/chromatin structure	AT1G58060	(at1g58060 : 187.0) RNA helicase family protein; FUNCTIONS IN: helicase activity, nucleic acid binding, ATP-dependent helicase activity, ATP binding; INVOLVED IN: biological_process unknown; LOCATED IN: chloroplast; CONTAINS InterPro DOMAIN/s: Helicase-associated domain (InterPro:IPR007502), DNA/RNA helicase, DEAD/DEAH box type, N-terminal (InterPro:IPR011545), Domain of unknown function DUF1605 …	NA	2.62571	5.01883	7.75317	7.49902	6.11584	2.63289	43.1616	3.10079	4.0301	2.47626	2.81719	4.03552	2.52403	2.02578	2.81921	yes
Dm_00016986-RA		Acyl-CoA N-acyltransferase with RING/FYVE/PHD-type zinc finger protein	RNA.regulation of transcription.PHD finger transcription factor	AT4G14920	(at4g14920 : 336.0) Acyl-CoA N-acyltransferase with RING/FYVE/PHD-type zinc finger protein; FUNCTIONS IN: DNA binding, zinc ion binding; INVOLVED IN: regulation of transcription, DNA-dependent; LOCATED IN: nucleus; EXPRESSED IN: 23 plant structures; EXPRESSED DURING: 14 growth stages; CONTAINS InterPro DOMAIN/s: Zinc finger, PHD-type, conserved site (InterPro:IPR019786), Zinc finger, PHD-type (In…	NA	6.24103	11.2555	15.2419	18.2041	14.3764	6.8205	98.8339	3.13377	3.85742	2.69589	2.78027	3.9795	2.44014	2.03054	2.82124	yes
Dm_00007419-RA		Cleavage and polyadenylation specificity factor (CPSF) A subunit protein	RNA.processing.splicing	AT3G11960	(at3g11960 : 107.0) Cleavage and polyadenylation specificity factor (CPSF) A subunit protein; FUNCTIONS IN: nucleic acid binding; INVOLVED IN: biological_process unknown; LOCATED IN: nucleus, chloroplast; EXPRESSED IN: 23 plant structures; EXPRESSED DURING: 13 growth stages; CONTAINS InterPro DOMAIN/s: Cleavage/polyadenylation specificity factor, A subunit, C-terminal (InterPro:IPR004871); BEST A…	NA	1.96576	4.8772	7.08797	7.63113	7.58538	1.82525	40.2337	3.04033	4.509	2.46765	2.39881	4.30702	2.39999	2.02954	2.85314	yes
Dm_00016772-RA	NA	NA	not assigned.unknown	NA	(loc_os10g31990.1 : 178.0) no description available & (reliability: 100.0) & (original description: transcript offset:0 AED:0.35 eAED:0.35 QI:0|-1|0|1|-1|1|1|0|324)	NA	1.53355	2.07022	3.09803	5.82579	4.98881	0.775023	20.6809	3.31647	4.7514	2.72053	2.05687	3.7379	1.83217	1.98468	2.86985	yes
Dm_00004765-RA	IBM1	Transcription factor jumonji (jmjC) domain-containing protein	protein.degradation.ubiquitin.E3.RING	AT3G07610	(loc_os02g58210.1 : 130.0) no description available & (at3g07610 : 113.0) IBM1 likely encodes a protein with histone H3mK9 demethylation activity. It may preferentially demethylate H3mK9 at low-copy loci to protect them from silencing by nearby heterochromatin by preventing the spread of cytosine methylation. BONSAI (At1g73177) is hypermethylated in ibm1 mutants. ibm1 mutants have morphological d…	NA	3.96644	9.47842	9.09812	8.93161	7.02131	2.00955	51.8449	2.44918	4.6727	2.51482	2.88317	3.69999	2.53067	2.05785	2.89076	yes
Dm_00006221-RA	NA	NA	not assigned.unknown	NA	no hits & (original description: transcript offset:0 AED:0.76 eAED:0.76 QI:0|0|0|0.5|1|1|2|0|67)	NA	2.12148	2.98618	8.53761	6.18421	6.44041	1.83086	35.0592	3.54324	4.29054	1.98778	2.43622	4.02123	2.48613	2.04644	2.89566	yes
Dm_00000040-RA	PRX52	Peroxidase superfamily protein	misc.peroxidases	AT5G05340	(p22195|per1_arahy : 372.0) Cationic peroxidase 1 precursor (EC 1.11.1.7) (PNPC1) - Arachis hypogaea (Peanut) & (loc_os07g48010.1 : 360.0) no description available & (at5g05340 : 339.0) Peroxidase superfamily protein; FUNCTIONS IN: protein binding, peroxidase activity; INVOLVED IN: response to oxidative stress, oxidation reduction; LOCATED IN: apoplast, cell wall; EXPRESSED IN: 9 plant structures…	NA	1.74099	3.67878	4.42853	5.18262	21.9346	3.62647	43.8778	3.57761	3.59418	3.30804	1.00216	4.62969	3.08503	1.97335	2.9183	yes
Dm_00001670-RA	NA	NA	not assigned.unknown	NA	no hits & (original description: transcript offset:0 AED:0.53 eAED:0.54 QI:0|0|0|0.5|0|0|2|0|72)	NA	3.89463	7.72269	15.0632	11.597	11.8798	1.64681	62.7636	3.01913	5.34025	2.05802	2.40086	3.9579	2.40738	2.06608	2.94023	yes
Dm_00000321-RA	NA	NA	not assigned.unknown	NA	no hits & (original description: transcript offset:0 AED:0.64 eAED:0.64 QI:0|-1|0|1|-1|1|1|0|88)	NA	3.23715	5.09489	6.81559	6.90033	7.44978	2.14918	38.4879	2.91703	4.15803	2.47873	2.37119	3.60864	2.46824	2.10838	2.9741	yes
Dm_00014374-RA	LBA1	RNA helicase	RNA.processing.RNA helicase	AT5G47010	(at5g47010 : 180.0) Required for nonsense-mediated mRNA decay. Involved in RNA interference. lba1 mutants has reduced sugar-induced expression of Atb- amylase, is hypersensitive to glucose and abscisic acid and resistant to mannose, and shows early flowering, short day-sensitive growth, and seed germination phenotypes.; LOW-LEVEL BETA-AMYLASE 1 (LBA1); FUNCTIONS IN: in 6 functions; INVOLVED IN: s…	NA	5.36959	10.3742	16.1229	11.904	12.0604	4.6611	73.2511	2.81826	3.98635	2.18205	2.59925	3.79132	2.62056	2.1084	2.97694	yes
Dm_00013302-RA		Urb2/Npa2 family protein	not assigned.unknown	AT4G30150	(at4g30150 : 553.0) CONTAINS InterPro DOMAIN/s: Nucleolar 27S pre-rRNA processing, Urb2/Npa2 (InterPro:IPR018849); Has 58 Blast hits to 49 proteins in 21 species: Archae - 0; Bacteria - 2; Metazoa - 2; Fungi - 0; Plants - 44; Viruses - 3; Other Eukaryotes - 7 (source: NCBI BLink). & (reliability: 1106.0) & (original description: transcript offset:0 AED:0.27 eAED:0.27 QI:0|0|0|0.75|1|0.75|4|0|1233)	NA	1.45784	2.75325	3.60256	4.06094	2.99266	1.82399	20.4053	2.88731	3.48324	2.49924	2.76761	3.80259	2.32372	2.11906	2.98139	yes
Dm_00008695-RA	NA	NA	not assigned.unknown	NA	no hits & (original description: transcript offset:0 AED:0.66 eAED:0.66 QI:0|0|0|0.5|1|1|2|0|53)	NA	8.77853	19.5883	28.2083	23.1264	20.6539	9.85082	129.297	2.71913	3.69079	2.19085	2.65005	3.84506	2.47993	2.1337	3.02306	yes
Dm_00009608-RA		HEAT repeat-containing protein	not assigned.unknown	AT5G16210	(at5g16210 : 117.0) HEAT repeat-containing protein; FUNCTIONS IN: binding; INVOLVED IN: biological_process unknown; LOCATED IN: endomembrane system; EXPRESSED IN: 23 plant structures; EXPRESSED DURING: 15 growth stages; CONTAINS InterPro DOMAIN/s: Armadillo-like helical (InterPro:IPR011989), HEAT, type 2 (InterPro:IPR021133), LisH dimerisation motif (InterPro:IPR006594), Armadillo-type fold (Inte…	NA	1.88073	3.13013	5.31115	5.59278	4.64614	1.91611	26.2338	3.06132	3.75486	2.30034	2.49655	3.79188	2.22794	2.13067	3.02349	yes
Dm_00007744-RA		midasin-like protein	protein.synthesis.ribosome biogenesis	AT1G67120	(at1g67120 : 665.0) ATPases;nucleotide binding;ATP binding;nucleoside-triphosphatases;transcription factor binding; FUNCTIONS IN: nucleoside-triphosphatase activity, ATPase activity, transcription factor binding, nucleotide binding, ATP binding; INVOLVED IN: regulation of transcription, DNA-dependent, regulation of protein complex assembly; LOCATED IN: chloroplast envelope; EXPRESSED IN: 23 plant…	NA	1.5389	2.04441	6.46711	3.6412	3.1928	1.7508	21.1593	3.37085	3.5919	1.70943	2.72765	3.7789	2.5384	2.11801	3.02929	yes
Dm_00012585-RA		WD40 domain-containing protein	development.unspecified	AT2G47410	(at2g47410 : 262.0) WD40/YVTN repeat-like-containing domain;Bromodomain; FUNCTIONS IN: nucleotide binding; LOCATED IN: CUL4 RING ubiquitin ligase complex; EXPRESSED IN: 24 plant structures; EXPRESSED DURING: 15 growth stages; CONTAINS InterPro DOMAIN/s: WD40 repeat 2 (InterPro:IPR019782), WD40 repeat, conserved site (InterPro:IPR019775), WD40 repeat (InterPro:IPR001680), Bromodomain (InterPro:IPR…	NA	1.80771	3.4183	5.10538	5.3238	4.6469	1.53073	25.2291	2.88225	4.0516	2.31112	2.42946	3.78829	2.2424	2.13146	3.03093	yes
Dm_00001462-RA	MOR1	ARM repeat superfamily protein	cell.organisation	AT2G35630	(loc_os01g60040.2 : 220.0) no description available & (at2g35630 : 216.0) Member of the MAP215 family of microtubule-associated proteins required to establish interphase arrays of cortical microtubules.Mutants have defects in cytokinesis during pollen development. Vegetative phenotypes observed in temperature sensitive mutants include left-handed organ twisting, isotropic cell expansion and impai…	NA	2.89774	8.20688	6.15139	7.32883	4.98081	1.52486	35.5057	2.10894	4.52338	2.54843	2.83034	3.64517	2.26461	2.12513	3.03252	yes
Dm_00016520-RA	IDD12	indeterminate(ID)-domain 12	RNA.regulation of transcription.unclassified, RNA.regulation of transcription.C2H2 zinc finger family	AT4G02670	(at4g02670 : 321.0) indeterminate(ID)-domain 12 (IDD12); FUNCTIONS IN: sequence-specific DNA binding transcription factor activity, zinc ion binding, nucleic acid binding; INVOLVED IN: regulation of transcription; LOCATED IN: intracellular, chloroplast; EXPRESSED IN: shoot apex, embryo, flower, pedicel, seed; EXPRESSED DURING: 4 anthesis, C globular stage, petal differentiation and expansion stag…	NA	8.45636	15.5252	11.5458	21.9628	10.0678	6.27508	85.6005	2.46223	3.77282	2.88891	3.08609	3.33744	1.961	2.13726	3.03453	yes
Dm_00002129-RA	NA	NA	not assigned.unknown	NA	no hits & (original description: transcript offset:0 AED:0.71 eAED:0.71 QI:0|0|0|0.33|1|1|3|0|220)	NA	3.39515	6.28315	9.21997	8.11389	7.99606	4.31028	46.0932	2.86812	3.41554	2.30556	2.5259	3.75235	2.4891	2.14876	3.03864	yes
Dm_00016540-RA	ABCG32	pleiotropic drug resistance 4	transport.ABC transporters and multidrug resistance systems	AT2G26910	(at2g26910 : 1712.0) pleiotropic drug resistance 4 (PDR4); FUNCTIONS IN: ATPase activity, coupled to transmembrane movement of substances; INVOLVED IN: drug transmembrane transport; LOCATED IN: membrane; EXPRESSED IN: 23 plant structures; EXPRESSED DURING: 13 growth stages; CONTAINS InterPro DOMAIN/s: ATPase, AAA+ type, core (InterPro:IPR003593), ABC transporter-like (InterPro:IPR003439), Plant P…	Plant permeome.primary active transport.ABC superfamily.ABC-G group.PDR subfamily G transporter.	5.15401	36.707	29.8034	49.9479	47.1737	21.238	211.705	2.5277	3.31719	2.82852	2.16567	5.35285	2.08316	2.12254	3.0467	yes
Dm_00013386-RA		nucleoporin	DNA.synthesis/chromatin structure	AT4G31570	(at4g31570 : 816.0) CONTAINS InterPro DOMAIN/s: Prefoldin (InterPro:IPR009053); BEST Arabidopsis thaliana protein match is: unknown protein (TAIR:AT1G24460.1); Has 194354 Blast hits to 66887 proteins in 3244 species: Archae - 3688; Bacteria - 38556; Metazoa - 84828; Fungi - 17265; Plants - 10589; Viruses - 805; Other Eukaryotes - 38623 (source: NCBI BLink). & (loc_os02g38480.1 : 127.0) no descrip…	NA	2.85552	5.6589	9.89145	10.3393	9.56108	2.32245	45.4825	3.00622	4.29191	2.20077	2.2498	3.99347	2.13683	2.12592	3.04681	yes
Dm_00018820-RA	NA	NA	not assigned.unknown	NA	no hits & (original description: transcript offset:0 AED:0.60 eAED:0.60 QI:0|0|0|0.5|0|0|2|0|131)	NA	1.17962	2.68582	5.69783	2.56694	3.89337	1.18973	20.4298	2.92326	4.10648	1.8541	2.39146	4.04292	3.00188	2.14156	3.05827	yes
Dm_00017212-RA		Pentatricopeptide repeat (PPR) superfamily protein	not assigned.no ontology.pentatricopeptide (PPR) repeat-containing protein	AT3G54980	(at3g54980 : 530.0) Pentatricopeptide repeat (PPR) superfamily protein; CONTAINS InterPro DOMAIN/s: Pentatricopeptide repeat (InterPro:IPR002885); BEST Arabidopsis thaliana protein match is: LATERAL ORGAN JUNCTION (TAIR:AT2G39230.1); Has 66577 Blast hits to 14412 proteins in 313 species: Archae - 5; Bacteria - 80; Metazoa - 1084; Fungi - 1336; Plants - 61678; Viruses - 0; Other Eukaryotes - 2394 …	NA	2.48687	4.77356	7.6724	6.703	5.55938	2.5926	33.9253	2.82708	3.70447	2.14354	2.60604	3.7716	2.33597	2.15138	3.06061	yes
Dm_00003099-RA	UPL4	ubiquitin-protein ligase 4	protein.degradation.ubiquitin.E3.HECT	AT5G02880	(at5g02880 : 369.0) encodes a ubiquitin-protein ligase containing a HECT domain. There are six other HECT-domain UPLs in Arabidopsis.; ubiquitin-protein ligase 4 (UPL4); CONTAINS InterPro DOMAIN/s: Armadillo-like helical (InterPro:IPR011989), Armadillo-type fold (InterPro:IPR016024), HECT (InterPro:IPR000569); BEST Arabidopsis thaliana protein match is: HEAT repeat ;HECT-domain (ubiquitin-transfe…	NA	3.73922	4.12287	20.2166	14.3455	14.9637	4.02775	65.004	3.97596	4.00531	1.6828	2.11681	4.10646	2.17959	2.10672	3.06634	yes
Dm_00006059-RA		transcription regulator	RNA.regulation of transcription.putative transcription regulator	AT1G02080	(at1g02080 : 172.0) transcription regulators; FUNCTIONS IN: transcription regulator activity; EXPRESSED IN: 25 plant structures; EXPRESSED DURING: 15 growth stages; CONTAINS InterPro DOMAIN/s: CCR4-Not complex component, Not1 (InterPro:IPR007196). & (loc_os03g01240.1 : 154.0) no description available & (reliability: 344.0) & (original description: transcript offset:0 AED:0.63 eAED:0.70 QI:0|0|0|0…	NA	1.47375	3.40149	7.26318	5.88885	5.97594	1.23318	27.1016	2.98511	4.45092	1.90027	2.17333	4.17112	2.19588	2.12786	3.07734	yes
Dm_00014649-RA	MYB94	myb domain protein 94	RNA.regulation of transcription.MYB domain transcription factor family	AT3G47600	(at3g47600 : 278.0) Encodes a putative transcription factor (MYB94).; myb domain protein 94 (MYB94); CONTAINS InterPro DOMAIN/s: SANT, DNA-binding (InterPro:IPR001005), Homeodomain-like (InterPro:IPR009057), Myb, DNA-binding (InterPro:IPR014778), HTH transcriptional regulator, Myb-type, DNA-binding (InterPro:IPR017930), Homeodomain-related (InterPro:IPR012287), Myb transcription factor (InterPro:…	NA	1.18792	19.0419	30.1858	35.4719	45.248	25.0588	166.152	3.12363	2.7277	2.46116	1.87646	7.17408	2.22698	2.12111	3.07795	yes
Dm_00004570-RA		pleckstrin homology (PH) domain-containing protein	not assigned.no ontology.C2 domain-containing protein	AT4G17140	(at4g17140 : 1427.0) pleckstrin homology (PH) domain-containing protein; FUNCTIONS IN: molecular_function unknown; INVOLVED IN: biological_process unknown; EXPRESSED IN: 23 plant structures; EXPRESSED DURING: 13 growth stages; CONTAINS InterPro DOMAIN/s: Pleckstrin homology-type (InterPro:IPR011993), Protein of unknown function DUF946 (InterPro:IPR009291), Pleckstrin homology (InterPro:IPR001849)…	NA	1.67021	2.06807	8.02501	6.20769	5.8649	0.872488	25.8396	3.64228	4.89448	1.68625	2.139	3.94773	2.05655	2.11064	3.08261	yes
Dm_00004111-RA	MEE44	Nucleotidyltransferase family protein	development.unspecified	AT4G00060	(at4g00060 : 267.0) maternal effect embryo arrest 44 (MEE44); FUNCTIONS IN: nucleotidyltransferase activity; INVOLVED IN: embryo development ending in seed dormancy; CONTAINS InterPro DOMAIN/s: Nucleotidyl transferase domain (InterPro:IPR002934), PAP/25A-associated (InterPro:IPR002058); BEST Arabidopsis thaliana protein match is: Nucleotidyltransferase family protein (TAIR:AT5G53770.1); Has 30201…	NA	2.63487	3.87827	6.46294	5.55514	5.19534	3.48449	30.8876	2.99058	3.14822	2.25133	2.56801	3.54862	2.4684	2.17884	3.09031	yes
Dm_00013129-RA	HK2	histidine kinase 2	hormone metabolism.cytokinin.signal transduction	AT5G35750	(at5g35750 : 1166.0) Encodes histidine kinase AHK2.; histidine kinase 2 (HK2); FUNCTIONS IN: osmosensor activity, cytokinin receptor activity, protein histidine kinase activity; INVOLVED IN: in 8 processes; LOCATED IN: membrane; EXPRESSED IN: 23 plant structures; EXPRESSED DURING: 13 growth stages; CONTAINS InterPro DOMAIN/s: Signal transduction histidine kinase, homodimeric (InterPro:IPR009082),…	NA	9.72485	14.8682	6.5867	12.1419	5.27053	23.2614	77.8712	2.38824	1.74204	3.56361	3.88347	2.9984	2.68115	2.15708	3.10023	yes
Dm_00009589-RA	THO2	THO2	not assigned.unknown	AT1G24706	(at1g24706 : 114.0) Encodes a component of the putative Arabidopsis THO/TREX complex: THO1 or HPR1 (At5g09860), THO2 (At1g24706), THO3 or TEX1 (At5g56130), THO5 (At5g42920, At1g45233), THO6 (At2g19430), and THO7 (At5g16790, At3g02950). THO/TREX complexes in animals have been implicated in the transport of mRNA precursors. Mutants of THO3/TEX1, THO1, THO6 accumulate reduced amount of small interfe…	NA	1.43202	4.84127	8.10014	8.48817	7.63786	1.66847	33.4434	2.78222	4.38222	2.04385	2.13022	4.56408	1.96751	2.14364	3.11587	yes
Dm_00013730-RA	NA	NA	not assigned.unknown	NA	no hits & (original description: transcript offset:0 AED:0.61 eAED:0.61 QI:0|0|0|0.5|1|1|2|0|71)	NA	2.49142	10.8562	7.14597	13.1445	6.88397	0.978602	42.8467	1.9766	5.42556	2.56485	2.64032	4.08305	1.68969	2.13738	3.12206	yes
Dm_00005432-RA	CHR5	chromatin remodeling 5	DNA.synthesis/chromatin structure	AT2G13370	(at2g13370 : 1249.0) chromatin remodeling 5 (CHR5); FUNCTIONS IN: chromatin binding, helicase activity, DNA binding, nucleic acid binding, ATP binding; INVOLVED IN: chromatin assembly or disassembly; LOCATED IN: chromatin, nucleus; EXPRESSED IN: 26 plant structures; EXPRESSED DURING: 15 growth stages; CONTAINS InterPro DOMAIN/s: Chromo domain (InterPro:IPR000953), SNF2-related (InterPro:IPR000330…	NA	3.94912	6.17362	11.3819	12.9561	9.73353	3.84859	51.5595	3.06168	3.74192	2.17864	2.40484	3.69994	1.99239	2.17466	3.1246	yes
Dm_00001106-RA	NKS1	ubiquitin-associated protein (DUF1068)	not assigned.unknown	AT4G30996	(at4g30996 : 97.8) Protein of unknown function (DUF1068); FUNCTIONS IN: molecular_function unknown; INVOLVED IN: biological_process unknown; LOCATED IN: endomembrane system; EXPRESSED IN: 22 plant structures; EXPRESSED DURING: 13 growth stages; CONTAINS InterPro DOMAIN/s: Protein of unknown function DUF1068 (InterPro:IPR010471); BEST Arabidopsis thaliana protein match is: Protein of unknown funct…	NA	5.50947	7.47256	6.48532	7.3065	7.48485	4.67093	43.567	2.5364	3.22163	2.72924	2.52735	2.97446	2.59204	2.20786	3.12896	yes
Dm_00015640-RA	NA	NA	not assigned.unknown	NA	no hits & (original description: transcript offset:0 AED:0.34 eAED:0.34 QI:0|0|0|0.5|1|1|4|0|298)	NA	1.4793	6.9916	6.93258	7.96447	9.64831	6.15994	42.0413	2.58486	2.76643	2.62335	2.11676	4.80673	2.39986	2.18047	3.13046	yes
Dm_00006003-RA	NA	NA	not assigned.unknown	NA	no hits & (original description: transcript offset:0 AED:0.87 eAED:1.00 QI:0|-1|0|1|-1|1|1|0|158)	NA	2.31278	4.76381	6.27053	6.53776	6.0983	1.62518	29.3049	2.61677	4.15161	2.21957	2.26061	3.62912	2.15143	2.18139	3.13901	yes
Dm_00016320-RA	NA	NA	not assigned.unknown	NA	no hits & (original description: transcript offset:0 AED:0.49 eAED:0.50 QI:0|-1|0|1|-1|1|1|0|79)	NA	8.46134	6.44062	26.5839	20.9202	24.6165	22.358	115.689	4.16801	2.37185	2.13099	2.24182	3.76861	2.47898	2.18089	3.14101	yes
Dm_00015168-RA	NET1D	kinase interacting (KIP1-like) family protein	protein.postranslational modification	AT1G03080	(at1g03080 : 904.0) kinase interacting (KIP1-like) family protein; FUNCTIONS IN: molecular_function unknown; INVOLVED IN: biological_process unknown; LOCATED IN: plasma membrane; EXPRESSED IN: 22 plant structures; EXPRESSED DURING: 13 growth stages; CONTAINS InterPro DOMAIN/s: Prefoldin (InterPro:IPR009053), KIP1-like (InterPro:IPR011684); BEST Arabidopsis thaliana protein match is: Kinase intera…	NA	7.28668	12.5093	4.28051	7.16309	5.79493	3.53875	43.2932	1.79044	3.61564	3.33295	2.89998	2.56712	2.595	2.18946	3.14341	yes
Dm_00005679-RA	ATRX	P-loop containing nucleoside triphosphate hydrolases superfamily protein	RNA.regulation of transcription.Chromatin Remodeling Factors	AT1G08600	(at1g08600 : 243.0) ATRX; FUNCTIONS IN: helicase activity, DNA binding, ATP binding, nucleic acid binding; EXPRESSED IN: 24 plant structures; EXPRESSED DURING: 15 growth stages; CONTAINS InterPro DOMAIN/s: DEAD-like helicase, N-terminal (InterPro:IPR014001), DNA/RNA helicase, C-terminal (InterPro:IPR001650), Helicase, superfamily 1/2, ATP-binding domain (InterPro:IPR014021), SNF2-related (InterPr…	NA	2.51918	6.97618	9.95502	8.70037	8.05094	1.87102	39.4976	2.49929	4.41064	1.9913	2.29104	3.97028	2.18058	2.17188	3.14562	yes
Dm_00009132-RA	BEL1	POX (plant homeobox) family protein	RNA.regulation of transcription.HB,Homeobox transcription factor family	AT5G41410	(at5g41410 : 421.0) Homeodomain protein required for ovule identity.Loss of function mutations show homeotic conversion of integuments to carpels.Forms heterodimers with STM and KNAT1. Interacts with AG-SEP heterodimers is thought to restrict WUS expression. BEL interacts with MADS box dimers composed of SEP1(or SEP3) and AG, SHP1, SHP2 and STK. The interaction of BEL1 with AG-SEP3 is required fo…	NA	0.13495	1.61344	3.84035	11.5291	11.3703	2.85644	27.2175	4.07091	3.25387	2.82585	1.25674	7.62497	1.23611	2.04896	3.15107	yes
Dm_00015462-RA	FRS5	FAR1-related sequence 5	signalling.light, RNA.regulation of transcription.unclassified	AT4G38180	(loc_os11g45530.1 : 147.0) no description available & (at4g38180 : 132.0) FAR1-related sequence 5 (FRS5); FUNCTIONS IN: zinc ion binding; INVOLVED IN: response to red or far red light; LOCATED IN: cellular_component unknown; EXPRESSED IN: 22 plant structures; EXPRESSED DURING: 13 growth stages; CONTAINS InterPro DOMAIN/s: MULE transposase, conserved domain (InterPro:IPR018289), Transcription fact…	NA	2.39285	4.97937	18.7933	15.5861	10.1471	4.59325	55.7737	3.48215	3.58978	1.56344	2.45563	4.55544	1.84197	2.14834	3.1576	yes
Dm_00007492-RA	NA	NA	not assigned.unknown	NA	no hits & (original description: transcript offset:0 AED:0.82 eAED:0.82 QI:0|0|0|0.33|0|0.33|3|0|108)	NA	13.7588	4.76293	1.86139	9.77334	3.55656	10.5987	43.374	3.18631	2.03331	4.58864	3.62986	1.65004	2.15465	2.17667	3.19218	yes
Dm_00014864-RA		Alkaline-phosphatase-like family protein	not assigned.no ontology	AT5G17250	(at5g17250 : 344.0) Alkaline-phosphatase-like family protein; FUNCTIONS IN: transferase activity, catalytic activity; INVOLVED IN: GPI anchor biosynthetic process, metabolic process; LOCATED IN: endomembrane system; EXPRESSED IN: 23 plant structures; EXPRESSED DURING: 13 growth stages; CONTAINS InterPro DOMAIN/s: Type I phosphodiesterase/nucleotide pyrophosphatase/phosphate transferase (InterPro:…	NA	2.76285	6.27301	4.73404	3.66245	3.4667	3.5158	25.6031	2.02548	2.87248	2.43747	2.88307	3.21165	2.79619	2.23521	3.20134	yes
Dm_00018589-RA	ACA2	calcium ATPase 2	signalling.calcium, transport.calcium	AT4G37640	(at4g37640 : 1627.0) Encodes a calmodulin-regulated Ca(2+)-pump located in the endoplasmic reticulum. Belongs to plant 2B ATPases with an N-terminal autoinhibitor.; calcium ATPase 2 (ACA2); FUNCTIONS IN: calcium-transporting ATPase activity, calmodulin binding, calcium ion transmembrane transporter activity; INVOLVED IN: transport; LOCATED IN: endoplasmic reticulum, plasma membrane, endoplasmic r…	Plant permeome.primary active transport.P-type ATPase superfamily.P2 family.ACA P2B-type calcium cation-transporting ATPase.	22.2185	33.2334	22.2856	48.5794	44.1567	14.3653	188.18	2.50104	3.71103	3.07714	2.09099	3.08101	1.95353	2.22241	3.20955	yes
Dm_00012528-RA		spectrin beta chain, brain	not assigned.unknown	AT5G22450	(at5g22450 : 176.0) unknown protein; LOCATED IN: chloroplast; EXPRESSED IN: 22 plant structures; EXPRESSED DURING: 13 growth stages; BEST Arabidopsis thaliana protein match is: unknown protein (TAIR:AT2G19390.1); Has 30201 Blast hits to 17322 proteins in 780 species: Archae - 12; Bacteria - 1396; Metazoa - 17338; Fungi - 3422; Plants - 5037; Viruses - 0; Other Eukaryotes - 2996 (source: NCBI BLin…	NA	3.17744	7.4166	9.40745	7.4809	8.70343	5.59464	42.8689	2.52777	2.93259	2.18243	2.2948	3.74421	2.50841	2.24067	3.22224	yes
Dm_00003369-RA		vacuolar protein sorting-associated protein, putative (DUF1162)	not assigned.unknown	AT3G50380	(loc_os12g40279.1 : 892.0) no description available & (at3g50380 : 619.0) INVOLVED IN: protein localization; LOCATED IN: mitochondrion; EXPRESSED IN: 22 plant structures; EXPRESSED DURING: 13 growth stages; CONTAINS InterPro DOMAIN/s: Vacuolar protein sorting-associated protein (InterPro:IPR009543); Has 365 Blast hits to 355 proteins in 118 species: Archae - 0; Bacteria - 0; Metazoa - 156; Fungi …	NA	1.79997	3.62806	7.50185	7.98861	7.29377	2.38537	29.9404	3.0442	3.64979	1.99594	2.03636	4.05498	1.90545	2.20707	3.22282	yes
Dm_00008764-RA		PHD finger family protein	protein.degradation, RNA.regulation of transcription.putative transcription regulator	AT5G22760	(at5g22760 : 444.0) PHD finger family protein; FUNCTIONS IN: DNA binding, zinc ion binding; INVOLVED IN: regulation of transcription, DNA-dependent; EXPRESSED IN: 22 plant structures; EXPRESSED DURING: 14 growth stages; CONTAINS InterPro DOMAIN/s: DDT domain (InterPro:IPR004022), Zinc finger, PHD-type, conserved site (InterPro:IPR019786), EF-Hand 1, calcium-binding site (InterPro:IPR018247), Zinc…	NA	3.2729	5.56201	8.60715	11.3256	9.43003	2.81894	40.4392	2.8607	3.84413	2.23111	2.09938	3.62142	1.83518	2.21874	3.229	yes
Dm_00006743-RA		Protein kinase superfamily protein	protein.postranslational modification	AT3G25840	(loc_os12g44330.2 : 165.0) no description available & (at3g25840 : 132.0) Protein kinase superfamily protein; FUNCTIONS IN: protein serine/threonine kinase activity, protein kinase activity, ATP binding; INVOLVED IN: protein amino acid phosphorylation; LOCATED IN: nucleus; EXPRESSED IN: 25 plant structures; EXPRESSED DURING: 15 growth stages; CONTAINS InterPro DOMAIN/s: Protein kinase, catalytic …	NA	6.00908	15.1548	20.8802	15.7894	15.4873	7.78014	80.8048	2.4141	3.37903	1.95307	2.38104	3.74743	2.35485	2.23954	3.24218	yes
Dm_00011439-RA		eukaryotic translation initiation factor 2 (eIF-2) family protein	protein.synthesis.misc, protein.synthesis.initiation	AT1G76810	(loc_os05g51500.1 : 440.0) no description available & (at1g76810 : 437.0) eukaryotic translation initiation factor 2 (eIF-2) family protein; FUNCTIONS IN: translation factor activity, nucleic acid binding, GTP binding, GTPase activity; LOCATED IN: plasma membrane; EXPRESSED IN: 25 plant structures; EXPRESSED DURING: 15 growth stages; CONTAINS InterPro DOMAIN/s: Small GTP-binding protein (InterPro…	NA	43.0798	55.2712	62.9244	67.4936	61.3427	37.442	335.868	2.60314	3.16523	2.41623	2.45276	2.96232	2.31464	2.26145	3.24348	yes
Dm_00006465-RA		transmembrane protein	not assigned.unknown	AT5G58100	(at5g58100 : 241.0) unknown protein; INVOLVED IN: pollen exine formation; EXPRESSED IN: 19 plant structures; EXPRESSED DURING: 8 growth stages; BEST Arabidopsis thaliana protein match is: unknown protein (TAIR:AT3G28720.1); Has 35333 Blast hits to 34131 proteins in 2444 species: Archae - 798; Bacteria - 22429; Metazoa - 974; Fungi - 991; Plants - 531; Viruses - 0; Other Eukaryotes - 9610 (source:…	NA	5.83135	5.39355	7.72796	9.50085	6.7089	3.3751	38.8547	2.84932	3.51944	2.33283	2.53499	2.73426	2.03366	2.25429	3.2484	yes
Dm_00009455-RA		Calmodulin-binding transcription activator protein with CG-1 and Ankyrin domain	signalling.light	AT1G67310	(at1g67310 : 501.0) Calmodulin-binding transcription activator protein with CG-1 and Ankyrin domains; FUNCTIONS IN: calmodulin binding, transcription regulator activity; INVOLVED IN: regulation of transcription; LOCATED IN: cytosol; EXPRESSED IN: 23 plant structures; EXPRESSED DURING: 13 growth stages; CONTAINS InterPro DOMAIN/s: Immunoglobulin E-set (InterPro:IPR014756), Ankyrin repeat-containin…	NA	11.524	14.9028	25.3254	34.5294	35.93	43.6238	160.163	3.42519	1.87585	2.66009	2.15573	3.79549	2.21322	2.24607	3.2714	yes
Dm_00018644-RA		RNA-binding KH domain-containing protein	RNA.RNA binding	AT5G15270	(at5g15270 : 196.0) RNA-binding KH domain-containing protein; FUNCTIONS IN: RNA binding, nucleic acid binding; INVOLVED IN: biological_process unknown; LOCATED IN: cellular_component unknown; CONTAINS InterPro DOMAIN/s: K Homology, type 1, subgroup (InterPro:IPR018111), K Homology (InterPro:IPR004087), K Homology, type 1 (InterPro:IPR004088); BEST Arabidopsis thaliana protein match is: RNA-bindin…	NA	10.3015	13.9947	12.7033	15.82	10.4956	6.19856	68.728	2.29284	3.47262	2.43867	2.70757	2.72876	2.11991	2.27248	3.2807	yes
Dm_00010933-RA	NA	NA	not assigned.unknown	NA	(loc_os06g47800.1 : 118.0) no description available & (reliability: 100.0) & (original description: transcript offset:0 AED:0.08 eAED:0.10 QI:0|0|0|1|1|1|2|0|242)	NA	1.60161	7.05582	15.776	12.2485	11.0456	1.40703	42.4799	2.58622	4.94833	1.42411	1.94655	4.69388	1.78982	2.18669	3.29549	yes
Dm_00007859-RA	XIK	myosin family protein with Dil	cell.organisation.cytoskeleton.Myosin.Class XI	AT5G20490	(at5g20490 : 1182.0) Encodes a member of the type XI myosin protein family involved in root hair growth, trichome development, and organelle trafficking. This gene appears to be expressed at low levels throughout the plant.; XIK; FUNCTIONS IN: motor activity; INVOLVED IN: in 11 processes; LOCATED IN: myosin complex; EXPRESSED IN: stem, fruit, flower, root, leaf; EXPRESSED DURING: seedling growth;…	NA	4.86	8.5834	14.3397	15.9153	14.6219	3.74608	57.9286	2.7537	3.95609	2.01429	1.98387	3.56856	1.86292	2.24575	3.29638	yes
Dm_00009251-RA	EBS1	EMS-MUTAGENIZED BRI1 SUPPRESSOR 1	protein.glycosylation.UDP-glucose glycoprotein glucosyltransferase	AT1G71220	(at1g71220 : 139.0) Encodes UDP-glucose:glycoprotein glucosyltransferase. Non-receptor component required for EFR-mediated immunity. Mutants show de-repressed anthocyanin accumulation in the presence of elf18, and EFR accumulation and signalling.; EMS-mutagenized bri1 suppressor 1 (EBS1); CONTAINS InterPro DOMAIN/s: Glycosyl transferase, family 8 (InterPro:IPR002495), UDP-glucose:Glycoprotein Glu…	NA	7.38406	10.9925	12.1892	14.6676	11.186	4.35883	58.2705	2.40429	3.7378	2.2611	2.3712	2.98546	1.98115	2.27475	3.30546	yes
Dm_00006218-RA	NRB4	mediator of RNA polymerase II transcription subunit 15a-like protein	not assigned.unknown	AT1G15780	(loc_os08g45080.1 : 97.4) no description available & (at1g15780 : 92.0) unknown protein; BEST Arabidopsis thaliana protein match is: unknown protein (TAIR:AT2G10440.1); Has 103701 Blast hits to 43153 proteins in 1828 species: Archae - 30; Bacteria - 7385; Metazoa - 38639; Fungi - 11531; Plants - 7727; Viruses - 307; Other Eukaryotes - 38082 (source: NCBI BLink). & (reliability: 184.0) & (original…	NA	7.74695	8.38294	13.5617	16.4144	13.7688	2.98668	58.1108	2.78801	4.25694	2.09403	2.07318	2.90343	1.81527	2.26251	3.32031	yes
Dm_00016038-RA		CwfJ-like family protein	not assigned.no ontology	AT1G56290	(at1g56290 : 132.0) CwfJ-like family protein; CONTAINS InterPro DOMAIN/s: Cwf19-like, C-terminal domain-1 (InterPro:IPR006768), Cwf19-like protein, C-terminal domain-2 (InterPro:IPR006767); BEST Arabidopsis thaliana protein match is: CwfJ-like family protein / zinc finger (CCCH-type) family protein (TAIR:AT5G56900.2); Has 2474 Blast hits to 2009 proteins in 284 species: Archae - 2; Bacteria - 39;…	NA	2.73001	4.92146	8.77009	5.29547	7.23946	2.99035	29.8721	2.60225	3.32206	1.76815	2.04784	3.41478	2.48172	2.27354	3.32279	yes
Dm_00008935-RA	SAC9	sacI homology domain-containing protein / WW domain-containing protein	signalling.phosphinositides	AT3G59770	(at3g59770 : 717.0) Encodes a phosphoinositide phosphatase. The sac9 null mutant accumulates elevated levels of PtdIns(4,5)P2 and Ins(1,4,5)P3. The mutant plants have characteristics of constitutive stress responses.; SUPPRESSOR OF ACTIN 9 (SAC9); CONTAINS InterPro DOMAIN/s: WW/Rsp5/WWP (InterPro:IPR001202), Synaptojanin, N-terminal (InterPro:IPR002013); BEST Arabidopsis thaliana protein match is…	NA	8.59554	8.92639	15.1044	16.5768	14.7974	4.09893	63.2161	2.82293	3.94012	2.06277	2.09477	2.8738	1.92927	2.27569	3.33036	yes
Dm_00005557-RA		RNA helicase, ATP-dependent, SK12/DOB1 protein	DNA.unspecified	AT3G46960	(at3g46960 : 467.0) RNA helicase, ATP-dependent, SK12/DOB1 protein; FUNCTIONS IN: hydrolase activity, acting on acid anhydrides, in phosphorus-containing anhydrides, helicase activity, ATP-dependent helicase activity, ATP binding, nucleic acid binding; INVOLVED IN: biological_process unknown; LOCATED IN: vacuole; EXPRESSED IN: 25 plant structures; EXPRESSED DURING: 14 growth stages; CONTAINS Inte…	NA	3.16215	5.65164	6.72143	6.42975	5.81514	1.89761	27.551	2.28066	3.84246	2.03415	2.24023	3.11002	2.09426	2.28382	3.33845	yes
Dm_00007491-RA	NA	NA	not assigned.unknown	NA	no hits & (original description: transcript offset:0 AED:0.73 eAED:0.73 QI:0|0|0|0.2|1|1|5|0|211)	NA	4.8472	3.00348	1.51565	4.45464	1.74836	7.98082	20.7886	2.79076	1.38708	3.82142	3.56956	2.09902	2.2399	2.25335	3.34612	yes
Dm_00014045-RA		Protein kinase superfamily protein	protein.postranslational modification, signalling.MAP kinases	AT3G15220	(at3g15220 : 130.0) Protein kinase superfamily protein; FUNCTIONS IN: protein serine/threonine kinase activity, protein kinase activity, kinase activity, ATP binding; INVOLVED IN: protein amino acid phosphorylation; LOCATED IN: cytoplasm, spindle; EXPRESSED IN: 21 plant structures; EXPRESSED DURING: 11 growth stages; CONTAINS InterPro DOMAIN/s: Protein kinase, ATP binding site (InterPro:IPR017441…	NA	5.75264	9.39393	14.0737	10.521	12.5954	6.65232	54.7351	2.53783	3.02736	1.95882	2.10793	3.24295	2.36561	2.30464	3.35964	yes
Dm_00015593-RA	NA	NA	not assigned.unknown	NA	no hits & (original description: transcript offset:0 AED:0.60 eAED:0.60 QI:0|0|0|0.33|0|1|3|0|385)	NA	26.346	71.6892	79.3813	58.8058	57.7939	35.8766	302.639	2.07722	3.07418	1.93047	2.38814	3.52224	2.36249	2.3005	3.36404	yes
Dm_00011345-RA	NA	NA	not assigned.unknown	NA	no hits & (original description: transcript offset:0 AED:0.84 eAED:0.84 QI:0|0|0|0.5|1|1|4|0|174)	NA	3.53616	5.54984	6.42894	10.556	7.53649	2.19921	31.6454	2.50677	3.8272	2.30456	2.06904	3.1344	1.58026	2.288	3.37987	yes
Dm_00012877-RA		ARM repeat superfamily protein	cell.cycle	AT1G05960	(at1g05960 : 127.0) ARM repeat superfamily protein; FUNCTIONS IN: binding; INVOLVED IN: biological_process unknown; EXPRESSED IN: 24 plant structures; EXPRESSED DURING: 15 growth stages; CONTAINS InterPro DOMAIN/s: Armadillo-type fold (InterPro:IPR016024); BEST Arabidopsis thaliana protein match is: Uncharacterized protein (TAIR:AT2G41830.1); Has 335 Blast hits to 327 proteins in 101 species: Arc…	NA	6.83177	8.9121	10.6676	10.8607	8.79148	10.5753	52.642	2.56554	2.31795	2.31552	2.58881	2.94747	2.27603	2.3298	3.38355	yes
Dm_00008266-RA		ELMO/CED-12 family protein	not assigned.no ontology	AT1G03620	(at1g03620 : 308.0) ELMO/CED-12 family protein; FUNCTIONS IN: molecular_function unknown; INVOLVED IN: phagocytosis; LOCATED IN: cytoskeleton; EXPRESSED IN: 16 plant structures; EXPRESSED DURING: 6 growth stages; CONTAINS InterPro DOMAIN/s: Engulfment/cell motility, ELMO (InterPro:IPR006816); BEST Arabidopsis thaliana protein match is: ELMO/CED-12 family protein (TAIR:AT3G03610.1); Has 828 Blast …	NA	5.90711	10.0571	1.73023	5.94568	2.94845	5.35536	27.7599	1.46852	2.3699	4.01344	3.25734	2.2177	2.22922	2.28257	3.38739	yes
Dm_00007606-RA	RKP	related to KPC1	protein.degradation.ubiquitin.E3.RING	AT2G22010	(at2g22010 : 862.0) Encodes a protein predicted to act as a RING E3 ubiquitin ligase. It appears to regulate the stability of the KRP1/ICK1 cyclin dependent kinase inhibitor. Induced by beet severe curly virus (BSCTV) C4 protein.; related to KPC1 (RKP); FUNCTIONS IN: zinc ion binding; INVOLVED IN: regulation of cell cycle, response to virus, proteolysis involved in cellular protein catabolic proc…	NA	5.13241	6.88727	13.9599	19.2983	15.5741	6.35038	58.6026	3.08821	3.20598	2.06881	1.91015	3.50897	1.60286	2.28858	3.39073	yes
Dm_00010528-RA	ALA1	aminophospholipid ATPase 1	transport.p- and v-ATPases	AT5G04930	(at5g04930 : 1535.0) Encodes a putative aminophospholipid translocase (p-type ATPase) involved in chilling response.; aminophospholipid ATPase 1 (ALA1); FUNCTIONS IN: protein binding, ATPase activity, coupled to transmembrane movement of ions, phosphorylative mechanism; INVOLVED IN: metabolic process, phospholipid transport, ATP biosynthetic process; LOCATED IN: plasma membrane; EXPRESSED IN: 25 …	Plant permeome.primary active transport.P-type ATPase superfamily.P4 family.phospholipid flippase complex.P4-type ATPase component ALA	3.79933	0.844846	4.23655	9.58802	7.75219	10.3223	28.534	5.07835	1.46442	2.74928	1.87844	2.89546	1.57219	2.22167	3.39229	yes
Dm_00020792-RA	CUL1	cullin 1	protein.degradation.ubiquitin.E3.SCF.cullin	AT4G02570	(loc_os01g27150.2 : 155.0) no description available & (at4g02570 : 134.0) Encodes a cullin that is a component of SCF ubiquitin ligase complexes involved in mediating responses to auxin and jasmonic acid. Homozygous auxin-resistant mutants arrest growth soon after germination, lacking a root and hypocotyl. Heterozygotes display a variety of phenotypes consistent with impaired auxin response.; cul…	NA	22.0099	23.264	29.2934	36.5091	30.1256	16.2561	143.656	2.62532	3.14537	2.29151	2.25118	2.70074	1.97574	2.32639	3.39408	yes
Dm_00000964-RA	DOT2	SART-1 family	development.unspecified	AT5G16780	(at5g16780 : 652.0) Encodes a protein belonging to SART-1 family. The gene is expressed in the basal region of the developing embryo during heart stage. Phenotypic analyses of dot2 mutants suggest that this protein plays a role in root, shoot, and flower development. dot2 mutants are dwarved plants that display an aberrant spurred leaf venation pattern and fail to flower. In the roots DOT2 appear…	NA	26.1439	66.9193	53.6308	45.2933	45.4645	36.1365	247.182	1.88479	2.77325	2.20431	2.44264	3.24	2.44774	2.32572	3.40079	yes
Dm_00011219-RA	NA	NA	not assigned.unknown	NA	no hits & (original description: transcript offset:0 AED:0.58 eAED:0.66 QI:0|0|0|0.5|1|1|2|0|133)	NA	1.67927	4.78829	4.29174	5.46635	5.57631	1.80709	20.6281	2.09866	3.53591	2.27138	1.88324	3.58634	1.89545	2.30397	3.40462	yes
Dm_00012307-RA	CASP	CCAAT-displacement protein alternatively spliced product	protein.targeting.secretory pathway.golgi	AT3G18480	(at3g18480 : 192.0) This gene is predicted to encode a protein that functions as a Golgi apparatus structural component, known as a golgin in mammals and yeast. A fluorescently-tagged version of CASP co-localizes with Golgi markers, and this localization appears to require the C-terminal (565Ã±689aa) portion of the protein. The protein is inserted into a membrane in a type II orientation.; CCAAT-…	NA	6.28833	10.7065	8.11423	11.6228	9.67947	6.72741	47.8047	2.15488	2.83811	2.55576	2.30175	2.90101	2.03486	2.33965	3.41798	yes
Dm_00014514-RA		Root hair defective 3 GTP-binding protein (RHD3)	development.unspecified	AT1G72960	(at1g72960 : 548.0) Root hair defective 3 GTP-binding protein (RHD3); CONTAINS InterPro DOMAIN/s: Root hair defective 3 GTP-binding (InterPro:IPR008803); BEST Arabidopsis thaliana protein match is: Root hair defective 3 GTP-binding protein (RHD3) (TAIR:AT3G13870.1); Has 479 Blast hits to 469 proteins in 183 species: Archae - 0; Bacteria - 2; Metazoa - 24; Fungi - 185; Plants - 127; Viruses - 0; O…	NA	47.0194	39.483	52.3708	69.4732	47.9915	34.0909	257.851	2.70639	2.91938	2.29855	2.42441	2.45206	1.89198	2.34711	3.43549	yes
Dm_00005218-RA	FAB1B	phosphatidylinositol-4-phosphate 5-kinase family protein	signalling.phosphinositides.phosphatidylinositol-4-phosphate 5-kinase	AT3G14270	(at3g14270 : 320.0) Encodes a protein that is predicted to act as a 1-phosphatidylinositol-3-phosphate (PtdIns3P) 5-kinase based on its homology to Fab1 from yeast. It contains an FYVE domain required for binding to PtdIns3P-containing membranes in yeast, as well as a Cpn60_TCP1 homology domain plus a kinase domain. fab1a/fab1b pollen grains not viable and have defective vacuolar organization.; F…	NA	1.46781	6.9747	21.6693	15.8632	17.7312	1.80719	49.0137	2.81105	4.76135	1.17549	1.46604	5.03667	1.62646	2.21107	3.43551	yes
Dm_00004299-RA		vacuolar protein sorting-associated protein, putative (DUF1162)	not assigned.unknown	AT5G24740	(at5g24740 : 796.0) EXPRESSED IN: 22 plant structures; EXPRESSED DURING: 13 growth stages; BEST Arabidopsis thaliana protein match is: calcium-dependent lipid-binding family protein (TAIR:AT1G48090.1). & (loc_os08g02350.1 : 447.0) no description available & (reliability: 1592.0) & (original description: transcript offset:0 AED:0.26 eAED:0.31 QI:0|0|0|0.46|0.85|0.93|15|0|1582)	NA	1.90349	3.97165	8.72456	6.42242	6.93136	1.97776	24.8516	2.64451	3.64892	1.50831	1.84135	3.69636	1.95205	2.29523	3.43562	yes
Dm_00008262-RA		B-block binding subunit of TFIIIC	RNA.regulation of transcription.putative transcription regulator	AT1G17450	(at1g17450 : 318.0) B-block binding subunit of TFIIIC; FUNCTIONS IN: molecular_function unknown; CONTAINS InterPro DOMAIN/s: B-block binding subunit of TFIIIC (InterPro:IPR007309); BEST Arabidopsis thaliana protein match is: B-block binding subunit of TFIIIC (TAIR:AT1G59453.1). & (loc_os02g42200.3 : 246.0) no description available & (reliability: 580.0) & (original description: transcript offset:…	NA	1.32076	3.88722	5.98549	5.31232	5.851	2.01732	20.4237	2.38832	3.32901	1.76762	1.80116	3.92398	1.93986	2.31027	3.44345	yes
Dm_00002527-RA	NA	NA	not assigned.unknown	NA	no hits & (original description: transcript offset:0 AED:0.65 eAED:0.89 QI:0|0|0|1|0|0.5|2|0|123)	NA	9.213	11.9853	13.592	13.8331	9.69998	9.76355	60.4512	2.33247	2.64188	2.13347	2.64418	2.7161	2.11729	2.3562	3.44455	yes
Dm_00008597-RA	GSL10	glucan synthase-like 10	minor CHO metabolism.callose	AT3G07160	(at3g07160 : 409.0) Encodes GSL10, a member of the Glucan Synthase-Like (GSL) family believed to be involved in the synthesis of the cell wall component callose. GSL10 is required for male gametophyte development and plant growth. Has a role in entry of microspores into mitosis. GSL10 mutation leads to perturbation of microspore division symmetry, irregular callose deposition and failure of gener…	NA	13.4494	33.7658	28.8902	40.7426	30.8563	5.69406	126.228	1.90105	4.47664	2.1259	2.0311	3.22699	1.63045	2.30537	3.45283	yes
Dm_00000015-RA	NA	NA	not assigned.unknown	NA	no hits & (original description: transcript offset:0 AED:0.50 eAED:0.50 QI:0|0|0|1|1|0.5|2|0|44)	NA	6.61489	3.58946	7.241	12.8393	8.44114	12.067	43.1116	3.57808	1.83246	2.52332	2.36947	2.73257	1.74998	2.33563	3.45875	yes
Dm_00004015-RA	NERD	GW repeat- and PHD finger-containing protein NERD	RNA.regulation of transcription.PHD finger transcription factor	AT2G16485	(loc_os09g36090.1 : 437.0) no description available & (at2g16485 : 390.0) nucleic acid binding;zinc ion binding;DNA binding; FUNCTIONS IN: DNA binding, zinc ion binding, nucleic acid binding; INVOLVED IN: histone modification, transcription initiation; LOCATED IN: nucleus; EXPRESSED IN: guard cell, cultured cell; CONTAINS InterPro DOMAIN/s: Zinc finger, CCCH-type (InterPro:IPR000571), Zinc finger…	NA	4.45764	8.62576	13.2475	11.7619	12.0686	5.08068	46.8	2.43799	3.2028	1.81935	1.95268	3.38912	1.98983	2.33579	3.46037	yes
Dm_00002152-RA	SMC6A	structural maintenance of chromosomes 6A	cell.division	AT5G07660	(at5g07660 : 347.0) Encodes SMC6A (STRUCTURAL MAINTENANCE OF CHROMOSOMES 6A), a component of the SMC5/6 complex. SMC5/6 complex promotes sister chromatid alignment and homologous recombination after DNA damage.; structural maintenance of chromosomes 6A (SMC6A); FUNCTIONS IN: two-component sensor activity, ATP binding; INVOLVED IN: sister chromatid cohesion, chromosome segregation, response to X-r…	NA	5.9058	12.9104	13.1876	12.4922	10.5096	7.1907	53.5304	2.0497	2.88811	2.02069	2.34365	3.16867	2.09403	2.35366	3.46595	yes
Dm_00011753-RA	LBA1	RNA helicase	RNA.processing.RNA helicase	AT5G47010	(at5g47010 : 153.0) Required for nonsense-mediated mRNA decay. Involved in RNA interference. lba1 mutants has reduced sugar-induced expression of Atb- amylase, is hypersensitive to glucose and abscisic acid and resistant to mannose, and shows early flowering, short day-sensitive growth, and seed germination phenotypes.; LOW-LEVEL BETA-AMYLASE 1 (LBA1); FUNCTIONS IN: in 6 functions; INVOLVED IN: s…	NA	6.91222	17.1154	20.4781	18.9989	15.1919	4.90026	69.2895	2.01433	3.80918	1.75592	2.18432	3.32521	1.86104	2.3255	3.46725	yes
Dm_00010159-RA		RNA-binding (RRM/RBD/RNP motifs) family protein	RNA.RNA binding	AT2G44710	(loc_os04g45930.3 : 95.9) no description available & (at2g44710 : 90.9) RNA-binding (RRM/RBD/RNP motifs) family protein; FUNCTIONS IN: RNA binding, nucleotide binding, nucleic acid binding; EXPRESSED IN: 22 plant structures; EXPRESSED DURING: 12 growth stages; CONTAINS InterPro DOMAIN/s: RNA recognition motif, RNP-1 (InterPro:IPR000504), Nucleotide-binding, alpha-beta plait (InterPro:IPR012677); …	NA	37.9372	108.85	84.1794	88.6742	81.184	44.865	377.002	1.79185	3.07017	2.16295	2.21491	3.30842	2.08815	2.34814	3.47391	yes
Dm_00013672-RA	LINC1	little nuclei1	not assigned.no ontology	AT1G67230	(at1g67230 : 548.0) Encodes a nuclear coiled-coil protein related to the carrot peripheral nuclear protein NMCP1 that is involved in the determination of plant nuclear structure.; LITTLE NUCLEI1 (LINC1); FUNCTIONS IN: molecular_function unknown; INVOLVED IN: nucleus organization; LOCATED IN: cytosol, nucleus; EXPRESSED IN: 25 plant structures; EXPRESSED DURING: 13 growth stages; BEST Arabidopsis …	NA	28.61	62.1736	38.606	43.4075	50.0546	28.6455	214.949	1.78934	2.90755	2.47685	2.10217	2.90857	2.30753	2.35868	3.4764	yes
Dm_00013305-RA		proline-tRNA ligase (DUF1680)	not assigned.unknown	AT5G12950	(at5g12950 : 756.0) FUNCTIONS IN: catalytic activity; LOCATED IN: vacuole, plant-type cell wall; EXPRESSED IN: stem, male gametophyte, guard cell, pollen tube; EXPRESSED DURING: L mature pollen stage, M germinated pollen stage; CONTAINS InterPro DOMAIN/s: Protein of unknown function DUF1680 (InterPro:IPR012878), Six-hairpin glycosidase-like (InterPro:IPR008928); BEST Arabidopsis thaliana protein …	NA	18.4328	45.5826	121.61	82.5227	134.303	19.1243	319.21	2.80754	4.06194	1.39203	1.24872	4.10907	1.95122	2.26695	3.48151	yes
Dm_00014288-RA	NRPA2	nuclear RNA polymerase A2	RNA.transcription	AT1G29940	(at1g29940 : 253.0) Encodes a subunit of RNA polymerase 1 (aka RNA polymerase A).; nuclear RNA polymerase A2 (NRPA2); FUNCTIONS IN: DNA-directed RNA polymerase activity, ribonucleoside binding, DNA binding; INVOLVED IN: transcription; LOCATED IN: nucleus; EXPRESSED IN: 22 plant structures; EXPRESSED DURING: 13 growth stages; CONTAINS InterPro DOMAIN/s: DNA-directed RNA polymerase, subunit 2, doma…	NA	19.8287	29.4948	46.6103	40.4385	37.8629	17.9545	161.941	2.45568	3.17181	1.7952	2.09516	3.0239	2.00132	2.35319	3.482	yes
Dm_00006639-RA		Protein kinase superfamily protein	protein.postranslational modification.kinase.receptor like cytoplasmatic kinase VII	AT5G18610	(at5g18610 : 265.0) Protein kinase superfamily protein; FUNCTIONS IN: protein serine/threonine kinase activity, protein kinase activity, kinase activity, ATP binding; INVOLVED IN: protein amino acid phosphorylation; CONTAINS InterPro DOMAIN/s: Protein kinase, ATP binding site (InterPro:IPR017441), Protein kinase, catalytic domain (InterPro:IPR000719), Serine/threonine-protein kinase-like domain (…	NA	24.4254	17.8905	18.2507	31.1909	21.2991	22.7231	116.452	2.70257	2.35639	2.66015	2.44839	2.25045	1.90424	2.37272	3.48774	yes
Dm_00006345-RA		transcription factor jumonji (jmjC) domain-containing protein	RNA.regulation of transcription.JUMONJI family	AT1G63490	(at1g63490 : 848.0) transcription factor jumonji (jmjC) domain-containing protein; FUNCTIONS IN: sequence-specific DNA binding transcription factor activity; LOCATED IN: nucleus; EXPRESSED IN: 21 plant structures; EXPRESSED DURING: 14 growth stages; CONTAINS InterPro DOMAIN/s: Transcription factor jumonji/aspartyl beta-hydroxylase (InterPro:IPR003347), PLU-1-like (InterPro:IPR013637), Zinc finger…	NA	4.04282	8.75711	11.3697	11.223	11.1581	4.82402	42.4347	2.27583	3.13774	1.89842	1.92593	3.39094	1.9181	2.35357	3.49806	yes
Dm_00017222-RA	GPAT6	glycerol-3-phosphate acyltransferase 6	lipid metabolism.Phospholipid synthesis	AT2G38110	(at2g38110 : 764.0) Encodes a protein with glycerol-3-phosphate acyltransferase activity.; glycerol-3-phosphate acyltransferase 6 (GPAT6); CONTAINS InterPro DOMAIN/s: Phospholipid/glycerol acyltransferase (InterPro:IPR002123); BEST Arabidopsis thaliana protein match is: glycerol-3-phosphate acyltransferase 8 (TAIR:AT4G00400.1); Has 444 Blast hits to 431 proteins in 52 species: Archae - 0; Bacteri…	NA	0.620754	46.0655	17.1295	23.8611	33.4126	17.0137	100.868	1.13079	2.56998	2.55922	1.59491	7.36131	2.08038	2.25791	3.49853	yes
Dm_00001345-RA		Ring/U-Box superfamily protein	not assigned.unknown	AT2G27950	(at2g27950 : 233.0) Ring/U-Box superfamily protein; FUNCTIONS IN: zinc ion binding; INVOLVED IN: biological_process unknown; LOCATED IN: chloroplast; CONTAINS InterPro DOMAIN/s: Zinc finger, RING-type (InterPro:IPR001841); BEST Arabidopsis thaliana protein match is: RING/U-box superfamily protein (TAIR:AT5G04460.3); Has 608 Blast hits to 493 proteins in 135 species: Archae - 2; Bacteria - 207; Me…	NA	13.1646	13.3821	10.4207	22.2981	15.6479	13.9962	75.0975	2.48725	2.42167	2.84694	2.26085	2.5098	1.74987	2.37356	3.50048	yes
Dm_00014079-RA	NA	NA	not assigned.unknown	NA	no hits & (original description: transcript offset:0 AED:0.47 eAED:0.47 QI:0|0|0|0.5|0|0.5|2|0|97)	NA	3.33797	5.67088	6.22381	3.15623	6.64087	2.98628	23.1309	2.02052	2.94016	1.87745	1.79475	2.78477	2.85884	2.36595	3.51077	yes
Dm_00009936-RA	B160	protein B160	RNA.regulation of transcription.unclassified	AT4G21430	(at4g21430 : 135.0) B160; FUNCTIONS IN: sequence-specific DNA binding transcription factor activity, zinc ion binding; INVOLVED IN: biological_process unknown; LOCATED IN: cellular_component unknown; EXPRESSED IN: 22 plant structures; EXPRESSED DURING: 13 growth stages; CONTAINS InterPro DOMAIN/s: Transcription factor jumonji/aspartyl beta-hydroxylase (InterPro:IPR003347), Zinc finger, RING-type …	NA	7.87729	17.283	9.87937	10.92	8.32929	8.74736	52.4557	1.59928	2.58288	2.41312	2.65661	2.73688	2.26125	2.37219	3.51081	yes
Dm_00001919-RA		Tetratricopeptide repeat (TPR)-like superfamily protein	DNA.repair	AT5G28740	(at5g28740 : 1265.0) Tetratricopeptide repeat (TPR)-like superfamily protein; FUNCTIONS IN: binding; INVOLVED IN: RNA processing; LOCATED IN: intracellular; EXPRESSED IN: 23 plant structures; EXPRESSED DURING: 13 growth stages; CONTAINS InterPro DOMAIN/s: RNA-processing protein, HAT helix (InterPro:IPR003107), Tetratricopeptide-like helical (InterPro:IPR011990), Tetratricopeptide repeat-containin…	NA	10.0186	9.15094	14.4378	13.7967	15.3288	13.6073	64.2743	2.81169	2.23905	2.15448	2.06667	2.68017	2.21893	2.38471	3.51414	yes
Dm_00009678-RA		BPS1-like protein	not assigned.unknown	AT1G22030	(at1g22030 : 173.0) CONTAINS InterPro DOMAIN/s: Protein BYPASS related (InterPro:IPR008511); BEST Arabidopsis thaliana protein match is: unknown protein (TAIR:AT1G77855.1); Has 99 Blast hits to 99 proteins in 17 species: Archae - 0; Bacteria - 0; Metazoa - 3; Fungi - 0; Plants - 96; Viruses - 0; Other Eukaryotes - 0 (source: NCBI BLink). & (loc_os02g34710.1 : 124.0) no description available & (re…	NA	22.4782	11.3443	19.0558	54.8924	32.0189	60.0052	155.084	3.77587	1.36875	3.03632	2.27746	2.79041	1.49924	2.32256	3.51684	yes
Dm_00011346-RA	SCD1	stomatal cytokinesis defective / SCD1 protein (SCD1)	cell.division	AT1G49040	(loc_os01g39380.3 : 156.0) no description available & (at1g49040 : 152.0) Encodes soluble protein containing N-terminal DENN domain and eight C-terminal WD-40 repeats. Involved in cytokinesis of guard mother cells and leaf epidermal cells. The overall growth and development of mutant plants is severely affected, they are smaller than wt, with defects in seedling development, leaf expansion and fl…	NA	9.06336	16.3439	15.7634	21.6588	16.1672	7.07027	70.2322	2.10088	3.29824	2.14941	2.11468	2.93876	1.68983	2.36695	3.52106	yes
Dm_00006275-RA	FAB1D	FORMS APLOID AND BINUCLEATE CELLS 1A	signalling.phosphinositides.phosphatidylinositol-4-phosphate 5-kinase	AT1G34260	(at1g34260 : 1048.0) Encodes a protein that is predicted to act as a phosphatidylinositol-3P 5-kinase, but, because it lacks a FYVE domain, it is unlikely to be efficiently targeted to membranes containing the porposed phosphatidylinositol-3P substrate. Therefore, its molecular function remains unknown.; FORMS APLOID AND BINUCLEATE CELLS 1A (FAB1D); FUNCTIONS IN: 1-phosphatidylinositol-4-phosphat…	NA	19.5168	21.5546	54.7352	65.6838	43.6156	46.9108	202.201	3.22955	2.10758	1.88506	2.2127	3.37207	1.62191	2.35773	3.52532	yes
Dm_00008016-RA		Tetratricopeptide repeat (TPR)-like superfamily protein	not assigned.unknown	AT4G32820	(at4g32820 : 1287.0) Tetratricopeptide repeat (TPR)-like superfamily protein; FUNCTIONS IN: binding; INVOLVED IN: biological_process unknown; LOCATED IN: cellular_component unknown; CONTAINS InterPro DOMAIN/s: Tetratricopeptide-like helical (InterPro:IPR011990), Tetratricopeptide repeat-containing (InterPro:IPR013026); Has 168 Blast hits to 155 proteins in 63 species: Archae - 8; Bacteria - 15; M…	NA	9.30951	11.0027	14.2698	16.6592	14.2014	6.38194	58.6807	2.41438	3.20053	2.03863	2.04632	2.65455	1.81601	2.38043	3.53358	yes
Dm_00019070-RA		zinc finger CCCH domain protein	not assigned.unknown	AT5G08450	(at5g08450 : 220.0) FUNCTIONS IN: molecular_function unknown; INVOLVED IN: biological_process unknown; LOCATED IN: cellular_component unknown; EXPRESSED IN: 25 plant structures; EXPRESSED DURING: 15 growth stages; CONTAINS InterPro DOMAIN/s: Histone deacetylation protein Rxt3 (InterPro:IPR013951); Has 34444 Blast hits to 20801 proteins in 1175 species: Archae - 64; Bacteria - 2390; Metazoa - 1556…	NA	8.9272	32.5198	20.3933	23.881	23.0333	14.3996	98.8425	1.60305	2.77338	2.27357	2.09914	3.46255	2.04981	2.36969	3.53702	yes
Dm_00004148-RA	TPR15	Heat shock protein DnaJ with tetratricopeptide repeat-containing protein	stress.abiotic.heat, protein.folding	AT2G41520	(at2g41520 : 109.0) Heat shock protein DnaJ with tetratricopeptide repeat; FUNCTIONS IN: binding, heat shock protein binding; INVOLVED IN: protein folding; EXPRESSED IN: 20 plant structures; EXPRESSED DURING: 8 growth stages; CONTAINS InterPro DOMAIN/s: Tetratricopeptide TPR-1 (InterPro:IPR001440), Tetratricopeptide-like helical (InterPro:IPR011990), Heat shock protein DnaJ, N-terminal (InterPro:…	NA	3.51906	8.23153	9.18081	9.13017	9.62128	2.96049	33.6301	2.02902	3.50185	1.87302	1.80354	3.24907	1.87693	2.36525	3.54668	yes
Dm_00007633-RA		Enhancer of polycomb-like transcription factor protein	not assigned.unknown	AT4G32620	(at4g32620 : 606.0) Enhancer of polycomb-like transcription factor protein; FUNCTIONS IN: nucleic acid binding; INVOLVED IN: biological_process unknown; LOCATED IN: cellular_component unknown; EXPRESSED IN: 24 plant structures; EXPRESSED DURING: 14 growth stages; CONTAINS InterPro DOMAIN/s: Tudor domain (InterPro:IPR002999), Enhancer of polycomb-like (InterPro:IPR019542); BEST Arabidopsis thalian…	NA	5.69883	8.19037	11.6945	12.329	12.8621	4.81321	44.44	2.43882	3.20378	1.92431	1.78783	2.96019	1.84905	2.37655	3.54703	yes
Dm_00005607-RA	SFH3	SEC14-like 3	transport.misc, protein.targeting.secretory pathway.unspecified	AT2G21540	(at2g21540 : 609.0) SEC14-like 3 (SFH3); FUNCTIONS IN: phosphatidylinositol transporter activity; INVOLVED IN: flower development, transport; LOCATED IN: intracellular; EXPRESSED IN: 25 plant structures; EXPRESSED DURING: 17 growth stages; CONTAINS InterPro DOMAIN/s: Cellular retinaldehyde-binding/triple function, C-terminal (InterPro:IPR001251), Cellular retinaldehyde-binding/triple function, N-…	NA	22.6324	3.95923	3.54585	12.5889	9.49243	12.7391	48.1901	3.60307	1.91871	3.77519	2.3412	1.08901	1.93459	2.32185	3.55325	yes
Dm_00005278-RA		RNA-binding (RRM/RBD/RNP motifs) family protein	RNA.RNA binding	AT2G33435	(loc_os03g04520.4 : 191.0) no description available & (at2g33435 : 186.0) RNA-binding (RRM/RBD/RNP motifs) family protein; FUNCTIONS IN: RNA binding, nucleotide binding, nucleic acid binding; INVOLVED IN: biological_process unknown; LOCATED IN: cellular_component unknown; CONTAINS InterPro DOMAIN/s: RNA recognition motif, RNP-1 (InterPro:IPR000504), Nucleotide-binding, alpha-beta plait (InterPro:…	NA	5.76482	11.8624	13.2359	11.8301	10.8979	6.45331	48.3296	2.0256	2.89998	1.864	2.14737	3.0529	2.03048	2.38893	3.55397	yes
Dm_00013094-RA	NA	NA	not assigned.unknown	NA	no hits & (original description: transcript offset:0 AED:0.75 eAED:0.75 QI:0|0|0|0.33|0|0.33|3|0|90)	NA	16.942	8.52442	12.9648	17.0359	13.3415	11.7468	64.8335	2.93194	2.46293	2.3242	2.2771	1.93601	1.93343	2.40376	3.56887	yes
Dm_00011429-RA		ATPase E1-E2 type family protein / haloacid dehalogenase-like hydrolase family protein	RNA.regulation of transcription.bZIP transcription factor family, transport.p- and v-ATPases	AT1G68710	(at1g68710 : 1745.0) ATPase E1-E2 type family protein / haloacid dehalogenase-like hydrolase family protein; FUNCTIONS IN: ATPase activity, coupled to transmembrane movement of ions, phosphorylative mechanism; INVOLVED IN: metabolic process, phospholipid transport, ATP biosynthetic process; LOCATED IN: mitochondrion, integral to membrane, membrane; EXPRESSED IN: 23 plant structures; EXPRESSED DUR…	Plant permeome.primary active transport.P-type ATPase superfamily.P4 family.phospholipid flippase complex.P4-type ATPase component ALA	6.74908	3.2678	6.84208	5.89048	11.2783	2.54138	27.894	3.09312	3.45161	2.02883	1.30354	2.04739	2.23347	2.3647	3.57322	yes
Dm_00004134-RA	EDM2	ENHANCED DOWNY MILDEW 2	RNA.regulation of transcription.putative transcription regulator	AT5G55390	(at5g55390 : 233.0) Encodes EDM2 (enhanced downy mildew 2). The predicted protein bears typical features of transcriptional regulators. EDM2 contains two putative bipartite nuclear localization signals (NLS) two zinc-finger-like motifs, a Proline-rich region and a large aspartic acid-rich region. Both zinc-finger-like stretches resemble the PHD (plant homeodomain) finger motif. Mutations in EDM2 …	NA	11.8241	17.3232	28.2913	26.9113	22.1403	7.78713	87.9462	2.34229	3.49841	1.63414	1.98834	2.88503	1.70715	2.38012	3.58138	yes
Dm_00003451-RA		Chaperone DnaJ-domain superfamily protein	not assigned.no ontology	AT4G36520	(at4g36520 : 383.0) Chaperone DnaJ-domain superfamily protein; FUNCTIONS IN: heat shock protein binding; CONTAINS InterPro DOMAIN/s: Heat shock protein DnaJ, N-terminal (InterPro:IPR001623); BEST Arabidopsis thaliana protein match is: Chaperone DnaJ-domain superfamily protein (TAIR:AT4G12770.2); Has 187564 Blast hits to 104912 proteins in 3501 species: Archae - 1251; Bacteria - 31029; Metazoa - 7…	NA	4.52278	13.5334	9.27873	11.7009	8.09445	9.53544	44.4698	1.71547	2.21962	2.26101	2.45743	3.29409	1.92385	2.39896	3.58435	yes
Dm_00007604-RA		cyclin-like protein	cell.cycle	AT1G70620	(at1g70620 : 169.0) cyclin-related; FUNCTIONS IN: molecular_function unknown; INVOLVED IN: biological_process unknown; LOCATED IN: cellular_component unknown; EXPRESSED IN: 23 plant structures; EXPRESSED DURING: 13 growth stages. & (loc_os04g56630.2 : 169.0) no description available & (reliability: 338.0) & (original description: transcript offset:0 AED:0.14 eAED:0.17 QI:0|0|0|1|1|1|6|0|674)	NA	9.41446	25.3304	35.3652	21.9731	22.868	7.74562	91.9097	1.8587	3.57007	1.37686	2.0066	3.28607	2.06392	2.36817	3.59157	yes
Dm_00008888-RA	NA	NA	not assigned.unknown	NA	no hits & (original description: transcript offset:0 AED:0.68 eAED:0.68 QI:0|-1|0|1|-1|1|1|0|120)	NA	7.39746	10.7472	13.8567	16.5001	17.4042	4.65632	53.7041	2.31508	3.52777	1.97053	1.62485	2.85754	1.69825	2.38518	3.59551	yes
Dm_00006476-RA	EMB2745	Tetratricopeptide repeat (TPR)-like superfamily protein	not assigned.no ontology.pentatricopeptide (PPR) repeat-containing protein	AT5G39710	(loc_os03g02762.1 : 155.0) no description available & (at5g39710 : 89.0) EMBRYO DEFECTIVE 2745 (EMB2745); CONTAINS InterPro DOMAIN/s: Pentatricopeptide repeat (InterPro:IPR002885); BEST Arabidopsis thaliana protein match is: Pentatricopeptide repeat (PPR) superfamily protein (TAIR:AT5G55840.1); Has 65335 Blast hits to 15466 proteins in 320 species: Archae - 6; Bacteria - 88; Metazoa - 1398; Fungi…	NA	2.34595	5.70254	8.47677	7.20794	6.4348	3.37987	25.619	2.16536	2.92049	1.59143	1.99335	3.42903	1.82442	2.38843	3.596	yes
Dm_00003065-RA	PSL4	calmodulin-binding protein	signalling.calcium	AT5G56360	(at5g56360 : 84.0) Encodes PSL4, beat-subunit of endoplasmic reticulum-resident glucosidase II, which is essential for stable accumulation and quality control of the elf18 receptor EFR but not the flg22 receptor FLS2.; PRIORITY IN SWEET LIFE 4 (PSL4); FUNCTIONS IN: calmodulin binding; INVOLVED IN: defense response to bacterium; LOCATED IN: endomembrane system; EXPRESSED IN: 23 plant structures; E…	NA	12.9524	15.343	13.9108	19.0118	15.8394	7.34633	65.6473	2.09128	3.1571	2.24812	2.05103	2.35383	1.78466	2.41447	3.60712	yes
Dm_00004873-RA		ARID/BRIGHT DNA-binding , ELM2 domain and myb-like DNA-binding domain-containing protein	RNA.regulation of transcription.putative transcription regulator	AT4G11400	(at4g11400 : 300.0) ARID/BRIGHT DNA-binding domain;ELM2 domain protein; FUNCTIONS IN: DNA binding; LOCATED IN: vacuole; CONTAINS InterPro DOMAIN/s: SANT, DNA-binding (InterPro:IPR001005), ELM2 (InterPro:IPR000949), ARID/BRIGHT DNA-binding domain (InterPro:IPR001606); BEST Arabidopsis thaliana protein match is: ARID/BRIGHT DNA-binding domain;ELM2 domain protein (TAIR:AT2G46040.1); Has 254 Blast hi…	NA	6.22689	4.52102	8.57284	8.98563	8.25565	7.17189	34.2353	2.9191	2.24857	1.99915	2.05076	2.45467	1.92561	2.41991	3.60733	yes
Dm_00006635-RA	NA	NA	not assigned.unknown	NA	no hits & (original description: transcript offset:0 AED:0.78 eAED:1.00 QI:0|0|0|0.5|1|1|2|0|96)	NA	72.384	48.5027	111.782	105.474	133.261	80.4918	425.49	3.13477	2.40296	1.93251	1.67467	2.55989	2.01041	2.40842	3.60822	yes
Dm_00015125-RA	DAYSLEEPER	BED zinc finger and hAT dimerization domain-containing protein DAYSLEEPER	DNA.unspecified	AT3G42170	(loc_os10g02910.1 : 213.0) no description available & (p08770|tra1_maize : 120.0) Putative AC transposase (ORFA) - Zea mays (Maize) & (at3g42170 : 113.0) transposase-like gene with conserved domains from the family of hAT transposases that includes hobo from Drosophila melanogaster, Activator (Ac) from maize, and Tam3 from snapdragon but lacks several amino acids known to be essential for Ac tran…	NA	0.552649	8.64334	10.9876	6.86896	10.4252	3.95326	27.6404	1.67999	2.80327	1.3278	1.40598	5.64197	2.00656	2.31197	3.62169	yes
Dm_00016250-RA		RNA-binding (RRM/RBD/RNP motifs) family protein	RNA.RNA binding	AT2G33435	(at2g33435 : 152.0) RNA-binding (RRM/RBD/RNP motifs) family protein; FUNCTIONS IN: RNA binding, nucleotide binding, nucleic acid binding; INVOLVED IN: biological_process unknown; LOCATED IN: cellular_component unknown; CONTAINS InterPro DOMAIN/s: RNA recognition motif, RNP-1 (InterPro:IPR000504), Nucleotide-binding, alpha-beta plait (InterPro:IPR012677); BEST Arabidopsis thaliana protein match is…	NA	13.7227	12.1798	18.8041	20.0138	15.1887	14.1079	72.9482	2.58029	2.36856	1.95193	2.26338	2.40343	1.86551	2.43124	3.62585	yes
Dm_00012989-RA	TTN8	Structural maintenance of chromosomes (SMC) family protein	cell.division	AT3G54670	(at3g54670 : 1258.0) Encodes a member of the Arabidopsis cohesin complex that is essential for viability and sister chromatid alignment.; TITAN8 (TTN8); CONTAINS InterPro DOMAIN/s: SMCs flexible hinge (InterPro:IPR010935), RecF/RecN/SMC protein, N-terminal (InterPro:IPR003395); BEST Arabidopsis thaliana protein match is: structural maintenance of chromosome 3 (TAIR:AT5G48600.1). & (loc_os12g44390…	NA	23.9632	45.602	42.9276	35.9958	36.9933	27.9375	164.087	1.8471	2.55426	1.93494	2.14876	2.77432	2.18832	2.42966	3.6317	yes
Dm_00016746-RA	UBP26	ubiquitin-specific protease 26	protein.degradation.ubiquitin.ubiquitin protease	AT3G49600	(at3g49600 : 659.0) Encodes a ubiquitin-specific protease which catalyzes deubiquitination of histone H2B and is required for heterochromatin silencing.Loss of function mutations display autonomous endosperm development and embryo arrest. Loss of function also results in an increase in expression of the PcG complex target gene PHE1.; ubiquitin-specific protease 26 (UBP26); FUNCTIONS IN: ubiquitin…	NA	8.66475	8.26313	8.098	10.6165	8.48377	4.87631	37.4018	2.17607	2.93727	2.19801	2.13633	2.10439	1.81315	2.43405	3.64205	yes
Dm_00003286-RA	ATM	Serine/Threonine-kinase ATM-like protein	protein.postranslational modification.kinase	AT3G48190	(at3g48190 : 382.0) encodes a homolog of the human ATM gene, which is mutated in ataxia telangiectasia, a chromosome instability disorder. Characterization of mutants suggest a role in repairing DNA in response to ionizing radiation as well as during meiosis. The protein has kinase domains and shows kinase activity in orthologs. There is also evidence that ATM might be involved in the telomerase-…	NA	3.11	5.85582	6.07225	5.69414	4.67513	2.96292	21.3942	1.86552	2.84828	1.81272	2.18788	2.773	1.90377	2.42788	3.64578	yes
Dm_00004301-RA	KCS12	3-ketoacyl-CoA synthase 12	lipid metabolism.FA synthesis and FA elongation.beta ketoacyl CoA synthase	AT2G28630	(at2g28630 : 622.0) Encodes KCS12, a member of the 3-ketoacyl-CoA synthase family involved in the biosynthesis of VLCFA (very long chain fatty acids).; 3-ketoacyl-CoA synthase 12 (KCS12); FUNCTIONS IN: transferase activity, transferring acyl groups other than amino-acyl groups, catalytic activity, acyltransferase activity; INVOLVED IN: response to osmotic stress; LOCATED IN: endoplasmic reticulum…	NA	6.02913	18.458	7.25118	5.31554	5.94831	12.2651	39.5365	1.097	1.68828	2.44621	2.72548	2.7187	2.89012	2.38765	3.64941	yes
Dm_00001302-RA	HUA2	Tudor/PWWP/MBT domain-containing protein	RNA.regulation of transcription.PWWP domain protein	AT5G23150	(at5g23150 : 185.0) Putative transcription factor. Member of the floral homeotic AGAMOUS pathway.Mutations in HUA enhance the phenotype of mild ag-4 allele. Single hua mutants are early flowering and have reduced levels of FLC mRNA. Other MADS box flowering time genes such as FLM and MAF2 also appear to be regulated by HUA2. HUA2 normally activates FLC expression and enhances AG function.; ENHANC…	NA	2.699	5.49745	7.43817	6.13581	6.56233	2.66127	22.7752	2.04865	3.09724	1.6144	1.79345	3.07248	1.88916	2.41507	3.65439	yes
Dm_00009802-RA		Pentatricopeptide repeat (PPR) superfamily protein	not assigned.no ontology.pentatricopeptide (PPR) repeat-containing protein	AT2G17525	(at2g17525 : 705.0) Pentatricopeptide repeat (PPR) superfamily protein; CONTAINS InterPro DOMAIN/s: Pentatricopeptide repeat (InterPro:IPR002885); BEST Arabidopsis thaliana protein match is: Pentatricopeptide repeat (PPR) superfamily protein (TAIR:AT1G74580.1); Has 30201 Blast hits to 17322 proteins in 780 species: Archae - 12; Bacteria - 1396; Metazoa - 17338; Fungi - 3422; Plants - 5037; Viruse…	NA	2.46769	10.4109	15.2848	9.07459	9.50665	4.53523	36.3111	1.80062	3.00025	1.24553	1.93283	3.86875	1.99797	2.3842	3.65458	yes
Dm_00018810-RA	ATG2	autophagy 2	not assigned.unknown	AT3G19190	(at3g19190 : 771.0) Encodes autophagy-related 2 (ATG2).; AUTOPHAGY 2 (ATG2); CONTAINS InterPro DOMAIN/s: autophagy-related, C-terminal (InterPro:IPR015412); Has 828 Blast hits to 713 proteins in 221 species: Archae - 0; Bacteria - 44; Metazoa - 384; Fungi - 228; Plants - 88; Viruses - 0; Other Eukaryotes - 84 (source: NCBI BLink). & (loc_os06g15700.1 : 579.0) no description available & (reliabili…	NA	4.44956	6.58666	9.92606	7.61802	8.36787	2.86051	29.2313	2.14884	3.35486	1.55735	1.80318	2.71065	1.93865	2.4158	3.65572	yes
Dm_00008359-RA	NA	NA	not assigned.unknown	NA	no hits & (original description: transcript offset:0 AED:0.16 eAED:0.16 QI:0|0|0|1|1|1|2|0|239)	NA	0.302773	6.60233	3.199	9.7055	10.1002	4.79292	22.2175	1.75277	2.19922	2.80432	1.14207	6.16224	1.19993	2.3067	3.65625	yes
Dm_00013178-RA		NB-ARC domain-containing disease resistance protein	stress.biotic	AT3G14470	(loc_os08g12740.2 : 312.0) no description available & (at3g14470 : 229.0) NB-ARC domain-containing disease resistance protein; FUNCTIONS IN: protein binding; INVOLVED IN: apoptosis, defense response; LOCATED IN: endomembrane system; EXPRESSED IN: 23 plant structures; EXPRESSED DURING: 14 growth stages; CONTAINS InterPro DOMAIN/s: Leucine-rich repeat-containing protein (InterPro:IPR015766), NB-ARC…	NA	4.4853	19.2934	37.7045	31.1328	28.758	3.53218	82.0956	2.08875	4.53863	1.12228	1.51292	4.195	1.39861	2.32241	3.65668	yes
Dm_00000188-RA	NA	NA	not assigned.unknown	NA	no hits & (original description: transcript offset:0 AED:0.60 eAED:0.60 QI:0|0|0|0.33|1|1|3|0|107)	NA	9.9197	24.9589	63.1678	41.485	56.4348	11.0748	138.535	2.469	3.64034	1.13093	1.29367	3.79013	1.74009	2.35084	3.66959	yes
Dm_00004449-RA		NB-ARC domain-containing disease resistance protein	stress.biotic, stress.biotic.PR-proteins	AT3G14470	(loc_os05g31570.1 : 373.0) no description available & (at3g14470 : 286.0) NB-ARC domain-containing disease resistance protein; FUNCTIONS IN: protein binding; INVOLVED IN: apoptosis, defense response; LOCATED IN: endomembrane system; EXPRESSED IN: 23 plant structures; EXPRESSED DURING: 14 growth stages; CONTAINS InterPro DOMAIN/s: Leucine-rich repeat-containing protein (InterPro:IPR015766), NB-ARC…	NA	4.42398	19.8548	15.392	17.2306	18.1738	3.77221	54.2878	1.45062	3.84835	1.81726	1.57775	3.6095	1.6552	2.37983	3.67402	yes
Dm_00010031-RA	ATMIN7	HOPM interactor 7	signalling.G-proteins	AT3G43300	(at3g43300 : 1412.0) AtMIN7 is an immunity associated Arabidopsis protein targeted by HopM1, a conserved Pseudomonas syringae virulence protein. AtMIN7 encodes one of the eight members of the Arabidopsis adenosine diphosphate (ADP) ribosylation factor (ARF) guanine nucleotide exchange factor (GEF) protein family. The AFR GEF proteins are key components of the vesicle trafficking system in eukaryo…	NA	16.6699	28.3658	22.3075	33.4369	26.0093	8.83951	98.1668	1.79041	3.4709	2.13694	1.91553	2.55587	1.55306	2.42232	3.67426	yes
Dm_00006057-RA		transcription regulator	RNA.regulation of transcription.putative transcription regulator	AT1G02080	(at1g02080 : 709.0) transcription regulators; FUNCTIONS IN: transcription regulator activity; EXPRESSED IN: 25 plant structures; EXPRESSED DURING: 15 growth stages; CONTAINS InterPro DOMAIN/s: CCR4-Not complex component, Not1 (InterPro:IPR007196). & (loc_os10g40780.1 : 610.0) no description available & (chl4|515656 : 322.0) no description available & (reliability: 1418.0) & (original description:…	NA	7.23593	14.7558	22.6432	17.3166	17.9051	5.32938	59.8734	2.01969	3.48984	1.40126	1.74123	3.04345	1.78877	2.41009	3.68674	yes
Dm_00008151-RA		Duplicated homeodomain-like superfamily protein	RNA.regulation of transcription.MYB domain transcription factor family	AT3G52250	(at3g52250 : 155.0) Encodes a protein with a putative role in mRNA splicing.; Duplicated homeodomain-like superfamily protein; FUNCTIONS IN: DNA binding, sequence-specific DNA binding transcription factor activity; INVOLVED IN: RNA splicing; CONTAINS InterPro DOMAIN/s: SANT, DNA-binding (InterPro:IPR001005), Myb, DNA-binding (InterPro:IPR014778), Homeodomain-like (InterPro:IPR009057), SANT, eukar…	NA	2.6082	6.11002	7.78982	8.71797	9.09105	2.51455	25.7507	2.07286	3.35306	1.72172	1.49992	3.30646	1.56183	2.40688	3.68802	yes
Dm_00005533-RA		PHD finger family protein	RNA.regulation of transcription.putative transcription regulator	AT1G77800	(at1g77800 : 340.0) PHD finger family protein; FUNCTIONS IN: zinc ion binding; EXPRESSED IN: 24 plant structures; EXPRESSED DURING: 15 growth stages; CONTAINS InterPro DOMAIN/s: Zinc finger, PHD-type, conserved site (InterPro:IPR019786), Zinc finger, PHD-type (InterPro:IPR001965), Zinc finger, FYVE/PHD-type (InterPro:IPR011011), Zinc finger, PHD-finger (InterPro:IPR019787); BEST Arabidopsis thali…	NA	4.61437	11.9802	19.5424	14.594	15.097	6.04745	50.3672	2.0704	3.05548	1.36474	1.73713	3.44593	1.7843	2.41007	3.68926	yes
Dm_00005426-RA		CELLULOSE SYNTHASE INTERACTIVE 3	not assigned.no ontology.C2 domain-containing protein	AT1G77460	(at1g77460 : 2019.0) Armadillo/beta-catenin-like repeat ; C2 calcium/lipid-binding domain (CaLB) protein; FUNCTIONS IN: binding; INVOLVED IN: biological_process unknown; LOCATED IN: cellular_component unknown; EXPRESSED IN: 21 plant structures; EXPRESSED DURING: 13 growth stages; CONTAINS InterPro DOMAIN/s: C2 membrane targeting protein (InterPro:IPR018029), Armadillo-like helical (InterPro:IPR01…	NA	4.81251	9.03122	2.78317	6.31853	4.23218	2.53207	20.8232	1.20384	3.0371	2.89793	2.29827	2.10852	1.71956	2.41556	3.6946	yes
Dm_00008569-RA		Protein kinase superfamily protein	protein.postranslational modification	AT3G17850	(at3g17850 : 621.0) Protein kinase superfamily protein; FUNCTIONS IN: kinase activity; INVOLVED IN: protein amino acid phosphorylation; LOCATED IN: cytosol, plasma membrane; EXPRESSED IN: cultured cell; CONTAINS InterPro DOMAIN/s: Serine/threonine-protein kinase domain (InterPro:IPR002290), Serine/threonine-protein kinase-like domain (InterPro:IPR017442), AGC-kinase, C-terminal (InterPro:IPR00096…	NA	8.27831	9.57235	10.1877	13.1485	11.0982	6.1822	42.8244	2.15988	2.79319	2.06945	1.94567	2.36506	1.70119	2.45341	3.69542	yes
Dm_00011504-RA	FIP1[V]	FIP1[V]-like protein	RNA.processing.3 end processing.Fip1	AT5G58040	(at5g58040 : 448.0) Encodes a subunit of the polyadenylation apparatus that interacts with and stimulates the activity of poly(A) polymerase. Additionally , it interacts with several polyadenylation factor subunits and is an RNA-binding protein. It is suggested that this protein coordinates a number of polyadenylation factor subunits with PAP and with RNA.; homolog of yeast FIP1 [V] (FIP1[V]); FU…	NA	14.4686	21.2823	23.2013	24.137	23.3518	15.5809	89.6818	2.07473	2.52597	1.95034	1.941	2.63044	1.89303	2.45728	3.69644	yes
Dm_00017451-RA	NA	NA	not assigned.unknown	NA	no hits & (original description: transcript offset:0 AED:0.75 eAED:0.83 QI:0|0|0|0.5|0.66|0.75|4|0|109)	NA	21.2573	25.4072	27.5689	25.957	21.9991	14.8096	100.605	1.98359	2.76466	1.86109	2.19119	2.24368	1.94897	2.45836	3.69822	yes
Dm_00000552-RA		Frigida-like protein	protein.targeting.secretory pathway.unspecified	AT5G27220	(ipr012474 : 173.56139) Frigida-like & (at5g27220 : 97.4) Frigida-like protein; FUNCTIONS IN: molecular_function unknown; INVOLVED IN: biological_process unknown; LOCATED IN: cellular_component unknown; EXPRESSED IN: 24 plant structures; EXPRESSED DURING: 14 growth stages; CONTAINS InterPro DOMAIN/s: Frigida-like (InterPro:IPR012474); BEST Arabidopsis thaliana protein match is: FRIGIDA-like prote…	NA	6.51492	7.58553	9.85609	9.56334	8.92844	3.88414	33.5487	2.142	3.11437	1.76216	1.9087	2.36669	1.81319	2.44764	3.69924	yes
Dm_00008941-RA	NA	NA	not assigned.unknown	NA	no hits & (original description: transcript offset:0 AED:0.56 eAED:0.56 QI:0|0|0|0.25|0.33|0.5|4|0|176)	NA	13.4791	13.7021	21.0687	22.3279	19.9756	11.0862	73.8345	2.42481	2.72201	1.80585	1.88164	2.45819	1.72818	2.45141	3.70031	yes
Dm_00007641-RA	MEE12	maternal effect embryo arrest 12	not assigned.unknown	AT2G02955	(at2g02955 : 123.0) maternal effect embryo arrest 12 (MEE12); CONTAINS InterPro DOMAIN/s: Transcription initiation factor Rrn7 (InterPro:IPR021752); BEST Arabidopsis thaliana protein match is: unknown protein (TAIR:AT4G01335.1); Has 30201 Blast hits to 17322 proteins in 780 species: Archae - 12; Bacteria - 1396; Metazoa - 17338; Fungi - 3422; Plants - 5037; Viruses - 0; Other Eukaryotes - 2996 (s…	NA	25.2839	42.0006	47.7972	39.6428	37.2747	44.5103	172.272	2.03533	1.949	1.84888	2.20579	2.75859	2.11954	2.46288	3.70953	yes
Dm_00004380-RA	IYO	RPAP1-like, carboxy-terminal protein	not assigned.unknown	AT4G38440	(at4g38440 : 856.0) LOCATED IN: chloroplast; EXPRESSED IN: 21 plant structures; EXPRESSED DURING: 12 growth stages; CONTAINS InterPro DOMAIN/s: RNA polymerase II-associated protein 1, C-terminal (InterPro:IPR013929), RNA polymerase II-associated protein 1, N-terminal (InterPro:IPR013930); Has 276 Blast hits to 220 proteins in 102 species: Archae - 0; Bacteria - 2; Metazoa - 151; Fungi - 65; Plant…	NA	13.0222	10.8506	12.1297	16.9079	12.5394	11.2392	55.9564	2.36564	2.31547	2.20423	2.15638	2.10105	1.72594	2.46727	3.71247	yes
Dm_00008541-RA	NA	NA	not assigned.unknown	NA	no hits & (original description: transcript offset:0 AED:0.50 eAED:0.62 QI:0|0|0|0.5|0|1|2|0|231)	NA	3.3921	6.33959	7.85259	9.00495	8.29648	3.2881	26.8311	2.07736	3.04739	1.7582	1.68843	2.98112	1.56976	2.43697	3.71362	yes
Dm_00016900-RA		transcriptional regulator	not assigned.unknown	AT4G31880	(at4g31880 : 232.0) LOCATED IN: cytosol; EXPRESSED IN: 24 plant structures; EXPRESSED DURING: 14 growth stages; BEST Arabidopsis thaliana protein match is: Tudor/PWWP/MBT superfamily protein (TAIR:AT1G15940.1). & (loc_os04g42320.1 : 177.0) no description available & (reliability: 464.0) & (original description: transcript offset:0 AED:0.30 eAED:0.32 QI:0|0|0|0.33|0.92|0.93|15|0|1273)	NA	12.1074	24.7462	24.3919	24.0901	23.5054	10.157	84.1015	1.76452	3.04964	1.78487	1.83842	2.79295	1.80332	2.44749	3.71947	yes
Dm_00008459-RA	Phox1	Octicosapeptide/Phox/Bem1p (PB1) domain-containing protein / tetratricopeptide repeat (TPR)-containing protein	RNA.processing	AT2G25290	(at2g25290 : 558.0) Octicosapeptide/Phox/Bem1p (PB1) domain-containing protein / tetratricopeptide repeat (TPR)-containing protein; FUNCTIONS IN: binding; INVOLVED IN: biological_process unknown; LOCATED IN: cellular_component unknown; CONTAINS InterPro DOMAIN/s: Octicosapeptide/Phox/Bem1p (InterPro:IPR000270), Tetratricopeptide-like helical (InterPro:IPR011990), Tetratricopeptide repeat-containi…	NA	3.7293	6.10157	9.36808	9.80042	13.8339	8.39852	35.8079	2.55334	2.08706	1.93485	1.37263	3.2657	1.86697	2.43881	3.72021	yes
Dm_00002336-RA		Phox (PX) domain-containing protein	signalling.lipids	AT4G32160	(at4g32160 : 179.0) Phox (PX) domain-containing protein; CONTAINS InterPro DOMAIN/s: Phox-like (InterPro:IPR001683); BEST Arabidopsis thaliana protein match is: Phox (PX) domain-containing protein (TAIR:AT2G25350.1); Has 33521 Blast hits to 21186 proteins in 1483 species: Archae - 481; Bacteria - 3615; Metazoa - 17372; Fungi - 2745; Plants - 1628; Viruses - 165; Other Eukaryotes - 7515 (source: N…	NA	8.50671	10.3355	18.316	17.7006	15.1075	11.0599	57.6533	2.47888	2.3736	1.65802	1.92196	2.7391	1.69885	2.45683	3.72311	yes
Dm_00014287-RA	NRPA2	nuclear RNA polymerase A2	RNA.transcription	AT1G29940	(at1g29940 : 109.0) Encodes a subunit of RNA polymerase 1 (aka RNA polymerase A).; nuclear RNA polymerase A2 (NRPA2); FUNCTIONS IN: DNA-directed RNA polymerase activity, ribonucleoside binding, DNA binding; INVOLVED IN: transcription; LOCATED IN: nucleus; EXPRESSED IN: 22 plant structures; EXPRESSED DURING: 13 growth stages; CONTAINS InterPro DOMAIN/s: DNA-directed RNA polymerase, subunit 2, doma…	NA	4.68786	9.18758	11.6119	12.5475	11.1369	4.33422	37.115	2.01073	3.08819	1.66609	1.73066	2.9483	1.55388	2.43952	3.72736	yes
Dm_00013649-RA	NA	NA	not assigned.unknown	NA	no hits & (original description: transcript offset:0 AED:0.82 eAED:0.82 QI:0|0|0|0.5|1|1|2|0|415)	NA	16.2665	23.3904	24.0374	22.5813	19.6463	11.8438	84.1759	1.84589	2.82516	1.80801	2.09645	2.37256	1.89683	2.46512	3.72758	yes
Dm_00016206-RA	NA	NA	not assigned.unknown	NA	no hits & (original description: transcript offset:0 AED:0.61 eAED:0.62 QI:0|0|0|0.66|0.5|0.66|3|0|384)	NA	8.92751	10.0657	8.07328	9.53889	7.38683	6.05539	36.0625	1.83832	2.57259	2.16083	2.28291	2.00201	1.92154	2.47194	3.72762	yes
Dm_00010504-RA	HUA2	Tudor/PWWP/MBT domain-containing protein	RNA.regulation of transcription.PWWP domain protein	AT5G23150	(at5g23150 : 521.0) Putative transcription factor. Member of the floral homeotic AGAMOUS pathway.Mutations in HUA enhance the phenotype of mild ag-4 allele. Single hua mutants are early flowering and have reduced levels of FLC mRNA. Other MADS box flowering time genes such as FLM and MAF2 also appear to be regulated by HUA2. HUA2 normally activates FLC expression and enhances AG function.; ENHANC…	NA	5.12368	9.71358	11.227	10.7281	12.1915	3.06753	35.662	1.87511	3.53533	1.66285	1.54758	2.79116	1.73106	2.43409	3.7325	yes
Dm_00008759-RA	CAX9	cation exchanger 9	transport.calcium, transport.unspecified cations	AT3G14070	(at3g14070 : 528.0) Involved in cation (K, Na and Mn) homeostasis and transport; cation exchanger 9 (CAX9); CONTAINS InterPro DOMAIN/s: Sodium/calcium exchanger membrane region (InterPro:IPR004837); BEST Arabidopsis thaliana protein match is: cation calcium exchanger 4 (TAIR:AT1G54115.1); Has 3863 Blast hits to 3216 proteins in 856 species: Archae - 67; Bacteria - 789; Metazoa - 1939; Fungi - 299…	Plant permeome.carrier-mediated transport.CDF superfamily.CaCA family.CCX cation:calcium cation exchanger.	9.86409	8.42398	5.91473	16.3453	9.59717	10.452	42.4911	2.33178	2.02396	2.8429	2.14225	2.10366	1.37719	2.45776	3.73641	yes
Dm_00008485-RA	ABCD1	peroxisomal ABC transporter 1	transport.ABC transporters and multidrug resistance systems	AT4G39850	(at4g39850 : 1397.0) Encodes a peroxisomal protein of the ATP binding cassette (ABC) transporter class (PMP subfamily) with significant identity to the human X-linked adrenoleukodystrophy protein (ALDP). The gene product promotes germination and represses embryo dormancy. ABI3, ABA1, FUS3 and LEC1 are epistatic to this gene. Mutants accumulate fatty acyl CoA suggesting a defect in uptake of fatty…	Plant permeome.primary active transport.ABC superfamily.ABC-D group.PMP subfamily D transporter.	14.87	18.4421	46.3418	43.1245	52.6731	12.6586	123.758	2.74587	3.28952	1.41628	1.23177	3.054	1.52047	2.40413	3.73754	yes
Dm_00003930-RA		hypothetical protein	not assigned.unknown	AT3G50370	(at3g50370 : 932.0) unknown protein; FUNCTIONS IN: molecular_function unknown; INVOLVED IN: biological_process unknown; LOCATED IN: cellular_component unknown; EXPRESSED IN: 26 plant structures; EXPRESSED DURING: 15 growth stages; Has 27734 Blast hits to 16708 proteins in 1259 species: Archae - 81; Bacteria - 3434; Metazoa - 10876; Fungi - 2514; Plants - 987; Viruses - 212; Other Eukaryotes - 963…	NA	15.9875	19.4034	21.0554	24.8193	23.762	14.2033	84.6732	2.12528	2.57537	2.0072	1.83299	2.40425	1.77	2.47462	3.74253	yes
Dm_00006428-RA	LINC4	little nuclei4	Co-factor and vitamine metabolism.pantothenate.branched-chain amino acid aminotransferase, amino acid metabolism.synthesis.branched chain group.common.branched-chain amino acid aminotransferase	AT5G65770	(at5g65770 : 561.0) LITTLE NUCLEI4 (LINC4); EXPRESSED IN: 23 plant structures; EXPRESSED DURING: 13 growth stages; BEST Arabidopsis thaliana protein match is: branched-chain amino acid aminotransferase 5 / branched-chain amino acid transaminase 5 (BCAT5) (TAIR:AT5G65780.2). & (loc_os01g56140.1 : 434.0) no description available & (reliability: 1092.0) & (original description: transcript offset:0 A…	NA	18.1114	20.1772	25.5527	26.2497	25.7355	14.4351	91.6253	2.18224	2.66507	1.84083	1.83102	2.33677	1.80285	2.47687	3.75287	yes
Dm_00009403-RA	NA	NA	not assigned.unknown	NA	no hits & (original description: transcript offset:0 AED:0.79 eAED:0.79 QI:0|0|0|0.5|1|1|4|0|106)	NA	33.8884	65.7465	127.676	101.416	92.1358	42.3812	310.554	2.23847	2.87501	1.28102	1.75203	3.19141	1.61199	2.43669	3.75381	yes
Dm_00019888-RA		TATA box-binding protein associated factor RNA polymerase I subunit C	not assigned.unknown	AT3G18310	(at3g18310 : 481.0) unknown protein; Has 30 Blast hits to 30 proteins in 10 species: Archae - 0; Bacteria - 0; Metazoa - 0; Fungi - 0; Plants - 30; Viruses - 0; Other Eukaryotes - 0 (source: NCBI BLink). & (loc_os03g13720.1 : 311.0) no description available & (reliability: 962.0) & (original description: transcript offset:0 AED:0.00 eAED:0.01 QI:0|-1|0|1|-1|1|1|0|918)	NA	4.3569	6.28112	6.77925	11.2278	6.1093	3.37012	25.9379	2.04386	2.94046	1.93948	2.08215	2.57169	1.20592	2.45044	3.75486	yes
Dm_00003882-RA	LINC2	nuclear matrix constituent protein-like protein	not assigned.no ontology	AT1G13220	(at1g13220 : 515.0) Encodes a nuclear coiled-coil protein related to the carrot peripheral nuclear protein NMCP1 that is involved in the determination of plant nuclear structure.; LITTLE NUCLEI2 (LINC2); INVOLVED IN: nucleus organization; LOCATED IN: nucleoplasm; EXPRESSED IN: 15 plant structures; EXPRESSED DURING: 7 growth stages; BEST Arabidopsis thaliana protein match is: little nuclei3 (TAIR:…	NA	14.614	27.7292	22.4352	22.7722	22.5728	20.0923	91.6235	1.72376	2.18875	2.02935	2.02051	2.64795	2.00739	2.48111	3.75684	yes
Dm_00000887-RA	NA	NA	not assigned.unknown	NA	no hits & (original description: transcript offset:0 AED:0.58 eAED:0.58 QI:0|0|0|0.5|0|0.5|2|0|82)	NA	4.78873	6.05395	22.5129	15.9134	15.0047	14.6965	52.0497	3.09497	1.83291	1.21554	1.79164	3.43769	1.70345	2.42662	3.75845	yes
Dm_00014720-RA	VAB2	ATPase, V1 complex, subunit B protein	transport.p- and v-ATPases.H+-transporting two-sector ATPase.subunit B	AT4G38510	(at4g38510 : 126.0) ATPase, V1 complex, subunit B protein; FUNCTIONS IN: hydrogen ion transporting ATP synthase activity, rotational mechanism, hydrolase activity, acting on acid anhydrides, catalyzing transmembrane movement of substances, ATP binding, proton-transporting ATPase activity, rotational mechanism; INVOLVED IN: proton transport, ATP metabolic process, ATP synthesis coupled proton tran…	NA	14.0351	14.9841	8.35133	11.556	9.67679	14.3795	50.9331	1.7609	1.83086	2.604	2.38506	1.85035	2.14886	2.48096	3.76364	yes
Dm_00004400-RA	FLD	protein FLOWERING locus D-like protein	misc.oxidases - copper, flavone etc	AT3G10390	(at3g10390 : 996.0) Encodes a plant homolog of a SWIRM domain containing protein found in histone deacetylase complexes in mammals. Lesions in FLD result in hyperacetylation of histones in FLC chromatin, up-regulation of FLC expression and extremely delayed flowering. FLD plays a key role in regulating the reproductive competence of the shoot and results in different developmental phase transitio…	NA	3.33968	7.1548	11.3849	8.43206	8.69507	4.10376	28.9947	2.01742	2.82076	1.34775	1.73615	3.11392	1.77939	2.45043	3.76474	yes
Dm_00008933-RA	SAC9	sacI homology domain-containing protein / WW domain-containing protein	signalling.phosphinositides	AT3G59770	(at3g59770 : 310.0) Encodes a phosphoinositide phosphatase. The sac9 null mutant accumulates elevated levels of PtdIns(4,5)P2 and Ins(1,4,5)P3. The mutant plants have characteristics of constitutive stress responses.; SUPPRESSOR OF ACTIN 9 (SAC9); CONTAINS InterPro DOMAIN/s: WW/Rsp5/WWP (InterPro:IPR001202), Synaptojanin, N-terminal (InterPro:IPR002013); BEST Arabidopsis thaliana protein match is…	NA	4.38679	4.41369	8.95418	9.56117	8.77553	1.82058	24.694	2.48082	3.73611	1.4524	1.48624	2.48513	1.35937	2.42893	3.77107	yes
Dm_00007595-RA		COP1-interacting protein-like protein	signalling.light.COP9 signalosome	AT5G43310	(at5g43310 : 466.0) COP1-interacting protein-related; EXPRESSED IN: 21 plant structures; EXPRESSED DURING: 13 growth stages; BEST Arabidopsis thaliana protein match is: COP1-interacting protein 7 (TAIR:AT4G27430.2). & (loc_os03g64320.1 : 400.0) no description available & (reliability: 932.0) & (original description: transcript offset:0 AED:0.15 eAED:0.16 QI:0|0|0|0.5|1|1|8|0|1020)	NA	14.4714	14.9379	12.2902	11.6898	13.8686	4.30777	48.4568	1.69633	3.49216	1.97152	1.80378	1.74055	2.05067	2.4664	3.77493	yes
Dm_00005250-RA		calcium-dependent lipid-binding family protein	not assigned.no ontology.C2 domain-containing protein	AT1G48090	(at1g48090 : 4323.0) calcium-dependent lipid-binding family protein; FUNCTIONS IN: phosphoinositide binding; INVOLVED IN: signal transduction; LOCATED IN: chloroplast; EXPRESSED IN: 26 plant structures; EXPRESSED DURING: 15 growth stages; CONTAINS InterPro DOMAIN/s: C2 membrane targeting protein (InterPro:IPR018029), Protein of unknown function DUF946 (InterPro:IPR009291), Vacuolar protein sortin…	NA	10.1674	15.878	23.9261	23.2594	19.1164	12.2812	70.7846	2.15621	2.527	1.5646	1.88846	2.79862	1.60533	2.4758	3.78505	yes
Dm_00002151-RA	NA	NA	not assigned.unknown	NA	no hits & (original description: transcript offset:0 AED:0.69 eAED:0.78 QI:0|0|0|0.5|0.4|0.66|6|0|147)	NA	6.4085	12.3449	12.4761	11.7762	10.2504	7.26112	41.2886	1.73784	2.50907	1.73282	2.00483	2.67628	1.81253	2.48457	3.78658	yes
Dm_00016321-RA	FRS5	FAR1-related sequence 5	DNA.unspecified, signalling.light	AT4G38180	(loc_os01g64940.1 : 154.0) no description available & (at4g38180 : 146.0) FAR1-related sequence 5 (FRS5); FUNCTIONS IN: zinc ion binding; INVOLVED IN: response to red or far red light; LOCATED IN: cellular_component unknown; EXPRESSED IN: 22 plant structures; EXPRESSED DURING: 13 growth stages; CONTAINS InterPro DOMAIN/s: MULE transposase, conserved domain (InterPro:IPR018289), Transcription fact…	NA	3.62764	2.84442	16.1273	12.6016	13.0401	9.47427	36.3283	3.67272	1.94419	1.16768	1.47984	3.31094	1.53344	2.4175	3.78973	yes
Dm_00011390-RA		kinase superfamily protein	protein.postranslational modification	AT3G63340	(at3g63340 : 388.0) Protein phosphatase 2C family protein; FUNCTIONS IN: protein serine/threonine kinase activity, protein serine/threonine phosphatase activity, protein kinase activity, catalytic activity, ATP binding; INVOLVED IN: protein amino acid phosphorylation; LOCATED IN: endomembrane system; CONTAINS InterPro DOMAIN/s: Serine/threonine-protein kinase domain (InterPro:IPR002290), Protein …	NA	4.22316	4.3215	6.74426	7.51358	5.41242	3.21933	21.2245	2.29379	2.73044	1.66155	1.9667	2.33471	1.49635	2.48075	3.7917	yes
Dm_00016766-RA	PUM2	pumilio 2	not assigned.no ontology.pumilio/Puf RNA-binding domain-containing protein	AT2G29190	(at2g29190 : 558.0) Encodes a member of the Arabidopsis Pumilio (APUM) proteins containing PUF domain (eight repeats of approximately 36 amino acids each). PUF proteins regulate both mRNA stability and translation through sequence-specific binding to the 3 UTR of target mRNA transcripts.; pumilio 2 (PUM2); CONTAINS InterPro DOMAIN/s: Nucleic acid binding NABP (InterPro:IPR012940), Pumilio RNA-bin…	NA	6.57816	4.11433	6.75785	8.9933	6.10672	6.97265	26.9198	2.71017	1.94502	1.98725	2.13868	2.02765	1.581	2.49065	3.7941	yes
Dm_00002509-RA	SUS2	Pre-mRNA-processing-splicing factor	RNA.processing.splicing	AT1G80070	(at1g80070 : 4130.0) a genetic locus involved in embryogenesis. Mutations in this locus result in an abnormal suspensor and embryo lethality.; ABNORMAL SUSPENSOR 2 (SUS2); INVOLVED IN: nuclear mRNA splicing, via spliceosome; LOCATED IN: chloroplast, membrane; EXPRESSED IN: 24 plant structures; EXPRESSED DURING: 13 growth stages; CONTAINS InterPro DOMAIN/s: Mov34/MPN/PAD-1 (InterPro:IPR000555), Pr…	NA	4.20955	8.22666	10.301	8.18759	10.606	2.50303	28.5995	1.79662	3.51364	1.47145	1.4303	2.76139	1.80373	2.45087	3.79551	yes
Dm_00011340-RA	CPL3	C-terminal domain phosphatase-like 3	RNA.regulation of transcription	AT2G33540	(at2g33540 : 679.0) C-terminal domain phosphatase-like 3 (CPL3); FUNCTIONS IN: phosphoprotein phosphatase activity, CTD phosphatase activity; INVOLVED IN: response to salt stress; LOCATED IN: nucleus; EXPRESSED IN: 22 plant structures; EXPRESSED DURING: 12 growth stages; CONTAINS InterPro DOMAIN/s: FCP1-like phosphatase, phosphatase domain (InterPro:IPR011947), NLI interacting factor (InterPro:IP…	NA	7.08492	12.1973	8.92701	12.2918	10.4409	5.8511	38.3198	1.64993	2.71034	2.09865	1.87522	2.42965	1.63953	2.48672	3.79827	yes
Dm_00002723-RA		metalloendopeptidase / zinc ion binding protein	protein.degradation	AT5G42620	(at5g42620 : 167.0) metalloendopeptidases;zinc ion binding; FUNCTIONS IN: metalloendopeptidase activity, zinc ion binding; INVOLVED IN: proteolysis, cell adhesion; LOCATED IN: endomembrane system, membrane; EXPRESSED IN: 21 plant structures; EXPRESSED DURING: 13 growth stages; CONTAINS InterPro DOMAIN/s: EGF, extracellular (InterPro:IPR013111), EGF-like, type 3 (InterPro:IPR000742), EGF-like regi…	NA	9.86283	15.529	10.6814	12.344	10.8259	4.00412	41.8669	1.42788	3.38568	1.96768	1.95199	2.08139	1.75344	2.4723	3.80038	yes
Dm_00001736-RA	TOR	target of rapamycin	development.multitarget.target of rapamycin	AT1G50030	(loc_os03g52794.1 : 2743.0) no description available & (chl4|514370 : 422.0) no description available & (at1g50030 : 228.0) Related to TOR proteins from yeast and mammals, regulators of cell growth in response to nutrient availability. TOR proteins belong to the family of phosphatidylinositol 3-kinase and are targets of the antiproliferative drug rapamycin. AtTOR binds the yeast FKBP12 protein in…	NA	6.00955	9.48433	11.9422	10.9874	10.5865	3.91098	34.8849	1.8786	3.15529	1.54622	1.72005	2.53585	1.66612	2.47527	3.80698	yes
Dm_00009510-RA		UDP-Glycosyltransferase superfamily protein	not assigned.unknown	AT5G04480	(at5g04480 : 365.0) UDP-Glycosyltransferase superfamily protein; FUNCTIONS IN: molecular_function unknown; INVOLVED IN: biosynthetic process; LOCATED IN: Golgi apparatus; EXPRESSED IN: 21 plant structures; EXPRESSED DURING: 12 growth stages; CONTAINS InterPro DOMAIN/s: Glycosyl transferase, group 1 (InterPro:IPR001296); BEST Arabidopsis thaliana protein match is: glycosyl transferase family 1 pro…	NA	4.25325	4.90947	6.10749	6.17268	5.57016	4.44118	21.3254	2.11409	2.26004	1.79433	1.93505	2.32186	1.78474	2.50474	3.81214	yes
Dm_00009822-RA		actin binding protein	cell.organisation	AT5G07740	(at5g07740 : 692.0) actin binding; FUNCTIONS IN: actin binding; INVOLVED IN: cellular component organization, actin cytoskeleton organization; EXPRESSED IN: shoot apex, stem; CONTAINS InterPro DOMAIN/s: Actin-binding FH2/DRF autoregulatory (InterPro:IPR003104), C2 calcium/lipid-binding domain, CaLB (InterPro:IPR008973), Tensin phosphatase, C2 domain (InterPro:IPR014020), Actin-binding FH2 (InterP…	NA	7.26961	15.8938	16.2356	18.1003	17.8682	7.08136	53.9183	1.7615	2.9281	1.73185	1.59248	2.88917	1.57302	2.4742	3.81285	yes
Dm_00014052-RA	BIG	auxin transport protein (BIG)	hormone metabolism.auxin.signal transduction	AT3G02260	(at3g02260 : 5673.0) Calossin-like protein required for polar auxin transport; BIG (BIG); FUNCTIONS IN: ubiquitin-protein ligase activity, binding, zinc ion binding; INVOLVED IN: response to auxin stimulus, indeterminate inflorescence morphogenesis, photomorphogenesis, root development, auxin polar transport; LOCATED IN: membrane; EXPRESSED IN: 25 plant structures; EXPRESSED DURING: 15 growth sta…	NA	16.1024	20.6956	21.9834	24.5516	20.2289	8.5868	74.3656	1.84515	3.11435	1.75792	1.87807	2.20699	1.5985	2.48668	3.81326	yes
Dm_00009470-RA	NA	NA	not assigned.unknown	NA	no hits & (original description: transcript offset:0 AED:0.22 eAED:0.30 QI:0|0|0|0.66|0.5|0.33|3|0|555)	NA	7.29622	13.212	18.3479	12.8822	12.8922	7.1225	47.2839	1.83697	2.73039	1.36458	1.87075	2.68831	1.8705	2.48139	3.81338	yes
Dm_00004499-RA	SOS1	sodium proton exchanger, putative (NHX7) (SOS1)	transport.unspecified cations	AT2G01980	(loc_os12g44360.4 : 214.0) no description available & (at2g01980 : 198.0) Encodes a plasma membrane-localized Na+/H+ antiporter SOS1. Functions in the extrusion of toxic Na+ from cells and is essential for plant salt tolerance. Has 12 predicted transmembrane domains in the N-terminal region and a long cytoplasmic tail of approx. 700 aa at the C-terminal side. SOS1 interacts through its predicted …	NA	14.2716	8.53481	18.9694	21.0118	18.1737	5.73451	55.9743	2.71021	3.27017	1.55942	1.62057	1.97223	1.4104	2.46398	3.81383	yes
Dm_00002384-RA	CDC48C	cell division cycle 48C	protein.degradation.AAA type, protein.synthesis.ribosome biogenesis.export from nucleus	AT3G01610	(loc_os06g01980.1 : 557.0) no description available & (at3g01610 : 516.0) AAA-type ATPase - Over 90% homologous to CDC48a; cell division cycle 48C (CDC48C); FUNCTIONS IN: nucleoside-triphosphatase activity, ATPase activity, nucleotide binding, ATP binding; INVOLVED IN: embryo development ending in seed dormancy; EXPRESSED IN: 21 plant structures; EXPRESSED DURING: 11 growth stages; CONTAINS Inter…	NA	14.3214	17.0999	24.0962	23.7359	23.8661	21.8001	84.1216	2.29627	1.948	1.8005	1.81607	2.55385	1.82326	2.5021	3.81534	yes
Dm_00006334-RA		RNA-binding (RRM/RBD/RNP motifs) family protein	RNA.RNA binding	AT2G44710	(loc_os04g45930.3 : 340.0) no description available & (at2g44710 : 319.0) RNA-binding (RRM/RBD/RNP motifs) family protein; FUNCTIONS IN: RNA binding, nucleotide binding, nucleic acid binding; EXPRESSED IN: 22 plant structures; EXPRESSED DURING: 12 growth stages; CONTAINS InterPro DOMAIN/s: RNA recognition motif, RNP-1 (InterPro:IPR000504), Nucleotide-binding, alpha-beta plait (InterPro:IPR012677)…	NA	36.0578	58.6604	79.7024	65.4887	68.0544	44.107	233.995	1.9957	2.40699	1.55353	1.78139	2.69696	1.83672	2.49504	3.81963	yes
Dm_00006183-RA		Phosphatidylinositol 3- and 4-kinase family protein with FAT domain-containing protein	signalling.phosphinositides	AT2G17930	(at2g17930 : 5664.0) Phosphatidylinositol 3- and 4-kinase family protein with FAT domain; FUNCTIONS IN: inositol or phosphatidylinositol kinase activity, binding, phosphotransferase activity, alcohol group as acceptor; EXPRESSED IN: 24 plant structures; EXPRESSED DURING: 13 growth stages; CONTAINS InterPro DOMAIN/s: Phosphatidylinositol 3-/4-kinase, catalytic (InterPro:IPR000403), PIK-related kin…	NA	27.8951	45.0019	40.3594	45.0942	42.8518	16.8663	143.152	1.66938	3.0851	1.82637	1.74	2.35913	1.66637	2.48816	3.82349	yes
Dm_00019486-RA	AFH14	Formin Homology 14	not assigned.no ontology.formin homology 2 domain-containing protein	AT1G31810	(at1g31810 : 594.0) Encodes the Type II Arabidopsis formin14. Interacts with microtubules and microfilaments to regulate cell division.; Formin Homology 14 (AFH14); FUNCTIONS IN: microtubule binding, actin binding, actin filament binding; INVOLVED IN: microsporogenesis; LOCATED IN: preprophase band, phragmoplast, spindle; EXPRESSED IN: 24 plant structures; EXPRESSED DURING: 15 growth stages; CONT…	NA	4.888	11.7278	8.51673	8.30612	8.51086	3.06172	28.9566	1.30218	3.24171	1.76375	1.76447	2.56651	1.79901	2.47239	3.82539	yes
Dm_00015857-RA		NB-ARC domain-containing disease resistance protein	stress.biotic	AT3G14470	(loc_os08g12740.2 : 421.0) no description available & (at3g14470 : 308.0) NB-ARC domain-containing disease resistance protein; FUNCTIONS IN: protein binding; INVOLVED IN: apoptosis, defense response; LOCATED IN: endomembrane system; EXPRESSED IN: 23 plant structures; EXPRESSED DURING: 14 growth stages; CONTAINS InterPro DOMAIN/s: Leucine-rich repeat-containing protein (InterPro:IPR015766), NB-ARC…	NA	7.70496	28.4787	32.8573	22.4796	28.1544	4.78021	75.569	1.40744	3.98261	1.20104	1.4239	3.29177	1.74858	2.42128	3.82559	yes
Dm_00015058-RA		transcriptional regulator	not assigned.unknown	AT4G31880	(at4g31880 : 114.0) LOCATED IN: cytosol; EXPRESSED IN: 24 plant structures; EXPRESSED DURING: 14 growth stages; BEST Arabidopsis thaliana protein match is: Tudor/PWWP/MBT superfamily protein (TAIR:AT1G15940.1). & (loc_os04g42320.1 : 97.8) no description available & (reliability: 228.0) & (original description: transcript offset:0 AED:0.54 eAED:0.69 QI:0|0|0|0.66|0.5|0.66|3|0|135)	NA	7.15604	14.3665	23.7133	17.1095	28.5517	7.38744	61.1318	2.0836	3.04285	1.35351	1.09235	3.07322	1.82431	2.4484	3.8312	yes
Dm_00016037-RA		CwfJ-like family protein	not assigned.no ontology	AT1G56290	(at1g56290 : 301.0) CwfJ-like family protein; CONTAINS InterPro DOMAIN/s: Cwf19-like, C-terminal domain-1 (InterPro:IPR006768), Cwf19-like protein, C-terminal domain-2 (InterPro:IPR006767); BEST Arabidopsis thaliana protein match is: CwfJ-like family protein / zinc finger (CCCH-type) family protein (TAIR:AT5G56900.2); Has 2474 Blast hits to 2009 proteins in 284 species: Archae - 2; Bacteria - 39;…	NA	24.5496	35.2259	40.6714	33.772	29.1649	41.0502	136.162	1.95036	1.72941	1.74297	2.22274	2.47092	2.01217	2.50908	3.83181	yes
Dm_00001837-RA	XRN4	exoribonuclease 4	DNA.unspecified	AT1G54490	(at1g54490 : 124.0) Involved in the ethylene response. XRN4 does not appear to regulate ethylene signaling via an RNA-INDUCED SILENCING COMPLEX-based RNA silencing mechanism but acts by independent means. Endogenous suppressor of posttranscriptional gene silencing.; exoribonuclease 4 (XRN4); CONTAINS InterPro DOMAIN/s: 5&apos;-3&apos; exoribonuclease 2 (InterPro:IPR017151), Zinc finger, CCHC-type…	NA	2.85294	4.96216	8.02982	8.12122	6.86759	4.93441	23.1217	2.21697	2.24397	1.51591	1.7422	2.96835	1.4907	2.48926	3.83803	yes
Dm_00009523-RA		transducin family protein / WD-40 repeat family protein	not assigned.no ontology	AT3G63460	(at3g63460 : 355.0) transducin family protein / WD-40 repeat family protein; FUNCTIONS IN: molecular_function unknown; LOCATED IN: CUL4 RING ubiquitin ligase complex; EXPRESSED IN: 23 plant structures; EXPRESSED DURING: 14 growth stages; CONTAINS InterPro DOMAIN/s: WD40 repeat 2 (InterPro:IPR019782), WD40 repeat, conserved site (InterPro:IPR019775), WD40 repeat (InterPro:IPR001680), WD40 repeat-l…	NA	12.1467	10.6944	15.1702	19.9643	18.548	3.89844	50.617	2.24024	3.68932	1.73557	1.44231	2.05357	1.33514	2.46699	3.83929	yes
Dm_00005757-RA	NA	NA	not assigned.unknown	NA	no hits & (original description: transcript offset:0 AED:0.66 eAED:0.66 QI:0|0|0|0.2|1|1|5|0|167)	NA	5.48167	9.88705	10.1475	12.6438	11.8568	10.4946	39.6729	2.00014	1.90904	1.96551	1.74468	2.8542	1.64025	2.50512	3.84155	yes
Dm_00005431-RA	PIP5K1	phosphatidylinositol-4-phosphate 5-kinase 1	signalling.phosphinositides.phosphatidylinositol-4-phosphate 5-kinase	AT1G21980	(at1g21980 : 1070.0) Type I phosphatidylinositol-4-phosphate 5-kinase. Preferentially phosphorylates PtdIns4P. Induced by water stress and abscisic acid in Arabidopsis thaliana. Expressed in procambial cells of leaves, flowers and roots. A N-terminal Membrane Occupation and Recognition Nexus (MORN)affects enzyme activity and distribution.; phosphatidylinositol-4-phosphate 5-kinase 1 (PIP5K1); CON…	NA	14.5008	16.027	26.0169	23.7447	22.7433	7.18413	70.2103	2.12992	3.28758	1.43144	1.62579	2.2718	1.56487	2.48216	3.84382	yes
Dm_00002167-RA	emb1579	ATP/GTP-binding protein family	signalling.G-proteins	AT2G03150	(at2g03150 : 411.0) embryo defective 1579 (emb1579); FUNCTIONS IN: binding, calcium ion binding; INVOLVED IN: embryo development ending in seed dormancy; LOCATED IN: cytosol; EXPRESSED IN: 24 plant structures; EXPRESSED DURING: 14 growth stages; CONTAINS InterPro DOMAIN/s: EF-HAND 2 (InterPro:IPR018249), EF-hand-like domain (InterPro:IPR011992); Has 35333 Blast hits to 34131 proteins in 2444 spec…	NA	41.094	63.6424	56.507	48.7075	54.0256	38.5551	199.555	1.64849	2.3714	1.81979	1.88467	2.27876	2.03407	2.51393	3.84508	yes
Dm_00003148-RA		CW-type Zinc Finger	not assigned.unknown	AT3G62900	(loc_os07g47360.3 : 310.0) no description available & (at3g62900 : 194.0) CW-type Zinc Finger; FUNCTIONS IN: zinc ion binding; INVOLVED IN: biological_process unknown; LOCATED IN: cellular_component unknown; EXPRESSED IN: trichome; CONTAINS InterPro DOMAIN/s: Zinc finger, CW-type (InterPro:IPR011124); BEST Arabidopsis thaliana protein match is: unknown protein (TAIR:AT1G02990.2); Has 30201 Blast …	NA	6.81382	12.1521	12.1499	12.6028	13.5212	8.21847	42.806	1.81611	2.38067	1.81633	1.66166	2.64785	1.76325	2.50706	3.84574	yes
Dm_00002666-RA	UPL1	LOW protein: E3 ubiquitin ligase-like protein	protein.degradation.ubiquitin.E3.HECT	AT1G55860	(at1g55860 : 3701.0) encodes a ubiquitin-protein ligase containing a HECT domain. There are six other HECT-domain UPLs in Arabidopsis.; ubiquitin-protein ligase 1 (UPL1); CONTAINS InterPro DOMAIN/s: Ubiquitin-associated/translation elongation factor EF1B, N-terminal (InterPro:IPR000449), Ubiquitin-associated/translation elongation factor EF1B, N-terminal, eukaryote (InterPro:IPR015940), E3 ubiqui…	NA	16.9614	25.0422	28.6379	31.8604	28.9889	9.00182	89.3153	1.83436	3.31023	1.6407	1.62324	2.39599	1.48687	2.48538	3.84883	yes
Dm_00000459-RA	SDG29	SET domain group 29	RNA.regulation of transcription.SET-domain transcriptional regulator family	AT5G53430	(at5g53430 : 600.0) Homology Subgroup III; Orthology Group 2 - A putative histone methyltransferase (predicted to methylate H3K4) related to the Drosophila trithorax group proteins TRX and TRR and the yeast gene SET1. A plant line expressing an RNAi construct directed against this gene has reduced agrobacterium-mediated tumor formation.; SET domain group 29 (SDG29); FUNCTIONS IN: DNA binding, zin…	NA	4.50539	9.6097	15.5644	9.13853	10.1697	5.65475	34.2741	1.83336	2.59691	1.13827	1.75039	2.92194	1.90591	2.48309	3.85843	yes
Dm_00004466-RA		kinase with adenine nucleotide alpha hydrolases-like domain-containing protein	protein.postranslational modification.kinase.receptor like cytoplasmatic kinase VI	AT5G63940	(at5g63940 : 563.0) Protein kinase protein with adenine nucleotide alpha hydrolases-like domain; FUNCTIONS IN: protein serine/threonine kinase activity, protein kinase activity, kinase activity, ATP binding; INVOLVED IN: protein amino acid phosphorylation, response to stress; LOCATED IN: cellular_component unknown; EXPRESSED IN: 24 plant structures; EXPRESSED DURING: 14 growth stages; CONTAINS In…	NA	33.2368	21.2198	59.3013	89.5141	64.3887	114.569	231.06	3.4442	1.01173	1.961	1.84346	2.79676	1.36794	2.4511	3.8594	yes
Dm_00020516-RA		nuclear factor kappa-B-binding-like protein	RNA.regulation of transcription.putative transcription regulator	AT3G45830	(at3g45830 : 668.0) unknown protein; FUNCTIONS IN: molecular_function unknown; INVOLVED IN: biological_process unknown; LOCATED IN: cellular_component unknown; EXPRESSED IN: 24 plant structures; EXPRESSED DURING: 15 growth stages; BEST Arabidopsis thaliana protein match is: unknown protein (TAIR:AT1G02290.1); Has 499 Blast hits to 438 proteins in 100 species: Archae - 0; Bacteria - 7; Metazoa - 2…	NA	5.66777	6.89444	9.22335	9.37788	10.5312	5.74038	30.1945	2.12974	2.39164	1.7092	1.51797	2.41078	1.68642	2.51809	3.88041	yes
Dm_00007269-RA	SDG2	SET domain protein 2	RNA.regulation of transcription.SET-domain transcriptional regulator family	AT4G15180	(at4g15180 : 2068.0) SET domain protein 2 (SDG2); EXPRESSED IN: male gametophyte, cultured cell; EXPRESSED DURING: M germinated pollen stage; CONTAINS InterPro DOMAIN/s: SET domain (InterPro:IPR001214); BEST Arabidopsis thaliana protein match is: histone methyltransferases(H3-K4 specific);histone methyltransferases(H3-K36 specific) (TAIR:AT1G77300.1); Has 30201 Blast hits to 17322 proteins in 780…	NA	11.1277	20.5156	19.5181	17.8669	17.5046	10.714	61.5003	1.58354	2.5213	1.65552	1.81244	2.46508	1.78271	2.51999	3.88805	yes
Dm_00007496-RA	SPI	BEACH-DOMAIN HOMOLOG A1	cell.vesicle transport	AT1G03060	(at1g03060 : 4376.0) Encodes a WD/BEACH domain protein involved in cell morphogenesis.; SPIRRIG (SPI); FUNCTIONS IN: binding; INVOLVED IN: signal transduction, multidimensional cell growth, vacuole organization, trichome morphogenesis; LOCATED IN: cellular_component unknown; EXPRESSED IN: 23 plant structures; EXPRESSED DURING: 15 growth stages; CONTAINS InterPro DOMAIN/s: WD40 repeat 2 (InterPro:…	NA	10.2788	9.58091	3.91192	6.44218	6.69497	4.25924	25.4237	1.4075	2.57845	2.70142	1.92397	1.30518	1.97944	2.50202	3.89119	yes
Dm_00004367-RA	BRM	transcription regulatory protein SNF2	RNA.regulation of transcription.Chromatin Remodeling Factors	AT2G46020	(at2g46020 : 2165.0) Encodes a SWI/SNF chromatin remodeling ATPase that upregulates transcription of all three CUC genes and is involved in the formation and/or maintenance of boundary cells during embryogenesis. Also mediates repression of expression of seed storage proteins in vegetative tissues. Interacts strongly with AtSWI3C, also with AtSWI3B, but not with AtSWI3A or AtSWI3D.; BRAHMA (BRM);…	NA	13.7949	25.0173	25.9957	25.6281	26.8536	16.0014	84.1031	1.74886	2.3937	1.69348	1.64652	2.60715	1.71387	2.5212	3.89128	yes
Dm_00002922-RA	CFM2	CRM family member 2	not assigned.unknown	AT3G01370	(at3g01370 : 732.0) Encodes a protein containing a CRM domain that is involved in group I and group II intron splicing.; CRM family member 2 (CFM2); FUNCTIONS IN: RNA binding; INVOLVED IN: Group I intron splicing, Group II intron splicing; LOCATED IN: chloroplast; EXPRESSED IN: 22 plant structures; EXPRESSED DURING: 13 growth stages; CONTAINS InterPro DOMAIN/s: RNA-binding, CRM domain (InterPro:I…	NA	3.49286	6.05936	12.596	7.7837	8.82531	4.50531	26.2649	2.11471	2.54183	1.05952	1.57189	2.90897	1.75423	2.4881	3.89255	yes
Dm_00008177-RA		LOW protein: zinc finger CCCH domain protein	not assigned.unknown	AT5G53440	(at5g53440 : 208.0) unknown protein; FUNCTIONS IN: molecular_function unknown; INVOLVED IN: biological_process unknown; LOCATED IN: cytosol; EXPRESSED IN: 25 plant structures; EXPRESSED DURING: 15 growth stages; Has 1807 Blast hits to 1807 proteins in 277 species: Archae - 0; Bacteria - 0; Metazoa - 736; Fungi - 347; Plants - 385; Viruses - 0; Other Eukaryotes - 339 (source: NCBI BLink). & (loc_o…	NA	9.2236	10.0572	8.87226	12.0717	11.789	10.864	40.227	1.99862	1.88714	2.17982	1.76953	2.12212	1.73606	2.53547	3.89335	yes
Dm_00009249-RA	EBS1	EMS-MUTAGENIZED BRI1 SUPPRESSOR 1	protein.glycosylation.UDP-glucose glycoprotein glucosyltransferase	AT1G71220	(at1g71220 : 509.0) Encodes UDP-glucose:glycoprotein glucosyltransferase. Non-receptor component required for EFR-mediated immunity. Mutants show de-repressed anthocyanin accumulation in the presence of elf18, and EFR accumulation and signalling.; EMS-mutagenized bri1 suppressor 1 (EBS1); CONTAINS InterPro DOMAIN/s: Glycosyl transferase, family 8 (InterPro:IPR002495), UDP-glucose:Glycoprotein Glu…	NA	11.4516	18.104	20.5359	22.1811	19.2226	7.21698	60.8318	1.74687	3.07584	1.56849	1.66013	2.40103	1.4535	2.50577	3.89683	yes
Dm_00005444-RA		Transducin/WD40 repeat-like superfamily protein	development.unspecified	AT3G15470	(at3g15470 : 890.0) Transducin/WD40 repeat-like superfamily protein; CONTAINS InterPro DOMAIN/s: WD40 repeat 2 (InterPro:IPR019782), WD40 repeat, conserved site (InterPro:IPR019775), WD40 repeat (InterPro:IPR001680), G-protein beta WD-40 repeat, region (InterPro:IPR020472), WD40 repeat-like-containing domain (InterPro:IPR011046), WD40-repeat-containing domain (InterPro:IPR017986), WD40/YVTN repea…	NA	15.0931	38.4999	20.3812	45.0611	30.721	24.5457	106.995	1.47346	2.12203	2.39035	1.80044	2.82271	1.24587	2.50311	3.89766	yes
Dm_00017768-RA		extra-large G-like protein, putative (DUF3133)	signalling.G-proteins	AT3G61670	(at3g61670 : 252.0) Protein of unknown function (DUF3133); FUNCTIONS IN: molecular_function unknown; INVOLVED IN: biological_process unknown; LOCATED IN: plasma membrane; EXPRESSED IN: 22 plant structures; EXPRESSED DURING: 13 growth stages; CONTAINS InterPro DOMAIN/s: Protein of unknown function DUF3133 (InterPro:IPR021480); BEST Arabidopsis thaliana protein match is: Protein of unknown function…	NA	2.07025	3.91747	8.96449	6.97994	8.56577	7.72352	23.0187	2.55208	1.57205	1.3581	1.42339	3.47212	1.7188	2.48611	3.89779	yes
Dm_00011897-RA	NA	NA	not assigned.unknown	NA	no hits & (original description: transcript offset:0 AED:0.81 eAED:0.82 QI:0|0|0|0.33|1|1|3|0|112)	NA	8.77575	20.5338	46.0411	39.5329	42.8006	9.18946	94.7199	2.20233	3.37454	1.03755	1.14271	3.40339	1.25897	2.43328	3.89887	yes
Dm_00013853-RA		Vacuolar sorting protein 39	not assigned.no ontology	AT1G22860	(at1g22860 : 687.0) Vacuolar sorting protein 39; FUNCTIONS IN: small GTPase regulator activity; INVOLVED IN: biological_process unknown; LOCATED IN: cellular_component unknown; EXPRESSED IN: 22 plant structures; EXPRESSED DURING: 13 growth stages; CONTAINS InterPro DOMAIN/s: Citron-like (InterPro:IPR001180), Vacuolar sorting protein 39/Transforming growth factor beta receptor-associated domain 1 …	NA	5.64187	7.73864	9.19641	7.24486	8.74249	4.36439	26.9368	1.79767	2.62525	1.5509	1.61907	2.24312	1.89615	2.52416	3.89916	yes
Dm_00002806-RA	NA	NA	not assigned.unknown	NA	no hits & (original description: transcript offset:0 AED:0.47 eAED:0.50 QI:0|-1|0|1|-1|1|1|0|103)	NA	0	0.164611	0.158151	0.47584	0.388913	0.128473	7.20289	5.42579	5.80421	5.45722	4.25646	8.22779	3.99275	0	0
Dm_00002843-RA	NA	NA	not assigned.unknown	NA	no hits & (original description: transcript offset:0 AED:0.41 eAED:0.43 QI:0|0|0|1|0|0|2|0|89)	NA	0.432098	0.336969	0.16146	0.473142	0.469031	0.202587	6.7539	4.30083	5.06781	5.43481	3.86811	3.80864	3.9439	0	0
Dm_00019225-RA	FRS3	FAR1-related sequence 3	signalling.light, DNA.unspecified	AT2G27110	(loc_os01g63380.1 : 89.0) no description available & (at2g27110 : 85.5) FAR1-related sequence 3 (FRS3); FUNCTIONS IN: zinc ion binding; INVOLVED IN: response to red or far red light; LOCATED IN: cellular_component unknown; EXPRESSED IN: 22 plant structures; EXPRESSED DURING: 13 growth stages; CONTAINS InterPro DOMAIN/s: Zinc finger, PMZ-type (InterPro:IPR006564), Zinc finger, SWIM-type (InterPro:…	NA	0.332141	0.36217	0.419041	0.513582	0.380581	0.208236	5.68044	3.98846	4.78554	3.61402	3.95333	4.06711	3.43987	0	0
Dm_00010098-RA		hAT transposon superfamily protein	DNA.unspecified	AT1G43260	(loc_os01g28200.1 : 122.0) no description available & (at1g43260 : 107.0) hAT transposon superfamily protein; CONTAINS InterPro DOMAIN/s: Protein of unknown function DUF659 (InterPro:IPR007021); BEST Arabidopsis thaliana protein match is: hAT transposon superfamily protein (TAIR:AT5G31412.1); Has 599 Blast hits to 592 proteins in 25 species: Archae - 0; Bacteria - 0; Metazoa - 11; Fungi - 2; Plan…	NA	0.31412	0.159586	0.48282	0.538192	0.645398	0.127113	5.4177	5.09123	5.45797	3.48901	3.07354	4.11786	3.31725	0	0
Dm_00013743-RA	NA	NA	not assigned.unknown	NA	no hits & (original description: transcript offset:0 AED:0.35 eAED:0.43 QI:0|0|0|0.5|1|1|2|0|102)	NA	0.0780203	0.54115	0.0677413	0.651607	0.474968	0.349562	5.1105	3.23559	3.86469	6.23186	3.37588	5.89867	2.9496	0	0
Dm_00016929-RA		actin binding protein	cell.organisation	AT5G07740	(at5g07740 : 555.0) actin binding; FUNCTIONS IN: actin binding; INVOLVED IN: cellular component organization, actin cytoskeleton organization; EXPRESSED IN: shoot apex, stem; CONTAINS InterPro DOMAIN/s: Actin-binding FH2/DRF autoregulatory (InterPro:IPR003104), C2 calcium/lipid-binding domain, CaLB (InterPro:IPR008973), Tensin phosphatase, C2 domain (InterPro:IPR014020), Actin-binding FH2 (InterP…	NA	0.0581917	0.310007	0.293875	0.423998	0.266402	0.150871	4.40421	3.82334	4.82235	3.94268	4.03442	6.25478	3.36498	0	0
Dm_00003757-RA	NA	NA	not assigned.unknown	NA	no hits & (original description: transcript offset:0 AED:0.59 eAED:0.59 QI:0|0|0|1|1|1|2|0|67)	NA	0.0852329	0.097997	0.0621219	0.36385	0.19324	0.0626557	4.36447	5.48475	5.92387	5.52	4.60665	5.9268	3.71461	0	0
Dm_00012884-RA	NA	NA	not assigned.unknown	NA	no hits & (original description: transcript offset:0 AED:0.24 eAED:0.24 QI:0|0|0|1|0|0|2|0|102)	NA	0.0780203	0.282924	0.251662	0.699751	0.36632	0.170889	4.28074	3.86819	4.61739	4.02056	3.52947	5.63764	2.56985	0	0
Dm_00014565-RA	LAC14	laccase 14	secondary metabolism.simple phenols	AT5G09360	(at5g09360 : 523.0) putative laccase, a member of laccase family of genes (17 members in Arabidopsis).; laccase 14 (LAC14); FUNCTIONS IN: laccase activity; INVOLVED IN: oxidation reduction, lignin catabolic process; LOCATED IN: endomembrane system, apoplast; EXPRESSED IN: central cell, fruit; CONTAINS InterPro DOMAIN/s: Multicopper oxidase, type 3 (InterPro:IPR011707), Laccase (InterPro:IPR017761…	NA	0.451053	0.127679	0.086564	0.00935937	0.393035	0.164822	4.03217	4.99302	4.61409	5.51768	3.37183	3.1632	8.34076	0	0
Dm_00001838-RA	NA	NA	not assigned.unknown	NA	no hits & (original description: transcript offset:0 AED:0.88 eAED:1.00 QI:0|0|0|0.5|1|1|2|0|106)	NA	0.178981	0.228004	0.490616	0.717845	0.512093	0.306541	3.89741	4.0334	3.71997	3.00196	2.92375	4.52898	2.45052	0	0
Dm_00016765-RA	NA	NA	not assigned.unknown	NA	no hits & (original description: transcript offset:0 AED:0.57 eAED:0.59 QI:0|0|0|0.8|0|0|5|0|117)	NA	0.233653	0.287995	0.389913	0.596947	0.302366	0.268867	3.88415	3.77139	3.86173	3.2664	3.69816	4.08834	2.70846	0	0
Dm_00008905-RA	NA	NA	not assigned.unknown	NA	no hits & (original description: transcript offset:0 AED:0.57 eAED:0.57 QI:0|0|0|0.66|0|0.33|3|0|127)	NA	0.197558	0.56841	0.49166	0.328192	0.437019	0.162147	3.67189	2.68185	4.39967	2.9444	3.02389	4.3603	3.48591	0	0
Dm_00019177-RA	NA	NA	not assigned.unknown	NA	(loc_os04g13790.1 : 108.0) no description available & (reliability: 100.0) & (original description: transcript offset:0 AED:0.66 eAED:0.66 QI:0|0|0|0.2|0.5|0.6|5|0|429)	NA	0.191517	0.407589	0.281642	0.295987	0.417716	0.0559361	3.63747	3.1537	5.89648	3.67613	3.1388	4.18386	3.57156	0	0
Dm_00008139-RA		hAT transposon superfamily	DNA.synthesis/chromatin structure.retrotransposon/transposase.hat-like transposase, RNA.regulation of transcription.putative transcription regulator	AT1G79740	(loc_os08g19870.1 : 464.0) no description available & (chl4|521685 : 107.0) no description available & (at1g79740 : 99.8) hAT transposon superfamily; FUNCTIONS IN: protein dimerization activity, DNA binding; INVOLVED IN: biological_process unknown; LOCATED IN: cellular_component unknown; CONTAINS InterPro DOMAIN/s: HAT dimerisation (InterPro:IPR008906), Zinc finger, BED-type predicted (InterPro:I…	NA	0.46449	0.362003	0.714241	0.807714	0.818467	0.176987	3.56553	3.30356	4.32705	2.33962	2.13021	2.90439	2.15136	0	0
Dm_00009835-RA	NA	NA	not assigned.unknown	NA	no hits & (original description: transcript offset:0 AED:0.88 eAED:0.88 QI:0|0|0|0.08|1|1|12|0|1020)	NA	0.296039	0.364079	0.422952	0.389179	0.489083	0.153676	3.46728	3.24988	4.53068	3.03347	2.83309	3.53749	3.12759	0	0
Dm_00012391-RA	NA	NA	not assigned.unknown	NA	(loc_os04g57060.1 : 122.0) no description available & (reliability: 100.0) & (original description: transcript offset:0 AED:0.25 eAED:0.25 QI:0|0|0|0.5|1|1|2|0|382)	NA	0.268995	0.228541	0.260364	0.234418	0.310733	0.0199002	3.38007	3.88251	7.1977	3.71725	3.45143	3.65908	3.81787	0	0
Dm_00003972-RA		hAT dimerization domain-containing protein / transposase-like protein	DNA.synthesis/chromatin structure.retrotransposon/transposase.hat-like transposase	AT5G33406	(at5g33406 : 155.0) hAT dimerisation domain-containing protein / transposase-related; FUNCTIONS IN: protein dimerization activity; INVOLVED IN: biological_process unknown; LOCATED IN: mitochondrion; CONTAINS InterPro DOMAIN/s: HAT dimerisation (InterPro:IPR008906); BEST Arabidopsis thaliana protein match is: hAT transposon superfamily (TAIR:AT4G15020.2); Has 707 Blast hits to 681 proteins in 26 s…	NA	0.284702	0.0708561	0.120554	0.154725	0.11003	0.106192	3.3273	5.56253	4.92893	4.85313	4.89271	3.5477	4.41722	0	0
Dm_00010699-RA	PRP39-2	Tetratricopeptide repeat (TPR)-like superfamily protein	not assigned.unknown	AT5G46400	(loc_os08g29124.1 : 89.7) no description available & (at5g46400 : 87.8) PRP39-2; INVOLVED IN: RNA processing; LOCATED IN: intracellular; EXPRESSED IN: 21 plant structures; EXPRESSED DURING: 13 growth stages; CONTAINS InterPro DOMAIN/s: RNA-processing protein, HAT helix (InterPro:IPR003107); BEST Arabidopsis thaliana protein match is: Tetratricopeptide repeat (TPR)-like superfamily protein (TAIR:A…	NA	0.25437	0.382618	0.533954	0.64931	0.514553	0.108286	3.27558	3.11276	5.21809	2.67034	2.66282	3.7002	NA	0	0
Dm_00009547-RA		Stigma-specific Stig1 family protein	not assigned.no ontology	AT4G26880	(at4g26880 : 93.6) Stigma-specific Stig1 family protein; FUNCTIONS IN: molecular_function unknown; INVOLVED IN: biological_process unknown; LOCATED IN: endomembrane system; CONTAINS InterPro DOMAIN/s: Stigma-specific protein Stig1 (InterPro:IPR006969); BEST Arabidopsis thaliana protein match is: Stigma-specific Stig1 family protein (TAIR:AT5G55110.1); Has 1807 Blast hits to 1807 proteins in 277 s…	NA	0	0.0569011	0.0926258	0.42405	0.531673	0.069217	3.27091	5.78541	5.69257	4.90894	NA	7.56554	2.94801	0	0
Dm_00006360-RA	NA	NA	not assigned.unknown	NA	no hits & (original description: transcript offset:0 AED:0.80 eAED:0.80 QI:0|0|0|0.33|1|1|3|0|279)	NA	0.470886	0.317828	0.120447	0.385401	0.291956	0.230637	3.26587	3.36181	3.86663	4.55345	3.4659	2.8464	3.11656	0	0
Dm_00008717-RA	TCP12	TCP domain protein 12	RNA.regulation of transcription.TCP transcription factor family	AT1G68800	(at1g68800 : 90.1) Encodes a TCP transcription factor, closely related to teosinte branched1, arrests axillary bud development and prevents axillary bud outgrowth. Transcription level and mutant phenotype are weaker than its homolog BRC1 (At3G18550).; TCP domain protein 12 (TCP12); CONTAINS InterPro DOMAIN/s: Transcription factor, TCP (InterPro:IPR005333), CYC/TB1, R domain (InterPro:IPR017888), …	NA	0.0723345	0.076477	0.0474233	0.366686	0.189137	0.563704	3.25062	5.42982	2.51573	5.71648	4.15194	5.44218	3.13304	0	0
Dm_00009468-RA	NA	NA	not assigned.unknown	NA	no hits & (original description: transcript offset:0 AED:0.97 eAED:0.97 QI:0|0|0|0.33|1|1|3|0|172)	NA	0.141171	0.329095	0.227322	0.476621	0.640183	0.115109	3.20818	3.28164	4.65491	3.76306	2.31941	4.40288	2.77881	0	0
Dm_00002182-RA	NA	NA	not assigned.unknown	NA	(loc_os04g50050.1 : 90.9) no description available & (reliability: 100.0) & (original description: transcript offset:0 AED:0.34 eAED:0.36 QI:0|0|0|1|0.5|0.33|3|0|290)	NA	0.153855	0.464997	0.535871	0.50022	0.854393	0.0926293	3.06557	2.70944	5.06694	2.568	1.84181	4.21455	2.60704	0	0
Dm_00006550-RA	NA	NA	not assigned.unknown	NA	(p10978|polx_tobac : 152.0) Retrovirus-related Pol polyprotein from transposon TNT 1-94 [Includes: Protease (EC 3.4.23.-); Reverse transcriptase (EC 2.7.7.49); Endonuclease] - Nicotiana tabacum (Common tobacco) & (loc_os02g37790.1 : 124.0) no description available & (reliability: 100.0) & (original description: transcript offset:0 AED:0.12 eAED:0.12 QI:0|0|0|1|0|0|2|0|301)	NA	0.0265269	0.500713	0.427551	0.896389	0.380472	0.268625	3.03704	2.58088	3.51119	2.86176	2.96104	6.69871	1.74735	0	0
Dm_00013756-RA	NA	NA	not assigned.unknown	NA	no hits & (original description: transcript offset:0 AED:0.38 eAED:0.38 QI:0|0|0|0.33|1|1|3|0|203)	NA	0.199994	0.108407	0.127816	0.236104	0.135141	0.106545	3.02302	4.80951	4.79936	4.63177	4.63862	3.93514	3.68158	0	0
Dm_00003780-RA	NA	NA	not assigned.unknown	NA	(p10978|polx_tobac : 123.0) Retrovirus-related Pol polyprotein from transposon TNT 1-94 [Includes: Protease (EC 3.4.23.-); Reverse transcriptase (EC 2.7.7.49); Endonuclease] - Nicotiana tabacum (Common tobacco) & (loc_os12g34770.1 : 103.0) no description available & (reliability: 100.0) & (original description: transcript offset:0 AED:0.21 eAED:0.21 QI:0|-1|0|1|-1|1|1|0|147)	NA	0.590747	0.341856	0.650927	0.377239	0.56943	0.0383053	2.90706	3.07852	6.45772	2.19032	2.35915	2.31777	2.89938	0	0
Dm_00005900-RA	NA	NA	not assigned.unknown	NA	no hits & (original description: transcript offset:0 AED:0.71 eAED:0.71 QI:0|-1|0|1|-1|1|1|0|121)	NA	0.171437	0.286522	0.17682	0.406144	0.0974643	0.0346937	2.87405	3.31832	6.16763	4.20951	4.897	4.0054	2.73921	0	0
Dm_00003924-RA		P-loop containing nucleoside triphosphate hydrolases superfamily protein	not assigned.no ontology	AT3G50620	(at3g50620 : 110.0) P-loop containing nucleoside triphosphate hydrolases superfamily protein; FUNCTIONS IN: sulfotransferase activity; INVOLVED IN: biological_process unknown; LOCATED IN: cellular_component unknown; EXPRESSED IN: 20 plant structures; EXPRESSED DURING: 11 growth stages; CONTAINS InterPro DOMAIN/s: Sulfotransferase domain (InterPro:IPR000863); BEST Arabidopsis thaliana protein matc…	NA	0.199207	0.170299	0.197162	0.0874992	0.0596145	0.0976264	2.79034	4.00525	NA	NA	5.41	NA	4.70874	0	0
Dm_00015789-RA	NA	NA	not assigned.unknown	NA	no hits & (original description: transcript offset:0 AED:0.77 eAED:0.77 QI:0|0|0|0.5|1|1|2|0|102)	NA	0.0346824	0.327151	0.094677	0.264021	0.339271	0.0372641	2.78169	NA	5.87372	5.13428	NA	5.87665	NA	0	0
Dm_00017242-RA	NA	NA	not assigned.unknown	NA	no hits & (original description: transcript offset:0 AED:0.52 eAED:0.52 QI:0|0|0|0.5|0|0.25|4|0|104)	NA	0.282554	0.263048	0.111272	0.217718	0.285619	0.0369023	2.77474	3.4156	5.88708	4.47039	3.36328	3.36523	3.52281	0	0
Dm_00010226-RA	NA	NA	not assigned.unknown	NA	no hits & (original description: transcript offset:0 AED:0.43 eAED:0.44 QI:0|0|0|1|0|0|2|0|67)	NA	0.303531	0.237992	0.258883	0.201762	0.182668	0	2.70975	NA	6.18577	NA	NA	NA	NA	0	0
Dm_00008006-RA	NA	NA	not assigned.unknown	NA	no hits & (original description: transcript offset:0 AED:0.34 eAED:0.35 QI:0|0|0|0.4|1|1|5|0|438)	NA	0.332425	0.398633	0.671279	0.28757	0.758845	0.180396	2.66796	2.72944	3.92249	1.98161	1.80397	2.9995	3.21449	0	0
Dm_00011051-RA	NA	NA	not assigned.unknown	NA	(loc_os03g35480.1 : 85.9) no description available & (reliability: 100.0) & (original description: transcript offset:0 AED:0.54 eAED:0.55 QI:0|0|0|0.33|1|1|3|0|295)	NA	0.3071	0.14308	0.419267	0.0917967	0.406489	0.0639445	2.63574	4.21818	5.44247	2.6452	2.70334	3.05999	4.72229	0	0
Dm_00012885-RA	NA	NA	not assigned.unknown	NA	no hits & (original description: transcript offset:0 AED:0.76 eAED:0.76 QI:0|-1|0|1|-1|1|1|0|115)	NA	0.164974	0.15058	0.5304	0.395346	0.386753	0.0489641	2.61618	4.10511	5.95483	2.28588	2.71238	4.07119	2.66487	0	0
Dm_00005566-RA	NA	NA	not assigned.unknown	NA	no hits & (original description: transcript offset:0 AED:0.43 eAED:0.43 QI:0|0|0|0.5|1|1|2|0|86)	NA	0.230942	0.359088	0.0848703	0.430528	0.575355	0.0976264	2.58528	2.85073	4.65222	5.00632	NA	3.3801	NA	0	0
Dm_00009285-RA		hAT transposon superfamily protein	RNA.regulation of transcription.putative transcription regulator, DNA.unspecified	AT1G43260	(loc_os12g35120.1 : 123.0) no description available & (at1g43260 : 109.0) hAT transposon superfamily protein; CONTAINS InterPro DOMAIN/s: Protein of unknown function DUF659 (InterPro:IPR007021); BEST Arabidopsis thaliana protein match is: hAT transposon superfamily protein (TAIR:AT5G31412.1); Has 599 Blast hits to 592 proteins in 25 species: Archae - 0; Bacteria - 0; Metazoa - 11; Fungi - 2; Plan…	NA	0.288656	0.271722	0.178908	0.34754	0.344338	0.198028	2.5806	3.25992	3.62507	3.94053	2.99847	3.18302	2.85622	0	0
Dm_00008198-RA	NA	NA	not assigned.unknown	NA	(loc_os12g35120.1 : 93.6) no description available & (reliability: 100.0) & (original description: transcript offset:0 AED:0.41 eAED:0.42 QI:0|0|0|1|1|1|3|0|216)	NA	0.222598	0.120079	0.140675	0.312224	0.229355	0.106766	2.55219	4.40398	4.62677	4.27214	3.48385	3.51459	3.05875	0	0
Dm_00009242-RA	NA	NA	not assigned.unknown	NA	no hits & (original description: transcript offset:0 AED:0.74 eAED:0.74 QI:0|0|0|0.33|1|1|3|0|128)	NA	0.214155	0.0727206	0.278153	0.25687	0.227313	0.0327964	2.52219	5.19286	6.06615	3.29514	3.48138	3.43807	3.46156	0	0
Dm_00002865-RA		Pentatricopeptide repeat (PPR-like) superfamily protein	hormone metabolism.salicylic acid.synthesis-degradation	AT1G05670	(at1g05670 : 818.0) Pentatricopeptide repeat (PPR-like) superfamily protein; CONTAINS InterPro DOMAIN/s: Pentatricopeptide repeat (InterPro:IPR002885); BEST Arabidopsis thaliana protein match is: Tetratricopeptide repeat (TPR)-like superfamily protein (TAIR:AT5G01110.1); Has 76919 Blast hits to 23782 proteins in 722 species: Archae - 3; Bacteria - 657; Metazoa - 3612; Fungi - 1352; Plants - 68766…	NA	0.276478	0.444214	0.919747	0.611322	0.744096	0.256063	2.50956	2.48985	3.33211	1.42467	1.75916	3.18074	2.04699	0	0
Dm_00008990-RA	NA	NA	not assigned.unknown	NA	no hits & (original description: transcript offset:0 AED:0.91 eAED:1.00 QI:0|0|0|0.5|1|0.5|2|0|95)	NA	0.277098	0.134709	0.25094	0.432553	0.322476	0.2049	2.5044	4.17636	3.70248	3.29796	2.90578	3.1516	2.52577	0	0
Dm_00018592-RA	NA	NA	not assigned.unknown	NA	(loc_os03g33530.1 : 102.0) no description available & (reliability: 100.0) & (original description: transcript offset:0 AED:0.14 eAED:0.14 QI:0|0|0|0.5|1|1|2|0|227)	NA	0.0956935	0.378805	0.548633	0.319749	0.345105	0.0893614	2.49931	2.73325	4.68799	2.22792	2.79929	4.68198	3.04784	0	0
Dm_00006358-RA	NA	NA	not assigned.unknown	NA	no hits & (original description: transcript offset:0 AED:0.39 eAED:0.40 QI:0|0|0|1|0|0.33|3|0|138)	NA	0.128129	0.218536	0.504329	0.719878	0.606547	0.330617	2.49291	3.48987	2.83181	2.26589	2.04981	4.27001	1.80608	0	0
Dm_00016361-RA	NA	NA	not assigned.unknown	NA	no hits & (original description: transcript offset:0 AED:0.80 eAED:0.80 QI:0|0|0|0.66|0|0|3|0|233)	NA	0.280497	0.0826787	0.151616	0.257791	0.225835	0.0826636	2.49163	4.89551	5.02127	4.07137	3.52972	3.1368	3.30337	0	0
Dm_00013676-RA	NA	NA	not assigned.unknown	NA	(loc_os08g12020.1 : 80.9) no description available & (reliability: 100.0) & (original description: transcript offset:0 AED:0.30 eAED:0.30 QI:0|0|0|0.5|1|1|2|0|92)	NA	0.249097	0.0968556	0	0.146935	0.324643	0.10252	2.47364	4.69757	4.66877	6.7822	NA	NA	4.06472	0	0
Dm_00012909-RA	NA	NA	not assigned.unknown	NA	no hits & (original description: transcript offset:50 AED:0.07 eAED:0.71 QI:50|0|0|1|0|0|2|0|52)	NA	0	0.0975595	0.13862	0.0537135	0.330586	0	2.41081	NA	6.04799	NA	NA	6.05091	NA	0	0
Dm_00010318-RA	DAYSLEEPER	BED zinc finger and hAT dimerization domain-containing protein DAYSLEEPER	DNA.unspecified	AT3G42170	(loc_os07g34120.1 : 152.0) no description available & (p08770|tra1_maize : 126.0) Putative AC transposase (ORFA) - Zea mays (Maize) & (at3g42170 : 85.1) transposase-like gene with conserved domains from the family of hAT transposases that includes hobo from Drosophila melanogaster, Activator (Ac) from maize, and Tam3 from snapdragon but lacks several amino acids known to be essential for Ac trans…	NA	0	0.01648	0.0318155	0.0320677	0.119706	0	2.3315	6.98661	8.35427	5.94796	4.30751	8.35719	5.94266	0	0
Dm_00015401-RA	NA	NA	not assigned.unknown	NA	(loc_os03g20930.1 : 192.0) no description available & (reliability: 100.0) & (original description: transcript offset:0 AED:0.20 eAED:0.21 QI:0|0|0|0.5|1|1|2|0|208)	NA	0.112464	0.194079	0.521394	0.502239	0.687737	0.224332	2.31768	3.54953	3.31426	2.16242	1.76824	4.43535	2.22045	0	0
Dm_00006462-RA	NA	NA	not assigned.unknown	NA	no hits & (original description: transcript offset:0 AED:0.67 eAED:0.68 QI:0|-1|0|1|-1|1|1|0|86)	NA	0.0925357	0.174506	0.660859	0.370453	0.31076	0.0654753	2.29525	3.69032	5.3418	NA	2.8967	4.49207	2.75893	0	0
Dm_00020372-RA		Auxin-responsive family protein	hormone metabolism.auxin.induced-regulated-responsive-activated	AT3G25290	(loc_os09g32470.1 : 137.0) no description available & (at3g25290 : 127.0) Auxin-responsive family protein; INVOLVED IN: multicellular organismal development; LOCATED IN: plasma membrane, membrane; EXPRESSED IN: 19 plant structures; EXPRESSED DURING: 9 growth stages; CONTAINS InterPro DOMAIN/s: Cytochrome b561, eukaryote (InterPro:IPR004877), Uncharacterised conserved protein UCP037471 (InterPro:I…	NA	0.383904	0.276754	0	0.0138726	0.648256	0.082552	2.29016	3.04704	4.77567	8.18886	NA	2.5817	7.30693	0	0
Dm_00019363-RA	NA	NA	not assigned.unknown	NA	no hits & (original description: transcript offset:0 AED:0.44 eAED:0.44 QI:0|0|0|1|1|1|2|0|322)	NA	0.431935	0.00593689	0.703174	0.435202	0.567476	0.348885	2.28441	8.29381	2.68426	1.74047	2.04065	2.35885	2.34566	0	0
Dm_00006030-RA	NA	NA	not assigned.unknown	NA	no hits & (original description: transcript offset:0 AED:0.45 eAED:0.45 QI:0|0|0|0.5|0|0|2|0|111)	NA	0.155012	0.152425	0	0.539779	0.0600571	0	2.23315	3.84563	6.64428	6.9033	5.39521	3.8238	NA	0	0
Dm_00005394-RA	NA	NA	not assigned.unknown	NA	(loc_os02g10280.1 : 83.6) no description available & (reliability: 100.0) & (original description: transcript offset:0 AED:0.18 eAED:0.21 QI:0|0|0|0.33|1|1|3|0|145)	NA	0.210122	0.194802	0.0836371	0.370721	0.414619	0.159045	2.17615	3.47023	3.80573	4.8686	NA	3.34848	NA	0	0
Dm_00008199-RA		hAT dimerization domain-containing protein / transposase-like protein	DNA.synthesis/chromatin structure.retrotransposon/transposase.hat-like transposase	AT5G33406	(at5g33406 : 89.0) hAT dimerisation domain-containing protein / transposase-related; FUNCTIONS IN: protein dimerization activity; INVOLVED IN: biological_process unknown; LOCATED IN: mitochondrion; CONTAINS InterPro DOMAIN/s: HAT dimerisation (InterPro:IPR008906); BEST Arabidopsis thaliana protein match is: hAT transposon superfamily (TAIR:AT4G15020.2); Has 707 Blast hits to 681 proteins in 26 sp…	NA	0.179063	0.158535	0.193145	0.192569	0.322499	0.0334497	2.1751	3.7885	5.95602	3.45933	2.77239	3.69953	3.42751	0	0
Dm_00007735-RA		hAT dimerization domain-containing protein / transposase-like protein	DNA.synthesis/chromatin structure.retrotransposon/transposase.hat-like transposase	AT5G33406	(at5g33406 : 141.0) hAT dimerisation domain-containing protein / transposase-related; FUNCTIONS IN: protein dimerization activity; INVOLVED IN: biological_process unknown; LOCATED IN: mitochondrion; CONTAINS InterPro DOMAIN/s: HAT dimerisation (InterPro:IPR008906); BEST Arabidopsis thaliana protein match is: hAT transposon superfamily (TAIR:AT4G15020.2); Has 707 Blast hits to 681 proteins in 26 s…	NA	0.0208094	0.047319	0.0897885	0.166542	0.127419	0.180373	2.17187	5.42588	3.57447	5.03089	4.02044	6.25556	3.61988	0	0
Dm_00005076-RA		hAT transposon superfamily	RNA.regulation of transcription.putative transcription regulator	AT4G15020	(loc_os12g35120.1 : 207.0) no description available & (at4g15020 : 184.0) hAT transposon superfamily; FUNCTIONS IN: protein dimerization activity, DNA binding; INVOLVED IN: biological_process unknown; LOCATED IN: cellular_component unknown; EXPRESSED IN: 19 plant structures; EXPRESSED DURING: 8 growth stages; CONTAINS InterPro DOMAIN/s: HAT dimerisation (InterPro:IPR008906), Zinc finger, BED-type…	NA	0.12991	0.2995	0.652467	0.669915	0.719948	0.178657	2.159	2.84628	3.59484	1.75676	1.56676	4.10269	1.71454	0	0
Dm_00006241-RA		hAT dimerization domain-containing protein	RNA.regulation of transcription.putative transcription regulator, DNA.unspecified	AT3G17450	(at3g17450 : 147.0) hAT dimerisation domain-containing protein; FUNCTIONS IN: protein dimerization activity, DNA binding; INVOLVED IN: biological_process unknown; LOCATED IN: cellular_component unknown; EXPRESSED IN: 22 plant structures; EXPRESSED DURING: 14 growth stages; CONTAINS InterPro DOMAIN/s: HAT dimerisation (InterPro:IPR008906), Zinc finger, BED-type predicted (InterPro:IPR003656), Prot…	NA	0.199704	0.21317	0.297526	0.59058	0.349733	0.105304	2.14201	3.34655	4.39881	2.81892	2.6551	3.3325	NA	0	0
Dm_00011224-RA	NA	NA	not assigned.unknown	NA	(loc_os01g33990.1 : 119.0) no description available & (reliability: 100.0) & (original description: transcript offset:0 AED:0.30 eAED:0.34 QI:0|0|0|1|0|0|3|0|177)	NA	0.293898	0.245608	0.452164	0.425226	0.339644	0.0962355	2.13638	3.14632	4.41838	2.24091	2.67445	2.91742	2.26334	0	0
Dm_00007852-RA	NA	NA	not assigned.unknown	NA	(loc_os05g24790.1 : 90.1) no description available & (reliability: 100.0) & (original description: transcript offset:0 AED:0.42 eAED:0.54 QI:0|0|0|1|0|0|2|0|111)	NA	0.289105	0.173229	0.118494	0.209474	0.266165	0.0849713	2.11523	3.60038	4.71885	3.90597	2.93881	NA	3.45111	0	0
Dm_00008021-RA	NA	NA	not assigned.unknown	NA	no hits & (original description: transcript offset:0 AED:0.52 eAED:0.52 QI:0|0|0|0.5|1|1|2|0|237)	NA	0.0447798	0.3763	0.490949	0.544015	0.642233	0.104602	2.11264	2.50027	4.24307	2.02221	1.71103	5.26647	1.94807	0	0
Dm_00018522-RA		DNAse I-like superfamily protein	not assigned.unknown	AT1G43760	(at1g43760 : 139.0) DNAse I-like superfamily protein; CONTAINS InterPro DOMAIN/s: Endonuclease/exonuclease/phosphatase (InterPro:IPR005135), RNA-directed DNA polymerase (reverse transcriptase), related (InterPro:IPR015706); BEST Arabidopsis thaliana protein match is: DNAse I-like superfamily protein (TAIR:AT1G40390.1); Has 1816 Blast hits to 1744 proteins in 56 species: Archae - 0; Bacteria - 6; …	NA	0.048226	0.129133	0.214815	0.237041	0.214272	0.0586967	2.10863	4.02646	5.12388	3.33558	3.33445	5.3951	3.13079	0	0
Dm_00010847-RA	NA	NA	not assigned.unknown	NA	no hits & (original description: transcript offset:0 AED:0.61 eAED:0.61 QI:0|0|0|0.5|0|0.5|2|0|89)	NA	0	0.298851	0.555325	0.364235	0.723945	0.0639872	2.07995	2.79891	5.23995	NA	NA	6.20468	2.44758	0	0
Dm_00011225-RA	NA	NA	not assigned.unknown	NA	no hits & (original description: transcript offset:0 AED:0.38 eAED:0.60 QI:0|0|0|1|0|0|5|0|101)	NA	0.157585	0.160751	0.376672	0.365539	0.389628	0.162324	2.05858	3.72995	3.58296	NA	NA	3.60375	NA	0	0
Dm_00014891-RA	MAN6	Glycosyl hydrolase superfamily protein	cell wall.degradation.mannan-xylose-arabinose-fucose	AT5G01930	(at5g01930 : 117.0) Glycosyl hydrolase superfamily protein; FUNCTIONS IN: cation binding, hydrolase activity, hydrolyzing O-glycosyl compounds, catalytic activity; INVOLVED IN: carbohydrate metabolic process; LOCATED IN: endomembrane system; EXPRESSED IN: 19 plant structures; EXPRESSED DURING: 10 growth stages; CONTAINS InterPro DOMAIN/s: Glycoside hydrolase, catalytic core (InterPro:IPR017853), …	NA	0.611657	0.36209	0.0766044	0.408403	0.296482	0.461427	2.04179	2.49008	2.18759	4.14999	2.81106	NA	2.30204	0	0
Dm_00010523-RA	NA	NA	not assigned.unknown	NA	no hits & (original description: transcript offset:0 AED:0.59 eAED:0.59 QI:0|0|0|1|0|0|2|0|214)	NA	0.109311	0.054287	0.12436	0.153847	0.154234	0.045929	2.0396	5.29036	5.59573	4.23357	3.75177	4.27113	3.76785	0	0
Dm_00008409-RA	NA	NA	not assigned.unknown	NA	no hits & (original description: transcript offset:0 AED:0.73 eAED:0.73 QI:0|0|0|0.33|0.8|0.66|6|0|237)	NA	0.178779	0.398049	0.209008	0.42329	0.467041	0.170258	2.02451	2.33318	3.70513	3.29803	2.16277	3.45898	2.30582	0	0
Dm_00003971-RA		hAT transposon superfamily protein	DNA.unspecified	AT1G43260	(loc_os01g52430.1 : 91.3) no description available & (at1g43260 : 85.9) hAT transposon superfamily protein; CONTAINS InterPro DOMAIN/s: Protein of unknown function DUF659 (InterPro:IPR007021); BEST Arabidopsis thaliana protein match is: hAT transposon superfamily protein (TAIR:AT5G31412.1); Has 599 Blast hits to 592 proteins in 25 species: Archae - 0; Bacteria - 0; Metazoa - 11; Fungi - 2; Plants…	NA	0.242293	0.0360713	0.0232936	0.0987738	0.078966	0	2.01682	5.7453	7.51404	6.79127	4.69408	NA	4.41735	0	0
Dm_00010745-RA	NA	NA	not assigned.unknown	NA	(loc_os01g40770.1 : 99.0) no description available & (reliability: 100.0) & (original description: transcript offset:0 AED:0.39 eAED:0.39 QI:0|-1|0|1|-1|1|1|0|197)	NA	0.407342	0.0430329	0.250878	0.168421	0.363402	0.0884806	2.00907	5.50415	4.47628	3.08136	2.44751	2.30705	3.5355	0	0
Dm_00008247-RA	NA	NA	not assigned.unknown	NA	no hits & (original description: transcript offset:0 AED:0.86 eAED:0.86 QI:0|-1|0|1|-1|1|1|0|155)	NA	0.17637	0.583732	0.295239	0.331987	0.578073	0.0541669	1.9912	1.77029	5.1188	2.85284	1.79989	3.53306	2.57684	0	0
Dm_00015474-RA	NA	NA	not assigned.unknown	NA	(loc_os07g28210.1 : 111.0) no description available & (reliability: 100.0) & (original description: transcript offset:0 AED:0.21 eAED:0.21 QI:0|-1|0|1|-1|1|1|0|269)	NA	0.11985	0.186814	0.356741	0.328704	0.346193	0.0297356	1.97968	3.40064	5.90706	2.55879	2.53938	3.93111	2.53943	0	0
Dm_00010100-RA		hAT transposon superfamily	RNA.regulation of transcription.putative transcription regulator	AT1G79740	(loc_os08g19870.1 : 387.0) no description available & (at1g79740 : 110.0) hAT transposon superfamily; FUNCTIONS IN: protein dimerization activity, DNA binding; INVOLVED IN: biological_process unknown; LOCATED IN: cellular_component unknown; CONTAINS InterPro DOMAIN/s: HAT dimerisation (InterPro:IPR008906), Zinc finger, BED-type predicted (InterPro:IPR003656), Protein of unknown function DUF659 (I…	NA	0.154398	0.237665	0.541375	0.322331	0.626333	0.186877	1.96317	3.03829	3.44655	1.86197	1.65914	3.55456	2.5605	0	0
Dm_00003758-RA	NA	NA	not assigned.unknown	NA	no hits & (original description: transcript offset:0 AED:0.64 eAED:0.64 QI:0|0|0|0.5|1|1|2|0|55)	NA	0.697296	0	0.0877914	0.225304	0.164309	0	1.96242	6.49096	NA	NA	NA	NA	NA	0	0
Dm_00012293-RA	NA	NA	not assigned.unknown	NA	no hits & (original description: transcript offset:0 AED:0.66 eAED:0.74 QI:0|0|0|0.75|0|0.25|4|0|140)	NA	0.0884181	0.210278	0.116354	0.139365	0.16572	0.0271495	1.94864	3.22274	5.8121	4.01251	3.54723	4.37735	3.90985	0	0
Dm_00012360-RA	FRS5	FAR1-related sequence 5	signalling.light	AT4G38180	(at4g38180 : 223.0) FAR1-related sequence 5 (FRS5); FUNCTIONS IN: zinc ion binding; INVOLVED IN: response to red or far red light; LOCATED IN: cellular_component unknown; EXPRESSED IN: 22 plant structures; EXPRESSED DURING: 13 growth stages; CONTAINS InterPro DOMAIN/s: MULE transposase, conserved domain (InterPro:IPR018289), Transcription factor, FAR1-related (InterPro:IPR004330), Zinc finger, PM…	NA	0.112144	0.327041	0.505279	0.378477	0.489923	0.107003	1.94413	2.57718	4.08657	1.94017	2.0116	4.08246	2.32995	0	0
Dm_00020761-RA	NA	NA	not assigned.unknown	NA	no hits & (original description: transcript offset:0 AED:0.44 eAED:0.44 QI:0|0|0|0.5|1|1|2|0|115)	NA	0.21882	0.0401599	0.0542892	0.0739253	0.221814	0.0730075	1.92143	5.6373	4.64568	4.61038	NA	NA	4.92122	0	0
Dm_00009284-RA	NA	NA	not assigned.unknown	NA	no hits & (original description: transcript offset:0 AED:0.64 eAED:0.75 QI:0|0|0|0.66|0|0|3|0|91)	NA	0.0874513	0.169286	0.110399	0.0275639	0.219769	0.217568	1.92019	NA	NA	NA	NA	NA	5.51143	0	0
Dm_00007122-RA	NA	NA	not assigned.unknown	NA	no hits & (original description: transcript offset:0 AED:0.86 eAED:0.90 QI:0|0|0|0.4|0|0|5|0|283)	NA	0.0982789	0.688382	0.0883503	0.213148	0.254534	0.0579319	1.89875	1.46387	4.92874	4.19068	2.86058	4.32627	3.13705	0	0
Dm_00016280-RA	FRS5	FAR1-related sequence 5	signalling.light, DNA.unspecified	AT4G38180	(loc_os03g37920.1 : 138.0) no description available & (at4g38180 : 137.0) FAR1-related sequence 5 (FRS5); FUNCTIONS IN: zinc ion binding; INVOLVED IN: response to red or far red light; LOCATED IN: cellular_component unknown; EXPRESSED IN: 22 plant structures; EXPRESSED DURING: 13 growth stages; CONTAINS InterPro DOMAIN/s: MULE transposase, conserved domain (InterPro:IPR018289), Transcription fact…	NA	0.17637	0.246005	0.281619	0.522029	0.358073	0.153907	1.88895	2.91317	3.69774	2.65758	2.35745	3.45533	NA	0	0
Dm_00008446-RA		hAT dimerization domain-containing protein / transposase-like protein	DNA.synthesis/chromatin structure.retrotransposon/transposase.hat-like transposase	AT5G33406	(at5g33406 : 284.0) hAT dimerisation domain-containing protein / transposase-related; FUNCTIONS IN: protein dimerization activity; INVOLVED IN: biological_process unknown; LOCATED IN: mitochondrion; CONTAINS InterPro DOMAIN/s: HAT dimerisation (InterPro:IPR008906); BEST Arabidopsis thaliana protein match is: hAT transposon superfamily (TAIR:AT4G15020.2); Has 707 Blast hits to 681 proteins in 26 s…	NA	0.0640136	0.344434	0.256573	0.56598	0.390979	0.0329603	1.88731	2.45735	5.67217	2.77166	2.27522	4.93415	1.73772	0	0
Dm_00003230-RA	NA	NA	not assigned.unknown	NA	no hits & (original description: transcript offset:0 AED:0.39 eAED:0.45 QI:0|0|0|1|0|0|2|0|323)	NA	0.154094	0.294417	0.347879	0.250781	0.342274	0.120927	1.87737	2.68522	3.92965	2.48651	2.4349	3.76034	2.88816	0	0
Dm_00019178-RA	NA	NA	not assigned.unknown	NA	(loc_os06g28850.1 : 85.1) no description available & (reliability: 100.0) & (original description: transcript offset:0 AED:0.65 eAED:0.65 QI:0|0|0|0.33|1|1|3|0|273)	NA	0.0824527	0.262838	0.170368	0.15735	0.250267	0.060054	1.87053	2.82934	4.86517	3.38331	2.94894	4.52663	3.53822	0	0
Dm_00017583-RA	NA	NA	not assigned.unknown	NA	(loc_os02g49120.1 : 135.0) no description available & (reliability: 100.0) & (original description: transcript offset:0 AED:0.15 eAED:0.15 QI:0|0|0|0.2|1|1|5|0|354)	NA	0.0774345	0.173349	0.229762	0.113837	0.135604	0.141028	1.86327	3.43452	3.75625	3.01036	3.75492	4.442	4.1131	0	0
Dm_00006949-RA	NA	NA	not assigned.unknown	NA	no hits & (original description: transcript offset:0 AED:0.95 eAED:0.95 QI:0|-1|0|1|-1|1|1|0|158)	NA	0.114488	0.155707	0.564341	0.272547	0.353715	0	1.85774	3.52042	6.88125	NA	2.35823	4.04246	2.73771	0	0
Dm_00019321-RA	NA	NA	not assigned.unknown	NA	no hits & (original description: transcript offset:0 AED:0.12 eAED:0.24 QI:0|0|0|1|1|1|2|0|116)	NA	0.0381074	0.189404	0.116742	0.38185	0.13205	0.0361891	1.84558	3.28116	5.46252	3.73859	3.85621	5.46545	NA	0	0
Dm_00006033-RA	RLP7	receptor like protein 7	stress.biotic.PR-proteins	AT1G47890	(at1g47890 : 137.0) receptor like protein 7 (RLP7); FUNCTIONS IN: kinase activity; INVOLVED IN: signal transduction, defense response; LOCATED IN: endomembrane system; EXPRESSED IN: stem, stamen; EXPRESSED DURING: 4 anthesis; CONTAINS InterPro DOMAIN/s: Leucine-rich repeat-containing N-terminal domain, type 2 (InterPro:IPR013210), Leucine-rich repeat (InterPro:IPR001611); BEST Arabidopsis thalian…	NA	0.325333	0.441305	0.101727	0.637349	0.389654	0.0269282	1.8405	2.04934	6.21935	4.08793	2.24569	2.46903	NA	0	0
Dm_00006463-RA	NA	NA	not assigned.unknown	NA	(loc_os01g27900.1 : 105.0) no description available & (reliability: 100.0) & (original description: transcript offset:0 AED:0.16 eAED:0.16 QI:0|-1|0|1|-1|1|1|0|191)	NA	0.0648091	0.232704	0.362776	0.174496	0.179177	0.0398003	1.77724	2.93465	5.27215	2.15255	3.28932	4.6854	3.22857	0	0
Dm_00020317-RA	NA	NA	not assigned.unknown	NA	(loc_os07g09770.1 : 96.3) no description available & (reliability: 100.0) & (original description: transcript offset:0 AED:0.36 eAED:0.36 QI:0|-1|0|1|-1|1|1|0|188)	NA	0	0.17343	0.379905	0.283133	0.481856	0.40296	1.76439	3.34829	2.13963	2.2557	1.85976	7.06864	2.61795	0	0
Dm_00005433-RA	NA	NA	not assigned.unknown	NA	no hits & (original description: transcript offset:0 AED:0.71 eAED:0.71 QI:0|-1|0|1|-1|1|1|0|131)	NA	0.175506	0.307065	0.15612	0.21498	0.360076	0.197149	1.75063	2.51733	3.10739	3.31613	2.28696	3.15643	3.0408	0	0
Dm_00020290-RA	NA	NA	not assigned.unknown	NA	no hits & (original description: transcript offset:0 AED:0.70 eAED:0.70 QI:0|-1|0|1|-1|1|1|0|152)	NA	0.029082	0.111311	0.041074	0.33825	0.278741	0.0740905	1.74801	3.94551	4.81365	4.87341	NA	5.77831	NA	0	0
Dm_00021100-RA		hAT transposon superfamily protein	DNA.unspecified	AT1G43260	(at1g43260 : 165.0) hAT transposon superfamily protein; CONTAINS InterPro DOMAIN/s: Protein of unknown function DUF659 (InterPro:IPR007021); BEST Arabidopsis thaliana protein match is: hAT transposon superfamily protein (TAIR:AT5G31412.1); Has 599 Blast hits to 592 proteins in 25 species: Archae - 0; Bacteria - 0; Metazoa - 11; Fungi - 2; Plants - 577; Viruses - 0; Other Eukaryotes - 9 (source: N…	NA	0.176746	0.134482	0.101246	0.212656	0.18117	0.0811621	1.74213	3.72478	4.31954	3.92699	3.2307	3.31418	2.99306	0	0
Dm_00015667-RA	NA	NA	not assigned.unknown	NA	no hits & (original description: transcript offset:0 AED:0.37 eAED:0.45 QI:0|0|0|1|1|1|2|0|133)	NA	0.129371	0.725593	0.17443	0.257604	0.304559	0	1.74028	NA	6.53324	3.27595	NA	3.71409	2.82944	0	0
Dm_00007101-RA	NA	NA	not assigned.unknown	NA	no hits & (original description: transcript offset:0 AED:0.20 eAED:0.30 QI:0|-1|0|1|-1|1|1|0|118)	NA	0.209175	0.22961	0.0352726	0.445629	0.266158	0.138938	1.71403	2.92536	3.53034	4.94417	2.75507	3.15079	NA	0	0
Dm_00020458-RA	NA	NA	not assigned.unknown	NA	(loc_os09g03160.1 : 214.0) no description available & (reliability: 100.0) & (original description: transcript offset:0 AED:0.23 eAED:0.23 QI:0|0|0|0.66|0|0|3|0|429)	NA	0.160966	0.16858	0.332812	0.183645	0.427067	0.0327728	1.7114	3.34676	5.77949	2.33819	2.01535	3.38351	3.22048	0	0
Dm_00014005-RA	NA	NA	not assigned.unknown	NA	(p10978|polx_tobac : 117.0) Retrovirus-related Pol polyprotein from transposon TNT 1-94 [Includes: Protease (EC 3.4.23.-); Reverse transcriptase (EC 2.7.7.49); Endonuclease] - Nicotiana tabacum (Common tobacco) & (loc_os06g47070.1 : 99.0) no description available & (reliability: 100.0) & (original description: transcript offset:0 AED:0.24 eAED:0.24 QI:0|0|0|1|1|1|2|0|253)	NA	0.302783	0.314536	0.340286	0.475273	0.397282	0.076431	1.68744	2.44391	4.56854	2.31681	2.13274	2.49563	1.85722	0	0
Dm_00018293-RA	NA	NA	not assigned.unknown	NA	no hits & (original description: transcript offset:0 AED:0.84 eAED:0.84 QI:0|0|0|0.16|1|1|6|0|568)	NA	0.166887	0.0604633	0.163862	0.274668	0.273505	0.0860706	1.68657	4.78853	4.29513	3.3639	2.621	3.39702	2.59838	0	0
Dm_00010380-RA		hAT dimerization domain-containing protein / transposase-like protein	DNA.synthesis/chromatin structure.retrotransposon/transposase.hat-like transposase	AT5G33406	(at5g33406 : 229.0) hAT dimerisation domain-containing protein / transposase-related; FUNCTIONS IN: protein dimerization activity; INVOLVED IN: biological_process unknown; LOCATED IN: mitochondrion; CONTAINS InterPro DOMAIN/s: HAT dimerisation (InterPro:IPR008906); BEST Arabidopsis thaliana protein match is: hAT transposon superfamily (TAIR:AT4G15020.2); Has 707 Blast hits to 681 proteins in 26 s…	NA	0.156887	0.307254	0.664348	0.64839	0.758291	0.181615	1.67484	2.4425	3.2022	NA	NA	3.4771	NA	0	0
Dm_00009671-RA	NA	NA	not assigned.unknown	NA	no hits & (original description: transcript offset:0 AED:0.67 eAED:0.67 QI:0|0|0|0.33|1|1|3|0|198)	NA	0.0178667	0.271827	0.415551	0.347053	0.401973	0.0568775	1.64877	2.57593	5.1629	NA	NA	6.08591	2.25247	0	0
Dm_00008934-RA	NA	NA	not assigned.unknown	NA	no hits & (original description: transcript offset:0 AED:0.89 eAED:0.89 QI:0|0|0|0.33|0|0.33|3|0|231)	NA	0.362997	0.0896401	0.253358	0.451126	0.425325	0.0726915	1.64789	4.15215	4.43168	2.70048	1.96692	2.1785	NA	0	0
Dm_00020929-RA	NA	NA	not assigned.unknown	NA	(loc_os09g14470.1 : 110.0) no description available & (reliability: 100.0) & (original description: transcript offset:0 AED:0.49 eAED:0.49 QI:0|0|0|0.5|0|0.5|2|0|415)	NA	0.122551	0.247828	0.466194	0.377201	0.497984	0.0639263	1.6476	2.73269	4.68337	1.7948	1.71397	3.7069	2.09142	0	0
Dm_00011067-RA	NA	NA	not assigned.unknown	NA	no hits & (original description: transcript offset:0 AED:0.89 eAED:0.95 QI:0|0|0|0.15|0.75|0.84|13|0|340)	NA	0.0234061	0.150562	0.135409	0.199676	0.298572	0.0678281	1.63663	3.42144	4.6299	3.73127	2.43373	5.98918	2.96139	0	0
Dm_00013188-RA	NA	NA	not assigned.unknown	NA	no hits & (original description: transcript offset:0 AED:0.44 eAED:0.78 QI:0|0|0|1|0|0|2|0|79)	NA	0.0447798	0	0.0660476	0.0317508	0	0.0481131	1.6275	NA	NA	NA	NA	NA	NA	0	0
Dm_00010352-RA	CRN	Protein kinase superfamily protein	signalling.receptor kinases.misc	AT5G13290	(at5g13290 : 157.0) Encodes a protein with predicted Ser/Thr kinase activity and membrane localization that is involved in the CLV3 signaling pathway that represses WUS expression in the meristem. Loss of function of CRN can suppress the phenotype caused by overexpression of CLV3. SOL2 isolated as a suppressor of root- specific overexpression of CLE19, a clavata3 like gene. sol2 partially suppres…	NA	0.158024	0.226595	0.176893	0.340085	0.128723	0.0323484	1.61828	2.84327	5.43824	3.13004	3.69658	3.28078	2.19671	0	0
Dm_00011760-RA		Tetratricopeptide repeat (TPR)-like superfamily protein	not assigned.no ontology.pentatricopeptide (PPR) repeat-containing protein	AT1G16480	(at1g16480 : 991.0) Tetratricopeptide repeat (TPR)-like superfamily protein; FUNCTIONS IN: molecular_function unknown; INVOLVED IN: biological_process unknown; LOCATED IN: cellular_component unknown; EXPRESSED IN: shoot apex; CONTAINS InterPro DOMAIN/s: Pentatricopeptide repeat (InterPro:IPR002885); BEST Arabidopsis thaliana protein match is: Pentatricopeptide repeat (PPR) superfamily protein (TA…	NA	0.63163	0.69685	0.513224	0.724799	0.45802	0.540206	1.61783	1.20829	1.56734	1.60944	1.79137	1.35614	1.14138	0	0
Dm_00002916-RA	NA	NA	not assigned.unknown	NA	(loc_os02g49120.1 : 93.6) no description available & (reliability: 100.0) & (original description: transcript offset:0 AED:0.07 eAED:0.07 QI:0|0|0|1|0|0.5|2|0|146)	NA	0.0302771	0	0.042762	0.0666685	0.0886788	0	1.61591	7.60954	6.57038	NA	NA	NA	NA	0	0
Dm_00018345-RA	DAYSLEEPER	BED zinc finger and hAT dimerization domain-containing protein DAYSLEEPER	DNA.unspecified	AT3G42170	(loc_os02g08340.1 : 137.0) no description available & (at3g42170 : 127.0) transposase-like gene with conserved domains from the family of hAT transposases that includes hobo from Drosophila melanogaster, Activator (Ac) from maize, and Tam3 from snapdragon but lacks several amino acids known to be essential for Ac transposition5. The DAYSLEEPER gene lacks 8 bp duplications and TIRs (a common featu…	NA	0.22814	0.437357	0.726162	0.777157	0.411846	0.470686	1.61577	1.9059	1.77404	1.16065	1.96714	2.84407	1.07419	0	0
Dm_00007854-RA	NA	NA	not assigned.unknown	NA	no hits & (original description: transcript offset:0 AED:0.76 eAED:0.76 QI:0|0|0|0.5|0|0|2|0|137)	NA	0.0997713	0.219871	0.118902	0.0885841	0.146416	0.17123	1.59871	2.84763	3.27691	3.69312	3.43719	4.03812	4.35358	0	0
Dm_00005901-RA	NA	NA	not assigned.unknown	NA	(loc_os04g19260.1 : 118.0) no description available & (reliability: 100.0) & (original description: transcript offset:0 AED:0.92 eAED:0.92 QI:0|-1|0|1|-1|1|1|0|210)	NA	0.321595	0.213351	0.136638	0.292102	0.260035	0.0380898	1.59305	2.87834	5.2415	3.74401	2.65658	2.26254	2.43806	0	0
Dm_00007051-RA		hAT transposon superfamily protein	DNA.unspecified, RNA.regulation of transcription.putative transcription regulator	AT1G43260	(loc_os05g16730.1 : 146.0) no description available & (at1g43260 : 118.0) hAT transposon superfamily protein; CONTAINS InterPro DOMAIN/s: Protein of unknown function DUF659 (InterPro:IPR007021); BEST Arabidopsis thaliana protein match is: hAT transposon superfamily protein (TAIR:AT5G31412.1); Has 599 Blast hits to 592 proteins in 25 species: Archae - 0; Bacteria - 0; Metazoa - 11; Fungi - 2; Plan…	NA	0.115955	0.0639543	0.0869396	0.136995	0.159946	0.0780693	1.58714	4.62731	4.34111	4.37161	3.33499	3.75902	3.55832	0	0
Dm_00013351-RA	NA	NA	not assigned.unknown	NA	(loc_os08g25640.1 : 95.5) no description available & (reliability: 100.0) & (original description: transcript offset:0 AED:0.38 eAED:0.38 QI:0|0|0|0.33|1|1|3|0|299)	NA	0.0266156	0.27074	0.282617	0.300553	0.391823	0.0254243	1.57338	2.51934	5.73733	2.61318	2.01334	5.74427	2.36477	0	0
Dm_00013419-RA	MEF7	Tetratricopeptide repeat (TPR)-like superfamily protein	not assigned.no ontology.pentatricopeptide (PPR) repeat-containing protein	AT5G09950	(at5g09950 : 1160.0) Tetratricopeptide repeat (TPR)-like superfamily protein; CONTAINS InterPro DOMAIN/s: Pentatricopeptide repeat (InterPro:IPR002885); BEST Arabidopsis thaliana protein match is: Tetratricopeptide repeat (TPR)-like superfamily protein (TAIR:AT1G16480.1); Has 58090 Blast hits to 13690 proteins in 227 species: Archae - 0; Bacteria - 7; Metazoa - 25; Fungi - 46; Plants - 57493; Vir…	NA	0.221708	0.580116	0.394259	0.38293	0.383057	0.17337	1.56999	1.43627	3.21826	1.98654	2.03886	2.79678	1.97207	0	0
Dm_00012204-RA		rRNA processing protein-like protein	protein.synthesis.ribosome biogenesis.Pre-rRNA processing and modifications.misc	AT3G22660	(at3g22660 : 88.2) rRNA processing protein-related; CONTAINS InterPro DOMAIN/s: Eukaryotic rRNA processing (InterPro:IPR008610); Has 1021 Blast hits to 939 proteins in 244 species: Archae - 0; Bacteria - 62; Metazoa - 355; Fungi - 209; Plants - 58; Viruses - 0; Other Eukaryotes - 337 (source: NCBI BLink). & (loc_os07g29320.1 : 84.7) no description available & (reliability: 176.4) & (original desc…	NA	0.101576	0.151379	0.0819417	0.45669	0.284499	0.0920929	1.5646	3.37854	4.10213	4.43597	2.41903	3.74266	NA	0	0
Dm_00007343-RA	NA	NA	not assigned.unknown	NA	(loc_os11g09950.1 : 87.0) no description available & (reliability: 100.0) & (original description: transcript offset:0 AED:0.22 eAED:0.22 QI:0|-1|0|1|-1|1|1|0|115)	NA	0.0384388	0.11042	0.273404	0.192776	0.341649	0	1.55456	3.78014	6.16148	NA	NA	5.20261	NA	0	0
Dm_00017199-RA	NA	NA	not assigned.unknown	NA	no hits & (original description: transcript offset:0 AED:0.40 eAED:0.40 QI:0|-1|0|1|-1|1|1|0|95)	NA	0.251307	0.0691136	0.208584	0.115892	0.297525	0.0883776	1.5525	4.48014	NA	NA	NA	NA	NA	0	0
Dm_00000534-RA	NA	NA	not assigned.unknown	NA	no hits & (original description: transcript offset:0 AED:0.77 eAED:0.78 QI:0|-1|0|1|-1|1|1|0|83)	NA	0.180227	0.532863	0.229361	0.325736	0.393776	0.437281	1.54379	NA	NA	NA	NA	NA	NA	0	0
Dm_00016692-RA	NA	NA	not assigned.unknown	NA	no hits & (original description: transcript offset:0 AED:0.38 eAED:0.39 QI:0|0|0|1|1|1|3|0|82)	NA	0.522515	0.222182	0.176653	0.314146	0.565107	0.0975472	1.54354	NA	NA	NA	NA	NA	NA	0	0
Dm_00013420-RA	DAYSLEEPER	BED zinc finger and hAT dimerization domain-containing protein DAYSLEEPER	DNA.unspecified	AT3G42170	(loc_os10g02910.1 : 259.0) no description available & (p08770|tra1_maize : 163.0) Putative AC transposase (ORFA) - Zea mays (Maize) & (at3g42170 : 127.0) transposase-like gene with conserved domains from the family of hAT transposases that includes hobo from Drosophila melanogaster, Activator (Ac) from maize, and Tam3 from snapdragon but lacks several amino acids known to be essential for Ac tran…	NA	0.0254655	0.0295342	0.0628292	0.215647	0.179808	0.047375	1.53	5.71912	5.02603	4.52399	3.09002	6.01338	2.83015	0	0
Dm_00002980-RA	AT-P4H-1	P4H isoform 1	misc.oxidases - copper, flavone etc	AT2G43080	(at2g43080 : 83.6) Encodes a prolyl-4 hydroxylase that can hydroxylate poly(L-proline),the collagen model peptide (Pro-Pro-Gly)10 and other proline rich peptides.; P4H isoform 1 (AT-P4H-1); FUNCTIONS IN: oxidoreductase activity, acting on paired donors, with incorporation or reduction of molecular oxygen, 2-oxoglutarate as one donor, and incorporation of one atom each of oxygen into both donors, …	NA	0.356699	0.706899	0.335356	0.340986	0.492298	0.486448	1.52631	NA	NA	NA	NA	NA	NA	0	0
Dm_00007052-RA	NA	NA	not assigned.unknown	NA	no hits & (original description: transcript offset:0 AED:0.57 eAED:0.57 QI:0|-1|0|1|-1|1|1|0|208)	NA	0.15464	0.08568	0.194385	0.190277	0.283477	0.0201824	1.52435	4.17475	6.03944	3.08927	2.43974	3.34778	2.91407	0	0
Dm_00017951-RA	NA	NA	not assigned.unknown	NA	(loc_os11g38750.1 : 82.4) no description available & (reliability: 100.0) & (original description: transcript offset:0 AED:0.32 eAED:0.32 QI:0|0|0|0.5|1|1|2|0|213)	NA	0.0475637	0.148025	0.0519802	0.455121	0.152866	0.0356895	1.52243	3.3303	5.21496	4.63307	3.39507	5.15981	NA	0	0
Dm_00013805-RA	NA	NA	not assigned.unknown	NA	(loc_os12g24920.1 : 119.0) no description available & (reliability: 100.0) & (original description: transcript offset:0 AED:0.32 eAED:0.32 QI:0|0|0|0.66|1|1|3|0|482)	NA	0.13093	0.146024	0.125165	0.208004	0.273791	0.0805339	1.52147	3.38563	4.20599	3.54275	2.50494	3.55581	2.89545	0	0
Dm_00020115-RA	EXPA11	expansin 11	cell wall.modification	AT1G20190	(q4pr52|exp13_orysa : 155.0) Expansin-A13 precursor (OsEXPA13) (Alpha-expansin-13) (OsEXP13) (OsaEXPa1.13) - Oryza sativa (Rice) & (loc_os02g16730.1 : 155.0) no description available & (at1g20190 : 154.0) member of Alpha-Expansin Gene Family. Naming convention from the Expansin Working Group (Kende et al, 2004. Plant Mol Bio); expansin 11 (EXPA11); INVOLVED IN: plant-type cell wall modification i…	NA	0.0641375	0.0779444	0.0358011	0.132923	0.215531	0.0590819	1.50713	4.25702	4.49304	5.39209	2.86367	4.47231	3.55094	0	0
Dm_00010522-RA		hAT dimerization domain-containing protein / transposase-like protein	DNA.synthesis/chromatin structure.retrotransposon/transposase.hat-like transposase	AT5G33406	(at5g33406 : 257.0) hAT dimerisation domain-containing protein / transposase-related; FUNCTIONS IN: protein dimerization activity; INVOLVED IN: biological_process unknown; LOCATED IN: mitochondrion; CONTAINS InterPro DOMAIN/s: HAT dimerisation (InterPro:IPR008906); BEST Arabidopsis thaliana protein match is: hAT transposon superfamily (TAIR:AT4G15020.2); Has 707 Blast hits to 681 proteins in 26 s…	NA	0.0498664	0.0377052	0.142825	0.187498	0.221902	0.0354579	1.48137	5.31821	5.46259	3.38012	2.71428	4.70984	2.96108	0	0
Dm_00009861-RA	NA	NA	not assigned.unknown	NA	no hits & (original description: transcript offset:0 AED:0.58 eAED:0.58 QI:0|0|0|0.66|0.5|1|3|0|144)	NA	0.0887904	0.173357	0.0768874	0.143316	0.0899105	0	1.48034	3.06018	6.4239	4.03967	4.15566	4.02539	3.52777	0	0
Dm_00007643-RA		hAT transposon superfamily protein	DNA.unspecified	AT1G43260	(at1g43260 : 108.0) hAT transposon superfamily protein; CONTAINS InterPro DOMAIN/s: Protein of unknown function DUF659 (InterPro:IPR007021); BEST Arabidopsis thaliana protein match is: hAT transposon superfamily protein (TAIR:AT5G31412.1); Has 599 Blast hits to 592 proteins in 25 species: Archae - 0; Bacteria - 0; Metazoa - 11; Fungi - 2; Plants - 577; Viruses - 0; Other Eukaryotes - 9 (source: N…	NA	0.635328	0.298996	0.222536	0.199287	0.38142	0.320882	1.47613	2.30391	2.24826	2.68338	NA	NA	2.75176	0	0
Dm_00013291-RA		hAT transposon superfamily protein	DNA.unspecified	AT1G43260	(loc_os01g28200.1 : 271.0) no description available & (at1g43260 : 192.0) hAT transposon superfamily protein; CONTAINS InterPro DOMAIN/s: Protein of unknown function DUF659 (InterPro:IPR007021); BEST Arabidopsis thaliana protein match is: hAT transposon superfamily protein (TAIR:AT5G31412.1); Has 599 Blast hits to 592 proteins in 25 species: Archae - 0; Bacteria - 0; Metazoa - 11; Fungi - 2; Plan…	NA	0.191731	0.686411	0.592474	0.437112	0.45108	0.155003	1.47366	1.1081	3.33042	1.30491	1.69359	2.93634	1.75681	0	0
Dm_00007607-RA	DAYSLEEPER	BED zinc finger and hAT dimerization domain-containing protein DAYSLEEPER	DNA.unspecified	AT3G42170	(loc_os01g43010.2 : 238.0) no description available & (at3g42170 : 168.0) transposase-like gene with conserved domains from the family of hAT transposases that includes hobo from Drosophila melanogaster, Activator (Ac) from maize, and Tam3 from snapdragon but lacks several amino acids known to be essential for Ac transposition5. The DAYSLEEPER gene lacks 8 bp duplications and TIRs (a common featu…	NA	0.145915	0.110733	0.136777	0.232499	0.23222	0.173289	1.46072	3.73504	3.09548	3.35993	2.70538	3.28376	2.67604	0	0
Dm_00013358-RA	NA	NA	not assigned.unknown	NA	(loc_os03g20200.1 : 120.0) no description available & (reliability: 100.0) & (original description: transcript offset:0 AED:0.23 eAED:0.23 QI:0|0|0|0.33|1|1|3|0|245)	NA	0.0180427	0.114854	0.193689	0.0796373	0.223389	0	1.45838	3.64939	7.16042	2.94502	2.65556	6.20155	4.32147	0	0
Dm_00004557-RA		hAT transposon superfamily protein	DNA.unspecified	AT1G43260	(at1g43260 : 84.0) hAT transposon superfamily protein; CONTAINS InterPro DOMAIN/s: Protein of unknown function DUF659 (InterPro:IPR007021); BEST Arabidopsis thaliana protein match is: hAT transposon superfamily protein (TAIR:AT5G31412.1); Has 599 Blast hits to 592 proteins in 25 species: Archae - 0; Bacteria - 0; Metazoa - 11; Fungi - 2; Plants - 577; Viruses - 0; Other Eukaryotes - 9 (source: NC…	NA	0.122853	0.37065	0.209699	0.261823	0.172891	0.0491807	1.45219	1.9539	4.7568	2.78539	3.04081	3.53127	2.49454	0	0
Dm_00009487-RA		Chalcone-flavanone isomerase family protein	not assigned.unknown	AT5G66230	(at5g66230 : 97.4) Chalcone-flavanone isomerase family protein; FUNCTIONS IN: chalcone isomerase activity, intramolecular lyase activity; INVOLVED IN: cellular amino acid derivative biosynthetic process, flavonoid biosynthetic process; EXPRESSED IN: 18 plant structures; EXPRESSED DURING: 8 growth stages; CONTAINS InterPro DOMAIN/s: Chalcone isomerase, subgroup (InterPro:IPR003466), Chalcone isome…	NA	0.212623	0.260781	0.213486	0.156985	0.371425	0.0252888	1.44062	2.4626	5.63249	2.7169	NA	2.76255	3.05923	0	0
Dm_00002842-RA		diphthamide synthesis DPH2 family protein	not assigned.no ontology	AT5G62030	(at5g62030 : 95.9) diphthamide synthesis DPH2 family protein; CONTAINS InterPro DOMAIN/s: Diphthamide synthesis, DHP1 (InterPro:IPR016435), Diphthamide synthesis, DPH1/DHP2 (InterPro:IPR002728); BEST Arabidopsis thaliana protein match is: diphthamide synthesis DPH2 family protein (TAIR:AT3G59630.1); Has 1807 Blast hits to 1807 proteins in 277 species: Archae - 0; Bacteria - 0; Metazoa - 736; Fung…	NA	0.181617	0.127322	0.243075	0.497347	0.234106	0.0909393	1.43642	3.49276	4.17862	2.65746	2.53445	2.98979	NA	0	0
Dm_00015214-RA	NA	NA	not assigned.unknown	NA	no hits & (original description: transcript offset:0 AED:0.45 eAED:0.45 QI:0|0|0|1|1|1|2|0|114)	NA	0.138962	0.615167	0.0730205	0.160342	0.173125	0.036824	1.435	NA	5.07074	NA	NA	NA	NA	0	0
Dm_00020799-RA	NA	NA	not assigned.unknown	NA	no hits & (original description: transcript offset:0 AED:0.34 eAED:0.54 QI:0|0|0|0.5|1|1|2|0|264)	NA	0.148638	0.106588	0.0419386	0.145248	0.339172	0.0213291	1.43025	3.73737	6.2867	4.83729	2.10454	3.25802	3.16764	0	0
Dm_00012456-RA	NA	NA	not assigned.unknown	NA	no hits & (original description: transcript offset:0 AED:0.59 eAED:0.82 QI:0|0|0|1|0|0|5|0|398)	NA	0.176528	0.123997	0.229884	0.231718	0.330916	0.0105476	1.42883	3.51855	6.88401	2.63172	2.11849	2.96224	2.63001	0	0
Dm_00017016-RA	NA	NA	not assigned.unknown	NA	(loc_os02g27850.1 : 173.0) no description available & (reliability: 100.0) & (original description: transcript offset:0 AED:0.37 eAED:0.53 QI:0|0|0|1|0|0|3|0|332)	NA	0.0213109	0.23047	0.364604	0.173948	0.189196	0.0789866	1.41117	2.61586	4.13995	1.90264	2.97536	5.75015	2.95199	0	0
Dm_00009580-RA		TTF-type zinc finger protein with HAT dimerization domain-containing protein	DNA.synthesis/chromatin structure.retrotransposon/transposase.hat-like transposase, DNA.unspecified	AT1G19260	(loc_os01g18920.1 : 162.0) no description available & (at1g19260 : 145.0) TTF-type zinc finger protein with HAT dimerisation domain; FUNCTIONS IN: protein dimerization activity; INVOLVED IN: biological_process unknown; LOCATED IN: cellular_component unknown; CONTAINS InterPro DOMAIN/s: HAT dimerisation (InterPro:IPR008906), Zinc finger, TTF-type (InterPro:IPR006580); BEST Arabidopsis thaliana pro…	NA	0.250699	0.124018	0.129222	0.228555	0.283455	0.116994	1.39573	3.47567	3.60313	3.4064	2.30842	2.52756	2.63683	0	0
Dm_00003756-RA	NA	NA	not assigned.unknown	NA	no hits & (original description: transcript offset:0 AED:0.78 eAED:0.78 QI:0|0|0|0.33|0.5|0.66|3|0|176)	NA	0.243444	0.0664141	0.0807299	0.153614	0.194464	0.131032	1.39348	4.44915	3.44319	4.13857	2.81832	NA	3.16515	0	0
Dm_00013673-RA	NA	NA	not assigned.unknown	NA	(loc_os01g27550.1 : 122.0) no description available & (reliability: 100.0) & (original description: transcript offset:0 AED:0.05 eAED:0.05 QI:0|-1|0|1|-1|1|1|0|241)	NA	0.203707	0.401336	0.82003	0.465304	0.575212	0.34464	1.38561	1.78835	1.98217	NA	1.25794	2.89673	1.55804	0	0
Dm_00017198-RA	NA	NA	not assigned.unknown	NA	no hits & (original description: transcript offset:0 AED:0.35 eAED:0.35 QI:0|0|0|1|1|1|3|0|286)	NA	0.144802	0.0956088	0.128466	0.288581	0.35204	0.129679	1.37508	3.81192	3.43854	3.32619	NA	3.2814	NA	0	0
Dm_00015918-RA	NA	NA	not assigned.unknown	NA	no hits & (original description: transcript offset:0 AED:0.19 eAED:0.28 QI:0|0|0|1|0|0|3|0|143)	NA	0.158518	0.192816	0.085404	0	0.10246	0	1.3654	2.79321	6.28307	4.1743	3.73129	3.11826	6.62237	0	0
Dm_00010808-RA	NA	NA	not assigned.unknown	NA	no hits & (original description: transcript offset:0 AED:0.48 eAED:0.65 QI:0|0|0|0.5|1|0.5|2|0|338)	NA	0.148901	0.15284	0.0852253	0.20299	0.206879	0.0290793	1.36369	3.14136	5.68931	4.05759	2.7633	3.13481	2.7419	0	0
Dm_00010737-RA	NA	NA	not assigned.unknown	NA	no hits & (original description: transcript offset:0 AED:0.32 eAED:0.32 QI:0|0|0|1|0|0|2|0|70)	NA	0.0815801	0.153585	0.202978	0.280243	0.455032	0	1.36367	NA	NA	NA	NA	NA	NA	0	0
Dm_00017017-RA	NA	NA	not assigned.unknown	NA	(loc_os10g31990.1 : 85.5) no description available & (reliability: 100.0) & (original description: transcript offset:0 AED:0.59 eAED:0.78 QI:0|0|0|0.66|0|0|3|0|219)	NA	0.0825988	0.249248	0.548666	0.117826	0.283571	0.204065	1.36236	2.48218	2.75637	NA	2.29022	4.08366	3.48015	0	0
Dm_00007050-RA		hAT dimerization domain-containing protein / transposase-like protein	DNA.synthesis/chromatin structure.retrotransposon/transposase.hat-like transposase	AT5G33406	(at5g33406 : 202.0) hAT dimerisation domain-containing protein / transposase-related; FUNCTIONS IN: protein dimerization activity; INVOLVED IN: biological_process unknown; LOCATED IN: mitochondrion; CONTAINS InterPro DOMAIN/s: HAT dimerisation (InterPro:IPR008906); BEST Arabidopsis thaliana protein match is: hAT transposon superfamily (TAIR:AT4G15020.2); Has 707 Blast hits to 681 proteins in 26 s…	NA	0.162652	0.0817971	0.0432255	0.2433	0.338201	0.119016	1.35533	4.06749	3.47286	4.85816	2.06571	3.05879	2.50302	0	0
Dm_00017243-RA	NA	NA	not assigned.unknown	NA	no hits & (original description: transcript offset:0 AED:0.37 eAED:0.37 QI:0|0|0|0.5|0|0|2|0|75)	NA	0.335525	0.257332	0.0277478	0.325039	0.224763	0	1.35151	NA	5.35847	4.68061	NA	NA	NA	0	0
Dm_00010314-RA		hAT transposon superfamily protein	DNA.unspecified	AT1G43260	(loc_os12g35120.1 : 368.0) no description available & (at1g43260 : 292.0) hAT transposon superfamily protein; CONTAINS InterPro DOMAIN/s: Protein of unknown function DUF659 (InterPro:IPR007021); BEST Arabidopsis thaliana protein match is: hAT transposon superfamily protein (TAIR:AT5G31412.1); Has 599 Blast hits to 592 proteins in 25 species: Archae - 0; Bacteria - 0; Metazoa - 11; Fungi - 2; Plan…	NA	0.424028	0.21263	0.144712	0.130211	0.295991	0.293067	1.34529	2.64954	2.21653	3.18626	2.19717	1.65904	3.37473	0	0
Dm_00013398-RA	NA	NA	not assigned.unknown	NA	no hits & (original description: transcript offset:0 AED:0.95 eAED:0.96 QI:0|0|0|0.33|1|1|3|0|170)	NA	0.0208094	0.0659995	0.169448	0.187041	0.145531	0.113298	1.34079	4.37534	3.65972	3.03117	3.26614	5.56308	2.86396	0	0
Dm_00005711-RA	DAYSLEEPER	BED zinc finger and hAT dimerization domain-containing protein DAYSLEEPER	DNA.unspecified	AT3G42170	(loc_os10g30680.1 : 103.0) no description available & (p08770|tra1_maize : 85.9) Putative AC transposase (ORFA) - Zea mays (Maize) & (at3g42170 : 85.5) transposase-like gene with conserved domains from the family of hAT transposases that includes hobo from Drosophila melanogaster, Activator (Ac) from maize, and Tam3 from snapdragon but lacks several amino acids known to be essential for Ac transp…	NA	0.0444585	0.256763	0.102629	0.0964164	0.342311	0.0212343	1.33965	2.3893	5.63989	3.60199	NA	4.78975	3.82001	0	0
Dm_00016391-RA		PIF1 helicase	DNA.unspecified	AT5G28780	(loc_os07g09300.1 : 166.0) no description available & (at5g28780 : 125.0) PIF1 helicase; CONTAINS InterPro DOMAIN/s: DNA helicase PIF1, ATP-dependent (InterPro:IPR010285); BEST Arabidopsis thaliana protein match is: PIF1 helicase (TAIR:AT3G51690.1); Has 1364 Blast hits to 1355 proteins in 303 species: Archae - 2; Bacteria - 367; Metazoa - 234; Fungi - 111; Plants - 389; Viruses - 9; Other Eukaryo…	NA	0.0234041	0.356187	0	0.0507858	0.422353	0.040282	1.33912	1.92761	5.19985	7.30762	NA	6.08974	4.60482	0	0
Dm_00020291-RA	NA	NA	not assigned.unknown	NA	(loc_os12g21970.1 : 91.7) no description available & (reliability: 100.0) & (original description: transcript offset:0 AED:0.42 eAED:0.42 QI:0|0|0|1|1|0.5|2|0|238)	NA	0.17706	0.114019	0.0483587	0.274607	0.18793	0.0497882	1.32506	3.54786	4.58514	4.58213	2.74295	2.85214	NA	0	0
Dm_00012508-RA	NA	NA	not assigned.unknown	NA	(loc_os03g05350.1 : 132.0) no description available & (reliability: 100.0) & (original description: transcript offset:0 AED:0.42 eAED:0.42 QI:0|-1|0|1|-1|1|1|0|183)	NA	0.227116	0.0867433	0.0776419	0.128696	0.143605	0.0458791	1.30936	3.95188	4.7695	4.11604	3.29064	NA	3.22955	0	0
Dm_00005998-RA	DAYSLEEPER	BED zinc finger and hAT dimerization domain-containing protein DAYSLEEPER	DNA.unspecified	AT3G42170	(loc_os03g60730.2 : 97.1) no description available & (at3g42170 : 84.0) transposase-like gene with conserved domains from the family of hAT transposases that includes hobo from Drosophila melanogaster, Activator (Ac) from maize, and Tam3 from snapdragon but lacks several amino acids known to be essential for Ac transposition5. The DAYSLEEPER gene lacks 8 bp duplications and TIRs (a common feature…	NA	0.0948963	0.180905	0.532821	0.365168	0.276061	0.0869643	1.30761	2.8599	3.92216	NA	2.27339	3.63936	NA	0	0
Dm_00011772-RA	NA	NA	not assigned.unknown	NA	(loc_os03g20930.1 : 342.0) no description available & (reliability: 100.0) & (original description: transcript offset:0 AED:0.27 eAED:0.27 QI:0|0|0|1|0.5|0.66|3|0|342)	NA	0.133434	0.111087	0.041667	0.133638	0.371011	0.069207	1.30677	3.57528	4.10641	5.01755	NA	3.23393	3.25267	0	0
Dm_00010568-RA	NA	NA	not assigned.unknown	NA	no hits & (original description: transcript offset:0 AED:0.74 eAED:1.00 QI:0|0|0|0.66|0|0.33|3|0|103)	NA	0	0.0598862	0.101316	0	0.0460319	0	1.30306	NA	NA	NA	NA	NA	NA	0	0
Dm_00015700-RA	NA	NA	not assigned.unknown	NA	no hits & (original description: transcript offset:0 AED:0.26 eAED:0.26 QI:0|-1|0|1|-1|1|1|0|59)	NA	0.15243	0.03296	0.454066	0.0432467	0.277394	0	1.29997	NA	NA	NA	NA	NA	NA	0	0
Dm_00020593-RA	NA	NA	not assigned.unknown	NA	no hits & (original description: transcript offset:0 AED:0.35 eAED:0.35 QI:0|0|0|0.33|1|1|3|0|118)	NA	0.57233	0.50627	0.874849	0.748961	0.799514	0.264419	1.29857	NA	NA	NA	NA	NA	NA	0	0
Dm_00001707-RA	KCS6	3-ketoacyl-CoA synthase 6	secondary metabolism.wax	AT1G68530	(at1g68530 : 529.0) Encodes KCS6, a member of the 3-ketoacyl-CoA synthase family involved in the biosynthesis of VLCFA (very long chain fatty acids).; 3-ketoacyl-CoA synthase 6 (KCS6); FUNCTIONS IN: transferase activity, transferring acyl groups other than amino-acyl groups, catalytic activity; INVOLVED IN: in 7 processes; LOCATED IN: endoplasmic reticulum; EXPRESSED IN: 29 plant structures; EXPR…	NA	0.340022	0.104355	0.14405	0.268117	0.278549	0.00834579	1.29733	3.65156	7.09412	3.16321	2.26833	NA	2.27805	0	0
Dm_00020911-RA	NA	NA	not assigned.unknown	NA	(loc_os09g05120.1 : 129.0) no description available & (reliability: 100.0) & (original description: transcript offset:0 AED:0.07 eAED:0.07 QI:0|-1|0|1|-1|1|1|0|288)	NA	0.139802	0.0672469	0.115838	0.120791	0.250568	0.0342467	1.29652	4.25038	5.37507	3.55162	2.38894	3.2246	3.35051	0	0
Dm_00007829-RA	NA	NA	not assigned.unknown	NA	no hits & (original description: transcript offset:0 AED:0.59 eAED:0.59 QI:0|-1|0|1|-1|1|1|0|67)	NA	0.645574	0.282125	0.371508	0.218572	0.505075	0	1.29617	NA	5.12312	NA	NA	NA	NA	0	0
Dm_00020273-RA	NA	NA	not assigned.unknown	NA	no hits & (original description: transcript offset:0 AED:0.44 eAED:0.44 QI:0|0|0|0.5|1|1|2|0|84)	NA	0	0.0781642	0.169148	0.101207	0.0465492	0	1.2888	NA	5.43316	NA	NA	5.43609	NA	0	0
Dm_00006032-RA	RLP7	receptor like protein 7	stress.biotic.PR-proteins, signalling.receptor kinases.leucine rich repeat X	AT1G47890	(at1g47890 : 117.0) receptor like protein 7 (RLP7); FUNCTIONS IN: kinase activity; INVOLVED IN: signal transduction, defense response; LOCATED IN: endomembrane system; EXPRESSED IN: stem, stamen; EXPRESSED DURING: 4 anthesis; CONTAINS InterPro DOMAIN/s: Leucine-rich repeat-containing N-terminal domain, type 2 (InterPro:IPR013210), Leucine-rich repeat (InterPro:IPR001611); BEST Arabidopsis thalian…	NA	0.133796	0.190684	0	0.341731	0.190183	0.0778457	1.28568	2.75191	4.04845	7.95356	2.76559	3.27661	1.88884	0	0
Dm_00016690-RA		hAT transposon superfamily protein	not assigned.unknown	AT4G08267	(loc_os11g39660.1 : 210.0) no description available & (at4g08267 : 86.3) hAT transposon superfamily protein; FUNCTIONS IN: molecular_function unknown; INVOLVED IN: biological_process unknown; LOCATED IN: cellular_component unknown; CONTAINS InterPro DOMAIN/s: Protein of unknown function DUF659 (InterPro:IPR007021); Has 115 Blast hits to 115 proteins in 7 species: Archae - 0; Bacteria - 0; Metazoa…	NA	0.0612323	0.16728	0.160483	0.209058	0.261387	0.0499172	1.26685	2.89708	4.71578	2.97946	2.29489	4.3345	2.68219	0	0
Dm_00009878-RA	NA	NA	not assigned.unknown	NA	no hits & (original description: transcript offset:0 AED:0.51 eAED:0.72 QI:0|-1|0|1|-1|1|1|0|127)	NA	0.368434	0.100268	0.0954911	0.154811	0.358328	0.181587	1.25023	3.63643	NA	3.90812	NA	NA	NA	0	0
Dm_00008074-RA	FRS5	FAR1-related sequence 5	signalling.light	AT4G38180	(at4g38180 : 341.0) FAR1-related sequence 5 (FRS5); FUNCTIONS IN: zinc ion binding; INVOLVED IN: response to red or far red light; LOCATED IN: cellular_component unknown; EXPRESSED IN: 22 plant structures; EXPRESSED DURING: 13 growth stages; CONTAINS InterPro DOMAIN/s: MULE transposase, conserved domain (InterPro:IPR018289), Transcription factor, FAR1-related (InterPro:IPR004330), Zinc finger, PM…	NA	0.0489734	0.626378	0.205866	0.0556676	0.215931	0.441071	1.24013	NA	NA	2.58375	2.55697	4.80557	4.5057	0	0
Dm_00009660-RA		hAT transposon superfamily protein	DNA.unspecified	AT1G43260	(loc_os12g35120.1 : 318.0) no description available & (at1g43260 : 309.0) hAT transposon superfamily protein; CONTAINS InterPro DOMAIN/s: Protein of unknown function DUF659 (InterPro:IPR007021); BEST Arabidopsis thaliana protein match is: hAT transposon superfamily protein (TAIR:AT5G31412.1); Has 599 Blast hits to 592 proteins in 25 species: Archae - 0; Bacteria - 0; Metazoa - 11; Fungi - 2; Plan…	NA	0.638061	0.194039	0.201928	0.167268	0.198806	0.370426	1.23524	2.66924	1.73647	2.62423	2.61303	NA	2.90322	0	0
Dm_00005434-RA		hAT dimerization domain-containing protein / transposase-like protein	DNA.synthesis/chromatin structure.retrotransposon/transposase.hat-like transposase	AT5G33406	(loc_os12g35120.1 : 302.0) no description available & (at5g33406 : 266.0) hAT dimerisation domain-containing protein / transposase-related; FUNCTIONS IN: protein dimerization activity; INVOLVED IN: biological_process unknown; LOCATED IN: mitochondrion; CONTAINS InterPro DOMAIN/s: HAT dimerisation (InterPro:IPR008906); BEST Arabidopsis thaliana protein match is: hAT transposon superfamily (TAIR:AT…	NA	0.232374	0.215552	0.395361	0.295501	0.444812	0.311136	1.22559	2.50544	1.95706	NA	NA	2.41419	2.01922	0	0
Dm_00005075-RA		hAT dimerization domain-containing protein / transposase-like protein	DNA.synthesis/chromatin structure.retrotransposon/transposase.hat-like transposase	AT5G33406	(at5g33406 : 185.0) hAT dimerisation domain-containing protein / transposase-related; FUNCTIONS IN: protein dimerization activity; INVOLVED IN: biological_process unknown; LOCATED IN: mitochondrion; CONTAINS InterPro DOMAIN/s: HAT dimerisation (InterPro:IPR008906); BEST Arabidopsis thaliana protein match is: hAT transposon superfamily (TAIR:AT4G15020.2); Has 707 Blast hits to 681 proteins in 26 s…	NA	0.0849508	0.213457	0.499144	0.344539	0.571786	0.129378	1.22143	2.48923	3.17633	NA	NA	3.68399	1.75335	0	0
Dm_00007123-RA	NA	NA	not assigned.unknown	NA	no hits & (original description: transcript offset:0 AED:0.86 eAED:0.86 QI:0|-1|0|1|-1|1|1|0|82)	NA	0	0.476448	0.0761373	0.208643	0.17273	0	1.21271	NA	5.32556	NA	NA	5.32848	NA	0	0
Dm_00012584-RA	NA	NA	not assigned.unknown	NA	no hits & (original description: transcript offset:0 AED:0.75 eAED:0.78 QI:0|0|0|0.5|0|0.5|2|0|106)	NA	0.150152	0.1814	0.323311	0.450749	0.397225	0.204044	1.20698	NA	NA	NA	NA	NA	NA	0	0
Dm_00016017-RA	DAYSLEEPER	BED zinc finger and hAT dimerization domain-containing protein DAYSLEEPER	DNA.unspecified	AT3G42170	(loc_os08g39520.1 : 126.0) no description available & (p08770|tra1_maize : 107.0) Putative AC transposase (ORFA) - Zea mays (Maize) & (at3g42170 : 89.0) transposase-like gene with conserved domains from the family of hAT transposases that includes hobo from Drosophila melanogaster, Activator (Ac) from maize, and Tam3 from snapdragon but lacks several amino acids known to be essential for Ac trans…	NA	0.362433	0.125426	0.166607	0.198869	0.117491	0.410528	1.1961	3.23041	NA	2.66894	3.28421	NA	2.63122	0	0
Dm_00004382-RA		DNA binding protein	RNA.regulation of transcription.putative transcription regulator	AT1G36095	(at1g36095 : 90.5) DNA binding; FUNCTIONS IN: DNA binding; INVOLVED IN: biological_process unknown; LOCATED IN: cellular_component unknown; CONTAINS InterPro DOMAIN/s: Zinc finger, BED-type predicted (InterPro:IPR003656), Protein of unknown function DUF659 (InterPro:IPR007021); BEST Arabidopsis thaliana protein match is: hAT transposon superfamily (TAIR:AT3G22220.2); Has 518 Blast hits to 485 pro…	NA	0.117412	0.0459345	0	0.0926617	0.115737	0.0490279	1.19429	4.68641	4.63489	7.32881	3.43307	3.38476	3.74781	0	0
Dm_00008621-RA	DAYSLEEPER	BED zinc finger and hAT dimerization domain-containing protein DAYSLEEPER	DNA.unspecified	AT3G42170	(loc_os07g34120.1 : 247.0) no description available & (p08770|tra1_maize : 144.0) Putative AC transposase (ORFA) - Zea mays (Maize) & (at3g42170 : 84.0) transposase-like gene with conserved domains from the family of hAT transposases that includes hobo from Drosophila melanogaster, Activator (Ac) from maize, and Tam3 from snapdragon but lacks several amino acids known to be essential for Ac trans…	NA	0.014446	0.0353673	0.0511545	0.428706	0.456831	0.285322	1.19334	5.06517	NA	5.02833	NA	6.2395	NA	0	0
Dm_00018989-RA		PIF1 helicase	DNA.unspecified	AT5G28780	(loc_os01g14770.1 : 281.0) no description available & (at5g28780 : 157.0) PIF1 helicase; CONTAINS InterPro DOMAIN/s: DNA helicase PIF1, ATP-dependent (InterPro:IPR010285); BEST Arabidopsis thaliana protein match is: PIF1 helicase (TAIR:AT3G51690.1); Has 1364 Blast hits to 1355 proteins in 303 species: Archae - 2; Bacteria - 367; Metazoa - 234; Fungi - 111; Plants - 389; Viruses - 9; Other Eukaryo…	NA	0.147701	0.0459064	0.129223	0.336766	0.213031	0.0774427	1.19253	4.6926	4.05675	3.26196	2.47628	2.96096	1.81947	0	0
Dm_00012127-RA	NA	NA	not assigned.unknown	NA	no hits & (original description: transcript offset:0 AED:0.44 eAED:0.48 QI:0|0|0|1|1|1|3|0|114)	NA	0.131871	0.19304	0.0606106	0.257304	0.313154	0.0827352	1.19004	NA	NA	NA	NA	NA	NA	0	0
Dm_00010377-RA	NA	NA	not assigned.unknown	NA	no hits & (original description: transcript offset:0 AED:0.71 eAED:0.81 QI:0|0|0|0.5|1|1|2|0|141)	NA	0.103202	0.0601239	0.0860097	0.104611	0.0809051	0	1.17892	4.25482	6.05729	3.94168	3.84036	3.60694	3.57078	0	0
Dm_00005556-RA		RNA helicase, ATP-dependent, SK12/DOB1 protein	DNA.unspecified	AT3G46960	(loc_os02g06500.1 : 102.0) no description available & (at3g46960 : 99.4) RNA helicase, ATP-dependent, SK12/DOB1 protein; FUNCTIONS IN: hydrolase activity, acting on acid anhydrides, in phosphorus-containing anhydrides, helicase activity, ATP-dependent helicase activity, ATP binding, nucleic acid binding; INVOLVED IN: biological_process unknown; LOCATED IN: vacuole; EXPRESSED IN: 25 plant structur…	NA	0.376117	0.302093	0.488413	0.34193	0.492109	0.0730075	1.17384	NA	3.92917	NA	NA	NA	NA	0	0
Dm_00009007-RA	NA	NA	not assigned.unknown	NA	(loc_os02g32670.1 : 151.0) no description available & (ipr010285 : 105.44891) DNA helicase PIF1, ATP-dependent & (reliability: 100.0) & (original description: transcript offset:0 AED:0.68 eAED:0.68 QI:0|0|0|0.33|0|0.33|3|0|296)	NA	0.0491606	0.199394	0.298505	0.123864	0.321533	0.122139	1.1681	2.54598	3.43598	1.92456	1.85068	4.69208	3.30567	0	0
Dm_00018057-RA		Biotin/lipoate A/B protein ligase family	Co-factor and vitamine metabolism	AT1G47578	(at1g47578 : 155.0) Biotin/lipoate A/B protein ligase family; FUNCTIONS IN: octanoyltransferase activity, catalytic activity; INVOLVED IN: protein modification process, lipoate biosynthetic process; LOCATED IN: cytoplasm; CONTAINS InterPro DOMAIN/s: Octanoyltransferase, conserved site (InterPro:IPR020605), Octanoyltransferase (InterPro:IPR000544), Biotin/lipoate A/B protein ligase (InterPro:IPR00…	NA	0.32707	0.309622	0.256487	0.226655	0.251992	0.329185	1.16542	1.89686	1.77065	2.17244	2.19657	1.78289	2.27913	0	0
Dm_00008852-RA	NA	NA	not assigned.unknown	NA	no hits & (original description: transcript offset:0 AED:0.73 eAED:0.73 QI:0|0|0|0.5|1|0.5|2|0|63)	NA	0.140332	0.164907	0.142709	0.231752	0.19939	0	1.16436	NA	NA	NA	NA	NA	NA	0	0
Dm_00012612-RA	NA	NA	not assigned.unknown	NA	no hits & (original description: transcript offset:0 AED:0.85 eAED:0.85 QI:0|0|0|0.16|0.8|0.83|6|0|236)	NA	0.263082	0.153667	0.215151	0.261027	0.29945	0.2198	1.16051	2.93871	2.36047	2.35087	1.95641	2.07046	2.13864	0	0
Dm_00011613-RA	NA	NA	not assigned.unknown	NA	(loc_os11g39940.1 : 94.4) no description available & (p03010|trac9_maize : 83.2) Putative AC9 transposase - Zea mays (Maize) & (reliability: 100.0) & (original description: transcript offset:0 AED:0.29 eAED:0.29 QI:0|0|0|0.66|1|1|3|0|191)	NA	0.210459	0.171879	0.279844	0.514455	0.374489	0.13106	1.15614	2.74453	3.05657	2.14393	NA	2.34505	NA	0	0
Dm_00012457-RA	NA	NA	not assigned.unknown	NA	no hits & (original description: transcript offset:0 AED:0.44 eAED:0.49 QI:0|-1|0|1|-1|1|1|0|165)	NA	0.101812	0.167698	0.334194	0.388517	0.364726	0	1.15006	2.77346	6.2747	NA	NA	3.45256	NA	0	0
Dm_00004361-RA	NA	NA	not assigned.unknown	NA	(loc_os02g55620.1 : 86.3) no description available & (reliability: 100.0) & (original description: transcript offset:41 AED:0.42 eAED:0.45 QI:41|0|0|1|0|0|4|0|173)	NA	0.290525	0.104141	0.0596326	0.309431	0.175709	0.0840255	1.13833	3.44334	3.61927	4.0218	2.71731	NA	NA	0	0
Dm_00008069-RA	AGL18	AGAMOUS-like 18	RNA.regulation of transcription.MADS box transcription factor family, development.unspecified	AT3G57390	(q9ate5|fbp24_pethy : 96.3) MADS-box protein FBP24 (Floral-binding protein 24) - Petunia hybrida (Petunia) & (at3g57390 : 93.6) encodes a MADS-box containing protein likely to be a transcription factor that is expressed in endosperm and developing gametophytes. The protein sequence is most similar to that of AGL15, which is expressed in developing embryos.; AGAMOUS-like 18 (AGL18); FUNCTIONS IN: …	NA	0	0.386742	0	0.228702	0.0316086	0.52931	1.13776	NA	NA	5.36672	NA	NA	NA	0	0
Dm_00006392-RA	NA	NA	not assigned.unknown	NA	(loc_os04g13790.1 : 114.0) no description available & (reliability: 100.0) & (original description: transcript offset:0 AED:0.46 eAED:0.46 QI:0|0|0|0.66|0|0.33|3|0|222)	NA	0.184712	0.0316881	0.00937426	0.0947881	0.231544	0.0950025	1.13378	5.22662	NA	5.99473	NA	NA	NA	0	0
Dm_00015316-RA	NA	NA	not assigned.unknown	NA	no hits & (original description: transcript offset:0 AED:0.36 eAED:0.36 QI:0|0|0|1|1|1|2|0|246)	NA	0.116675	0.168058	0.0943055	0.134444	0.310035	0.0479667	1.12698	2.73193	4.38274	3.52803	1.85954	3.1753	3.01118	0	0
Dm_00000327-RA	NA	NA	not assigned.unknown	NA	(loc_os10g30990.1 : 126.0) no description available & (reliability: 100.0) & (original description: transcript offset:0 AED:0.20 eAED:0.20 QI:0|-1|0|1|-1|1|1|0|119)	NA	0.0966023	0.129755	0.177463	0.35972	0.297307	0.0473183	1.11514	3.12327	4.79073	NA	NA	NA	NA	0	0
Dm_00009927-RA	NA	NA	not assigned.unknown	NA	no hits & (original description: transcript offset:0 AED:0.65 eAED:0.65 QI:0|0|0|0.5|1|1|2|0|64)	NA	0.0690697	0	0	0.113582	0.0430657	0	1.11297	NA	NA	NA	NA	NA	NA	0	0
Dm_00016681-RA	NA	NA	not assigned.unknown	NA	(p10978|polx_tobac : 96.7) Retrovirus-related Pol polyprotein from transposon TNT 1-94 [Includes: Protease (EC 3.4.23.-); Reverse transcriptase (EC 2.7.7.49); Endonuclease] - Nicotiana tabacum (Common tobacco) & (reliability: 100.0) & (original description: transcript offset:0 AED:0.39 eAED:0.42 QI:0|0|0|0.66|1|1|3|0|155)	NA	0.279055	0.178748	0.306878	0.261923	0.317147	0.0245222	1.11284	2.60353	5.14503	NA	NA	NA	NA	0	0
Dm_00013187-RA	NA	NA	not assigned.unknown	NA	(loc_os10g30680.1 : 135.0) no description available & (p03010|trac9_maize : 85.9) Putative AC9 transposase - Zea mays (Maize) & (reliability: 100.0) & (original description: transcript offset:0 AED:0.39 eAED:0.39 QI:0|0|0|1|0|0|3|0|143)	NA	0.0955851	0.298945	0.125744	0.410372	0.0551262	0.460286	1.10819	NA	NA	NA	4.19661	NA	NA	0	0
Dm_00018923-RA		hAT dimerization domain-containing protein / transposase-like protein	DNA.synthesis/chromatin structure.retrotransposon/transposase.hat-like transposase	AT5G33406	(at5g33406 : 168.0) hAT dimerisation domain-containing protein / transposase-related; FUNCTIONS IN: protein dimerization activity; INVOLVED IN: biological_process unknown; LOCATED IN: mitochondrion; CONTAINS InterPro DOMAIN/s: HAT dimerisation (InterPro:IPR008906); BEST Arabidopsis thaliana protein match is: hAT transposon superfamily (TAIR:AT4G15020.2); Has 707 Blast hits to 681 proteins in 26 s…	NA	0.0880963	0.105876	0.0588787	0.155162	0.169148	0.0513035	1.10772	3.38736	4.275	3.97139	2.72394	3.79403	2.77944	0	0
Dm_00016212-RA		PIF1 helicase	DNA.unspecified	AT5G28780	(loc_os10g11620.1 : 327.0) no description available & (ipr010285 : 286.27557) DNA helicase PIF1, ATP-dependent & (at5g28780 : 149.0) PIF1 helicase; CONTAINS InterPro DOMAIN/s: DNA helicase PIF1, ATP-dependent (InterPro:IPR010285); BEST Arabidopsis thaliana protein match is: PIF1 helicase (TAIR:AT3G51690.1); Has 1364 Blast hits to 1355 proteins in 303 species: Archae - 2; Bacteria - 367; Metazoa -…	NA	0.574174	0.200424	0.263517	0.300066	0.17223	0.058228	1.10754	2.46411	4.18809	2.05712	2.71434	NA	1.88628	0	0
Dm_00004383-RA		hAT dimerization domain-containing protein / transposase-like protein	DNA.synthesis/chromatin structure.retrotransposon/transposase.hat-like transposase	AT5G33406	(at5g33406 : 111.0) hAT dimerisation domain-containing protein / transposase-related; FUNCTIONS IN: protein dimerization activity; INVOLVED IN: biological_process unknown; LOCATED IN: mitochondrion; CONTAINS InterPro DOMAIN/s: HAT dimerisation (InterPro:IPR008906); BEST Arabidopsis thaliana protein match is: hAT transposon superfamily (TAIR:AT4G15020.2); Has 707 Blast hits to 681 proteins in 26 s…	NA	0.133893	0.0840665	0.0185811	0.120501	0.17855	0.111123	1.10071	NA	NA	5.33218	NA	NA	NA	0	0
Dm_00009838-RA		DNAse I-like superfamily protein	not assigned.unknown	AT1G43760	(at1g43760 : 190.0) DNAse I-like superfamily protein; CONTAINS InterPro DOMAIN/s: Endonuclease/exonuclease/phosphatase (InterPro:IPR005135), RNA-directed DNA polymerase (reverse transcriptase), related (InterPro:IPR015706); BEST Arabidopsis thaliana protein match is: DNAse I-like superfamily protein (TAIR:AT1G40390.1); Has 1816 Blast hits to 1744 proteins in 56 species: Archae - 0; Bacteria - 6; …	NA	0.273261	0.156471	0.0975422	0.134225	0.262638	0.0151734	1.09957	2.80582	5.97083	3.44896	2.08584	1.98108	3.14186	0	0
Dm_00010099-RA	NA	NA	not assigned.unknown	NA	(loc_os08g19870.1 : 149.0) no description available & (reliability: 100.0) & (original description: transcript offset:0 AED:0.42 eAED:0.42 QI:0|0|0|0.5|0|0|2|0|211)	NA	0.16956	0.19731	0.228589	0.321043	0.19349	0.0180139	1.09313	2.46649	5.57255	2.31495	2.56341	2.58312	NA	0	0
Dm_00010350-RA	NA	NA	not assigned.unknown	NA	no hits & (original description: transcript offset:0 AED:0.52 eAED:0.53 QI:0|0|0|0.5|1|0.5|2|0|113)	NA	0	0.100497	0.154599	0.0548476	0.119042	0.0339369	1.09077	NA	NA	NA	NA	5.62183	NA	0	0
Dm_00018949-RA	NA	NA	not assigned.unknown	NA	(loc_os08g25640.1 : 94.4) no description available & (reliability: 100.0) & (original description: transcript offset:0 AED:0.09 eAED:0.09 QI:0|-1|0|1|-1|1|1|0|161)	NA	0	0.160434	0.127029	0.28239	0.1859	0	1.08913	NA	6.12891	NA	NA	6.13184	NA	0	0
Dm_00009711-RA	MEF8	Tetratricopeptide repeat (TPR)-like superfamily protein	not assigned.no ontology.pentatricopeptide (PPR) repeat-containing protein	AT2G25580	(loc_os01g53610.1 : 309.0) no description available & (at2g25580 : 296.0) Tetratricopeptide repeat (TPR)-like superfamily protein; CONTAINS InterPro DOMAIN/s: Pentatricopeptide repeat (InterPro:IPR002885); BEST Arabidopsis thaliana protein match is: Pentatricopeptide repeat (PPR) superfamily protein (TAIR:AT4G32450.1); Has 21306 Blast hits to 10572 proteins in 176 species: Archae - 0; Bacteria - …	NA	0.255695	0.309246	0.262671	0.347999	0.199129	0.12666	1.06239	1.77573	3.08395	2.05291	2.43084	2.05396	1.69913	0	0
Dm_00011033-RA	NA	NA	not assigned.unknown	NA	no hits & (original description: transcript offset:0 AED:0.84 eAED:0.84 QI:0|0|0|0.33|0.5|0.66|3|0|278)	NA	0.325902	0.137418	0.117191	0.0712618	0.142481	0.0556104	1.06095	2.93673	4.42441	3.14516	2.98959	NA	3.72185	0	0
Dm_00009179-RA	NA	NA	not assigned.unknown	NA	no hits & (original description: transcript offset:0 AED:0.91 eAED:1.00 QI:0|0|0|0.33|1|1|3|0|88)	NA	0.0402	0.0262408	0.0829415	0.096607	0.0713724	0	1.06082	NA	NA	NA	NA	NA	NA	0	0
Dm_00005309-RA	NA	NA	not assigned.unknown	NA	no hits & (original description: transcript offset:0 AED:0.40 eAED:0.46 QI:0|0|0|0.66|1|1|3|0|266)	NA	0.0930716	0.139285	0.402809	0.547101	0.411506	0.0744311	1.05449	2.91464	3.68154	NA	NA	3.41727	NA	0	0
Dm_00020428-RA	NA	NA	not assigned.unknown	NA	no hits & (original description: transcript offset:0 AED:0.74 eAED:0.74 QI:0|0|0|0.33|1|1|3|0|87)	NA	0.236472	0.35109	0.403025	0.442393	0.114746	0.37204	1.05198	NA	NA	NA	NA	NA	NA	0	0
Dm_00013347-RA		Agenet and bromo-adjacent homology (BAH) domain-containing protein	RNA.regulation of transcription.putative transcription regulator	AT5G55600	(at5g55600 : 261.0) agenet domain-containing protein / bromo-adjacent homology (BAH) domain-containing protein; FUNCTIONS IN: RNA binding, DNA binding; INVOLVED IN: biological_process unknown; LOCATED IN: cellular_component unknown; EXPRESSED IN: 22 plant structures; EXPRESSED DURING: 13 growth stages; CONTAINS InterPro DOMAIN/s: Tudor-like, plant (InterPro:IPR014002), Agenet (InterPro:IPR008395)…	NA	0.025455	0.136779	0.116297	0.148575	0.0816527	0.0391978	1.0485	2.93726	4.6097	3.18476	3.83369	5.52681	2.77003	0	0
Dm_00006058-RA	NA	NA	not assigned.unknown	NA	no hits & (original description: transcript offset:0 AED:0.51 eAED:0.53 QI:0|0|0|0.5|0|0.5|2|0|91)	NA	0.0388748	0.0467758	0.0573381	0.200385	0	0	1.04831	NA	NA	NA	NA	NA	NA	0	0
Dm_00015346-RA		transmembrane protein	not assigned.unknown	AT5G53670	(loc_os10g30990.1 : 103.0) no description available & (at5g53670 : 81.3) unknown protein; FUNCTIONS IN: molecular_function unknown; INVOLVED IN: biological_process unknown; LOCATED IN: endomembrane system; EXPRESSED IN: sperm cell; Has 1807 Blast hits to 1807 proteins in 277 species: Archae - 0; Bacteria - 0; Metazoa - 736; Fungi - 347; Plants - 385; Viruses - 0; Other Eukaryotes - 339 (source: N…	NA	0.188018	0.223917	0.436039	0.58914	0.321189	0.119739	1.0322	2.1931	3.03273	NA	NA	NA	NA	0	0
Dm_00003720-RA	NA	NA	not assigned.unknown	NA	no hits & (original description: transcript offset:0 AED:0.82 eAED:0.82 QI:0|0|0|0.5|1|1|2|0|106)	NA	0.125107	0.0578543	0.065185	0.080202	0.107619	0.075461	1.02798	4.07805	NA	NA	NA	NA	NA	0	0
Dm_00005787-RA	NA	NA	not assigned.unknown	NA	no hits & (original description: transcript offset:0 AED:0.44 eAED:0.44 QI:0|0|0|0.33|0.6|0.5|6|0|264)	NA	0.10872	0.0620406	0.101231	0.0739058	0.149052	0.0888582	1.02703	4.10052	3.58222	3.41871	NA	NA	3.90236	0	0
Dm_00004362-RA	DAYSLEEPER	BED zinc finger and hAT dimerization domain-containing protein DAYSLEEPER	DNA.unspecified	AT3G42170	(loc_os03g52310.1 : 110.0) no description available & (at3g42170 : 93.6) transposase-like gene with conserved domains from the family of hAT transposases that includes hobo from Drosophila melanogaster, Activator (Ac) from maize, and Tam3 from snapdragon but lacks several amino acids known to be essential for Ac transposition5. The DAYSLEEPER gene lacks 8 bp duplications and TIRs (a common featur…	NA	0.100698	0.106655	0.0872883	0.255564	0.477913	0.259626	1.01783	3.26151	NA	3.43376	NA	NA	NA	0	0
Dm_00010744-RA	NA	NA	not assigned.unknown	NA	(loc_os12g21970.1 : 92.0) no description available & (reliability: 100.0) & (original description: transcript offset:0 AED:0.39 eAED:0.39 QI:0|-1|0|1|-1|1|1|0|197)	NA	0.195054	0.115359	0.168189	0.223771	0.261566	0.0857494	1.00956	3.09245	3.81808	NA	NA	NA	NA	0	0
Dm_00005638-RA	GRP7	cold, circadian rhythm, and rna binding 2	RNA.RNA binding	AT2G21660	(loc_os12g43600.2 : 84.0) no description available & (p10979|grpa_maize : 83.6) Glycine-rich RNA-binding, abscisic acid-inducible protein - Zea mays (Maize) & (at2g21660 : 80.5) Encodes a small glycine-rich RNA binding protein that is part of a negative-feedback loop through which AtGRP7 regulates the circadian oscillations of its own transcript. Gene expression is induced by cold. GRP7 appears t…	NA	0.126738	0.110991	0.103677	0.153915	0.211764	0.0159968	1.00244	3.17442	6.19487	3.32274	NA	2.98521	2.70542	0	0
Dm_00015668-RA		hAT dimerization domain-containing protein / transposase-like protein	DNA.synthesis/chromatin structure.retrotransposon/transposase.hat-like transposase	AT5G33406	(at5g33406 : 220.0) hAT dimerisation domain-containing protein / transposase-related; FUNCTIONS IN: protein dimerization activity; INVOLVED IN: biological_process unknown; LOCATED IN: mitochondrion; CONTAINS InterPro DOMAIN/s: HAT dimerisation (InterPro:IPR008906); BEST Arabidopsis thaliana protein match is: hAT transposon superfamily (TAIR:AT4G15020.2); Has 707 Blast hits to 681 proteins in 26 s…	NA	0.177996	0.529068	0.15416	0.147458	0.231617	0	0.993762	NA	6.85741	2.68907	2.14914	2.45197	2.8939	0	0
Dm_00008945-RA	NA	NA	not assigned.unknown	NA	no hits & (original description: transcript offset:0 AED:0.42 eAED:0.42 QI:0|-1|0|1|-1|1|1|0|62)	NA	0	0.256609	0.229169	0.0586228	0.639879	0	0.992466	NA	NA	NA	NA	NA	NA	0	0
Dm_00010006-RA	NA	NA	not assigned.unknown	NA	no hits & (original description: transcript offset:0 AED:0.62 eAED:0.62 QI:0|0|0|0.16|1|1|6|0|269)	NA	0.217894	0.454623	0.08243	0.222897	0.269224	0.210951	0.981383	NA	NA	3.81568	NA	NA	NA	0	0
Dm_00003018-RA	NA	NA	not assigned.unknown	NA	no hits & (original description: transcript offset:0 AED:0.48 eAED:0.54 QI:0|0|0|0.33|1|1|3|0|279)	NA	0	0.0356843	0.737843	0.245759	0.638383	0.0488521	0.981118	4.65747	4.35305	NA	NA	6.78161	2.04096	0	0
Dm_00006031-RA	NA	NA	not assigned.unknown	NA	no hits & (original description: transcript offset:0 AED:0.51 eAED:0.51 QI:0|-1|0|1|-1|1|1|0|196)	NA	0.337984	0.177248	0.0106178	0.369678	0.170686	0.021418	0.979828	NA	5.29846	5.58535	NA	NA	NA	0	0
Dm_00009011-RA		PIF1 helicase	DNA.unspecified	AT5G28780	(loc_os11g44830.1 : 568.0) no description available & (ipr010285 : 257.24768) DNA helicase PIF1, ATP-dependent & (at5g28780 : 136.0) PIF1 helicase; CONTAINS InterPro DOMAIN/s: DNA helicase PIF1, ATP-dependent (InterPro:IPR010285); BEST Arabidopsis thaliana protein match is: PIF1 helicase (TAIR:AT3G51690.1); Has 1364 Blast hits to 1355 proteins in 303 species: Archae - 2; Bacteria - 367; Metazoa -…	NA	0.197317	0.481663	0.472283	0.14644	0.333282	0.235519	0.96271	NA	2.03351	NA	1.54637	2.29532	2.69616	0	0
Dm_00003959-RA	CYP76C4	cytochrome P450, family 76, subfamily C, polypeptide 4	misc.cytochrome P450	AT2G45550	(at2g45550 : 380.0) member of CYP76C; cytochrome P450, family 76, subfamily C, polypeptide 4 (CYP76C4); FUNCTIONS IN: electron carrier activity, monooxygenase activity, iron ion binding, oxygen binding, heme binding; INVOLVED IN: oxidation reduction; EXPRESSED IN: stem, root, carpel; EXPRESSED DURING: 4 anthesis; CONTAINS InterPro DOMAIN/s: Cytochrome P450 (InterPro:IPR001128), Cytochrome P450, E…	NA	0.1392	0.138217	0.0257899	0.141865	0.249944	0.0480284	0.962475	NA	4.42121	4.99874	NA	NA	NA	0	0
Dm_00010250-RA		helicase domain-containing protein / IBR domain-containing protein / zinc finger protein-like protein	DNA.synthesis/chromatin structure, protein.degradation.ubiquitin.E3.RING	AT5G10370	(at5g10370 : 1409.0) helicase domain-containing protein / IBR domain-containing protein / zinc finger protein-related; FUNCTIONS IN: helicase activity, zinc ion binding, ATP-dependent helicase activity, nucleic acid binding, ATP binding; LOCATED IN: intracellular, chloroplast; CONTAINS InterPro DOMAIN/s: Helicase-associated domain (InterPro:IPR007502), DNA/RNA helicase, DEAD/DEAH box type, N-term…	NA	0.557515	0.748129	0.477515	0.373771	0.502255	0.287023	0.962002	NA	1.71577	1.0352	0.929153	0.788311	1.35746	0	0
Dm_00009830-RA	NA	NA	not assigned.unknown	NA	no hits & (original description: transcript offset:19 AED:0.50 eAED:0.55 QI:19|0|0|1|0|0|3|0|117)	NA	0.0755985	0.0191683	0.0340232	0.131006	0.0513415	0	0.958874	5.62863	5.55125	NA	NA	NA	NA	0	0
Dm_00012294-RA		hAT transposon superfamily protein	RNA.regulation of transcription.putative transcription regulator, DNA.unspecified	AT1G43260	(loc_os05g14320.1 : 126.0) no description available & (at1g43260 : 99.4) hAT transposon superfamily protein; CONTAINS InterPro DOMAIN/s: Protein of unknown function DUF659 (InterPro:IPR007021); BEST Arabidopsis thaliana protein match is: hAT transposon superfamily protein (TAIR:AT5G31412.1); Has 599 Blast hits to 592 proteins in 25 species: Archae - 0; Bacteria - 0; Metazoa - 11; Fungi - 2; Plant…	NA	0.167905	0.0858534	0.109779	0.100484	0.111952	0.0240565	0.95719	NA	NA	NA	NA	NA	NA	0	0
Dm_00006207-RA	NA	NA	not assigned.unknown	NA	(loc_os11g39940.1 : 171.0) no description available & (p03010|trac9_maize : 124.0) Putative AC9 transposase - Zea mays (Maize) & (reliability: 100.0) & (original description: transcript offset:0 AED:0.15 eAED:0.17 QI:0|-1|0|1|-1|1|1|0|262)	NA	0.0555402	0.1834	0.308013	0.406681	0.711844	0.197149	0.955088	2.40616	NA	NA	NA	4.24429	NA	0	0
Dm_00000620-RA	NA	NA	not assigned.unknown	NA	no hits & (original description: transcript offset:0 AED:0.30 eAED:0.50 QI:0|0|0|1|0|0|2|0|70)	NA	0.321566	0.424639	0.0689789	0.615177	0	0.179911	0.953655	NA	NA	NA	5.39542	NA	NA	0	0
Dm_00008348-RA	DAYSLEEPER	BED zinc finger and hAT dimerization domain-containing protein DAYSLEEPER	DNA.unspecified	AT3G42170	(loc_os07g34120.1 : 326.0) no description available & (p08770|tra1_maize : 185.0) Putative AC transposase (ORFA) - Zea mays (Maize) & (at3g42170 : 157.0) transposase-like gene with conserved domains from the family of hAT transposases that includes hobo from Drosophila melanogaster, Activator (Ac) from maize, and Tam3 from snapdragon but lacks several amino acids known to be essential for Ac tran…	NA	0.233998	0.230897	0.34449	0.500216	0.410576	0.381691	0.952225	2.04878	NA	NA	NA	1.98712	NA	0	0
Dm_00001054-RA	NA	NA	not assigned.unknown	NA	no hits & (original description: transcript offset:0 AED:0.62 eAED:0.62 QI:0|0|0|0.5|0|0.5|2|0|172)	NA	0.803057	0.141786	0.293956	0	0.134888	0.174561	0.951176	2.78374	NA	NA	2.84272	NA	6.40733	0	0
Dm_00009350-RA	NA	NA	not assigned.unknown	NA	(loc_os01g33990.1 : 140.0) no description available & (reliability: 100.0) & (original description: transcript offset:0 AED:0.16 eAED:0.16 QI:0|0|0|1|1|1|2|0|215)	NA	0.225874	0.225508	0.17761	0.291244	0.398843	0.115774	0.950517	2.05165	3.18087	2.43842	NA	NA	NA	0	0
Dm_00016866-RA	DAYSLEEPER	BED zinc finger and hAT dimerization domain-containing protein DAYSLEEPER	DNA.unspecified	AT3G42170	(loc_os10g08970.1 : 163.0) no description available & (p03010|trac9_maize : 82.8) Putative AC9 transposase - Zea mays (Maize) & (at3g42170 : 81.6) transposase-like gene with conserved domains from the family of hAT transposases that includes hobo from Drosophila melanogaster, Activator (Ac) from maize, and Tam3 from snapdragon but lacks several amino acids known to be essential for Ac transpositi…	NA	0.0237942	0.0177358	0.108111	0.0917477	0.190389	0.023462	0.945549	5.69533	5.54125	3.17598	NA	5.54418	3.41575	0	0
Dm_00007787-RA	DAYSLEEPER	BED zinc finger and hAT dimerization domain-containing protein DAYSLEEPER	DNA.unspecified	AT3G42170	(loc_os10g08970.1 : 460.0) no description available & (p08770|tra1_maize : 304.0) Putative AC transposase (ORFA) - Zea mays (Maize) & (at3g42170 : 214.0) transposase-like gene with conserved domains from the family of hAT transposases that includes hobo from Drosophila melanogaster, Activator (Ac) from maize, and Tam3 from snapdragon but lacks several amino acids known to be essential for Ac tran…	NA	0.115171	0.0591783	0.0630947	0.118029	0.170054	0.0458388	0.922884	3.96002	4.22119	3.80246	2.44946	2.96754	2.94175	0	0
Dm_00006232-RA		hAT dimerization domain-containing protein / transposase-like protein	DNA.synthesis/chromatin structure.retrotransposon/transposase.hat-like transposase	AT5G33406	(at5g33406 : 111.0) hAT dimerisation domain-containing protein / transposase-related; FUNCTIONS IN: protein dimerization activity; INVOLVED IN: biological_process unknown; LOCATED IN: mitochondrion; CONTAINS InterPro DOMAIN/s: HAT dimerisation (InterPro:IPR008906); BEST Arabidopsis thaliana protein match is: hAT transposon superfamily (TAIR:AT4G15020.2); Has 707 Blast hits to 681 proteins in 26 s…	NA	0.0863372	0.0404431	0.0783691	0.0762154	0.0858753	0	0.916673	4.46239	6.57019	3.40842	3.48448	3.40348	3.70156	0	0
Dm_00013967-RA	NA	NA	not assigned.unknown	NA	no hits & (original description: transcript offset:0 AED:0.61 eAED:0.61 QI:0|-1|0|1|-1|1|1|0|123)	NA	0.028761	0.524145	0.326219	0.435453	0.383496	0	0.909744	NA	5.51381	NA	NA	NA	NA	0	0
Dm_00001412-RA	NA	NA	not assigned.unknown	NA	no hits & (original description: transcript offset:0 AED:0.41 eAED:0.68 QI:0|0|0|1|0|0|2|0|67)	NA	0.243633	0.155062	0.50201	0.440961	0.205646	0	0.909401	NA	NA	NA	NA	NA	NA	0	0
Dm_00019974-RA		PIF1 helicase	DNA.unspecified	AT5G28780	(loc_os07g09300.1 : 152.0) no description available & (at5g28780 : 119.0) PIF1 helicase; CONTAINS InterPro DOMAIN/s: DNA helicase PIF1, ATP-dependent (InterPro:IPR010285); BEST Arabidopsis thaliana protein match is: PIF1 helicase (TAIR:AT3G51690.1); Has 1364 Blast hits to 1355 proteins in 303 species: Archae - 2; Bacteria - 367; Metazoa - 234; Fungi - 111; Plants - 389; Viruses - 9; Other Eukaryo…	NA	0.0237659	0.702301	0.456848	0.620503	0.516493	0.123987	0.90711	NA	2.94817	NA	NA	5.15586	NA	0	0
Dm_00013821-RA	NA	NA	not assigned.unknown	NA	no hits & (original description: transcript offset:0 AED:0.64 eAED:0.64 QI:0|0|0|0.5|1|1|2|0|198)	NA	0.051167	0.0311529	0.0105105	0.0253365	0.103256	0	0.905222	4.82002	6.18127	5.51709	NA	NA	NA	0	0
Dm_00015795-RA		Dihydropterin pyrophosphokinase / Dihydropteroate synthase	C1-metabolism.dihydropteridine diphosphokinase	AT4G30000	(at4g30000 : 576.0) Dihydropterin pyrophosphokinase / Dihydropteroate synthase; FUNCTIONS IN: 2-amino-4-hydroxy-6-hydroxymethyldihydropteridine diphosphokinase activity, dihydropteroate synthase activity; INVOLVED IN: pteridine and derivative metabolic process, cellular metabolic process, folic acid and derivative biosynthetic process; EXPRESSED IN: 21 plant structures; EXPRESSED DURING: 13 growt…	NA	0.651421	0.488575	0.534577	0.597574	0.378568	0.540549	0.901143	NA	NA	NA	1.23749	NA	NA	0	0
Dm_00011034-RA	NA	NA	not assigned.unknown	NA	(loc_os01g41210.1 : 103.0) no description available & (reliability: 100.0) & (original description: transcript offset:0 AED:0.18 eAED:0.35 QI:0|0|0|1|0.33|0.25|4|0|291)	NA	0.139515	0.0516951	0.0451989	0.0642078	0.109467	0.0391849	0.896454	4.11405	4.34977	4.05463	3.03746	NA	3.58511	0	0
Dm_00008851-RA	NA	NA	not assigned.unknown	NA	no hits & (original description: transcript offset:0 AED:0.84 eAED:0.84 QI:0|0|0|0.5|1|1|2|0|128)	NA	0.079149	0.0662303	0.127262	0.0479916	0.11967	0.0624912	0.895039	3.72767	NA	NA	NA	NA	NA	0	0
Dm_00014843-RA	NA	NA	not assigned.unknown	NA	no hits & (original description: transcript offset:0 AED:0.45 eAED:0.68 QI:0|0|0|0.66|1|1|3|0|186)	NA	0.0497216	0.373363	0.389554	0.281906	0.25394	0	0.894575	NA	6.07473	NA	NA	4.24354	NA	0	0
Dm_00015262-RA	NA	NA	not assigned.unknown	NA	no hits & (original description: transcript offset:0 AED:0.62 eAED:0.62 QI:0|0|0|0.25|1|1|8|0|506)	NA	0.0497319	0.334522	0.602018	0.369269	0.577306	0.0546571	0.891743	1.42868	4.09514	NA	NA	4.12173	NA	0	0
Dm_00020980-RA	NA	NA	not assigned.unknown	NA	(loc_os08g22910.1 : 100.0) no description available & (reliability: 100.0) & (original description: transcript offset:0 AED:0.28 eAED:0.28 QI:0|-1|0|1|-1|1|1|0|163)	NA	0.0434062	0	0.0616337	0.166515	0.103419	0	0.888966	6.90307	5.86392	NA	NA	NA	NA	0	0
Dm_00008792-RA	NA	NA	not assigned.unknown	NA	(loc_os03g31560.1 : 128.0) no description available & (reliability: 100.0) & (original description: transcript offset:0 AED:0.86 eAED:0.88 QI:0|0|0|0.25|1|1|4|0|221)	NA	0.0916839	0.099254	0.0737083	0.223327	0.122674	0.0426779	0.886887	3.15278	4.44608	3.52518	2.87852	3.41656	NA	0	0
Dm_00005435-RA	DAYSLEEPER	BED zinc finger and hAT dimerization domain-containing protein DAYSLEEPER	DNA.unspecified	AT3G42170	(loc_os01g18650.1 : 236.0) no description available & (at3g42170 : 206.0) transposase-like gene with conserved domains from the family of hAT transposases that includes hobo from Drosophila melanogaster, Activator (Ac) from maize, and Tam3 from snapdragon but lacks several amino acids known to be essential for Ac transposition5. The DAYSLEEPER gene lacks 8 bp duplications and TIRs (a common featu…	NA	0.182963	0.0995604	0.104962	0.201196	0.216153	0.109114	0.8862	3.16336	2.98502	3.19306	2.05089	2.27105	2.17473	0	0
Dm_00012126-RA		hAT transposon superfamily protein	RNA.regulation of transcription.putative transcription regulator, DNA.unspecified	AT1G43260	(loc_os01g28200.1 : 134.0) no description available & (at1g43260 : 112.0) hAT transposon superfamily protein; CONTAINS InterPro DOMAIN/s: Protein of unknown function DUF659 (InterPro:IPR007021); BEST Arabidopsis thaliana protein match is: hAT transposon superfamily protein (TAIR:AT5G31412.1); Has 599 Blast hits to 592 proteins in 25 species: Archae - 0; Bacteria - 0; Metazoa - 11; Fungi - 2; Plan…	NA	0.172502	0.0773992	0.231031	0.292557	0.408732	0.032636	0.886067	3.53391	4.83837	NA	NA	NA	NA	0	0
Dm_00005214-RA	NA	NA	not assigned.unknown	NA	no hits & (original description: transcript offset:0 AED:0.35 eAED:0.55 QI:0|0|0|1|0|0|3|0|185)	NA	0.0238944	0.0586926	0.0825084	0.0724981	0.131972	0	0.885261	NA	NA	NA	NA	NA	NA	0	0
Dm_00019979-RA	NA	NA	not assigned.unknown	NA	(loc_os12g05520.1 : 147.0) no description available & (reliability: 100.0) & (original description: transcript offset:0 AED:0.28 eAED:0.28 QI:0|0|0|0.33|1|1|3|0|400)	NA	0.581834	0.0879348	0	0.218018	0.0855571	0.233593	0.869655	3.31411	NA	7.39623	3.339	NA	NA	0	0
Dm_00011261-RA	NA	NA	not assigned.unknown	NA	(loc_os08g25640.1 : 139.0) no description available & (reliability: 100.0) & (original description: transcript offset:0 AED:0.34 eAED:0.34 QI:0|0|0|0.5|1|1|2|0|489)	NA	0.0540992	0.0918515	0.111173	0.183124	0.125427	0.0155457	0.869556	3.25712	5.59091	3.00458	2.79286	4.00268	2.21093	0	0
Dm_00013633-RA	GTR2	Major facilitator superfamily protein	transport.peptides and oligopeptides	AT5G62680	(loc_os03g48180.1 : 89.0) no description available & (at5g62680 : 83.2) Major facilitator superfamily protein; FUNCTIONS IN: transporter activity; INVOLVED IN: oligopeptide transport, response to karrikin; LOCATED IN: plasma membrane, membrane; EXPRESSED IN: 23 plant structures; EXPRESSED DURING: 13 growth stages; CONTAINS InterPro DOMAIN/s: Oligopeptide transporter (InterPro:IPR000109), Major fa…	Plant permeome.carrier-mediated transport.MFS superfamily.NRT1/PTR family..	0.0597799	0.183785	0.106188	0.240942	0.0386932	0.335254	0.866335	2.22692	NA	2.93026	4.31961	4.05955	NA	0	0
Dm_00007198-RA	NA	NA	not assigned.unknown	NA	(loc_os11g44830.1 : 291.0) no description available & (ipr010285 : 145.86137) DNA helicase PIF1, ATP-dependent & (reliability: 100.0) & (original description: transcript offset:0 AED:0.36 eAED:0.36 QI:0|0|0|0.75|0.33|0.5|4|0|397)	NA	0.0289563	0.179921	0.100166	0.28247	0.25105	0.044906	0.861198	2.25532	4.2682	3.14509	NA	4.72204	NA	0	0
Dm_00020339-RA	NA	NA	not assigned.unknown	NA	(loc_os03g41840.1 : 129.0) no description available & (reliability: 100.0) & (original description: transcript offset:0 AED:0.12 eAED:0.13 QI:0|0|0|1|1|1|2|0|224)	NA	0.0157929	0.0417141	0	0.0491506	0.0297604	0.0590747	0.860457	4.42443	NA	6.53967	5.00631	5.32178	4.19604	0	0
Dm_00012990-RA	DAYSLEEPER	BED zinc finger and hAT dimerization domain-containing protein DAYSLEEPER	DNA.unspecified	AT3G42170	(loc_os07g47800.1 : 114.0) no description available & (p03010|trac9_maize : 98.6) Putative AC9 transposase - Zea mays (Maize) & (at3g42170 : 89.4) transposase-like gene with conserved domains from the family of hAT transposases that includes hobo from Drosophila melanogaster, Activator (Ac) from maize, and Tam3 from snapdragon but lacks several amino acids known to be essential for Ac transpositi…	NA	0.031249	0.116861	0.110056	0.111001	0.236308	0.0442215	0.859317	2.85144	4.58033	2.97526	NA	4.64188	2.98217	0	0
Dm_00010848-RA	DAYSLEEPER	BED zinc finger and hAT dimerization domain-containing protein DAYSLEEPER	DNA.unspecified	AT3G42170	(loc_os11g39940.1 : 188.0) no description available & (p03010|trac9_maize : 128.0) Putative AC9 transposase - Zea mays (Maize) & (at3g42170 : 87.8) transposase-like gene with conserved domains from the family of hAT transposases that includes hobo from Drosophila melanogaster, Activator (Ac) from maize, and Tam3 from snapdragon but lacks several amino acids known to be essential for Ac transposit…	NA	0.104686	0.21758	0.536079	0.484287	0.378947	0.0587652	0.857557	1.99256	3.96299	NA	NA	2.85338	NA	0	0
Dm_00010617-RA	NA	NA	not assigned.unknown	NA	(loc_os11g41190.1 : 103.0) no description available & (reliability: 100.0) & (original description: transcript offset:0 AED:0.94 eAED:0.94 QI:0|0|0|0.2|0.5|0.2|5|0|262)	NA	0.050616	0.225406	0.213009	0.360765	0.261483	0.0970593	0.850671	1.90381	3.06185	2.12453	NA	4.05876	NA	0	0
Dm_00012598-RA	NA	NA	not assigned.unknown	NA	no hits & (original description: transcript offset:0 AED:0.33 eAED:0.33 QI:0|0|0|0.28|1|1|7|0|357)	NA	0.066666	0.0130367	0.00582937	0	0.0143609	0	0.850113	6.08365	6.94413	6.28539	5.77708	NA	7.28343	0	0
Dm_00015790-RA		hAT dimerization domain-containing protein / transposase-like protein	DNA.synthesis/chromatin structure.retrotransposon/transposase.hat-like transposase	AT5G33406	(at5g33406 : 184.0) hAT dimerisation domain-containing protein / transposase-related; FUNCTIONS IN: protein dimerization activity; INVOLVED IN: biological_process unknown; LOCATED IN: mitochondrion; CONTAINS InterPro DOMAIN/s: HAT dimerisation (InterPro:IPR008906); BEST Arabidopsis thaliana protein match is: hAT transposon superfamily (TAIR:AT4G15020.2); Has 707 Blast hits to 681 proteins in 26 s…	NA	0.116103	0.121612	0.117456	0.12787	0.245981	0.0319104	0.826113	2.75991	4.55492	2.66636	NA	2.92858	2.62769	0	0
Dm_00009211-RA	NA	NA	not assigned.unknown	NA	(loc_os09g05120.1 : 127.0) no description available & (reliability: 100.0) & (original description: transcript offset:0 AED:0.11 eAED:0.11 QI:0|-1|0|1|-1|1|1|0|316)	NA	0.0951278	0.090645	0.0165119	0.0844129	0.121695	0.0360848	0.824034	NA	NA	5.97756	NA	NA	NA	0	0
Dm_00007957-RA	TBL2	trichome birefringence-like protein (DUF828)	not assigned.unknown	AT1G60790	(at1g60790 : 105.0) Encodes a member of the TBL (TRICHOME BIREFRINGENCE-LIKE) gene family containing a plant-specific DUF231 (domain of unknown function) domain. TBL gene family has 46 members, two of which (TBR/AT5G06700 and TBL3/AT5G01360) have been shown to be involved in the synthesis and deposition of secondary wall cellulose, presumably by influencing the esterification state of pectic poly…	NA	0.0188105	0.398833	0.00885568	0	0.122184	0	0.819978	NA	6.29665	5.6203	NA	5.33778	6.63595	0	0
Dm_00006264-RA	NA	NA	not assigned.unknown	NA	no hits & (original description: transcript offset:0 AED:0.66 eAED:0.66 QI:0|0|0|0.25|0.66|0.75|4|0|178)	NA	0.162158	0.265367	0.311537	0.528248	0.517777	0.130291	0.804223	NA	NA	NA	NA	NA	NA	0	0
Dm_00007758-RA	NA	NA	not assigned.unknown	NA	(loc_os09g06280.1 : 87.0) no description available & (reliability: 100.0) & (original description: transcript offset:0 AED:0.38 eAED:0.38 QI:0|0|0|0.5|1|1|2|0|113)	NA	0.0391191	0.0207515	0.0184167	0.0987571	0.201373	0.0336366	0.800989	NA	NA	NA	NA	NA	NA	0	0
Dm_00015349-RA	NA	NA	not assigned.unknown	NA	(loc_os12g35940.1 : 176.0) no description available & (reliability: 100.0) & (original description: transcript offset:0 AED:0.02 eAED:0.02 QI:0|0|0|1|0.5|0.66|3|0|320)	NA	0.058034	0.141142	0.14083	0.107204	0.238144	0.0413523	0.800524	2.50827	4.28423	2.37783	NA	3.61068	2.9116	0	0
Dm_00015216-RA	NA	NA	not assigned.unknown	NA	no hits & (original description: transcript offset:0 AED:0.47 eAED:0.76 QI:0|0|0|1|0|0|2|0|67)	NA	0	0.189528	0	0	0	0	0.791814	NA	NA	NA	NA	NA	NA	0	0
Dm_00003341-RA	NA	NA	not assigned.unknown	NA	no hits & (original description: transcript offset:0 AED:0.18 eAED:0.18 QI:0|0|0|0.5|1|1|2|0|132)	NA	0.127265	0.0500115	0	0.0465373	0.0922632	0.0287949	0.791738	NA	NA	NA	NA	NA	NA	0	0
Dm_00015091-RA		serine/threonine-protein phosphatase 7 long form-like protein	protein.postranslational modification	AT1G48120	(at1g48120 : 240.0) hydrolases;protein serine/threonine phosphatases; FUNCTIONS IN: hydrolase activity, protein serine/threonine phosphatase activity; INVOLVED IN: biological_process unknown; LOCATED IN: cellular_component unknown; EXPRESSED IN: 21 plant structures; EXPRESSED DURING: 12 growth stages; CONTAINS InterPro DOMAIN/s: Metallophosphoesterase (InterPro:IPR004843), Aminotransferase-like, …	NA	0.121	0.317452	0.2394	0.264939	0.421461	0.0395958	0.785025	NA	4.13775	NA	NA	2.67244	NA	0	0
Dm_00007755-RA	NA	NA	not assigned.unknown	NA	no hits & (original description: transcript offset:0 AED:0.40 eAED:0.40 QI:0|0|0|0.5|1|1|2|0|73)	NA	0	0.122554	0.0946522	0.0343604	0.0377562	0.0575059	0.784139	NA	NA	NA	NA	NA	NA	0	0
Dm_00017449-RA	NA	NA	not assigned.unknown	NA	no hits & (original description: transcript offset:0 AED:0.44 eAED:0.44 QI:0|-1|0|1|-1|1|1|0|100)	NA	0	0	0	0.490555	0.432598	0.121968	0.783746	6.05905	NA	NA	NA	NA	NA	0	0
Dm_00010560-RA	NA	NA	not assigned.unknown	NA	no hits & (original description: transcript offset:0 AED:0.14 eAED:0.14 QI:0|0|0|1|1|1|2|0|148)	NA	0.187967	0.0602076	0.0652503	0.0498318	0.183182	0	0.781881	NA	NA	NA	NA	NA	NA	0	0
Dm_00012648-RA	NA	NA	not assigned.unknown	NA	no hits & (original description: transcript offset:0 AED:0.74 eAED:0.77 QI:0|0|0|0.33|1|1|3|0|113)	NA	0.190728	0.0373529	0	0.0765596	0.0487823	0.0707864	0.775942	NA	NA	5.4132	NA	NA	NA	0	0
Dm_00013819-RA	NA	NA	not assigned.unknown	NA	(loc_os01g33990.1 : 81.3) no description available & (reliability: 100.0) & (original description: transcript offset:0 AED:0.49 eAED:0.49 QI:0|0|0|0.75|0|0|4|0|186)	NA	0.116273	0.0250221	0.0392411	0.0396511	0.0506588	0.0225695	0.775417	5.02263	4.89167	4.3748	4.01406	NA	4.37872	0	0
Dm_00012620-RA	NA	NA	not assigned.unknown	NA	no hits & (original description: transcript offset:0 AED:0.49 eAED:0.51 QI:0|0|0|0.5|1|0.5|2|0|80)	NA	0.04422	0.140249	0.624053	0.0313539	0.515934	0.529027	0.772512	NA	NA	NA	NA	NA	NA	0	0
Dm_00012876-RA	NA	NA	not assigned.unknown	NA	no hits & (original description: transcript offset:0 AED:0.81 eAED:0.81 QI:0|0|0|0.33|1|1|3|0|116)	NA	0.479586	0.10635	0.304539	0.201737	0.17957	0.319727	0.769434	NA	NA	NA	NA	NA	NA	0	0
Dm_00013102-RA		TTF-type zinc finger protein with HAT dimerization domain-containing protein	not assigned.no ontology	AT1G19260	(loc_os12g34390.1 : 85.5) no description available & (at1g19260 : 80.1) TTF-type zinc finger protein with HAT dimerisation domain; FUNCTIONS IN: protein dimerization activity; INVOLVED IN: biological_process unknown; LOCATED IN: cellular_component unknown; CONTAINS InterPro DOMAIN/s: HAT dimerisation (InterPro:IPR008906), Zinc finger, TTF-type (InterPro:IPR006580); BEST Arabidopsis thaliana prote…	NA	0.120126	0.0479949	0.00630632	0.100996	0.0916748	0.0516172	0.76502	4.0232	3.85918	6.00322	NA	NA	NA	0	0
Dm_00006329-RA	NA	NA	not assigned.unknown	NA	(loc_os06g32850.1 : 104.0) no description available & (p10978|polx_tobac : 102.0) Retrovirus-related Pol polyprotein from transposon TNT 1-94 [Includes: Protease (EC 3.4.23.-); Reverse transcriptase (EC 2.7.7.49); Endonuclease] - Nicotiana tabacum (Common tobacco) & (reliability: 100.0) & (original description: transcript offset:0 AED:0.30 eAED:0.30 QI:0|0|0|0.5|1|1|4|0|383)	NA	0.119112	0.219094	0.118698	0.137932	0.181517	0.317368	0.762374	1.80927	NA	2.5946	2.03131	2.6344	2.50619	0	0
Dm_00003001-RA		hAT transposon superfamily	RNA.regulation of transcription.putative transcription regulator	AT4G15020	(loc_os12g35120.1 : 320.0) no description available & (at4g15020 : 234.0) hAT transposon superfamily; FUNCTIONS IN: protein dimerization activity, DNA binding; INVOLVED IN: biological_process unknown; LOCATED IN: cellular_component unknown; EXPRESSED IN: 19 plant structures; EXPRESSED DURING: 8 growth stages; CONTAINS InterPro DOMAIN/s: HAT dimerisation (InterPro:IPR008906), Zinc finger, BED-type…	NA	0.0638735	0.121465	0.0619656	0.0784073	0.0889336	0.00606209	0.738988	2.61348	6.58768	3.65986	3.09148	3.63736	3.25962	0	0
Dm_00007632-RA		hAT dimerization domain-containing protein	RNA.regulation of transcription.putative transcription regulator, DNA.unspecified	AT3G17450	(at3g17450 : 93.6) hAT dimerisation domain-containing protein; FUNCTIONS IN: protein dimerization activity, DNA binding; INVOLVED IN: biological_process unknown; LOCATED IN: cellular_component unknown; EXPRESSED IN: 22 plant structures; EXPRESSED DURING: 14 growth stages; CONTAINS InterPro DOMAIN/s: HAT dimerisation (InterPro:IPR008906), Zinc finger, BED-type predicted (InterPro:IPR003656), Prote…	NA	0.0548832	0.152509	0.095305	0.212555	0.305888	0.0967362	0.733163	NA	NA	NA	NA	NA	NA	0	0
Dm_00008550-RA	NA	NA	not assigned.unknown	NA	no hits & (original description: transcript offset:0 AED:0.91 eAED:0.91 QI:0|0|0|0.33|0|0.33|3|0|125)	NA	0.183931	0.0747517	0	0.0880778	0.115893	0.0304075	0.729563	NA	NA	NA	NA	NA	NA	0	0
Dm_00015215-RA	NA	NA	not assigned.unknown	NA	(loc_os10g31990.1 : 112.0) no description available & (reliability: 100.0) & (original description: transcript offset:0 AED:0.47 eAED:0.47 QI:0|0|0|0.75|0.33|0.25|4|0|179)	NA	0.140167	0.582445	0.28681	0.0692275	0.423928	0.12083	0.725252	NA	NA	NA	NA	NA	3.25146	0	0
Dm_00009012-RA	NA	NA	not assigned.unknown	NA	(loc_os10g12174.1 : 91.3) no description available & (reliability: 100.0) & (original description: transcript offset:0 AED:0.51 eAED:0.53 QI:0|0|0|0.5|1|1|2|0|227)	NA	0.100955	0.236155	0.207333	0.0552491	0.211735	0.0248056	0.724265	NA	5.09107	NA	NA	NA	3.37023	0	0
Dm_00012233-RA	NA	NA	not assigned.unknown	NA	(loc_os12g25990.1 : 117.0) no description available & (reliability: 100.0) & (original description: transcript offset:0 AED:0.08 eAED:0.08 QI:0|0|0|0.5|1|1|2|0|219)	NA	0.139122	0.0301439	0.0333281	0.0897761	0.04506	0.0257118	0.723149	4.60055	NA	NA	NA	NA	NA	0	0
Dm_00003908-RA	NA	NA	not assigned.unknown	NA	no hits & (original description: transcript offset:0 AED:0.28 eAED:0.28 QI:0|0|0|0.5|1|1|2|0|44)	NA	0	0.210739	0.21318	0.278225	0.447187	0	0.721769	NA	NA	NA	NA	NA	NA	0	0
Dm_00010733-RA	NA	NA	not assigned.unknown	NA	(loc_os08g25640.1 : 131.0) no description available & (reliability: 100.0) & (original description: transcript offset:0 AED:0.33 eAED:0.33 QI:0|0|0|0.25|1|1|4|0|460)	NA	0.0153809	0.0184293	0.0490498	0.0484242	0.0836055	0	0.708575	5.23846	7.03847	4.0564	3.13441	5.27043	3.82429	0	0
Dm_00008944-RA	NA	NA	not assigned.unknown	NA	no hits & (original description: transcript offset:0 AED:0.63 eAED:0.63 QI:0|-1|0|1|-1|1|1|0|164)	NA	0.0754788	0.244161	0.109643	0.166413	0.335706	0.0918456	0.708158	NA	NA	NA	NA	NA	NA	0	0
Dm_00007610-RA	NA	NA	not assigned.unknown	NA	no hits & (original description: transcript offset:0 AED:0.46 eAED:0.46 QI:0|-1|0|1|-1|1|1|0|145)	NA	0.0243973	0.106488	0.0143523	0.118294	0.330195	0	0.705748	NA	5.3716	NA	NA	NA	NA	0	0
Dm_00007208-RA	NA	NA	not assigned.unknown	NA	no hits & (original description: transcript offset:0 AED:0.67 eAED:0.79 QI:0|0|0|0.5|0|0|2|0|82)	NA	0.0970496	0.0285966	0	0	0.0476845	0.0463528	0.701177	NA	NA	NA	NA	NA	NA	0	0
Dm_00012339-RA	FRS5	FAR1-related sequence 5	signalling.light	AT4G38180	(at4g38180 : 309.0) FAR1-related sequence 5 (FRS5); FUNCTIONS IN: zinc ion binding; INVOLVED IN: response to red or far red light; LOCATED IN: cellular_component unknown; EXPRESSED IN: 22 plant structures; EXPRESSED DURING: 13 growth stages; CONTAINS InterPro DOMAIN/s: MULE transposase, conserved domain (InterPro:IPR018289), Transcription factor, FAR1-related (InterPro:IPR004330), Zinc finger, PM…	NA	0	0.209918	0.244387	0.212635	0.233248	0.284524	0.697638	1.74087	NA	NA	NA	7.12124	NA	0	0
Dm_00020697-RA	NA	NA	not assigned.unknown	NA	(loc_os09g06650.1 : 82.0) no description available & (reliability: 100.0) & (original description: transcript offset:0 AED:0.36 eAED:0.37 QI:0|0|0|1|1|1|3|0|462)	NA	0.0497648	0.11525	0.0524995	0.0588439	0.169807	0.0785591	0.695291	2.58211	3.17027	3.87905	NA	3.6627	3.45354	0	0
Dm_00011450-RA		Calcium-binding EF-hand family protein	signalling.calcium	AT2G44310	(at2g44310 : 88.6) Calcium-binding EF-hand family protein; FUNCTIONS IN: calcium ion binding; INVOLVED IN: biological_process unknown; LOCATED IN: cellular_component unknown; EXPRESSED IN: 23 plant structures; EXPRESSED DURING: 14 growth stages; CONTAINS InterPro DOMAIN/s: EF-Hand 1, calcium-binding site (InterPro:IPR018247), EF-HAND 2 (InterPro:IPR018249), EF-hand-like domain (InterPro:IPR011992…	NA	0.19204	0.17698	0.321898	0.160798	0.156855	0.271312	0.690618	NA	NA	NA	NA	NA	NA	0	0
Dm_00003003-RA		hAT dimerization domain-containing protein / transposase-like protein	DNA.synthesis/chromatin structure.retrotransposon/transposase.hat-like transposase	AT5G33406	(at5g33406 : 338.0) hAT dimerisation domain-containing protein / transposase-related; FUNCTIONS IN: protein dimerization activity; INVOLVED IN: biological_process unknown; LOCATED IN: mitochondrion; CONTAINS InterPro DOMAIN/s: HAT dimerisation (InterPro:IPR008906); BEST Arabidopsis thaliana protein match is: hAT transposon superfamily (TAIR:AT4G15020.2); Has 707 Blast hits to 681 proteins in 26 s…	NA	0.162398	0.127239	0.140309	0.133495	0.13317	0.046068	0.688085	2.42627	3.85877	NA	NA	NA	NA	0	0
Dm_00003427-RA	NA	NA	not assigned.unknown	NA	no hits & (original description: transcript offset:23 AED:0.26 eAED:0.26 QI:23|0|0|1|0|0|2|0|74)	NA	0	0.0818371	0.0257986	0.107247	0.0293881	0	0.685792	NA	NA	NA	NA	NA	NA	0	0
Dm_00006231-RA		hAT dimerization domain-containing protein / transposase-like protein	DNA.synthesis/chromatin structure.retrotransposon/transposase.hat-like transposase	AT5G33406	(at5g33406 : 139.0) hAT dimerisation domain-containing protein / transposase-related; FUNCTIONS IN: protein dimerization activity; INVOLVED IN: biological_process unknown; LOCATED IN: mitochondrion; CONTAINS InterPro DOMAIN/s: HAT dimerisation (InterPro:IPR008906); BEST Arabidopsis thaliana protein match is: hAT transposon superfamily (TAIR:AT4G15020.2); Has 707 Blast hits to 681 proteins in 26 s…	NA	0.0274233	0.0657169	0.0535629	0.10397	0.234517	0.0325421	0.678904	NA	NA	NA	NA	NA	NA	0	0
Dm_00010941-RA	NA	NA	not assigned.unknown	NA	(loc_os11g39940.1 : 112.0) no description available & (p08770|tra1_maize : 97.8) Putative AC transposase (ORFA) - Zea mays (Maize) & (reliability: 100.0) & (original description: transcript offset:0 AED:0.39 eAED:0.39 QI:0|0|0|0.6|0.5|0.4|5|0|354)	NA	0.0349676	0.0347481	0.0342581	0.0582979	0.14051	0.0225957	0.67638	4.25209	NA	NA	NA	NA	NA	0	0
Dm_00007672-RA	NA	NA	not assigned.unknown	NA	(loc_os06g44800.1 : 122.0) no description available & (reliability: 100.0) & (original description: transcript offset:0 AED:0.23 eAED:0.23 QI:0|0|0|0.66|0|0.66|3|0|195)	NA	0.0770937	0.415708	0.747833	0.294621	0.551156	0.2998	0.670838	NA	NA	NA	NA	2.95817	NA	0	0
Dm_00017256-RA	NA	NA	not assigned.unknown	NA	(loc_os07g23540.1 : 292.0) no description available & (reliability: 100.0) & (original description: transcript offset:0 AED:0.77 eAED:0.78 QI:0|0|0|0.25|0.66|0.5|4|0|582)	NA	0.0454544	0.121371	0.692906	0.285482	0.383657	0.0357983	0.669474	2.46968	4.14593	NA	NA	3.88277	NA	0	0
Dm_00019787-RA		Leucine-rich repeat protein kinase family protein	signalling.receptor kinases.leucine rich repeat IX	AT3G23750	(at3g23750 : 468.0) Leucine-rich repeat protein kinase family protein; FUNCTIONS IN: protein serine/threonine kinase activity, protein kinase activity, ATP binding; INVOLVED IN: protein amino acid phosphorylation; LOCATED IN: plasma membrane; EXPRESSED IN: 26 plant structures; EXPRESSED DURING: 15 growth stages; CONTAINS InterPro DOMAIN/s: Protein kinase, ATP binding site (InterPro:IPR017441), Pr…	NA	0.389319	0.225219	0.296121	0.360576	0.472398	0.116099	0.666687	1.5419	2.51006	NA	NA	NA	NA	0	0
Dm_00013189-RA	NA	NA	not assigned.unknown	NA	(loc_os02g10280.1 : 91.7) no description available & (p03010|trac9_maize : 83.6) Putative AC9 transposase - Zea mays (Maize) & (reliability: 100.0) & (original description: transcript offset:0 AED:0.50 eAED:0.50 QI:0|0|0|0.66|0.5|0.33|3|0|152)	NA	0.0375698	0.0458113	0	0.136469	0.0594538	0.0870575	0.659397	NA	NA	5.59558	NA	NA	NA	0	0
Dm_00019029-RA	NA	NA	not assigned.unknown	NA	no hits & (original description: transcript offset:0 AED:0.21 eAED:0.21 QI:0|0|0|0.66|1|1|3|0|107)	NA	0.127745	0.302764	0.0840252	0.496221	0.231218	0.039233	0.659014	NA	NA	NA	NA	NA	NA	0	0
Dm_00016792-RA	NA	NA	not assigned.unknown	NA	no hits & (original description: transcript offset:0 AED:0.79 eAED:0.79 QI:0|0|0|0.5|1|1|2|0|166)	NA	0.0479402	0	0	0	0	0	0.647487	NA	NA	NA	NA	NA	NA	0	0
Dm_00010378-RA	NA	NA	not assigned.unknown	NA	(loc_os03g35480.1 : 90.5) no description available & (reliability: 100.0) & (original description: transcript offset:0 AED:0.36 eAED:0.36 QI:0|0|0|0.5|1|1|2|0|236)	NA	0.0803898	0.0180364	0.0440908	0.14581	0.176527	0	0.64733	5.14867	5.95337	NA	NA	NA	NA	0	0
Dm_00016615-RA	NA	NA	not assigned.unknown	NA	no hits & (original description: transcript offset:0 AED:0.49 eAED:0.49 QI:0|-1|0|1|-1|1|1|0|124)	NA	0.0570581	0.0375332	0	0.0495397	0	0.129014	0.645053	NA	NA	NA	NA	NA	NA	0	0
Dm_00017257-RA	NA	NA	not assigned.unknown	NA	(loc_os05g44786.1 : 100.0) no description available & (reliability: 100.0) & (original description: transcript offset:0 AED:0.36 eAED:0.37 QI:0|-1|0|1|-1|1|1|0|159)	NA	0.0359158	0.0773637	0.814893	0.307859	0.37646	0	0.641176	3.03262	5.40821	NA	NA	4.44934	NA	0	0
Dm_00016691-RA	NA	NA	not assigned.unknown	NA	(loc_os06g44800.1 : 95.5) no description available & (reliability: 100.0) & (original description: transcript offset:0 AED:0.40 eAED:0.42 QI:0|-1|0|1|-1|1|1|0|104)	NA	0.119024	0.0631327	0.0200104	0.165947	0.113396	0.054143	0.62998	NA	NA	NA	NA	NA	NA	0	0
Dm_00009928-RA	DAYSLEEPER	BED zinc finger and hAT dimerization domain-containing protein DAYSLEEPER	DNA.unspecified	AT3G42170	(loc_os05g01190.1 : 110.0) no description available & (p08770|tra1_maize : 89.7) Putative AC transposase (ORFA) - Zea mays (Maize) & (at3g42170 : 82.4) transposase-like gene with conserved domains from the family of hAT transposases that includes hobo from Drosophila melanogaster, Activator (Ac) from maize, and Tam3 from snapdragon but lacks several amino acids known to be essential for Ac transp…	NA	0.229429	0.0567569	0	0.0234422	0.0575063	0.0367595	0.627848	NA	NA	6.60873	NA	NA	NA	0	0
Dm_00006105-RA	NA	NA	not assigned.unknown	NA	no hits & (original description: transcript offset:0 AED:0.28 eAED:0.28 QI:0|0|0|0.5|1|1|2|0|86)	NA	0.0925357	0.093953	0.237811	0.230358	0.192261	0.141823	0.625199	NA	NA	NA	NA	NA	NA	0	0
Dm_00011827-RA		hAT dimerization domain-containing protein / transposase-like protein	DNA.synthesis/chromatin structure.retrotransposon/transposase.hat-like transposase	AT5G33406	(at5g33406 : 82.8) hAT dimerisation domain-containing protein / transposase-related; FUNCTIONS IN: protein dimerization activity; INVOLVED IN: biological_process unknown; LOCATED IN: mitochondrion; CONTAINS InterPro DOMAIN/s: HAT dimerisation (InterPro:IPR008906); BEST Arabidopsis thaliana protein match is: hAT transposon superfamily (TAIR:AT4G15020.2); Has 707 Blast hits to 681 proteins in 26 sp…	NA	0.196125	0.0769705	0.0208126	0.137512	0.0828788	0.0361891	0.624264	NA	NA	NA	NA	NA	NA	0	0
Dm_00015028-RA	NA	NA	not assigned.unknown	NA	no hits & (original description: transcript offset:0 AED:0.29 eAED:0.43 QI:0|0|0|0.66|1|1|3|0|287)	NA	0.056876	0.0443696	0.0399339	0.034437	0.0218842	0.0196198	0.62248	3.77587	5.19749	3.77711	4.91828	NA	4.13128	0	0
Dm_00016683-RA	FRS5	FAR1-related sequence 5	DNA.unspecified, signalling.light	AT4G38180	(loc_os02g39220.1 : 129.0) no description available & (at4g38180 : 106.0) FAR1-related sequence 5 (FRS5); FUNCTIONS IN: zinc ion binding; INVOLVED IN: response to red or far red light; LOCATED IN: cellular_component unknown; EXPRESSED IN: 22 plant structures; EXPRESSED DURING: 13 growth stages; CONTAINS InterPro DOMAIN/s: MULE transposase, conserved domain (InterPro:IPR018289), Transcription fact…	NA	0.465578	0.305005	0.320014	0.31006	0.0797736	0.0293562	0.612934	NA	NA	NA	NA	NA	NA	0	0
Dm_00010368-RA		alpha/beta-Hydrolases superfamily protein	lipid metabolism.lipid degradation.lipases.triacylglycerol lipase	AT2G30550	(at2g30550 : 575.0) Encodes a lipase that hydrolyzes phosphatidylcholine, glycolipids as well as triacylglycerols.; alpha/beta-Hydrolases superfamily protein; FUNCTIONS IN: galactolipase activity, triglyceride lipase activity, phospholipase A1 activity; INVOLVED IN: lipid metabolic process; LOCATED IN: chloroplast; EXPRESSED IN: 23 plant structures; EXPRESSED DURING: 10 growth stages; CONTAINS In…	NA	0.653653	0.690647	0.0930429	0.049366	0.0355735	0.0622453	0.612805	NA	3.3283	2.9471	3.97466	NA	3.70131	0	0
Dm_00019402-RA	FRS5	FAR1-related sequence 5	signalling.light	AT4G38180	(loc_os12g12380.3 : 122.0) no description available & (at4g38180 : 118.0) FAR1-related sequence 5 (FRS5); FUNCTIONS IN: zinc ion binding; INVOLVED IN: response to red or far red light; LOCATED IN: cellular_component unknown; EXPRESSED IN: 22 plant structures; EXPRESSED DURING: 13 growth stages; CONTAINS InterPro DOMAIN/s: MULE transposase, conserved domain (InterPro:IPR018289), Transcription fact…	NA	0	0.169728	0.310277	0.279948	0.397337	0.179654	0.612401	NA	NA	NA	NA	NA	NA	0	0
Dm_00016827-RA	HSFA6B	heat shock transcription factor A6B	RNA.regulation of transcription.HSF,Heat-shock transcription factor family	AT3G22830	(loc_os10g28340.3 : 290.0) no description available & (at3g22830 : 279.0) member of Heat Stress Transcription Factor (Hsf) family; heat shock transcription factor A6B (HSFA6B); FUNCTIONS IN: DNA binding, sequence-specific DNA binding transcription factor activity; INVOLVED IN: regulation of transcription, DNA-dependent; LOCATED IN: nucleus; EXPRESSED IN: root; CONTAINS InterPro DOMAIN/s: Winged h…	NA	0.688565	0	0.156667	0.134268	0.0646468	0.521985	0.611693	7.44017	NA	NA	NA	NA	NA	0	0
Dm_00009836-RA	NA	NA	not assigned.unknown	NA	no hits & (original description: transcript offset:0 AED:0.41 eAED:0.41 QI:0|0|0|0.16|1|1|6|0|253)	NA	0.134114	0.0183957	0.0190851	0.0341946	0.0263491	0	0.610858	5.11014	5.95113	5.22897	4.6716	NA	NA	0	0
Dm_00003849-RA	NA	NA	not assigned.unknown	NA	no hits & (original description: transcript offset:0 AED:0.25 eAED:0.26 QI:0|0|0|1|1|1|2|0|161)	NA	0.0848986	0.0988184	0.0882513	0.0381548	0.0951413	0.140774	0.610161	NA	NA	NA	NA	NA	NA	0	0
Dm_00003149-RA	NA	NA	not assigned.unknown	NA	no hits & (original description: transcript offset:0 AED:0.43 eAED:0.43 QI:0|0|0|0.33|1|1|3|0|109)	NA	0.20283	0.130718	0.448612	0.360752	0.493335	0.449809	0.607264	NA	NA	NA	NA	NA	NA	0	0
Dm_00014352-RA	NA	NA	not assigned.unknown	NA	no hits & (original description: transcript offset:0 AED:0.43 eAED:0.55 QI:0|0|0|1|0|0|2|0|92)	NA	0	0	0	0	0	0	0.606747	NA	NA	NA	NA	NA	NA	0	0
Dm_00008416-RA	NA	NA	not assigned.unknown	NA	no hits & (original description: transcript offset:0 AED:0.69 eAED:0.71 QI:0|0|0|0.5|1|1|2|0|94)	NA	0.22068	0.0245659	0.0513673	0	0.19571	0	0.603949	NA	NA	NA	NA	NA	NA	0	0
Dm_00016281-RA	NA	NA	not assigned.unknown	NA	no hits & (original description: transcript offset:0 AED:0.41 eAED:0.66 QI:0|0|0|1|0|0|2|0|81)	NA	0.0545736	0.138517	0.316907	0.422215	0.28643	0.239527	0.598195	NA	NA	NA	NA	NA	NA	0	0
Dm_00001696-RA	NA	NA	not assigned.unknown	NA	(loc_os10g30990.1 : 101.0) no description available & (reliability: 100.0) & (original description: transcript offset:0 AED:0.29 eAED:0.29 QI:0|0|0|0.75|0|0|4|0|133)	NA	0	0.0463781	0.10182	0.0565784	0.156618	0.212748	0.590495	NA	NA	NA	NA	NA	NA	0	0
Dm_00015529-RA	NA	NA	not assigned.unknown	NA	no hits & (original description: transcript offset:0 AED:0.63 eAED:0.63 QI:0|0|0|0.2|1|1|5|0|393)	NA	0.378659	0.153021	0.0431448	0.243264	0.0929605	0.468729	0.587939	NA	NA	3.97405	2.69964	NA	NA	0	0
Dm_00003541-RA		hAT dimerization domain-containing protein / transposase-like protein	DNA.synthesis/chromatin structure.retrotransposon/transposase.hat-like transposase	AT5G33406	(at5g33406 : 137.0) hAT dimerisation domain-containing protein / transposase-related; FUNCTIONS IN: protein dimerization activity; INVOLVED IN: biological_process unknown; LOCATED IN: mitochondrion; CONTAINS InterPro DOMAIN/s: HAT dimerisation (InterPro:IPR008906); BEST Arabidopsis thaliana protein match is: hAT transposon superfamily (TAIR:AT4G15020.2); Has 707 Blast hits to 681 proteins in 26 s…	NA	0.0283008	0.0187594	0	0.136374	0.113311	0.0304075	0.58627	NA	NA	NA	NA	NA	NA	0	0
Dm_00014548-RA	NA	NA	not assigned.unknown	NA	no hits & (original description: transcript offset:0 AED:0.54 eAED:0.54 QI:0|-1|0|1|-1|1|1|0|209)	NA	0	0.0680025	0.0629324	0.0653964	0.0919994	0.0181863	0.585408	NA	NA	NA	NA	5.62584	NA	0	0
Dm_00008620-RA	NA	NA	not assigned.unknown	NA	(loc_os02g32170.1 : 104.0) no description available & (reliability: 100.0) & (original description: transcript offset:0 AED:0.37 eAED:0.37 QI:0|0|0|1|1|1|2|0|172)	NA	0	0	0	0.312631	0.571586	0.248367	0.584508	6.36197	NA	5.58183	NA	5.32574	NA	0	0
Dm_00003542-RA		hAT transposon superfamily protein	RNA.regulation of transcription.putative transcription regulator, DNA.unspecified	AT1G43260	(loc_os12g35220.1 : 135.0) no description available & (at1g43260 : 110.0) hAT transposon superfamily protein; CONTAINS InterPro DOMAIN/s: Protein of unknown function DUF659 (InterPro:IPR007021); BEST Arabidopsis thaliana protein match is: hAT transposon superfamily protein (TAIR:AT5G31412.1); Has 599 Blast hits to 592 proteins in 25 species: Archae - 0; Bacteria - 0; Metazoa - 11; Fungi - 2; Plan…	NA	0.183858	0.0619432	0.00618144	0.199742	0.132109	0.100771	0.581244	NA	NA	5.6398	NA	NA	NA	0	0
Dm_00007989-RA	NA	NA	not assigned.unknown	NA	no hits & (original description: transcript offset:0 AED:0.48 eAED:0.49 QI:0|-1|0|1|-1|1|1|0|106)	NA	0.0955761	0.0221219	0.0196329	0.0918264	0.036888	0.150922	0.567968	NA	NA	NA	NA	NA	NA	0	0
Dm_00005854-RA	DAYSLEEPER	BED zinc finger and hAT dimerization domain-containing protein DAYSLEEPER	DNA.unspecified	AT3G42170	(loc_os11g39940.1 : 293.0) no description available & (p08770|tra1_maize : 204.0) Putative AC transposase (ORFA) - Zea mays (Maize) & (at3g42170 : 155.0) transposase-like gene with conserved domains from the family of hAT transposases that includes hobo from Drosophila melanogaster, Activator (Ac) from maize, and Tam3 from snapdragon but lacks several amino acids known to be essential for Ac tran…	NA	0.0659727	0.0411338	0.0129152	0.251718	0.186528	0.322865	0.566132	3.78241	NA	5.44901	NA	3.09454	NA	0	0
Dm_00004613-RA	NA	NA	not assigned.unknown	NA	no hits & (original description: transcript offset:0 AED:0.45 eAED:0.56 QI:0|0|0|1|1|1|2|0|65)	NA	0.0878555	0.173164	0.154558	0.281215	0.205118	0.274272	0.564661	NA	NA	NA	NA	NA	NA	0	0
Dm_00007630-RA	NA	NA	not assigned.unknown	NA	no hits & (original description: transcript offset:0 AED:0.40 eAED:0.44 QI:0|-1|0|1|-1|1|1|0|117)	NA	0.0604719	0.0200421	0	0	0.167636	0.132134	0.561989	NA	NA	NA	NA	NA	NA	0	0
Dm_00006346-RA	NA	NA	not assigned.unknown	NA	(loc_os12g35220.1 : 82.0) no description available & (reliability: 100.0) & (original description: transcript offset:0 AED:0.25 eAED:0.43 QI:0|0|0|0.8|0|0|5|0|249)	NA	0.0355057	0.0466563	0.0293126	0.192487	0.230124	0.0378788	0.561783	NA	NA	NA	NA	NA	NA	0	0
Dm_00013554-RA	NA	NA	not assigned.unknown	NA	no hits & (original description: transcript offset:0 AED:0.13 eAED:0.15 QI:0|-1|0|1|-1|1|1|0|154)	NA	0.0229715	0.368953	0.272461	0.821618	0.635502	0.354935	0.557828	NA	NA	NA	NA	NA	NA	0	0
Dm_00018824-RA	FRS5	FAR1-related sequence 5	signalling.light	AT4G38180	(loc_os01g63380.1 : 119.0) no description available & (at4g38180 : 117.0) FAR1-related sequence 5 (FRS5); FUNCTIONS IN: zinc ion binding; INVOLVED IN: response to red or far red light; LOCATED IN: cellular_component unknown; EXPRESSED IN: 22 plant structures; EXPRESSED DURING: 13 growth stages; CONTAINS InterPro DOMAIN/s: MULE transposase, conserved domain (InterPro:IPR018289), Transcription fact…	NA	0.033658	0.0218133	0.0507111	0.0444127	0.0327845	0.0139466	0.553574	NA	NA	NA	NA	NA	NA	0	0
Dm_00002382-RA	CDC48C	cell division cycle 48C	protein.degradation.AAA type, protein.synthesis.ribosome biogenesis.export from nucleus	AT3G01610	(at3g01610 : 201.0) AAA-type ATPase - Over 90% homologous to CDC48a; cell division cycle 48C (CDC48C); FUNCTIONS IN: nucleoside-triphosphatase activity, ATPase activity, nucleotide binding, ATP binding; INVOLVED IN: embryo development ending in seed dormancy; EXPRESSED IN: 21 plant structures; EXPRESSED DURING: 11 growth stages; CONTAINS InterPro DOMAIN/s: ATPase, AAA-type, core (InterPro:IPR0039…	NA	0.154395	0.103935	0.181921	0.283233	0.0813785	0.204973	0.549096	NA	NA	NA	NA	NA	NA	0	0
Dm_00013623-RA	NA	NA	not assigned.unknown	NA	no hits & (original description: transcript offset:0 AED:0.68 eAED:0.68 QI:0|0|0|0.5|1|1|2|0|109)	NA	0.0730098	0.324991	0.29532	0.348073	0.129943	0.0348709	0.538084	NA	NA	NA	NA	NA	NA	0	0
Dm_00005213-RA		RNA-directed DNA polymerase (reverse transcriptase)-related family protein	not assigned.unknown	AT3G24255	(loc_os09g37310.1 : 126.0) no description available & (at3g24255 : 102.0) RNA-directed DNA polymerase (reverse transcriptase)-related family protein; FUNCTIONS IN: molecular_function unknown; INVOLVED IN: biological_process unknown; LOCATED IN: cellular_component unknown; BEST Arabidopsis thaliana protein match is: unknown protein (TAIR:AT3G23910.1); Has 169 Blast hits to 169 proteins in 55 speci…	NA	0.040412	0.0467425	0.00559432	0.0689625	0.259483	0.0264215	0.537077	3.5197	4.46694	5.6572	NA	3.56648	NA	0	0
Dm_00007143-RA		TTF-type zinc finger protein with HAT dimerization domain-containing protein	DNA.synthesis/chromatin structure.retrotransposon/transposase.hat-like transposase	AT1G19260	(loc_os01g18920.1 : 206.0) no description available & (at1g19260 : 191.0) TTF-type zinc finger protein with HAT dimerisation domain; FUNCTIONS IN: protein dimerization activity; INVOLVED IN: biological_process unknown; LOCATED IN: cellular_component unknown; CONTAINS InterPro DOMAIN/s: HAT dimerisation (InterPro:IPR008906), Zinc finger, TTF-type (InterPro:IPR006580); BEST Arabidopsis thaliana pro…	NA	0.103555	0.194717	0.0701486	0.131497	0.288315	0.145384	0.533081	NA	NA	NA	NA	NA	NA	0	0
Dm_00017579-RA	NA	NA	not assigned.unknown	NA	no hits & (original description: transcript offset:0 AED:0.46 eAED:0.46 QI:0|0|0|0.16|1|1|6|0|337)	NA	0.0732421	0.0755732	0.237487	0.156795	0.1746	0	0.523514	2.75457	6.13403	NA	NA	NA	NA	0	0
Dm_00008563-RA	NA	NA	not assigned.unknown	NA	no hits & (original description: transcript offset:0 AED:0.47 eAED:0.47 QI:0|-1|0|1|-1|1|1|0|148)	NA	0.125479	0.166982	0.299644	0.190583	0.300536	0.0540464	0.500887	NA	NA	NA	NA	NA	NA	0	0
Dm_00002681-RA	NA	NA	not assigned.unknown	NA	no hits & (original description: transcript offset:0 AED:0.08 eAED:0.08 QI:0|-1|0|1|-1|1|1|0|92)	NA	0.11012	0.57759	0.0567148	0.413064	0	0.10252	0.494019	NA	NA	NA	NA	NA	NA	0	0
Dm_00013875-RA	NA	NA	not assigned.unknown	NA	no hits & (original description: transcript offset:0 AED:0.95 eAED:0.95 QI:0|0|0|0.5|1|1|2|0|150)	NA	0.105611	0.0411219	0.0416217	0	0.0183747	0	0.4923	NA	NA	NA	NA	NA	NA	0	0
Dm_00007638-RA	NA	NA	not assigned.unknown	NA	no hits & (original description: transcript offset:0 AED:0.34 eAED:0.34 QI:0|-1|0|1|-1|1|1|0|123)	NA	0.273154	0.0346065	0.19494	0.177802	0.201141	0.0618038	0.489547	NA	NA	NA	NA	NA	NA	0	0
Dm_00019874-RA	FRS5	FAR1-related sequence 5	RNA.regulation of transcription.unclassified, signalling.light	AT4G38180	(loc_os04g28580.1 : 92.4) no description available & (at4g38180 : 86.7) FAR1-related sequence 5 (FRS5); FUNCTIONS IN: zinc ion binding; INVOLVED IN: response to red or far red light; LOCATED IN: cellular_component unknown; EXPRESSED IN: 22 plant structures; EXPRESSED DURING: 13 growth stages; CONTAINS InterPro DOMAIN/s: MULE transposase, conserved domain (InterPro:IPR018289), Transcription factor…	NA	0	0	0.0215559	0.0708773	0.0649526	0.0714185	0.477142	6.45504	NA	NA	NA	NA	NA	0	0
Dm_00020052-RA	TBL19	TRICHOME BIREFRINGENCE-LIKE 19	not assigned.unknown	AT5G15900	(loc_os01g46410.1 : 86.7) no description available & (at5g15900 : 84.0) Encodes a member of the TBL (TRICHOME BIREFRINGENCE-LIKE) gene family containing a plant-specific DUF231 (domain of unknown function) domain. TBL gene family has 46 members, two of which (TBR/AT5G06700 and TBL3/AT5G01360) have been shown to be involved in the synthesis and deposition of secondary wall cellulose, presumably by…	NA	0.575296	0.305158	0.197315	0.382792	0.310459	0.125044	0.467871	NA	NA	NA	NA	NA	NA	0	0
Dm_00010351-RA	NA	NA	not assigned.unknown	NA	no hits & (original description: transcript offset:0 AED:0.70 eAED:0.80 QI:0|0|0|0.5|0|0|2|0|62)	NA	0.163404	0.0308335	0	0.0784967	0.170588	0	0.456017	NA	NA	NA	NA	NA	NA	0	0
Dm_00004646-RA	NA	NA	not assigned.unknown	NA	(loc_os09g05120.1 : 124.0) no description available & (reliability: 100.0) & (original description: transcript offset:0 AED:0.34 eAED:0.34 QI:0|0|0|0.66|1|1|3|0|332)	NA	0.0133146	0.0128211	0.0208121	0.0365543	0.0389973	0.0252888	0.446051	5.09904	NA	NA	NA	NA	NA	0	0
Dm_00009319-RA	NA	NA	not assigned.unknown	NA	no hits & (original description: transcript offset:0 AED:0.26 eAED:0.26 QI:0|-1|0|1|-1|1|1|0|75)	NA	0.123309	0.0312656	0.0277478	0.0648906	0	0.0750784	0.443595	NA	NA	NA	NA	NA	NA	0	0
Dm_00013764-RA	NA	NA	not assigned.unknown	NA	no hits & (original description: transcript offset:0 AED:0.34 eAED:0.34 QI:0|0|0|1|0|0|2|0|84)	NA	0	0.0274904	0.169148	0.0298608	0.187692	0.0452492	0.442779	NA	NA	NA	NA	NA	NA	0	0
Dm_00008961-RA		hAT transposon superfamily protein	DNA.unspecified	AT1G43260	(at1g43260 : 109.0) hAT transposon superfamily protein; CONTAINS InterPro DOMAIN/s: Protein of unknown function DUF659 (InterPro:IPR007021); BEST Arabidopsis thaliana protein match is: hAT transposon superfamily protein (TAIR:AT5G31412.1); Has 599 Blast hits to 592 proteins in 25 species: Archae - 0; Bacteria - 0; Metazoa - 11; Fungi - 2; Plants - 577; Viruses - 0; Other Eukaryotes - 9 (source: N…	NA	0.0755175	0.168618	0.151168	0.181312	0.175979	0.0209996	0.436211	NA	NA	NA	NA	NA	NA	0	0
Dm_00008169-RA	NA	NA	not assigned.unknown	NA	no hits & (original description: transcript offset:0 AED:0.38 eAED:0.38 QI:0|0|0|0.5|0|0|2|0|129)	NA	0.0342672	0.0179007	0	0.131805	0.0640977	0.0294646	0.411252	NA	NA	NA	NA	NA	NA	0	0
Dm_00007645-RA	NA	NA	not assigned.unknown	NA	no hits & (original description: transcript offset:0 AED:0.23 eAED:0.27 QI:0|-1|0|1|-1|1|1|0|59)	NA	0.0749231	0	0	0	0	0	0.410625	NA	NA	NA	NA	NA	NA	0	0
Dm_00010803-RA	NA	NA	not assigned.unknown	NA	no hits & (original description: transcript offset:0 AED:0.55 eAED:0.55 QI:0|0|0|0.5|1|1|2|0|188)	NA	0	0	0.0110696	0	0.0354592	0	0.384803	NA	NA	NA	NA	NA	NA	0	0
Dm_00006117-RA	NA	NA	not assigned.unknown	NA	no hits & (original description: transcript offset:0 AED:0.50 eAED:0.50 QI:0|0|0|1|0|0.5|2|0|154)	NA	0.12059	0.0124135	0	0	0.0253905	0.0731283	0.373354	NA	NA	NA	NA	NA	NA	0	0
Dm_00010480-RA		GDSL-like Lipase/Acylhydrolase superfamily protein	misc.GDSL-motif lipase	AT1G29670	(at1g29670 : 298.0) GDSL-like Lipase/Acylhydrolase superfamily protein; FUNCTIONS IN: hydrolase activity, acting on ester bonds, carboxylesterase activity; INVOLVED IN: lipid metabolic process; LOCATED IN: apoplast, cell wall, chloroplast; EXPRESSED IN: 23 plant structures; EXPRESSED DURING: 14 growth stages; CONTAINS InterPro DOMAIN/s: Lipase, GDSL (InterPro:IPR001087); BEST Arabidopsis thaliana…	NA	0.6093	0.880763	0.00525527	0.105632	0.893669	0.659677	18.1625	4.37251	4.78557	10.8224	4.32006	4.91464	7.35343	0.311382	0.394533
Dm_00001449-RA	SAG12	senescence-associated gene 12	protein.degradation.cysteine protease	AT5G45890	(loc_os04g13090.1 : 103.0) no description available & (at5g45890 : 94.7) Senescence-associated gene 12 (SAG12) encoding a cysteine protease influenced by cytokinin, auxin, and sugars.Localized to special vacuole found during senescence called senescence associated vacuoles which are different from central vacuole in the tonoplast composition and pH.; senescence-associated gene 12 (SAG12); CONTAIN…	NA	0.0909002	0.661495	0.102772	0.0743425	1.17227	0.049391	12.7834	4.27394	8.1358	6.84849	3.44773	7.16289	7.29728	0.416117	0.542697
Dm_00017908-RA		Eukaryotic aspartyl protease family protein	protein.degradation.aspartate protease	AT2G03200	(at2g03200 : 324.0) Eukaryotic aspartyl protease family protein; FUNCTIONS IN: aspartic-type endopeptidase activity; INVOLVED IN: proteolysis; LOCATED IN: endomembrane system; EXPRESSED IN: 10 plant structures; EXPRESSED DURING: 4 anthesis, C globular stage, petal differentiation and expansion stage; CONTAINS InterPro DOMAIN/s: Peptidase aspartic (InterPro:IPR021109), Peptidase aspartic, catalyti…	NA	0.509021	0.137728	0.157256	1.01174	0.845698	0.229345	6.17779	5.48456	4.72747	5.29517	2.87154	3.59721	NA	0.535352	0.723214
Dm_00010718-RA	NA	NA	not assigned.unknown	NA	no hits & (original description: transcript offset:0 AED:0.44 eAED:0.51 QI:0|0|0|1|0|0|2|0|72)	NA	0.1474	0.391814	0.477542	1.21329	0.726345	0.105581	9.27996	4.55932	6.2496	4.11018	3.67631	5.6931	2.92257	0.569481	0.777769
Dm_00005686-RA	NA	NA	not assigned.unknown	NA	no hits & (original description: transcript offset:0 AED:0.74 eAED:0.74 QI:0|0|0|0.25|1|1|8|0|267)	NA	0.344138	0.378584	0.368246	0.630657	0.852374	0.15851	6.02026	3.98102	5.31475	4.12964	2.82813	4.0761	3.20293	0.607435	0.840274
Dm_00003618-RA	SHN1	Integrase-type DNA-binding superfamily protein	hormone metabolism.ethylene.signal transduction	AT1G15360	(loc_os02g10760.1 : 105.0) no description available & (at1g15360 : 95.5) Encodes a member of the ERF (ethylene response factor) subfamily B-6 of ERF/AP2 transcription factor family. The protein contains one AP2 domain. There are 12 members in this subfamily including RAP2.11. This gene is involved in wax biosynthesis. Over-expression of the gene results in glossy leaf phenotype and increased drou…	NA	1.68101	0.289392	0	0.0810445	0.206229	0.37814	9.37927	4.99638	4.59761	9.99895	5.51461	2.50362	7.22583	0.614789	0.85263
Dm_00012093-RA		hAT dimerization domain-containing protein	RNA.regulation of transcription.putative transcription regulator, DNA.unspecified	AT3G17450	(loc_os12g35120.1 : 182.0) no description available & (at3g17450 : 150.0) hAT dimerisation domain-containing protein; FUNCTIONS IN: protein dimerization activity, DNA binding; INVOLVED IN: biological_process unknown; LOCATED IN: cellular_component unknown; EXPRESSED IN: 22 plant structures; EXPRESSED DURING: 14 growth stages; CONTAINS InterPro DOMAIN/s: HAT dimerisation (InterPro:IPR008906), Zinc…	NA	0.577566	0.408514	0.585286	0.824042	0.70603	0.243235	5.57048	3.76282	4.61116	3.30433	3.00321	3.24282	2.74394	0.617861	0.857817
Dm_00019935-RA	PRB1	basic pathogenesis-related protein 1	stress.biotic.PR-proteins, stress.biotic	AT2G14580	(p08299|pr1a_tobac : 196.0) Pathogenesis-related protein 1A precursor (PR-1A) - Nicotiana tabacum (Common tobacco) & (loc_os07g03730.1 : 191.0) no description available & (at2g14580 : 187.0) pathogenesis related protein, encodes a basic PR1-like protein. Expresses in flowers, roots, and not in leaves and responses to ethylene and methyl jasmonate. Salicylic acid represses gene expression.; basic …	NA	0.0675812	0	0.264535	0.624072	0.84156	0.0333188	3.99653	9.13974	7.1388	3.92811	NA	6.198	2.67002	0.621133	0.863358
Dm_00003312-RA	KCS5	3-ketoacyl-CoA synthase 5	secondary metabolism.wax	AT1G25450	(at1g25450 : 562.0) Encodes KCS5, a member of the 3-ketoacyl-CoA synthase family involved in the biosynthesis of VLCFA (very long chain fatty acids).; 3-ketoacyl-CoA synthase 5 (KCS5); FUNCTIONS IN: fatty acid elongase activity; INVOLVED IN: in 6 processes; LOCATED IN: endoplasmic reticulum, membrane; EXPRESSED IN: 22 plant structures; EXPRESSED DURING: 13 growth stages; CONTAINS InterPro DOMAIN/…	NA	0.243907	0.1296	0.187522	0.460631	0.762959	0.372562	3.29409	4.67326	3.15406	4.08568	2.1083	3.758	2.84609	0.682524	0.970803
Dm_00016136-RA		DNAse I-like superfamily protein	not assigned.unknown	AT1G43760	(loc_os01g33750.1 : 110.0) no description available & (at1g43760 : 93.6) DNAse I-like superfamily protein; CONTAINS InterPro DOMAIN/s: Endonuclease/exonuclease/phosphatase (InterPro:IPR005135), RNA-directed DNA polymerase (reverse transcriptase), related (InterPro:IPR015706); BEST Arabidopsis thaliana protein match is: DNAse I-like superfamily protein (TAIR:AT1G40390.1); Has 1816 Blast hits to 17…	NA	0.235468	0.396508	0.415026	0.885008	0.74278	0.621464	4.17577	3.40102	2.763	3.39031	2.50555	4.12306	2.23229	0.714508	1.02982
Dm_00015364-RA	NA	NA	not assigned.unknown	NA	(loc_os01g33460.1 : 122.0) no description available & (reliability: 100.0) & (original description: transcript offset:0 AED:0.39 eAED:0.39 QI:0|0|0|0.28|1|1|7|0|557)	NA	0.385699	0.622925	0.437078	1.10509	0.814757	0.218804	4.47084	2.83011	4.37142	3.31774	2.45141	3.52867	2.01986	0.718291	1.03696
Dm_00006063-RA	YUC8	Flavin-binding monooxygenase family protein	misc.oxidases - copper, flavone etc	AT4G28720	(at4g28720 : 599.0) Auxin biosynthetic gene regulated by RVE1. Overexpression leads to suppression of bri1 phenotype.; YUCCA 8 (YUC8); FUNCTIONS IN: NADP or NADPH binding, oxidoreductase activity, monooxygenase activity, FAD binding, flavin-containing monooxygenase activity; INVOLVED IN: brassinosteroid mediated signaling pathway, auxin biosynthetic process; EXPRESSED IN: 11 plant structures; EXP…	NA	1.2088	0.270777	0.479554	0.865642	1.9055	0.614355	16.8802	5.96104	4.79411	5.18533	3.14979	3.80397	4.27001	0.808932	1.06919
Dm_00010717-RA		hAT dimerization domain-containing protein / transposase-like protein	DNA.synthesis/chromatin structure.retrotransposon/transposase.hat-like transposase	AT5G33406	(at5g33406 : 108.0) hAT dimerisation domain-containing protein / transposase-related; FUNCTIONS IN: protein dimerization activity; INVOLVED IN: biological_process unknown; LOCATED IN: mitochondrion; CONTAINS InterPro DOMAIN/s: HAT dimerisation (InterPro:IPR008906); BEST Arabidopsis thaliana protein match is: hAT transposon superfamily (TAIR:AT4G15020.2); Has 707 Blast hits to 681 proteins in 26 s…	NA	0.120433	0.206572	0.331358	1.07974	0.568239	0.164335	5.92598	4.80574	5.09496	4.18578	3.44522	5.74576	2.4874	0.746032	1.09048
Dm_00010113-RA	NA	NA	not assigned.unknown	NA	(loc_os03g32600.1 : 87.0) no description available & (reliability: 100.0) & (original description: transcript offset:0 AED:0.37 eAED:0.37 QI:0|0|0|0.33|1|1|6|0|338)	NA	0.235207	0.28636	0.40296	0.811393	1.04307	0.0745195	4.54822	3.99188	5.86731	3.49322	2.12782	4.26743	2.48069	0.748044	1.09445
Dm_00010332-RA		hAT dimerization domain-containing protein / transposase-like protein	DNA.synthesis/chromatin structure.retrotransposon/transposase.hat-like transposase, RNA.regulation of transcription.putative transcription regulator	AT5G33406	(loc_os12g35220.1 : 211.0) no description available & (at5g33406 : 175.0) hAT dimerisation domain-containing protein / transposase-related; FUNCTIONS IN: protein dimerization activity; INVOLVED IN: biological_process unknown; LOCATED IN: mitochondrion; CONTAINS InterPro DOMAIN/s: HAT dimerisation (InterPro:IPR008906); BEST Arabidopsis thaliana protein match is: hAT transposon superfamily (TAIR:AT…	NA	0.403831	0.615255	0.814867	0.901909	0.899928	0.20703	4.11741	2.74239	4.30966	2.33811	2.18923	3.30491	2.20184	0.753712	1.10569
Dm_00015754-RA		Tetratricopeptide repeat (TPR)-like superfamily protein	not assigned.no ontology.pentatricopeptide (PPR) repeat-containing protein	AT4G37380	(at4g37380 : 141.0) Tetratricopeptide repeat (TPR)-like superfamily protein; CONTAINS InterPro DOMAIN/s: Pentatricopeptide repeat (InterPro:IPR002885); BEST Arabidopsis thaliana protein match is: Tetratricopeptide repeat (TPR)-like superfamily protein (TAIR:AT5G66520.1); Has 33786 Blast hits to 13504 proteins in 252 species: Archae - 0; Bacteria - 14; Metazoa - 55; Fungi - 76; Plants - 33202; Vir…	NA	0.450426	0.142227	0.0491096	0.268399	0.578565	0.248985	3.9801	4.82904	4.04996	6.24723	2.83345	3.13271	3.97012	0.788041	1.17608
Dm_00011930-RA	NA	NA	not assigned.unknown	NA	no hits & (original description: transcript offset:0 AED:0.46 eAED:0.48 QI:0|0|0|0.42|1|1|7|0|298)	NA	0.410349	0.391256	0.819668	0.754121	0.975733	0.340004	3.70298	3.2318	3.385	2.17559	1.9024	3.12268	2.27446	0.788777	1.17764
Dm_00011437-RA	DAYSLEEPER	BED zinc finger and hAT dimerization domain-containing protein DAYSLEEPER	DNA.unspecified	AT3G42170	(loc_os10g34860.1 : 182.0) no description available & (at3g42170 : 99.8) transposase-like gene with conserved domains from the family of hAT transposases that includes hobo from Drosophila melanogaster, Activator (Ac) from maize, and Tam3 from snapdragon but lacks several amino acids known to be essential for Ac transposition5. The DAYSLEEPER gene lacks 8 bp duplications and TIRs (a common featur…	NA	0.177677	0.226544	0.650196	1.32807	0.796969	0.316225	4.91116	4.46208	4.08119	2.88411	2.63349	4.88387	1.8958	0.795341	1.19161
Dm_00021072-RA	SAG12	senescence-associated gene 12	protein.degradation.cysteine protease	AT5G45890	(loc_os04g13090.1 : 323.0) no description available & (at5g45890 : 291.0) Senescence-associated gene 12 (SAG12) encoding a cysteine protease influenced by cytokinin, auxin, and sugars.Localized to special vacuole found during senescence called senescence associated vacuoles which are different from central vacuole in the tonoplast composition and pH.; senescence-associated gene 12 (SAG12); CONTAI…	NA	0.016649	0.0124099	0.310025	0.998106	0.912398	0.0286554	8.71679	9.434	8.38485	4.79033	3.26092	9.28361	3.12925	0.892147	1.19654
Dm_00001451-RA	SAG12	senescence-associated gene 12	protein.degradation.cysteine protease	AT5G45890	(loc_os04g13140.1 : 296.0) no description available & (at5g45890 : 273.0) Senescence-associated gene 12 (SAG12) encoding a cysteine protease influenced by cytokinin, auxin, and sugars.Localized to special vacuole found during senescence called senescence associated vacuoles which are different from central vacuole in the tonoplast composition and pH.; senescence-associated gene 12 (SAG12); CONTAI…	NA	0.0494199	1.11147	0.150669	0.0122357	1.51942	0.0479454	11.1454	3.32837	7.97991	6.21826	2.87707	7.97401	9.23336	0.903978	1.21658
Dm_00020146-RA	NA	NA	not assigned.unknown	NA	(loc_os04g13790.1 : 125.0) no description available & (reliability: 100.0) & (original description: transcript offset:0 AED:0.09 eAED:0.09 QI:0|0|0|0.5|1|1|2|0|287)	NA	0.393853	0.688188	0.644735	0.586402	1.47096	0.147464	4.47318	2.68317	4.99343	2.74381	1.60783	3.4533	2.89897	0.807233	1.2174
Dm_00019842-RA	NA	NA	not assigned.unknown	NA	no hits & (original description: transcript offset:0 AED:0.40 eAED:0.40 QI:0|-1|0|1|-1|1|1|0|100)	NA	0.786234	0.0807996	0.57193	0.048668	0.224297	0	1.19837	NA	5.57897	NA	NA	NA	NA	0.811245	1.22624
Dm_00013220-RA	NA	NA	not assigned.unknown	NA	no hits & (original description: transcript offset:0 AED:0.67 eAED:0.67 QI:0|0|0|1|0|0|2|0|100)	NA	0.454802	0.635149	0.500353	0.981601	0.57617	0.156158	3.64795	2.50395	4.72409	2.87834	2.63428	2.91976	1.84265	0.811319	1.22641
Dm_00007973-RA		RNA-binding (RRM/RBD/RNP motifs) family protein	RNA.RNA binding	AT5G55550	(at5g55550 : 152.0) RNA-binding (RRM/RBD/RNP motifs) family protein; FUNCTIONS IN: RNA binding, nucleotide binding, nucleic acid binding; EXPRESSED IN: 23 plant structures; EXPRESSED DURING: 15 growth stages; CONTAINS InterPro DOMAIN/s: RNA recognition motif, RNP-1 (InterPro:IPR000504), Nucleotide-binding, alpha-beta plait (InterPro:IPR012677); BEST Arabidopsis thaliana protein match is: RNA-bind…	NA	0.479871	0.586192	0.390486	1.15489	0.556291	0.412977	3.84352	2.71145	3.15443	3.29345	2.79853	2.9201	1.74449	0.815906	1.23661
Dm_00002808-RA	NA	NA	not assigned.unknown	NA	no hits & (original description: transcript offset:0 AED:0.61 eAED:0.61 QI:0|0|0|0.5|1|1|2|0|137)	NA	0.634954	0.448185	0.649209	0.716139	0.740565	0.0411013	2.93996	2.71552	6.38197	2.27806	1.98571	2.16131	2.05145	0.833482	1.27671
Dm_00011951-RA	FRS5	FAR1-related sequence 5	signalling.light	AT4G38180	(loc_os04g44630.1 : 118.0) no description available & (at4g38180 : 115.0) FAR1-related sequence 5 (FRS5); FUNCTIONS IN: zinc ion binding; INVOLVED IN: response to red or far red light; LOCATED IN: cellular_component unknown; EXPRESSED IN: 22 plant structures; EXPRESSED DURING: 13 growth stages; CONTAINS InterPro DOMAIN/s: MULE transposase, conserved domain (InterPro:IPR018289), Transcription fact…	NA	0.637609	0.446476	0.668479	0.718879	0.931485	0.176512	2.50938	2.46252	3.81885	NA	NA	NA	NA	0.835494	1.28141
Dm_00000849-RA		serine/threonine-protein phosphatase 7 long form-like protein	not assigned.unknown	AT1G32120	(at1g32120 : 310.0) FUNCTIONS IN: molecular_function unknown; INVOLVED IN: biological_process unknown; LOCATED IN: membrane; EXPRESSED IN: 14 plant structures; EXPRESSED DURING: 4 anthesis, C globular stage, F mature embryo stage, petal differentiation and expansion stage, E expanded cotyledon stage; CONTAINS InterPro DOMAIN/s: Aminotransferase-like, plant mobile domain (InterPro:IPR019557), Prot…	NA	0.455634	0.965243	0.749959	0.638761	0.734558	0.383284	2.78263	1.51731	2.84692	1.88415	1.9087	2.56523	2.14118	0.83565	1.28178
Dm_00007760-RA	NA	NA	not assigned.unknown	NA	no hits & (original description: transcript offset:0 AED:0.96 eAED:0.96 QI:0|-1|0|1|-1|1|1|0|67)	NA	0.184754	0.479785	0.243128	0.440305	0.940281	0.182042	3.14227	2.73026	3.99884	3.63607	NA	4.00132	NA	0.837925	1.28712
Dm_00011247-RA	NA	NA	not assigned.unknown	NA	no hits & (original description: transcript offset:0 AED:0.51 eAED:0.57 QI:0|0|0|0.2|0.75|0.6|5|0|237)	NA	0.218115	0.455115	0.602798	0.803101	0.818303	0.681482	1.98938	2.12309	NA	1.75719	NA	3.09681	NA	0.863464	1.34942
Dm_00001444-RA	NA	NA	not assigned.unknown	NA	no hits & (original description: transcript offset:0 AED:0.60 eAED:0.68 QI:0|0|0|1|0|0|4|0|198)	NA	0	0.0448232	0.530637	0.372611	0.922173	0.0496405	1.33573	4.90472	4.86524	NA	NA	6.72832	NA	0.864186	1.35124
Dm_00013695-RA	POP1	ribonuclease Ps	not assigned.unknown	AT2G47300	(at2g47300 : 728.0) ribonuclease Ps; FUNCTIONS IN: ribonuclease P activity; INVOLVED IN: RNA processing; LOCATED IN: cellular_component unknown; EXPRESSED IN: shoot apex, embryo, sperm cell, flower, seed; EXPRESSED DURING: F mature embryo stage, petal differentiation and expansion stage, E expanded cotyledon stage, D bilateral stage; CONTAINS InterPro DOMAIN/s: POPLD (InterPro:IPR012590); Has 176…	NA	0.363552	0.818495	0.929689	0.813749	0.929918	0.803089	2.63375	1.67623	1.69748	1.49309	1.49219	2.78919	1.69872	0.864554	1.35218
Dm_00019226-RA	NA	NA	not assigned.unknown	NA	no hits & (original description: transcript offset:0 AED:0.45 eAED:0.45 QI:0|0|0|1|1|0.5|2|0|64)	NA	0.267685	0.241821	0.162585	0.861789	0.577798	0.419726	3.36924	3.81638	NA	3.86997	NA	3.93529	NA	0.867288	1.35915
Dm_00005271-RA		DNA/RNA-binding protein Kin17, conserved region	RNA.regulation of transcription.unclassified	AT1G55460	(at1g55460 : 506.0) DNA/RNA-binding protein Kin17, conserved region; FUNCTIONS IN: zinc ion binding; INVOLVED IN: biological_process unknown; LOCATED IN: intracellular; EXPRESSED IN: 24 plant structures; EXPRESSED DURING: 15 growth stages; CONTAINS InterPro DOMAIN/s: Zinc finger, C2H2-like (InterPro:IPR015880), DNA/RNA-binding protein Kin17, conserved region (InterPro:IPR019447), KOW (InterPro:IP…	NA	0.0345454	0.96374	0.0726164	0.0619907	0.104293	0.124296	2.67487	1.46637	4.38812	5.26545	4.68723	6.25571	5.32646	0.878337	1.38797
Dm_00004871-RA	NA	NA	not assigned.unknown	NA	no hits & (original description: transcript offset:49 AED:0.67 eAED:0.67 QI:49|0|0|0.33|0|0|3|0|108)	NA	0.623724	0.156196	0.763211	0.37741	0.605913	0.172148	7.80999	5.62584	5.45224	3.38457	3.68108	3.57023	4.41205	1.01307	1.39361
Dm_00005288-RA		hAT transposon superfamily	not assigned.no ontology	AT1G79740	(at1g79740 : 175.0) hAT transposon superfamily; FUNCTIONS IN: protein dimerization activity, DNA binding; INVOLVED IN: biological_process unknown; LOCATED IN: cellular_component unknown; CONTAINS InterPro DOMAIN/s: HAT dimerisation (InterPro:IPR008906), Zinc finger, BED-type predicted (InterPro:IPR003656), Protein of unknown function DUF659 (InterPro:IPR007021); BEST Arabidopsis thaliana protein …	NA	0.230193	0.195694	0.448136	3.24569	0.727478	0.199687	7.06985	5.16213	5.1826	3.95724	3.27103	4.95572	1.12184	0.898458	1.44353
Dm_00011070-RA		hAT dimerization domain-containing protein / transposase-like protein	DNA.synthesis/chromatin structure.retrotransposon/transposase.hat-like transposase	AT5G33406	(at5g33406 : 358.0) hAT dimerisation domain-containing protein / transposase-related; FUNCTIONS IN: protein dimerization activity; INVOLVED IN: biological_process unknown; LOCATED IN: mitochondrion; CONTAINS InterPro DOMAIN/s: HAT dimerisation (InterPro:IPR008906); BEST Arabidopsis thaliana protein match is: hAT transposon superfamily (TAIR:AT4G15020.2); Has 707 Blast hits to 681 proteins in 26 s…	NA	0.543409	0.826145	0.808275	0.710081	1.09752	0.553207	2.46553	1.57093	2.1203	1.60351	1.16411	2.16823	1.78401	0.903473	1.4581
Dm_00010223-RA	CAM8	calmodulin 8	signalling.calcium	AT4G14640	(at4g14640 : 196.0) encodes a divergent member of calmodulin, which is an EF-hand family of Ca2+-binding proteins. This gene is expressed in leaves, flowers and siliques. The gene functionally complements yeast calmodulin 1 (CAM1). Also the protein does not form formed a complex with a basic amphiphilic helical peptide in the presence of Ca2+ in vitro. Authors suggest that this gene may represent…	NA	1.03325	0.246466	0.427186	0.3974	0.54251	0.835326	1.28483	2.33005	NA	NA	NA	NA	NA	0.906127	1.46595
Dm_00005848-RA	NA	NA	not assigned.unknown	NA	no hits & (original description: transcript offset:0 AED:0.51 eAED:0.51 QI:0|0|0|1|0|0|2|0|83)	NA	0.591323	0.319411	0.0253791	0.411394	0.393909	0.281238	2.32088	2.86532	NA	5.59092	NA	NA	NA	0.906322	1.46653
Dm_00020316-RA	NA	NA	not assigned.unknown	NA	(loc_os08g25640.1 : 93.2) no description available & (reliability: 100.0) & (original description: transcript offset:0 AED:0.49 eAED:0.49 QI:0|-1|0|1|-1|1|1|0|195)	NA	0	0.280819	1.10348	0.69738	0.768725	0.817432	1.69111	2.57832	NA	NA	NA	7.06712	NA	0.907491	1.47002
Dm_00006051-RA	NA	NA	not assigned.unknown	NA	(loc_os05g44786.1 : 166.0) no description available & (reliability: 100.0) & (original description: transcript offset:0 AED:0.49 eAED:0.49 QI:0|-1|0|1|-1|1|1|0|219)	NA	0.370793	0.483813	0.349722	1.1924	0.543496	0.148372	2.50039	2.37316	4.12938	2.67443	2.23225	2.72195	NA	0.907507	1.47006
Dm_00014578-RA	NA	NA	not assigned.unknown	NA	(loc_os12g29700.1 : 94.0) no description available & (reliability: 100.0) & (original description: transcript offset:0 AED:0.76 eAED:0.76 QI:0|0|0|0.12|1|1|8|0|393)	NA	1.85816	0.718111	0.240162	0.328339	0.757173	0.349808	3.89098	2.43025	3.47142	4.08828	2.36277	NA	3.55895	0.907835	1.47105
Dm_00008610-RA	NA	NA	not assigned.unknown	NA	(loc_os09g08590.1 : 204.0) no description available & (reliability: 100.0) & (original description: transcript offset:0 AED:0.33 eAED:0.34 QI:0|0|0|0.33|1|1|3|0|320)	NA	0.944878	0.147005	0.419989	0.333632	0.720009	0.16665	2.81218	4.2438	4.0811	2.75598	1.96641	NA	3.07839	0.918758	1.50472
Dm_00011226-RA	NA	NA	not assigned.unknown	NA	no hits & (original description: transcript offset:0 AED:0.69 eAED:0.74 QI:0|-1|0|1|-1|1|1|0|123)	NA	0.147066	0.182438	0.397306	0.607752	0.812296	0	1.45303	2.98888	6.14528	NA	NA	3.30505	NA	0.925696	1.52717
Dm_00011436-RA	NA	NA	not assigned.unknown	NA	no hits & (original description: transcript offset:0 AED:0.76 eAED:0.78 QI:0|0|0|0.5|1|1|2|0|136)	NA	0.263022	0.908249	1.95925	2.39084	1.71489	0.693914	19.7387	4.44092	4.84682	3.34356	3.52332	6.24961	3.05337	1.15603	1.54257
Dm_00014566-RA	NA	NA	not assigned.unknown	NA	no hits & (original description: transcript offset:0 AED:0.70 eAED:0.70 QI:0|-1|0|1|-1|1|1|0|69)	NA	2.09148	0.184552	0.0699786	0.0705333	0.564698	0.381514	2.8722	3.95004	NA	5.62655	NA	NA	5.71164	0.935526	1.56066
Dm_00018518-RA	NA	NA	not assigned.unknown	NA	no hits & (original description: transcript offset:0 AED:0.88 eAED:1.00 QI:0|-1|0|1|-1|1|1|0|59)	NA	0	0.923284	0.540894	0.184811	0.367141	0	0.840821	NA	NA	NA	NA	NA	NA	0.937226	1.56669
Dm_00008035-RA	GolS2	galactinol synthase 2	minor CHO metabolism.raffinose family.galactinol synthases.known, minor CHO metabolism.raffinose family.galactinol synthases.putative	AT1G56600	(at1g56600 : 317.0) galactinol synthase 2 (GolS2); CONTAINS InterPro DOMAIN/s: Glycosyl transferase, family 8 (InterPro:IPR002495); BEST Arabidopsis thaliana protein match is: galactinol synthase 3 (TAIR:AT1G09350.1); Has 1296 Blast hits to 1295 proteins in 304 species: Archae - 0; Bacteria - 134; Metazoa - 258; Fungi - 290; Plants - 471; Viruses - 73; Other Eukaryotes - 70 (source: NCBI BLink). …	NA	0.0884261	0.409946	0	0.183656	0.128477	0.749313	2.09338	2.36903	NA	7.8113	4.12438	4.43351	3.59081	0.938386	1.57084
Dm_00007328-RA	NA	NA	not assigned.unknown	NA	(loc_os05g44786.1 : 133.0) no description available & (reliability: 100.0) & (original description: transcript offset:0 AED:0.70 eAED:0.70 QI:0|0|0|0.33|0.5|0.66|3|0|262)	NA	0.233848	0.322494	0.452787	1.03345	0.378423	0.0680446	2.00227	2.63566	4.87862	2.01736	2.38251	3.14966	NA	0.938985	1.57299
Dm_00018474-RA	DAYSLEEPER	BED zinc finger and hAT dimerization domain-containing protein DAYSLEEPER	DNA.unspecified	AT3G42170	(gnl|cdd|68872 : 117.0) no description available & (loc_os04g46690.1 : 110.0) no description available & (at3g42170 : 82.0) transposase-like gene with conserved domains from the family of hAT transposases that includes hobo from Drosophila melanogaster, Activator (Ac) from maize, and Tam3 from snapdragon but lacks several amino acids known to be essential for Ac transposition5. The DAYSLEEPER gen…	NA	0.289605	0.354529	0.913423	1.05717	0.438863	0.336919	1.09351	1.62503	1.69973	NA	NA	1.94097	NA	0.943956	1.59129
Dm_00013742-RA	NA	NA	not assigned.unknown	NA	no hits & (original description: transcript offset:0 AED:0.92 eAED:0.92 QI:0|0|0|0.14|1|1|7|0|215)	NA	0.10659	0.294479	0.122492	0.233199	0.60247	0.14816	0.99352	NA	NA	3.0898	NA	3.25587	NA	0.947226	1.60374
Dm_00020558-RA	NA	NA	not assigned.unknown	NA	(loc_os04g22990.1 : 139.0) no description available & (reliability: 100.0) & (original description: transcript offset:0 AED:0.40 eAED:0.59 QI:0|0|0|0.33|0.6|0.5|6|0|529)	NA	0.0609187	0.360199	1.02015	0.460725	0.585313	0.0603303	1.53909	2.0712	4.694	NA	1.38444	4.70428	1.70941	0.947243	1.60381
Dm_00021099-RA		hAT dimerization domain-containing protein / transposase-like protein	DNA.synthesis/chromatin structure.retrotransposon/transposase.hat-like transposase	AT5G33406	(at5g33406 : 176.0) hAT dimerisation domain-containing protein / transposase-related; FUNCTIONS IN: protein dimerization activity; INVOLVED IN: biological_process unknown; LOCATED IN: mitochondrion; CONTAINS InterPro DOMAIN/s: HAT dimerisation (InterPro:IPR008906); BEST Arabidopsis thaliana protein match is: hAT transposon superfamily (TAIR:AT4G15020.2); Has 707 Blast hits to 681 proteins in 26 s…	NA	0.829885	0.231886	0.200414	0.30316	0.424332	0.568131	1.77396	2.93301	1.63449	3.25734	2.09745	NA	2.62771	0.94749	1.60476
Dm_00004300-RA	DAYSLEEPER	BED zinc finger and hAT dimerization domain-containing protein DAYSLEEPER	DNA.unspecified	AT3G42170	(loc_os08g39520.1 : 189.0) no description available & (at3g42170 : 140.0) transposase-like gene with conserved domains from the family of hAT transposases that includes hobo from Drosophila melanogaster, Activator (Ac) from maize, and Tam3 from snapdragon but lacks several amino acids known to be essential for Ac transposition5. The DAYSLEEPER gene lacks 8 bp duplications and TIRs (a common featu…	NA	0.500859	0.510831	0.684879	0.311851	0.546351	0.170833	1.14358	NA	2.79086	NA	NA	NA	1.88471	0.948578	1.60899
Dm_00011937-RA		TTF-type zinc finger protein with HAT dimerization domain-containing protein	DNA.synthesis/chromatin structure.retrotransposon/transposase.hat-like transposase	AT2G06541	(loc_os05g14440.1 : 444.0) no description available & (at2g06541 : 309.0) TTF-type zinc finger protein with HAT dimerisation domain; FUNCTIONS IN: protein dimerization activity; INVOLVED IN: biological_process unknown; LOCATED IN: cellular_component unknown; CONTAINS InterPro DOMAIN/s: HAT dimerisation (InterPro:IPR008906), Zinc finger, TTF-type (InterPro:IPR006580); BEST Arabidopsis thaliana pro…	NA	0.429818	0.49707	0.924616	0.76946	0.715848	0.505497	1.51689	1.60057	1.56914	NA	NA	1.79346	NA	0.948636	1.60922
Dm_00009879-RA		transmembrane protein	not assigned.unknown	AT5G53670	(loc_os03g20930.1 : 194.0) no description available & (at5g53670 : 119.0) unknown protein; FUNCTIONS IN: molecular_function unknown; INVOLVED IN: biological_process unknown; LOCATED IN: endomembrane system; EXPRESSED IN: sperm cell; Has 1807 Blast hits to 1807 proteins in 277 species: Archae - 0; Bacteria - 0; Metazoa - 736; Fungi - 347; Plants - 385; Viruses - 0; Other Eukaryotes - 339 (source: …	NA	0.18581	0.0811095	0.357666	1.44356	0.492196	0.942284	6.34776	6.22344	2.76175	4.2159	3.71067	5.16015	2.16074	1.13686	1.61614
Dm_00006050-RA		PIF1 helicase	DNA.unspecified	AT5G28780	(loc_os04g04390.1 : 200.0) no description available & (at5g28780 : 120.0) PIF1 helicase; CONTAINS InterPro DOMAIN/s: DNA helicase PIF1, ATP-dependent (InterPro:IPR010285); BEST Arabidopsis thaliana protein match is: PIF1 helicase (TAIR:AT3G51690.1); Has 1364 Blast hits to 1355 proteins in 303 species: Archae - 2; Bacteria - 367; Metazoa - 234; Fungi - 111; Plants - 389; Viruses - 9; Other Eukaryo…	NA	0.564603	0.475625	0.577986	1.01501	0.463755	0.249922	1.82409	1.92519	2.80931	1.62434	1.97503	1.69361	NA	0.954341	1.63212
Dm_00006749-RA		nuclease	not assigned.unknown	AT5G41980	(loc_os12g20400.1 : 114.0) no description available & (at5g41980 : 91.7) CONTAINS InterPro DOMAIN/s: Putative harbinger transposase-derived nuclease (InterPro:IPR006912); BEST Arabidopsis thaliana protein match is: unknown protein (TAIR:AT1G43722.1); Has 1807 Blast hits to 1807 proteins in 277 species: Archae - 0; Bacteria - 0; Metazoa - 736; Fungi - 347; Plants - 385; Viruses - 0; Other Eukaryot…	NA	0.258053	0.513222	0.875777	0.416728	0.638706	0.408332	1.38396	1.42715	1.75753	NA	NA	2.44045	1.7445	0.958631	1.65024
Dm_00019441-RA	FAR1	FRS (FAR1 Related Sequences) transcription factor family	signalling.light	AT4G15090	(loc_os02g44790.1 : 87.4) no description available & (at4g15090 : 80.1) Encodes a nuclear localized protein involved in far red light response signaling. Loss of function mutants are defective in far red light responses. Interacts with homologous gene FHY3.; FAR-RED IMPAIRED RESPONSE 1 (FAR1); CONTAINS InterPro DOMAIN/s: MULE transposase, conserved domain (InterPro:IPR018289), Zinc finger, PMZ-ty…	NA	0.0739494	0.154829	0.268184	0.352035	0.486115	0.102385	0.915075	NA	NA	NA	NA	NA	NA	0.959933	1.65591
Dm_00005395-RA		hAT dimerization domain-containing protein / transposase-like protein	DNA.synthesis/chromatin structure.retrotransposon/transposase.hat-like transposase	AT5G33406	(at5g33406 : 239.0) hAT dimerisation domain-containing protein / transposase-related; FUNCTIONS IN: protein dimerization activity; INVOLVED IN: biological_process unknown; LOCATED IN: mitochondrion; CONTAINS InterPro DOMAIN/s: HAT dimerisation (InterPro:IPR008906); BEST Arabidopsis thaliana protein match is: hAT transposon superfamily (TAIR:AT4G15020.2); Has 707 Blast hits to 681 proteins in 26 s…	NA	0.276368	0.456468	0.455604	1.44123	1.22814	0.424303	6.83831	3.90378	4.03203	3.87761	2.49792	4.54196	2.24635	1.16233	1.65977
Dm_00018780-RA	NA	NA	not assigned.unknown	NA	no hits & (original description: transcript offset:0 AED:0.96 eAED:0.96 QI:0|0|0|0.2|1|1|5|0|231)	NA	0.301444	0.290788	0.819444	0.478479	0.331825	0.47884	0.927147	NA	NA	NA	NA	NA	NA	0.961832	1.66434
Dm_00007684-RA		early endosome antigen	not assigned.unknown	AT2G32240	(at2g32240 : 584.0) FUNCTIONS IN: molecular_function unknown; INVOLVED IN: response to cadmium ion; LOCATED IN: plasma membrane; EXPRESSED IN: 25 plant structures; EXPRESSED DURING: 13 growth stages; CONTAINS InterPro DOMAIN/s: Prefoldin (InterPro:IPR009053); BEST Arabidopsis thaliana protein match is: unknown protein (TAIR:AT1G05320.3); Has 470429 Blast hits to 168274 proteins in 4282 species: A…	NA	0.522959	0.874929	1.08748	1.23863	1.45038	0.254737	10.5792	3.5947	5.37153	3.28695	2.86255	4.31717	3.09804	1.24564	1.68604
Dm_00003960-RA	CYP76C2	cytochrome P450, family 76, subfamily C, polypeptide 2	misc.cytochrome P450	AT2G45570	(at2g45570 : 328.0) member of CYP76C; cytochrome P450, family 76, subfamily C, polypeptide 2 (CYP76C2); FUNCTIONS IN: electron carrier activity, monooxygenase activity, iron ion binding, oxygen binding, heme binding; INVOLVED IN: oxidation reduction; EXPRESSED IN: stem, sepal, male gametophyte, carpel, stamen; EXPRESSED DURING: 4 anthesis; CONTAINS InterPro DOMAIN/s: Cytochrome P450 (InterPro:IPR…	NA	0.217054	0.0204401	0.242435	0.208172	0.987583	0.042205	0.812291	5.27493	4.24446	NA	NA	NA	NA	0.972587	1.7164
Dm_00019394-RA		Plant basic secretory protein (BSP) family protein	stress.biotic	AT2G15220	(at2g15220 : 176.0) Plant basic secretory protein (BSP) family protein; INVOLVED IN: defense response; LOCATED IN: endomembrane system; EXPRESSED DURING: seedling growth; CONTAINS InterPro DOMAIN/s: Uncharacterised protein family, basic secretory protein (InterPro:IPR007541); BEST Arabidopsis thaliana protein match is: Plant basic secretory protein (BSP) family protein (TAIR:AT2G15130.1); Has 296…	NA	0.0246147	0.123311	0.125712	0.402294	1.05916	0.105145	1.04485	3.11367	3.23377	2.83359	NA	5.67573	NA	0.973319	1.72027
Dm_00000985-RA	CSR1	chlorsulfuron/imidazolinone resistant 1	amino acid metabolism.synthesis.branched chain group.common.acetolactate synthase	AT3G48560	(p09342|ilv1_tobac : 972.0) Acetolactate synthase 1, chloroplast precursor (EC 2.2.1.6) (Acetolactate synthase I) (Acetohydroxy-acid synthase I) (ALS I) - Nicotiana tabacum (Common tobacco) & (at3g48560 : 929.0) Catalyzes the formation of acetolactate from pyruvate, the first step in valine and isoleucine biosynthesis. Requires FAD, thiamine pyrophosphate and Mg. Inhibited by the sulphonylurea he…	NA	0.832599	0.539766	1.30835	0.652845	0.568948	0.427801	1.89722	1.80423	2.10206	NA	1.73619	1.15746	1.52397	0.975519	1.73221
Dm_00002940-RA	NA	NA	not assigned.unknown	NA	(loc_os06g32850.1 : 80.5) no description available & (reliability: 100.0) & (original description: transcript offset:0 AED:0.53 eAED:0.53 QI:0|0|0|1|0|0|2|0|202)	NA	0.223636	1.29012	0.603202	0.707214	0.591132	0.213235	1.47795	NA	2.74726	NA	NA	2.74356	NA	0.976383	1.73705
Dm_00007746-RA		midasin-like protein	protein.synthesis.ribosome biogenesis	AT1G67120	(at1g67120 : 117.0) ATPases;nucleotide binding;ATP binding;nucleoside-triphosphatases;transcription factor binding; FUNCTIONS IN: nucleoside-triphosphatase activity, ATPase activity, transcription factor binding, nucleotide binding, ATP binding; INVOLVED IN: regulation of transcription, DNA-dependent, regulation of protein complex assembly; LOCATED IN: chloroplast envelope; EXPRESSED IN: 23 plant…	NA	0.681585	0.509656	2.36516	1.61172	0.810031	0.42162	13.0115	4.66086	4.90149	2.46759	4.02009	4.24799	2.99688	1.27326	1.74396
Dm_00008081-RA	DAYSLEEPER	BED zinc finger and hAT dimerization domain-containing protein DAYSLEEPER	DNA.unspecified	AT3G42170	(loc_os07g28760.1 : 187.0) no description available & (at3g42170 : 172.0) transposase-like gene with conserved domains from the family of hAT transposases that includes hobo from Drosophila melanogaster, Activator (Ac) from maize, and Tam3 from snapdragon but lacks several amino acids known to be essential for Ac transposition5. The DAYSLEEPER gene lacks 8 bp duplications and TIRs (a common featu…	NA	0.30826	0.423424	1.22066	0.812689	0.492549	0.250822	1.53207	1.83312	2.54711	NA	1.61492	2.30267	NA	0.979367	1.75444
Dm_00020063-RA	FRS6	FAR1-related sequence 6	signalling.light, DNA.unspecified	AT1G52520	(loc_os11g45530.1 : 170.0) no description available & (at1g52520 : 93.2) FAR1-related sequence 6 (FRS6); FUNCTIONS IN: zinc ion binding; INVOLVED IN: response to red or far red light; LOCATED IN: cellular_component unknown; EXPRESSED IN: 22 plant structures; EXPRESSED DURING: 12 growth stages; CONTAINS InterPro DOMAIN/s: MULE transposase, conserved domain (InterPro:IPR018289), Zinc finger, PMZ-ty…	NA	0.0579935	0.13031	0.0263854	0.0464558	1.36376	0.0766489	0.903098	NA	NA	5.32986	NA	NA	4.49523	0.98059	1.76191
Dm_00016999-RA	TBL2	trichome birefringence-like protein (DUF828)	not assigned.unknown	AT1G60790	(at1g60790 : 526.0) Encodes a member of the TBL (TRICHOME BIREFRINGENCE-LIKE) gene family containing a plant-specific DUF231 (domain of unknown function) domain. TBL gene family has 46 members, two of which (TBR/AT5G06700 and TBL3/AT5G01360) have been shown to be involved in the synthesis and deposition of secondary wall cellulose, presumably by influencing the esterification state of pectic poly…	NA	0.0294776	2.28466	0	0	0.107524	0	1.41061	NA	8.49686	8.75587	3.69055	5.42112	8.83616	0.981438	1.76723
Dm_00012088-RA	EMB1674	EMBRYO DEFECTIVE protein	protein.postranslational modification	AT1G58210	(at1g58210 : 607.0) EMBRYO DEFECTIVE 1674 (EMB1674); CONTAINS InterPro DOMAIN/s: SANT associated (InterPro:IPR015216), KIP1-like (InterPro:IPR011684); BEST Arabidopsis thaliana protein match is: Kinase interacting (KIP1-like) family protein (TAIR:AT1G09720.1); Has 30818 Blast hits to 19641 proteins in 1442 species: Archae - 565; Bacteria - 3414; Metazoa - 15518; Fungi - 2982; Plants - 1779; Virus…	NA	0.381389	0.604052	0.413598	1.02332	0.288892	0.3	1.57411	1.3721	2.36985	1.91725	2.41729	2.0109	NA	0.981972	1.77064
Dm_00009009-RA		PIF1 helicase	not assigned.no ontology	AT5G28780	(loc_os01g43980.1 : 115.0) no description available & (ipr010285 : 109.607796) DNA helicase PIF1, ATP-dependent & (at5g28780 : 92.4) PIF1 helicase; CONTAINS InterPro DOMAIN/s: DNA helicase PIF1, ATP-dependent (InterPro:IPR010285); BEST Arabidopsis thaliana protein match is: PIF1 helicase (TAIR:AT3G51690.1); Has 1364 Blast hits to 1355 proteins in 303 species: Archae - 2; Bacteria - 367; Metazoa -…	NA	0.381664	0.811924	1.3285	0.185391	0.777174	0.397466	1.71559	NA	2.09301	NA	NA	2.16614	3.22176	0.988305	1.81561
Dm_00007376-RA	SIR	sulfite reductase	S-assimilation.sulfite redox	AT5G04590	(at5g04590 : 955.0) A.thaliana gene encoding sulfite reductase.; sulfite reductase (SIR); FUNCTIONS IN: sulfite reductase activity, sulfite reductase (ferredoxin) activity, copper ion binding; INVOLVED IN: sulfate reduction, response to salt stress, response to cold; LOCATED IN: in 7 components; EXPRESSED IN: 25 plant structures; EXPRESSED DURING: 15 growth stages; CONTAINS InterPro DOMAIN/s: Sul…	NA	1.12828	0.215704	0.585002	0.403724	0.40762	0.225289	1.3767	2.6677	2.64506	1.22846	1.737	NA	1.74748	0.989512	1.82546
Dm_00000139-RA	NA	NA	not assigned.unknown	NA	(q10710|sta_ricco : 81.6) Sugar carrier protein A - Ricinus communis (Castor bean) & (reliability: 100.0) & (original description: transcript offset:0 AED:0.41 eAED:0.41 QI:0|0|0|0.33|1|1|3|0|88)	NA	0.340819	0.202922	0.0472974	0.208919	0.14784	0.950096	0.762174	NA	NA	NA	NA	NA	NA	0.990031	1.82986
Dm_00003941-RA	NA	NA	not assigned.unknown	NA	no hits & (original description: transcript offset:0 AED:0.54 eAED:0.54 QI:0|0|0|0.5|1|1|2|0|60)	NA	0.37516	0.179778	0.88248	0.774755	0.478508	0.163814	4.19332	4.54275	4.80332	NA	3.13716	3.50446	NA	1.25141	1.83613
Dm_00017258-RA	NA	NA	not assigned.unknown	NA	(loc_os08g34850.1 : 84.7) no description available & (reliability: 100.0) & (original description: transcript offset:0 AED:0.42 eAED:0.42 QI:0|-1|0|1|-1|1|1|0|73)	NA	0	0.0261874	0.826846	0.370357	0.318642	0	0.868269	NA	NA	NA	NA	NA	NA	0.99368	1.86468
Dm_00012355-RA		PIF1 helicase	not assigned.no ontology	AT5G28780	(loc_os01g14770.1 : 283.0) no description available & (at5g28780 : 150.0) PIF1 helicase; CONTAINS InterPro DOMAIN/s: DNA helicase PIF1, ATP-dependent (InterPro:IPR010285); BEST Arabidopsis thaliana protein match is: PIF1 helicase (TAIR:AT3G51690.1); Has 1364 Blast hits to 1355 proteins in 303 species: Archae - 2; Bacteria - 367; Metazoa - 234; Fungi - 111; Plants - 389; Viruses - 9; Other Eukaryo…	NA	0.128156	0.173198	1.20881	0.44276	0.675341	0.0102176	1.06954	2.6062	6.35443	NA	NA	3.03281	NA	0.993965	1.86778
Dm_00007326-RA	NA	NA	not assigned.unknown	NA	no hits & (original description: transcript offset:0 AED:0.85 eAED:0.85 QI:0|0|0|0.33|1|1|3|0|62)	NA	0.128356	0.0372451	0.212143	0.671556	0.684333	0.0677086	0.602696	NA	NA	NA	NA	NA	NA	0.99423	1.87072
Dm_00016720-RA	NA	NA	not assigned.unknown	NA	no hits & (original description: transcript offset:0 AED:0.61 eAED:0.61 QI:0|0|0|0.5|1|1|2|0|64)	NA	0.405824	0.277902	0.623093	1.10821	0.510678	0.249965	0.648842	NA	NA	NA	NA	NA	NA	0.994519	1.87402
Dm_00019739-RA	NA	NA	not assigned.unknown	NA	(loc_os11g40920.1 : 157.0) no description available & (ipr010285 : 147.94527) DNA helicase PIF1, ATP-dependent & (reliability: 100.0) & (original description: transcript offset:0 AED:0.14 eAED:0.14 QI:0|0|0|0.5|1|0|2|0|175)	NA	0.071141	0.417133	0.223117	1.22654	0.48176	0.146147	0.845399	NA	NA	NA	NA	3.50355	NA	0.995608	1.88727
Dm_00007327-RA		PIF1 helicase	DNA.unspecified	AT5G28780	(loc_os05g44786.1 : 416.0) no description available & (ipr010285 : 286.0482) DNA helicase PIF1, ATP-dependent & (at5g28780 : 162.0) PIF1 helicase; CONTAINS InterPro DOMAIN/s: DNA helicase PIF1, ATP-dependent (InterPro:IPR010285); BEST Arabidopsis thaliana protein match is: PIF1 helicase (TAIR:AT3G51690.1); Has 1364 Blast hits to 1355 proteins in 303 species: Archae - 2; Bacteria - 367; Metazoa - …	NA	0.917221	0.842565	0.777447	1.58478	0.72717	0.658126	1.82874	1.12017	1.46103	1.27388	1.34129	0.994279	NA	0.996312	1.89672
Dm_00017626-RA		Pentatricopeptide repeat (PPR) superfamily protein	DNA.synthesis/chromatin structure	AT1G62910	(at1g62910 : 127.0) Pentatricopeptide repeat (PPR) superfamily protein; CONTAINS InterPro DOMAIN/s: Pentatricopeptide repeat (InterPro:IPR002885); BEST Arabidopsis thaliana protein match is: Tetratricopeptide repeat (TPR)-like superfamily protein (TAIR:AT1G63150.1); Has 124657 Blast hits to 15540 proteins in 305 species: Archae - 10; Bacteria - 122; Metazoa - 2303; Fungi - 2464; Plants - 114740; …	NA	0.0939456	0.21529	0.297787	0.934258	0.280032	0.687385	0.873957	2.00499	NA	NA	NA	3.28433	NA	0.996597	1.90079
Dm_00005130-RA		PLC-like phosphodiesterases superfamily protein	signalling.MAP kinases	AT1G49740	(at1g49740 : 185.0) PLC-like phosphodiesterases superfamily protein; FUNCTIONS IN: phospholipase C activity, phosphoric diester hydrolase activity; INVOLVED IN: intracellular signaling pathway, lipid metabolic process; LOCATED IN: endomembrane system; EXPRESSED IN: 22 plant structures; EXPRESSED DURING: 13 growth stages; CONTAINS InterPro DOMAIN/s: Phospholipase C, phosphatidylinositol-specific ,…	NA	0.256264	0.220044	0.402632	0.784774	0.530067	0.937712	0.872943	2.0291	NA	NA	NA	NA	NA	0.996853	1.9046
Dm_00012237-RA	NA	NA	not assigned.unknown	NA	(loc_os10g31990.1 : 83.6) no description available & (reliability: 100.0) & (original description: transcript offset:0 AED:0.57 eAED:0.60 QI:0|-1|0|1|-1|1|1|0|135)	NA	0.728411	0.75706	0.534058	1.31875	0.800431	0.238796	4.32881	2.50266	4.05649	3.09881	2.45186	2.57539	1.69088	1.28617	1.91426
Dm_00013008-RA	SCPL49	SERINE CARBOXYPEPTIDASE-LIKE 49	protein.degradation.serine protease	AT3G10410	(at3g10410 : 499.0) SERINE CARBOXYPEPTIDASE-LIKE 49 (SCPL49); FUNCTIONS IN: serine-type carboxypeptidase activity; INVOLVED IN: proteolysis; LOCATED IN: vacuole; EXPRESSED IN: 25 plant structures; EXPRESSED DURING: 15 growth stages; CONTAINS InterPro DOMAIN/s: Peptidase S10, serine carboxypeptidase (InterPro:IPR001563), Peptidase S10, serine carboxypeptidase, active site (InterPro:IPR018202); BES…	NA	0.140696	0.0597235	0.159802	1.43721	0.851527	3.59697	5.91058	6.64355	NA	5.22787	2.7973	5.4891	NA	1.26621	1.92761
Dm_00016131-RA	FAR1	FRS (FAR1 Related Sequences) transcription factor family	signalling.light	AT4G15090	(loc_os11g45530.1 : 127.0) no description available & (at4g15090 : 91.7) Encodes a nuclear localized protein involved in far red light response signaling. Loss of function mutants are defective in far red light responses. Interacts with homologous gene FHY3.; FAR-RED IMPAIRED RESPONSE 1 (FAR1); CONTAINS InterPro DOMAIN/s: MULE transposase, conserved domain (InterPro:IPR018289), Zinc finger, PMZ-t…	NA	0	0.292462	0.302488	1.53278	0.157029	0.110426	1.0883	NA	3.47412	NA	2.86622	5.9238	NA	0.998963	1.94529
Dm_00006764-RA	NA	NA	not assigned.unknown	NA	(loc_os11g22240.1 : 85.1) no description available & (reliability: 100.0) & (original description: transcript offset:0 AED:0.41 eAED:0.42 QI:0|0|0|0.37|1|1|8|0|296)	NA	0.994918	0.346865	0.728369	0.454963	0.439332	0.473782	0.986945	NA	NA	NA	NA	NA	NA	0.999813	1.97674
Dm_00019519-RA		PIF1 helicase	DNA.unspecified	AT5G28780	(loc_os10g11620.1 : 120.0) no description available & (at5g28780 : 89.7) PIF1 helicase; CONTAINS InterPro DOMAIN/s: DNA helicase PIF1, ATP-dependent (InterPro:IPR010285); BEST Arabidopsis thaliana protein match is: PIF1 helicase (TAIR:AT3G51690.1); Has 1364 Blast hits to 1355 proteins in 303 species: Archae - 2; Bacteria - 367; Metazoa - 234; Fungi - 111; Plants - 389; Viruses - 9; Other Eukaryot…	NA	0.0227514	0.806182	0.916545	0.571944	0.573468	1.07636	0.809681	NA	NA	NA	NA	5.44268	NA	0.999843	1.97874
Dm_00012676-RA	NA	NA	not assigned.unknown	NA	no hits & (original description: transcript offset:0 AED:0.81 eAED:0.81 QI:0|0|0|0.5|1|1|2|0|113)	NA	0.534383	0.287004	1.05672	0.391051	0.36635	0.186642	1.17093	NA	NA	NA	NA	NA	NA	0.999949	1.98789
Dm_00013447-RA		Integrase-type DNA-binding superfamily protein	RNA.regulation of transcription.AP2/EREBP, APETALA2/Ethylene-responsive element binding protein family	AT1G75490	(at1g75490 : 143.0) encodes a member of the DREB subfamily A-2 of ERF/AP2 transcription factor family. The protein contains one AP2 domain. There are eight members in this subfamily including DREB2A AND DREB2B that are involved in response to drought.; Integrase-type DNA-binding superfamily protein; CONTAINS InterPro DOMAIN/s: DNA-binding, integrase-type (InterPro:IPR016177), Pathogenesis-related…	NA	0.496911	1.03528	0.246377	0.381428	0.583022	0.788633	0.918425	NA	NA	1.83113	NA	NA	NA	0.999868	2.01955
Dm_00010429-RA		5'-3' exonuclease family protein	DNA.synthesis/chromatin structure	AT1G29630	(at1g29630 : 106.0) 5-3 exonuclease family protein; FUNCTIONS IN: DNA binding, catalytic activity, nuclease activity; INVOLVED IN: DNA repair; EXPRESSED IN: 10 plant structures; EXPRESSED DURING: 4 anthesis, F mature embryo stage, petal differentiation and expansion stage, E expanded cotyledon stage, D bilateral stage; CONTAINS InterPro DOMAIN/s: DNA repair protein (XPGC)/yeast Rad (InterPro:IPR0…	NA	0.358303	1.07779	0.257997	0.51395	0.484393	0.027543	0.860759	NA	4.62107	NA	NA	NA	NA	0.999696	2.02964
Dm_00003283-RA	ATM	Serine/Threonine-kinase ATM-like protein	protein.postranslational modification.kinase	AT3G48190	(at3g48190 : 117.0) encodes a homolog of the human ATM gene, which is mutated in ataxia telangiectasia, a chromosome instability disorder. Characterization of mutants suggest a role in repairing DNA in response to ionizing radiation as well as during meiosis. The protein has kinase domains and shows kinase activity in orthologs. There is also evidence that ATM might be involved in the telomerase-…	NA	0.444113	0.55537	0.834913	1.13559	0.786054	0.411609	6.30615	3.50701	3.94893	2.91627	3.02906	3.74166	2.44744	1.44865	2.03589
Dm_00019450-RA	NA	NA	not assigned.unknown	NA	no hits & (original description: transcript offset:0 AED:0.32 eAED:0.32 QI:0|0|0|0.25|1|1|4|0|214)	NA	0.0165309	0.355694	0.188024	0.607747	0.3474	1.30766	0.721566	NA	NA	NA	NA	4.96536	NA	0.999069	2.05184
Dm_00014690-RA	MYB92	myb domain protein 92	RNA.regulation of transcription.MYB domain transcription factor family	AT5G10280	(at5g10280 : 271.0) Encodes a putative transcription factor (MYB92).; myb domain protein 92 (MYB92); CONTAINS InterPro DOMAIN/s: SANT, DNA-binding (InterPro:IPR001005), Homeodomain-like (InterPro:IPR009057), Myb, DNA-binding (InterPro:IPR014778), HTH transcriptional regulator, Myb-type, DNA-binding (InterPro:IPR017930), Homeodomain-related (InterPro:IPR012287), Myb transcription factor (InterPro:…	NA	0.073358	0.131337	1.00907	0.770559	0.282875	0.0229664	0.534981	NA	4.31305	NA	NA	2.74794	NA	0.998876	2.05697
Dm_00000475-RA	CalS7	glucan synthase-like 7	minor CHO metabolism.callose	AT1G06490	(at1g06490 : 412.0) encodes a gene similar to callose synthase; glucan synthase-like 7 (GSL07); FUNCTIONS IN: transferase activity, transferring glycosyl groups, 1,3-beta-glucan synthase activity; INVOLVED IN: 1,3-beta-glucan biosynthetic process; LOCATED IN: 1,3-beta-glucan synthase complex, membrane; EXPRESSED IN: 20 plant structures; EXPRESSED DURING: 13 growth stages; CONTAINS InterPro DOMAIN…	NA	0.92415	1.50068	0.767706	0.829139	0.546882	0.0686036	4.08936	1.43994	5.89066	2.37535	2.89506	2.15052	2.29989	1.35115	2.06723
Dm_00010879-RA	FAR1	FRS (FAR1 Related Sequences) transcription factor family	signalling.light	AT4G15090	(loc_os11g45530.1 : 229.0) no description available & (at4g15090 : 186.0) Encodes a nuclear localized protein involved in far red light response signaling. Loss of function mutants are defective in far red light responses. Interacts with homologous gene FHY3.; FAR-RED IMPAIRED RESPONSE 1 (FAR1); CONTAINS InterPro DOMAIN/s: MULE transposase, conserved domain (InterPro:IPR018289), Zinc finger, PMZ-…	NA	0.683993	0.973017	1.87294	2.21436	2.24151	0.27048	15.7556	4.01452	5.85787	3.05994	2.82029	4.46695	2.82893	1.52565	2.08073
Dm_00010683-RA	NA	NA	not assigned.unknown	NA	no hits & (original description: transcript offset:0 AED:0.07 eAED:0.12 QI:0|0|0|1|0|0|2|0|222)	NA	0.48097	0.300464	0.9689	0.288088	0.84125	0.536526	0.468923	NA	NA	NA	NA	NA	NA	0.997453	2.08581
Dm_00009751-RA		Insulinase (Peptidase family M16) family protein	protein.degradation.metalloprotease	AT2G41790	(loc_os07g38270.1 : 204.0) no description available & (at2g41790 : 192.0) Insulinase (Peptidase family M16) family protein; FUNCTIONS IN: metalloendopeptidase activity, zinc ion binding, catalytic activity, metal ion binding; INVOLVED IN: proteolysis; LOCATED IN: cellular_component unknown; EXPRESSED IN: 23 plant structures; EXPRESSED DURING: 13 growth stages; CONTAINS InterPro DOMAIN/s: Peptidas…	NA	0.124102	1.04918	0.555517	1.90669	0.737186	0.235553	4.40822	2.05949	4.27774	2.93387	2.59318	5.16834	1.17953	1.34843	2.08874
Dm_00013249-RA	NA	NA	not assigned.unknown	NA	(loc_os09g01570.1 : 80.5) no description available & (reliability: 100.0) & (original description: transcript offset:0 AED:0.31 eAED:0.61 QI:0|0|0|0.4|0.25|0|5|0|395)	NA	1.1023	0.0802955	0.567341	0.0470423	0.295086	0.255795	0.828	3.31412	1.66693	NA	1.52469	NA	3.98788	0.99673	2.09725
Dm_00004635-RA	Kin3	Protein kinase superfamily protein	protein.postranslational modification.kinase.receptor like cytoplasmatic kinase VII	AT2G17220	(loc_os06g51170.1 : 292.0) no description available & (at2g17220 : 271.0) Protein kinase superfamily protein; FUNCTIONS IN: protein serine/threonine kinase activity, protein kinase activity, kinase activity, ATP binding; INVOLVED IN: protein amino acid phosphorylation; LOCATED IN: chloroplast; EXPRESSED IN: 22 plant structures; EXPRESSED DURING: 13 growth stages; CONTAINS InterPro DOMAIN/s: Prote…	NA	0.121125	0.171478	0.562559	0.214642	1.68319	0.392494	1.00798	2.52809	NA	NA	NA	2.95857	2.2701	0.99545	2.11478
Dm_00014121-RA	NA	NA	not assigned.unknown	NA	no hits & (original description: transcript offset:0 AED:0.46 eAED:0.90 QI:0|0|0|0.66|0.5|0|3|0|103)	NA	0.502074	1.92087	0.315587	0.674729	0.405243	0.388209	1.62197	NA	NA	2.27251	NA	NA	NA	0.994859	2.12202
Dm_00005178-RA	NA	NA	not assigned.unknown	NA	(loc_os01g51650.1 : 82.0) no description available & (reliability: 100.0) & (original description: transcript offset:0 AED:0.41 eAED:0.41 QI:0|0|0|0.33|1|1|3|0|265)	NA	0.327955	0.356665	0.766032	0.881242	1.19811	0.0603688	3.27538	3.19274	5.62653	2.17317	1.44225	3.36895	1.86831	1.37544	2.12209
Dm_00018659-RA		hAT dimerization domain-containing protein / transposase-like protein	DNA.synthesis/chromatin structure.retrotransposon/transposase.hat-like transposase	AT5G33406	(at5g33406 : 341.0) hAT dimerisation domain-containing protein / transposase-related; FUNCTIONS IN: protein dimerization activity; INVOLVED IN: biological_process unknown; LOCATED IN: mitochondrion; CONTAINS InterPro DOMAIN/s: HAT dimerisation (InterPro:IPR008906); BEST Arabidopsis thaliana protein match is: hAT transposon superfamily (TAIR:AT4G15020.2); Has 707 Blast hits to 681 proteins in 26 s…	NA	0.170699	0.489297	0.955391	0.908291	0.843921	0.124862	3.43931	2.8027	4.76863	1.8684	2.01852	4.17816	1.93924	1.37853	2.12746
Dm_00005396-RA	NA	NA	not assigned.unknown	NA	no hits & (original description: transcript offset:0 AED:0.67 eAED:0.67 QI:0|0|0|0.5|0|0.5|2|0|207)	NA	0.260583	0.507307	0.722456	1.37415	1.35492	0.399582	7.06935	3.79188	4.12828	3.34073	2.40459	4.62137	2.37457	1.50448	2.14592
Dm_00017640-RA		ferredoxin-fold anticodon-binding domain protein	not assigned.unknown	AT1G55790	(loc_os09g30200.1 : 146.0) no description available & (at1g55790 : 144.0) FUNCTIONS IN: metal ion binding; INVOLVED IN: metal ion transport; CONTAINS InterPro DOMAIN/s: Heavy metal transport/detoxification protein (InterPro:IPR006121); BEST Arabidopsis thaliana protein match is: Copper transport protein family (TAIR:AT3G20180.1). & (ipr019446 : 105.27706) Domain of unknown function DUF2431 & (rel…	NA	0.123786	0.67577	0.172722	0.741656	0.032346	1.76655	0.599929	NA	NA	NA	4.03186	NA	NA	0.99117	2.16015
Dm_00006903-RA		hAT dimerization domain-containing protein / transposase-like protein	DNA.synthesis/chromatin structure.retrotransposon/transposase.hat-like transposase	AT5G33406	(at5g33406 : 206.0) hAT dimerisation domain-containing protein / transposase-related; FUNCTIONS IN: protein dimerization activity; INVOLVED IN: biological_process unknown; LOCATED IN: mitochondrion; CONTAINS InterPro DOMAIN/s: HAT dimerisation (InterPro:IPR008906); BEST Arabidopsis thaliana protein match is: hAT transposon superfamily (TAIR:AT4G15020.2); Has 707 Blast hits to 681 proteins in 26 s…	NA	0.344754	0.798576	1.1234	0.906901	0.926688	0.75366	6.07849	2.92783	2.99152	2.49073	2.72943	4.17592	2.71847	1.51551	2.16285
Dm_00000781-RA	PAP20	Purple acid phosphatases superfamily protein	misc.acid and other phosphatases	AT3G52780	(at3g52780 : 519.0) PAP20; FUNCTIONS IN: protein serine/threonine phosphatase activity, acid phosphatase activity; INVOLVED IN: biological_process unknown; LOCATED IN: endomembrane system; EXPRESSED IN: 10 plant structures; EXPRESSED DURING: 4 anthesis, petal differentiation and expansion stage; CONTAINS InterPro DOMAIN/s: Metallophosphoesterase (InterPro:IPR004843), Purple acid phosphatase-like,…	NA	0.54129	1.39551	0	0.74841	0.172726	0.917274	0.684946	NA	NA	8.15234	1.99044	NA	NA	0.99075	2.16393
Dm_00006166-RA	NA	NA	not assigned.unknown	NA	no hits & (original description: transcript offset:0 AED:0.49 eAED:0.49 QI:0|0|0|0.16|1|1|6|0|177)	NA	0.0399729	1.74018	0.437275	0.256367	0.430897	0.308017	1.23074	NA	2.04755	NA	NA	4.66255	2.40366	0.988842	2.18019
Dm_00008360-RA		Integrase-type DNA-binding superfamily protein	RNA.regulation of transcription.AP2/EREBP, APETALA2/Ethylene-responsive element binding protein family	AT1G19210	(at1g19210 : 164.0) encodes a member of the DREB subfamily A-5 of ERF/AP2 transcription factor family. The protein contains one AP2 domain. There are 15 members in this subfamily including RAP2.1, RAP2.9 and RAP2.10.; Integrase-type DNA-binding superfamily protein; FUNCTIONS IN: DNA binding, sequence-specific DNA binding transcription factor activity; INVOLVED IN: regulation of transcription, DNA…	NA	0.0550032	0.103735	0.40034	4.03922	1.96228	2.27467	13.8778	7.06173	2.61356	5.14417	2.82957	7.78508	1.78101	1.5173	2.19209
Dm_00007646-RA	NA	NA	not assigned.unknown	NA	no hits & (original description: transcript offset:0 AED:0.59 eAED:0.75 QI:0|0|0|1|0|0|2|0|119)	NA	0.191953	0.401988	1.36981	0.735721	0.766899	0.0352768	3.61661	3.18021	6.4914	NA	2.2404	4.57794	2.24015	1.39964	2.20499
Dm_00016513-RA	MED31	SOH1 family protein	RNA.regulation of transcription.unclassified	AT5G19910	(at5g19910 : 137.0) MED31; FUNCTIONS IN: RNA polymerase II transcription mediator activity; INVOLVED IN: regulation of transcription; LOCATED IN: mediator complex; EXPRESSED IN: 22 plant structures; EXPRESSED DURING: 12 growth stages; CONTAINS InterPro DOMAIN/s: Mediator complex, subunit Med31 (InterPro:IPR008831). & (loc_os10g41450.1 : 122.0) no description available & (reliability: 274.0) & (or…	NA	1.24767	0.942692	0.268742	0.0550068	0.63951	0.799648	3.03112	1.66643	1.91073	3.5265	2.24805	NA	5.38008	1.42054	2.24303
Dm_00019409-RA	NA	NA	not assigned.unknown	NA	no hits & (original description: transcript offset:0 AED:0.31 eAED:0.31 QI:0|-1|0|1|-1|1|1|0|93)	NA	0.235073	0.517195	1.12363	0.787576	1.27631	0.0413145	4.25646	3.02799	6.33486	NA	NA	4.15077	2.43321	1.4213	2.24325
Dm_00013814-RA		BTB/POZ domain with WD40/YVTN repeat-like protein	transport.potassium	AT4G30940	(at4g30940 : 151.0) BTB/POZ domain with WD40/YVTN repeat-like protein; FUNCTIONS IN: voltage-gated potassium channel activity; INVOLVED IN: potassium ion transport; LOCATED IN: voltage-gated potassium channel complex, membrane; EXPRESSED IN: leaf whorl, male gametophyte, flower, pollen tube; EXPRESSED DURING: L mature pollen stage, M germinated pollen stage, 4 anthesis; CONTAINS InterPro DOMAIN/s…	NA	0.0800292	0.668151	0.329908	0.524936	0.758019	2.39261	0.861313	NA	NA	NA	NA	3.42157	NA	0.978008	2.25408
Dm_00010088-RA	REN1	Rho GTPase activation protein (RhoGAP) with PH domain-containing protein	signalling.G-proteins, signalling.unspecified	AT4G24580	(at4g24580 : 423.0) Encodes a Rho GTPase-activating protein that interacts with ROP1 (a Rho GTPase) and regulates pollen tube development. This protein can be observed at the apical tip of growing pollen tubes and on endocytic vesicles traveling to this region of the pollen tube.; ROP1 ENHANCER 1 (REN1); CONTAINS InterPro DOMAIN/s: Pleckstrin homology-type (InterPro:IPR011993), Rho GTPase activat…	NA	2.0197	0.844855	0.316245	0.376403	0.614765	0.216218	1.41208	NA	2.76829	2.08847	1.1885	NA	1.88392	0.977267	2.2584
Dm_00004792-RA		DNAse I-like superfamily protein	not assigned.unknown	AT1G40390	(at1g40390 : 82.4) DNAse I-like superfamily protein; CONTAINS InterPro DOMAIN/s: Endonuclease/exonuclease/phosphatase (InterPro:IPR005135), RNA-directed DNA polymerase (reverse transcriptase), related (InterPro:IPR015706); BEST Arabidopsis thaliana protein match is: DNAse I-like superfamily protein (TAIR:AT1G43760.1); Has 796 Blast hits to 793 proteins in 14 species: Archae - 0; Bacteria - 0; Met…	NA	0	1.93459	0.314503	0	0.58023	0.0162898	0.81912	-1.26102	5.72235	NA	NA	7.56707	7.90344	0.976972	2.2601
Dm_00020501-RA	NA	NA	not assigned.unknown	NA	(loc_os01g27550.1 : 83.6) no description available & (reliability: 100.0) & (original description: transcript offset:0 AED:0.28 eAED:0.28 QI:0|0|0|0.25|1|1|4|0|248)	NA	0.0999296	0.174683	0.343901	0.35385	0.278934	1.90285	1.14533	2.69256	NA	1.61307	1.97471	3.65749	1.63085	0.974392	2.27458
Dm_00008248-RA	NA	NA	not assigned.unknown	NA	no hits & (original description: transcript offset:0 AED:0.25 eAED:0.25 QI:0|-1|0|1|-1|1|1|0|65)	NA	0.0680071	0.765357	0.515732	0.323738	1.15654	0	3.01041	NA	6.30428	2.72254	NA	5.34541	3.0831	1.43251	2.27773
Dm_00006318-RA	RLP6	receptor like protein 6	stress.biotic, stress.biotic.PR-proteins, signalling.receptor kinases.leucine rich repeat VII	AT1G45616	(at1g45616 : 89.7) receptor like protein 6 (RLP6); INVOLVED IN: signal transduction, defense response; LOCATED IN: membrane; EXPRESSED IN: leaf; CONTAINS InterPro DOMAIN/s: Leucine-rich repeat-containing N-terminal domain, type 2 (InterPro:IPR013210), Leucine-rich repeat (InterPro:IPR001611); BEST Arabidopsis thaliana protein match is: receptor like protein 7 (TAIR:AT1G47890.1); Has 122755 Blast …	NA	1.57405	0.219909	0.422047	0.261153	0.419077	0.241104	0.643254	NA	NA	NA	NA	NA	NA	0.973551	2.27915
Dm_00002100-RA	NA	NA	not assigned.unknown	NA	no hits & (original description: transcript offset:0 AED:0.68 eAED:0.68 QI:0|0|0|1|1|1|2|0|60)	NA	0.43412	0.289208	0.306177	1.31323	1.07464	0	4.07991	3.81559	6.62769	3.60728	1.93217	3.21579	NA	1.43491	2.28185
Dm_00018304-RA	FOLB2	Dihydroneopterin aldolase	C1-metabolism.dihydroneopterin aldolase	AT5G62980	(loc_os09g38759.1 : 103.0) no description available & (at5g62980 : 98.6) Encodes an enzyme that can act as a aldolase or an epimerase for 7,8-dihydroneopterin and 7,8-dihydromonapterin in vitro. It is likely to act in folate biosynthesis as a homooctamer in vivo.; FOLB2; FUNCTIONS IN: dihydroneopterin aldolase activity; INVOLVED IN: folic acid and derivative metabolic process; LOCATED IN: cellula…	NA	0.127513	1.65223	0.44002	0.353554	0.276088	0.48903	0.589992	NA	NA	NA	NA	NA	NA	0.97239	2.28536
Dm_00015521-RA		TTF-type zinc finger protein with HAT dimerization domain-containing protein	DNA.unspecified	AT4G10200	(loc_os02g14150.1 : 356.0) no description available & (at4g10200 : 335.0) TTF-type zinc finger protein with HAT dimerisation domain; FUNCTIONS IN: protein dimerization activity; INVOLVED IN: biological_process unknown; LOCATED IN: cellular_component unknown; CONTAINS InterPro DOMAIN/s: HAT dimerisation (InterPro:IPR008906), Zinc finger, TTF-type (InterPro:IPR006580); BEST Arabidopsis thaliana pro…	NA	1.22031	0.313244	1.24716	0.576472	0.58989	0.706774	1.37505	2.1351	NA	NA	NA	NA	NA	1.43646	2.28638
Dm_00014535-RA	NA	NA	not assigned.unknown	NA	no hits & (original description: transcript offset:0 AED:0.22 eAED:0.22 QI:0|0|0|1|1|1|3|0|126)	NA	0.403208	0.272565	0.522178	0.822532	0.816417	0.261035	3.08788	3.49657	3.62594	2.48905	NA	2.90513	NA	1.4385	2.29362
Dm_00008129-RA		hAT transposon superfamily protein	not assigned.unknown	AT5G31412	(at5g31412 : 100.0) hAT transposon superfamily protein; FUNCTIONS IN: protein dimerization activity; INVOLVED IN: biological_process unknown; LOCATED IN: cellular_component unknown; CONTAINS InterPro DOMAIN/s: HAT dimerisation (InterPro:IPR008906), Protein of unknown function DUF659 (InterPro:IPR007021); BEST Arabidopsis thaliana protein match is: hAT transposon superfamily protein (TAIR:AT1G4326…	NA	0.654393	0.802547	2.56203	0.92668	1.39556	0.403812	7.49085	3.22217	4.30592	1.54302	2.42127	3.53667	2.99734	1.56444	2.30282
Dm_00010369-RA	NA	NA	not assigned.unknown	NA	no hits & (original description: transcript offset:0 AED:0.25 eAED:0.25 QI:0|-1|0|1|-1|1|1|0|63)	NA	0.308789	0.531943	0.990647	0.700425	1.20545	0.126966	6.19326	3.51014	5.47178	2.57969	2.34268	4.18105	3.06123	1.59091	2.31282
Dm_00012399-RA		hAT dimerization domain-containing protein	DNA.synthesis/chromatin structure.retrotransposon/transposase.hat-like transposase, RNA.regulation of transcription.putative transcription regulator, DNA.unspecified	AT3G17450	(loc_os12g35120.1 : 276.0) no description available & (at3g17450 : 187.0) hAT dimerisation domain-containing protein; FUNCTIONS IN: protein dimerization activity, DNA binding; INVOLVED IN: biological_process unknown; LOCATED IN: cellular_component unknown; EXPRESSED IN: 22 plant structures; EXPRESSED DURING: 14 growth stages; CONTAINS InterPro DOMAIN/s: HAT dimerisation (InterPro:IPR008906), Zinc…	NA	1.34614	0.674921	0.42743	0.462243	0.548645	0.744641	2.98891	2.14641	2.02929	2.76492	2.45357	NA	2.69148	1.44484	2.31651
Dm_00001182-RA	CKX1	cytokinin oxidase/dehydrogenase 1	hormone metabolism.cytokinin.synthesis-degradation	AT2G41510	(at2g41510 : 589.0) It encodes a protein whose sequence is similar to cytokinin oxidase/dehydrogenase, which catalyzes the degradation of cytokinins.; cytokinin oxidase/dehydrogenase 1 (CKX1); FUNCTIONS IN: cytokinin dehydrogenase activity; INVOLVED IN: N-terminal protein myristoylation, cytokinin catabolic process, meristem development; LOCATED IN: vacuole; EXPRESSED IN: lateral root, shoot apex…	NA	0.960568	2.86845	0.734563	2.28399	2.41888	0.536254	14.7763	2.36702	4.83398	4.31711	2.60885	3.95697	2.70565	1.66137	2.32667
Dm_00016097-RA	CRU2	cruciferin 2	development.storage proteins	AT1G03880	(p09800|legb_goshi : 365.0) Legumin B precursor (Beta-globulin B) (LEGB-C134) [Contains: Legumin B acidic chain; Legumin B basic chain] - Gossypium hirsutum (Upland cotton) & (loc_os01g55690.1 : 338.0) no description available & (at1g03880 : 319.0) Protein is tyrosine-phosphorylated and its phosphorylation state is modulated in response to ABA in Arabidopsis thaliana seeds.; cruciferin 2 (CRU2); …	NA	0.538576	0.687002	0.0805434	0.264425	1.49425	1.53669	3.57559	2.38717	1.21841	5.3468	1.2681	2.76354	3.65878	1.45381	2.33952
Dm_00002614-RA	RCI3	Peroxidase superfamily protein	stress.abiotic.cold, misc.peroxidases, misc.glutathione S transferases	AT1G05260	(loc_os05g04490.1 : 289.0) no description available & (at1g05260 : 236.0) Encodes a cold-inducible cationic peroxidase that is involved in the stress response. In response to low temperature, RCI3 transcripts accumulate in the aerial part and in roots of etiolated seedlings but only in roots of light-grown seedlings.; RARE COLD INDUCIBLE GENE 3 (RCI3); FUNCTIONS IN: peroxidase activity; INVOLVED …	NA	0.434012	0.209831	0.708286	4.41623	1.54529	8.7282	19.7173	6.55	NA	4.80394	3.68433	5.5282	2.16026	1.54353	2.34677
Dm_00010022-RA	ROF1	rotamase FKBP 1	protein.folding, cell.cycle.peptidylprolyl isomerase	AT3G25230	(at3g25230 : 170.0) Encodes a a high molecular weight member of the FK506 binding protein (FKBP) family. It has three FKBP12-like domains, tetratricopeptide repeats, and a putative calmodulin binding domain. Modulates thermotolerance by interacting with HSP90.1 and affecting the accumulation of HsfA2-regulated sHSPs.; rotamase FKBP 1 (ROF1); CONTAINS InterPro DOMAIN/s: Tetratricopeptide TPR-1 (In…	NA	0.592743	0.390471	0.364024	1.03418	0.417198	1.79509	1.51347	NA	NA	NA	NA	NA	NA	1.45247	2.3551
Dm_00007745-RA		midasin-like protein	protein.synthesis.ribosome biogenesis	AT1G67120	(at1g67120 : 134.0) ATPases;nucleotide binding;ATP binding;nucleoside-triphosphatases;transcription factor binding; FUNCTIONS IN: nucleoside-triphosphatase activity, ATPase activity, transcription factor binding, nucleotide binding, ATP binding; INVOLVED IN: regulation of transcription, DNA-dependent, regulation of protein complex assembly; LOCATED IN: chloroplast envelope; EXPRESSED IN: 23 plant…	NA	1.03534	0.475374	1.81784	1.50497	0.888057	0.234409	6.50302	3.76734	4.84537	1.81547	2.85742	2.63127	2.10624	1.60644	2.35754
Dm_00003248-RA		Glycosyltransferase family 29 (sialyltransferase) family protein	protein.glycosylation	AT3G48820	(at3g48820 : 661.0) Encodes a homolog of the animal sialyltransferases but sialyltransferase activity was not detected (Plant Biology 2009, 11:284). Located in the Golgi apparatus.; Glycosyltransferase family 29 (sialyltransferase) family protein; FUNCTIONS IN: transferase activity, transferring glycosyl groups, sialyltransferase activity; INVOLVED IN: protein amino acid glycosylation; LOCATED IN…	NA	0.76343	1.22186	0.901717	0.770499	0.983893	0.695394	2.64237	1.10652	1.92217	1.55615	1.42694	1.78114	1.72228	1.45846	2.35771
Dm_00007963-RA		Ankyrin repeat family protein	cell.organisation	AT4G03460	(at4g03460 : 155.0) Ankyrin repeat family protein; CONTAINS InterPro DOMAIN/s: Ankyrin repeat-containing domain (InterPro:IPR020683), Ankyrin repeat (InterPro:IPR002110); BEST Arabidopsis thaliana protein match is: Ankyrin repeat family protein (TAIR:AT4G03500.1); Has 31827 Blast hits to 15474 proteins in 712 species: Archae - 44; Bacteria - 2495; Metazoa - 17236; Fungi - 2457; Plants - 2857; Vir…	NA	0.231689	0.757113	2.46493	0.896813	1.46991	0.278956	4.42525	2.53929	3.93573	NA	1.59797	4.18433	2.29343	1.44624	2.364
Dm_00020272-RA	NA	NA	not assigned.unknown	NA	(loc_os05g41040.1 : 208.0) no description available & (reliability: 100.0) & (original description: transcript offset:0 AED:0.38 eAED:0.38 QI:0|0|0|0.33|1|1|3|0|303)	NA	0.801895	0.566955	1.65708	0.434289	0.899171	0.262593	2.98421	2.37552	3.56016	NA	1.73188	1.91862	2.7433	1.4488	2.36915
Dm_00004650-RA	CYP76C7	cytochrome P450, family 76, subfamily C, polypeptide 7	misc.cytochrome P450	AT3G61040	(at3g61040 : 409.0) encodes a protein with cytochrome P450 domain; cytochrome P450, family 76, subfamily C, polypeptide 7 (CYP76C7); FUNCTIONS IN: electron carrier activity, monooxygenase activity, iron ion binding, oxygen binding, heme binding; INVOLVED IN: oxidation reduction; LOCATED IN: endomembrane system; CONTAINS InterPro DOMAIN/s: Cytochrome P450 (InterPro:IPR001128), Cytochrome P450, E-c…	NA	4.92076	0.938608	0.183548	0.294923	1.20123	0.467894	4.27611	2.19238	3.20075	4.61947	1.83823	NA	3.82813	1.35989	2.37116
Dm_00005890-RA	GALK	Mevalonate/galactokinase family protein	minor CHO metabolism.galactose.galactokinases	AT3G06580	(at3g06580 : 231.0) Encodes a protein with galactose kinase activity. The gene was shown to complement the yeast Æ’gal1 mutant defective in the galactokinase gene GAL1.; GALK; FUNCTIONS IN: ATP binding, galactokinase activity; INVOLVED IN: galactose metabolic process, carbohydrate phosphorylation; LOCATED IN: cytoplasm; EXPRESSED IN: 26 plant structures; EXPRESSED DURING: 15 growth stages; CONTAI…	NA	1.19163	0.854374	0.88533	0.839096	1.26775	0.556467	5.42244	2.65974	3.29347	2.5783	2.1076	2.18307	2.66974	1.61926	2.37816
Dm_00007048-RA		Galactosyltransferase family protein	protein.glycosylation	AT5G57500	(at5g57500 : 410.0) Galactosyltransferase family protein; FUNCTIONS IN: transferase activity, transferring glycosyl groups; INVOLVED IN: protein amino acid glycosylation; LOCATED IN: endomembrane system, membrane; EXPRESSED IN: 17 plant structures; EXPRESSED DURING: 10 growth stages; CONTAINS InterPro DOMAIN/s: Glycosyl transferase, family 31 (InterPro:IPR002659); BEST Arabidopsis thaliana protei…	NA	0	0.0647508	0.108849	0.793356	0.236851	3.16303	1.29813	4.31025	NA	3.54378	2.48132	7.42128	NA	0.950641	2.3852
Dm_00007144-RA		TTF-type zinc finger protein with HAT dimerization domain-containing protein	DNA.synthesis/chromatin structure.retrotransposon/transposase.hat-like transposase, DNA.unspecified	AT1G19260	(at1g19260 : 226.0) TTF-type zinc finger protein with HAT dimerisation domain; FUNCTIONS IN: protein dimerization activity; INVOLVED IN: biological_process unknown; LOCATED IN: cellular_component unknown; CONTAINS InterPro DOMAIN/s: HAT dimerisation (InterPro:IPR008906), Zinc finger, TTF-type (InterPro:IPR006580); BEST Arabidopsis thaliana protein match is: unknown protein (TAIR:AT4G09660.1); Has…	NA	0.203106	0.699953	1.47415	0.663648	1.02919	0.327457	3.22066	2.20002	3.33224	1.13989	1.67232	3.90578	2.25204	1.46788	2.38563
Dm_00021046-RA		Ribosomal protein L19e family protein	protein.synthesis.ribosomal protein.eukaryotic.60S subunit.L19	AT3G16780	(at3g16780 : 92.8) Ribosomal protein L19e family protein; FUNCTIONS IN: structural constituent of ribosome; INVOLVED IN: translation, ribosome biogenesis; LOCATED IN: ribosome, cytosolic large ribosomal subunit, plasma membrane; EXPRESSED IN: 23 plant structures; EXPRESSED DURING: 13 growth stages; CONTAINS InterPro DOMAIN/s: Ribosomal protein L19/L19e (InterPro:IPR000196), Ribosomal protein L19/…	NA	0.0563252	0.533347	2.97003	0.162835	0.544084	0.0830996	1.30972	NA	4.081	NA	NA	4.52418	2.92236	0.950384	2.38625
Dm_00013475-RA	NA	NA	not assigned.unknown	NA	no hits & (original description: transcript offset:0 AED:0.85 eAED:0.85 QI:0|-1|0|1|-1|1|1|0|60)	NA	0.691463	0.726927	1.91804	0.455595	0.702811	0.133314	5.57737	2.94729	5.25353	NA	2.90006	2.95554	3.36806	1.61186	2.38929
Dm_00006347-RA	NA	NA	not assigned.unknown	NA	no hits & (original description: transcript offset:0 AED:0.67 eAED:0.68 QI:0|0|0|0.4|0.5|0.6|5|0|251)	NA	0.251452	0.244912	0.109009	2.11499	0.989948	0.148324	1.58159	2.69759	3.3491	3.74853	NA	2.62103	NA	1.45139	2.4102
Dm_00016888-RA		P-loop containing nucleoside triphosphate hydrolases superfamily protein	stress.biotic	AT1G33970	(at1g33970 : 149.0) P-loop containing nucleoside triphosphate hydrolases superfamily protein; FUNCTIONS IN: GTP binding; INVOLVED IN: response to bacterium; LOCATED IN: cellular_component unknown; EXPRESSED IN: 22 plant structures; EXPRESSED DURING: 13 growth stages; CONTAINS InterPro DOMAIN/s: AIG1 (InterPro:IPR006703); BEST Arabidopsis thaliana protein match is: P-loop containing nucleoside tri…	NA	1.07988	1.89223	0.313161	0.284789	0.330037	0.6725	3.28893	NA	2.29514	3.45004	3.35039	1.61611	3.48706	1.4655	2.42059
Dm_00004000-RA		thyroid adenoma-associated-like protein	not assigned.unknown	AT3G55160	(at3g55160 : 1157.0) unknown protein; EXPRESSED IN: 11 plant structures; EXPRESSED DURING: 4 anthesis, F mature embryo stage, petal differentiation and expansion stage, E expanded cotyledon stage, D bilateral stage; CONTAINS InterPro DOMAIN/s: Protein of unknown function DUF2428, death-receptor-like (InterPro:IPR019442); Has 357 Blast hits to 330 proteins in 163 species: Archae - 0; Bacteria - 0;…	NA	0.672585	1.41483	1.34578	1.97147	1.43572	0.556552	9.79374	2.78946	4.11729	2.86407	2.76916	3.86318	2.31456	1.72831	2.43298
Dm_00011950-RA	NA	NA	not assigned.unknown	NA	no hits & (original description: transcript offset:0 AED:0.76 eAED:0.76 QI:0|0|0|0.5|1|1|2|0|122)	NA	0.398617	0.736904	0.788177	1.27165	1.14685	0.353411	5.22677	2.82333	3.96194	2.68688	2.19406	3.6222	2.00588	1.64724	2.43504
Dm_00001542-RA		ARM repeat superfamily protein	not assigned.unknown	AT4G30990	(loc_os01g40250.1 : 164.0) no description available & (at4g30990 : 149.0) ARM repeat superfamily protein; FUNCTIONS IN: binding; INVOLVED IN: biological_process unknown; LOCATED IN: Golgi apparatus; CONTAINS InterPro DOMAIN/s: Down-regulated-in-metastasis protein (InterPro:IPR011430), Armadillo-type fold (InterPro:IPR016024); BEST Arabidopsis thaliana protein match is: unknown protein (TAIR:AT5G3…	NA	0.394388	1.02166	2.44379	2.29816	1.79372	0.253602	12.1383	3.56931	5.57482	2.32891	2.75649	4.93328	2.37759	1.72953	2.44441
Dm_00008769-RA	NA	NA	not assigned.unknown	NA	(loc_os11g14280.1 : 84.7) no description available & (reliability: 100.0) & (original description: transcript offset:0 AED:0.50 eAED:0.50 QI:0|0|0|0.5|0.33|0.5|4|0|137)	NA	0.224027	0.279585	0.761098	0.886617	1.12395	0.500352	4.78272	4.11165	3.20776	2.66716	2.09938	4.39313	2.39268	1.6647	2.48082
Dm_00014716-RA		PHD finger transcription factor	RNA.regulation of transcription.PHD finger transcription factor	AT5G58610	(at5g58610 : 563.0) PHD finger transcription factor, putative; FUNCTIONS IN: RNA binding, DNA binding, zinc ion binding; INVOLVED IN: N-terminal protein myristoylation, regulation of transcription, DNA-dependent, response to chitin; LOCATED IN: endomembrane system, nucleus; EXPRESSED IN: 7 plant structures; EXPRESSED DURING: 4 anthesis, F mature embryo stage, petal differentiation and expansion s…	NA	0.431705	0.238837	0.0278684	2.19601	0.190428	0.372504	0.939351	1.96274	1.31637	5.02358	2.30382	1.08291	-1.23434	0.924653	2.48178
Dm_00016132-RA	FRS5	FAR1-related sequence 5	signalling.light	AT4G38180	(loc_os11g45530.1 : 359.0) no description available & (at4g38180 : 231.0) FAR1-related sequence 5 (FRS5); FUNCTIONS IN: zinc ion binding; INVOLVED IN: response to red or far red light; LOCATED IN: cellular_component unknown; EXPRESSED IN: 22 plant structures; EXPRESSED DURING: 13 growth stages; CONTAINS InterPro DOMAIN/s: MULE transposase, conserved domain (InterPro:IPR018289), Transcription fact…	NA	0	0.547955	0.68667	2.37707	0.372429	0.0585273	0.795416	NA	3.72881	NA	NA	7.37479	-1.57974	0.923307	2.48638
Dm_00007300-RA	NA	NA	not assigned.unknown	NA	(loc_os03g41840.1 : 108.0) no description available & (reliability: 100.0) & (original description: transcript offset:0 AED:0.48 eAED:0.48 QI:0|0|0|0.66|1|1|3|0|321)	NA	0.140034	0.595537	1.8236	0.776691	1.2127	0.143371	3.19189	2.42479	4.40001	NA	1.39646	4.53842	2.03629	1.49409	2.49699
Dm_00004063-RA	CYP710A1	cytochrome P450, family 710, subfamily A, polypeptide 1	misc.cytochrome P450	AT2G34500	(loc_os01g11340.1 : 677.0) no description available & (at2g34500 : 664.0) Encodes a protein with C22-sterol desaturase activity. The enzyme was shown to catalyze in the presence of NADPH the conversion of &beta;-sitosterol to stigmasterol, but not that of 24-<i>epi</i>-campesterol to brassicasterol (unlike CYP710A2).; cytochrome P450, family 710, subfamily A, polypeptide 1 (CYP710A1); FUNCTIONS I…	NA	10.0694	0.336943	0.993408	1.09081	2.43658	0.742891	17.6256	5.69601	4.57325	4.19826	2.85762	0.805791	3.97972	1.63716	2.52307
Dm_00015854-RA		nuclease	not assigned.unknown	AT5G12010	(at5g12010 : 622.0) unknown protein; INVOLVED IN: response to salt stress; LOCATED IN: chloroplast, plasma membrane, membrane; EXPRESSED IN: 23 plant structures; EXPRESSED DURING: 13 growth stages; BEST Arabidopsis thaliana protein match is: unknown protein (TAIR:AT4G29780.1); Has 1807 Blast hits to 1807 proteins in 277 species: Archae - 0; Bacteria - 0; Metazoa - 736; Fungi - 347; Plants - 385; …	NA	3.32239	0.637114	0.879453	1.98632	1.79236	2.76223	17.3357	4.7776	2.65165	4.31674	3.26614	2.37534	3.12524	1.82103	2.52513
Dm_00003284-RA	ATM	Serine/Threonine-kinase ATM-like protein	protein.postranslational modification.kinase	AT3G48190	(at3g48190 : 259.0) encodes a homolog of the human ATM gene, which is mutated in ataxia telangiectasia, a chromosome instability disorder. Characterization of mutants suggest a role in repairing DNA in response to ionizing radiation as well as during meiosis. The protein has kinase domains and shows kinase activity in orthologs. There is also evidence that ATM might be involved in the telomerase-…	NA	0.830169	0.927622	1.83193	2.64927	1.15247	0.990295	15.4987	4.04924	3.97737	3.10162	3.73866	4.21655	2.54372	1.86493	2.52637
Dm_00020402-RA	NA	NA	not assigned.unknown	NA	(loc_os11g03330.1 : 140.0) no description available & (reliability: 100.0) & (original description: transcript offset:0 AED:0.21 eAED:0.21 QI:0|0|0|0.33|1|1|3|0|281)	NA	0.394	0.409935	1.13127	0.702684	1.24734	0.399647	1.77271	2.12885	2.20118	NA	NA	2.18397	NA	1.50785	2.53153
Dm_00015306-RA	FAR1	FRS (FAR1 Related Sequences) transcription factor family	signalling.light	AT4G15090	(loc_os11g45530.1 : 309.0) no description available & (at4g15090 : 230.0) Encodes a nuclear localized protein involved in far red light response signaling. Loss of function mutants are defective in far red light responses. Interacts with homologous gene FHY3.; FAR-RED IMPAIRED RESPONSE 1 (FAR1); CONTAINS InterPro DOMAIN/s: MULE transposase, conserved domain (InterPro:IPR018289), Zinc finger, PMZ-…	NA	0.360875	0.969615	0.796078	1.20326	0.882253	0.333833	1.83548	NA	2.43177	NA	NA	2.39937	NA	1.51021	2.54148
Dm_00015826-RA		Major facilitator superfamily protein	transport.peptides and oligopeptides	AT1G59740	(at1g59740 : 778.0) Major facilitator superfamily protein; FUNCTIONS IN: transporter activity; INVOLVED IN: oligopeptide transport, response to nematode; LOCATED IN: plasma membrane, membrane; EXPRESSED IN: 19 plant structures; EXPRESSED DURING: 10 growth stages; CONTAINS InterPro DOMAIN/s: PTR2 family proton/oligopeptide symporter, conserved site (InterPro:IPR018456), Oligopeptide transporter (I…	Plant permeome.carrier-mediated transport.MFS superfamily.NRT1/PTR family.NPF4-type unspecified transporter.	1.44541	2.95958	0.490928	0.0427217	0.159691	0	1.52649	NA	8.54725	NA	3.2504	NA	5.12651	1.47973	2.56258
Dm_00006562-RA	NA	NA	not assigned.unknown	NA	no hits & (original description: transcript offset:0 AED:0.62 eAED:0.63 QI:0|0|0|0.66|1|1|3|0|78)	NA	0.66178	1.93601	4.19102	3.7321	2.74267	0.411492	17.1232	3.13557	5.4227	2.02241	2.63991	4.66527	2.19722	1.8066	2.60232
Dm_00005821-RA	TBL27	TRICHOME BIREFRINGENCE-LIKE 27	not assigned.unknown	AT1G70230	(at1g70230 : 446.0) Encodes a member of the TBL (TRICHOME BIREFRINGENCE-LIKE) gene family containing a plant-specific DUF231 (domain of unknown function) domain. TBL gene family has 46 members, two of which (TBR/AT5G06700 and TBL3/AT5G01360) have been shown to be involved in the synthesis and deposition of secondary wall cellulose, presumably by influencing the esterification state of pectic poly…	NA	24.4345	1.0806	0.0999089	0.880837	1.06196	1.85819	22.7431	4.39183	3.62309	7.68075	4.40991	NA	4.67057	1.44384	2.61654
Dm_00011990-RA		P-loop containing nucleoside triphosphate hydrolases superfamily protein	RNA.processing.ribonucleases	AT1G16800	(at1g16800 : 218.0) P-loop containing nucleoside triphosphate hydrolases superfamily protein; BEST Arabidopsis thaliana protein match is: P-loop containing nucleoside triphosphate hydrolases superfamily protein (TAIR:AT4G30100.1); Has 9771 Blast hits to 8579 proteins in 1344 species: Archae - 197; Bacteria - 2032; Metazoa - 2727; Fungi - 1277; Plants - 815; Viruses - 364; Other Eukaryotes - 2359 …	NA	0.724	1.69287	2.10952	2.44404	2.18606	1.78512	15.4879	3.18552	3.12463	2.84454	2.82223	4.43773	2.64836	1.88724	2.61818
Dm_00014171-RA	NA	NA	not assigned.unknown	NA	no hits & (original description: transcript offset:0 AED:0.59 eAED:0.64 QI:0|0|0|1|0|0|2|0|134)	NA	0.685197	0.998236	1.03692	1.0356	1.92842	0.660339	7.38035	2.86047	3.41742	2.84282	1.92671	3.36323	2.84706	1.82263	2.62701
Dm_00006620-RA		Leucine-rich receptor-like protein kinase family protein	signalling.receptor kinases.leucine rich repeat XI	AT1G34110	(at1g34110 : 1289.0) Leucine-rich receptor-like protein kinase family protein; FUNCTIONS IN: protein serine/threonine kinase activity, protein kinase activity, ATP binding; INVOLVED IN: transmembrane receptor protein tyrosine kinase signaling pathway, protein amino acid phosphorylation; LOCATED IN: endomembrane system; EXPRESSED IN: 13 plant structures; EXPRESSED DURING: 4 anthesis, F mature embr…	NA	3.10111	0.742651	0.444572	0.564962	0.66765	0.219519	1.30971	0.821876	2.59931	1.53954	0.967498	-1.23524	1.22549	0.877508	2.6293
Dm_00005891-RA	NA	NA	not assigned.unknown	NA	no hits & (original description: transcript offset:0 AED:0.47 eAED:0.69 QI:0|0|0|1|1|0.5|2|0|67)	NA	0.387653	0.351056	0.6362	0.881922	0.762389	0.168086	1.11361	NA	NA	NA	NA	NA	NA	1.53386	2.64975
Dm_00010619-RA	DAYSLEEPER	BED zinc finger and hAT dimerization domain-containing protein DAYSLEEPER	DNA.unspecified	AT3G42170	(loc_os11g39940.1 : 345.0) no description available & (p08770|tra1_maize : 220.0) Putative AC transposase (ORFA) - Zea mays (Maize) & (at3g42170 : 155.0) transposase-like gene with conserved domains from the family of hAT transposases that includes hobo from Drosophila melanogaster, Activator (Ac) from maize, and Tam3 from snapdragon but lacks several amino acids known to be essential for Ac tran…	NA	0.506164	1.22195	0.605739	0.45401	1.09853	0.206951	2.02007	NA	3.31552	1.70393	0.866639	1.99548	2.13117	1.53619	2.6608
Dm_00009870-RA	NA	NA	not assigned.unknown	NA	no hits & (original description: transcript offset:0 AED:0.04 eAED:0.04 QI:0|-1|0|1|-1|1|1|0|165)	NA	3.71312	0.0347578	0.260512	0.186149	0.264518	0.048478	0.809903	4.43048	3.9749	NA	NA	-2.15127	NA	0.865457	2.66387
Dm_00018757-RA		sodium/calcium exchanger family protein / calcium-binding EF hand family protein	signalling.calcium	AT1G53210	(at1g53210 : 149.0) sodium/calcium exchanger family protein / calcium-binding EF hand family protein; FUNCTIONS IN: calcium ion binding; INVOLVED IN: transmembrane transport; LOCATED IN: vacuolar membrane, plasma membrane, vacuole, membrane, plant-type vacuole; EXPRESSED IN: 27 plant structures; EXPRESSED DURING: 16 growth stages; CONTAINS InterPro DOMAIN/s: EF-Hand 1, calcium-binding site (Inter…	Plant permeome.carrier-mediated transport.CDF superfamily.CaCA family.NCL/EF-CAX cation exchanger.	4.14461	34.557	9.65787	215.083	31.9471	33.976	372.539	3.43053	3.45305	5.26999	3.54529	6.49038	0.792092	1.76496	2.67884
Dm_00008622-RA	NA	NA	not assigned.unknown	NA	no hits & (original description: transcript offset:0 AED:0.68 eAED:0.83 QI:0|0|0|1|0|0.5|2|0|103)	NA	0	0.823099	0.947817	0.426534	0.446758	0	0.890748	NA	5.16319	NA	NA	5.16611	NA	1.54215	2.69596
Dm_00009561-RA		MUS308 and mammalian DNA polymerase-like protein	DNA.synthesis/chromatin structure	AT4G32700	(at4g32700 : 155.0) Encodes a homolog of Drosophila MUS308 and mammalian DNA polymerase, which prevent spontaneous or DNA damage-induced production of DNA double strand breaks. Two conserved functional domains: an N-terminal superfamily II DNA/RNA helicase domain and a C-terminal prokaryotic-type DNA polymerase I domain. Required for regulated cell division and differentiation in meristems. Mutan…	NA	0.518621	1.05599	1.5584	1.61695	1.16749	0.620748	6.97031	2.71605	3.47659	2.1538	2.57169	3.7422	2.10103	1.86139	2.69791
Dm_00012157-RA	MSH7	MUTS homolog 7	DNA.repair	AT3G24495	(at3g24495 : 173.0) encodes a DNA mismatch repair homolog of human MutS gene, MSH6. There are four MutS genes in Arabidopsis, MSH2, MSH3, MSH6, and MSH7, which all act as heterodimers and bind to 51-mer duplexes. MSH2*MSH7 exhibit moderate affinity for a (T/G) substrate and weak binding of (+T), suggesting MSH2*MSH7 may be specialized for lesions/base mispairs not tested or for (T/G) mispairs in …	NA	0.894858	1.777	0.539661	0.605292	0.57591	0.518427	2.31437	NA	2.15364	2.07209	1.98458	1.35039	1.88594	1.52858	2.70495
Dm_00006204-RA	FRS5	FAR1-related sequence 5	signalling.light	AT4G38180	(loc_os11g45530.1 : 393.0) no description available & (at4g38180 : 254.0) FAR1-related sequence 5 (FRS5); FUNCTIONS IN: zinc ion binding; INVOLVED IN: response to red or far red light; LOCATED IN: cellular_component unknown; EXPRESSED IN: 22 plant structures; EXPRESSED DURING: 13 growth stages; CONTAINS InterPro DOMAIN/s: MULE transposase, conserved domain (InterPro:IPR018289), Transcription fact…	NA	0.43596	0.696969	1.24311	1.17067	1.24213	0.195795	3.93627	2.49163	4.42129	1.66249	1.65177	3.19633	1.74403	1.76196	2.70965
Dm_00009685-RA	NA	NA	not assigned.unknown	NA	no hits & (original description: transcript offset:0 AED:0.47 eAED:0.47 QI:0|0|0|1|0|0|3|0|189)	NA	1.56667	1.65375	2.04063	1.43882	3.96312	0.612195	14.3661	3.11451	4.59192	2.78462	1.86168	3.19454	3.29629	1.9217	2.72263
Dm_00007603-RA	NA	NA	not assigned.unknown	NA	no hits & (original description: transcript offset:0 AED:0.56 eAED:0.60 QI:0|0|0|0.5|0|0.5|2|0|66)	NA	0.414202	0.763033	2.0599	1.75894	1.67714	0.713002	8.69803	3.47708	3.56582	2.09713	2.42411	4.42861	2.35645	1.86939	2.72426
Dm_00011750-RA	NA	NA	not assigned.unknown	NA	(loc_os11g44830.1 : 187.0) no description available & (reliability: 100.0) & (original description: transcript offset:0 AED:0.72 eAED:0.73 QI:0|0|0|0.33|1|1|3|0|469)	NA	0.419976	0.814737	1.52083	0.873941	1.55412	0.203184	2.42399	1.55874	3.48887	NA	NA	2.45154	1.45462	1.54901	2.73078
Dm_00003698-RA	ATCSLA09	Nucleotide-diphospho-sugar transferases superfamily protein	cell wall.cellulose synthesis.cellulose synthase, cell wall.cellulose synthesis	AT5G03760	(at5g03760 : 737.0) encodes a beta-mannan synthase that is required for agrobacterium-mediated plant genetic transformation involves a complex interaction between the bacterium and the host plant. 3 UTR is involved in transcriptional regulation and the gene is expressed in the elongation zone of the root.; ATCSLA09; CONTAINS InterPro DOMAIN/s: Glycosyl transferase, family 2 (InterPro:IPR001173); …	NA	2.86645	51.6053	0.697022	5.52471	24.6124	1.84442	86.8873	0.751233	5.57458	6.95713	1.81841	4.93405	3.97694	1.74577	2.74216
Dm_00016976-RA	NA	NA	not assigned.unknown	NA	no hits & (original description: transcript offset:0 AED:0.19 eAED:0.19 QI:0|0|0|0.5|1|1|2|0|87)	NA	4.32161	3.65896	0.19171	0.241873	0.450884	1.208	9.31168	NA	3.01743	5.58293	4.50388	NA	5.12456	1.74534	2.76218
Dm_00013233-RA	NA	NA	not assigned.unknown	NA	no hits & (original description: transcript offset:0 AED:0.69 eAED:0.69 QI:0|0|0|0.5|1|1|2|0|107)	NA	0.589855	0.465938	0.0583482	13.8147	0.896656	0.117699	4.90074	3.39301	5.30833	5.72973	2.45637	3.01262	-1.49836	0.829534	2.76269
Dm_00013459-RA		GDSL-like Lipase/Acylhydrolase superfamily protein	misc.GDSL-motif lipase	AT2G42990	(at2g42990 : 415.0) GDSL-like Lipase/Acylhydrolase superfamily protein; FUNCTIONS IN: hydrolase activity, acting on ester bonds, carboxylesterase activity; INVOLVED IN: lipid metabolic process; LOCATED IN: endomembrane system; EXPRESSED IN: 13 plant structures; EXPRESSED DURING: 7 growth stages; CONTAINS InterPro DOMAIN/s: Lipase, GDSL (InterPro:IPR001087); BEST Arabidopsis thaliana protein match…	NA	0.23762	0.552115	0.756463	0.919283	1.75586	0.842373	1.64863	1.57901	NA	NA	NA	2.87472	NA	1.53272	2.76879
Dm_00006474-RA		RmlC-like cupins superfamily protein	not assigned.no ontology	AT2G18540	(at2g18540 : 325.0) RmlC-like cupins superfamily protein; FUNCTIONS IN: nutrient reservoir activity; INVOLVED IN: biological_process unknown; LOCATED IN: endomembrane system; CONTAINS InterPro DOMAIN/s: Cupin, RmlC-type (InterPro:IPR011051), Cupin 1 (InterPro:IPR006045), RmlC-like jelly roll fold (InterPro:IPR014710); BEST Arabidopsis thaliana protein match is: RmlC-like cupins superfamily protei…	NA	0.746986	4.48624	0.543143	0.355767	0.644323	0.0841528	1.35429	-1.71972	4.10211	1.30981	1.06097	0.856616	1.92628	0.826087	2.77193
Dm_00010151-RA	NA	NA	not assigned.unknown	NA	no hits & (original description: transcript offset:0 AED:0.93 eAED:0.93 QI:0|0|0|0.2|1|1|5|0|323)	NA	0.398771	0.947347	1.22103	1.55087	1.01808	0.338808	5.83832	2.61768	4.14256	2.24826	2.5053	3.88218	1.90629	1.89591	2.77248
Dm_00012501-RA		Pentatricopeptide repeat (PPR) superfamily protein	not assigned.no ontology.pentatricopeptide (PPR) repeat-containing protein	AT5G61800	(at5g61800 : 455.0) Pentatricopeptide repeat (PPR) superfamily protein; CONTAINS InterPro DOMAIN/s: Pentatricopeptide repeat (InterPro:IPR002885); BEST Arabidopsis thaliana protein match is: Pentatricopeptide repeat (PPR-like) superfamily protein (TAIR:AT4G18840.1); Has 1807 Blast hits to 1807 proteins in 277 species: Archae - 0; Bacteria - 0; Metazoa - 736; Fungi - 347; Plants - 385; Viruses - 0…	NA	1.27371	0.710603	0.76895	0.56591	0.971135	0.500364	0.934912	NA	NA	NA	NA	NA	NA	1.55544	2.78566
Dm_00014806-RA		Sec14p-like phosphatidylinositol transfer family protein	protein.targeting.secretory pathway.unspecified	AT1G01630	(at1g01630 : 286.0) Sec14p-like phosphatidylinositol transfer family protein; CONTAINS InterPro DOMAIN/s: Cellular retinaldehyde-binding/triple function, C-terminal (InterPro:IPR001251), Cellular retinaldehyde-binding/triple function, N-terminal (InterPro:IPR008273), Phosphatidylinositol transfer protein-like, N-terminal (InterPro:IPR011074); BEST Arabidopsis thaliana protein match is: Sec14p-lik…	NA	0.0178244	0.11667	0.0851535	0.85233	0.325099	7.61982	4.60306	5.3408	NA	5.80501	3.83134	7.90125	2.44479	1.27006	2.79253
Dm_00021061-RA	SGR4	Vesicle transport v-SNARE family protein	cell.vesicle transport	AT5G39510	(loc_os01g51120.2 : 94.0) no description available & (at5g39510 : 82.4) Encodes a member of SNARE gene family. Homologous with yeast VTI1 and is involved in vesicle transport. Mutant alleles such as sgr4/zig are defective in the shoots response to gravity resulting in a zigzag growth pattern of the stem. Involved in protein trafficking to lytic vacuoles. Can conditionally substitute VTI12 in prot…	NA	0	0.326748	0.194637	0	1.38927	1.1448	0.911299	NA	NA	NA	NA	NA	NA	1.55875	2.79374
Dm_00009382-RA	ABCB11	P-glycoprotein 11	transport.ABC transporters and multidrug resistance systems	AT1G02520	(at1g02520 : 1681.0) P-glycoprotein 11 (PGP11); FUNCTIONS IN: ATPase activity, coupled to transmembrane movement of substances; INVOLVED IN: transport, transmembrane transport; LOCATED IN: plasma membrane; EXPRESSED IN: callus; CONTAINS InterPro DOMAIN/s: ATPase, AAA+ type, core (InterPro:IPR003593), ABC transporter-like (InterPro:IPR003439), ABC transporter, transmembrane domain, type 1 (InterPr…	Plant permeome.primary active transport.ABC superfamily.ABC-B group.MDR subfamily B transporter.	0.536255	2.14647	0.375185	42.495	1.08778	103.673	111.715	5.701	NA	8.26662	6.67713	7.68231	1.39456	1.56931	2.79419
Dm_00010553-RA	CUC2	NAC (No Apical Meristem) domain transcriptional regulator superfamily protein	RNA.regulation of transcription.NAC domain transcription factor family, development.unspecified	AT5G53950	(at5g53950 : 303.0) Transcriptional activator of the NAC gene family, with CUC1 redundantly required for embryonic apical meristem formation, cotyledon separation and expression of STM. Proper timing of CUC2 expression is required to maintain the phyllotactic pattern initiated in the meristem. CUC2 expression in leaf sinus region is required for serration and the extent of serration is modulated …	NA	0.663641	9.80151	0.0392392	0.454655	0.154865	0.88404	3.33815	-1.54264	1.93892	6.98073	4.37651	2.33863	2.88615	0.817637	2.79444
Dm_00006621-RA		hAT dimerization domain-containing protein	RNA.regulation of transcription.putative transcription regulator	AT3G17450	(loc_os08g19870.1 : 298.0) no description available & (at3g17450 : 129.0) hAT dimerisation domain-containing protein; FUNCTIONS IN: protein dimerization activity, DNA binding; INVOLVED IN: biological_process unknown; LOCATED IN: cellular_component unknown; EXPRESSED IN: 22 plant structures; EXPRESSED DURING: 14 growth stages; CONTAINS InterPro DOMAIN/s: HAT dimerisation (InterPro:IPR008906), Zinc…	NA	0.455887	0.835406	1.34097	1.29233	1.09692	0.597444	3.82193	2.19224	2.70934	1.50525	1.81117	3.08214	1.56692	1.79337	2.7963
Dm_00001410-RA	HB40	homeobox protein 40	RNA.regulation of transcription.HB,Homeobox transcription factor family	AT4G36740	(at4g36740 : 125.0) Encodes a homeodomain leucine zipper class I (HD-Zip I) protein.; homeobox protein 40 (HB40); FUNCTIONS IN: DNA binding, sequence-specific DNA binding transcription factor activity; INVOLVED IN: response to auxin stimulus, regulation of transcription, DNA-dependent; LOCATED IN: nucleus; EXPRESSED IN: ovule, fruit, root, flower; CONTAINS InterPro DOMAIN/s: Homeobox, conserved s…	NA	3.83863	11.0959	0.457017	0.267396	0.25279	0.0703877	9.66491	NA	6.89817	4.39141	5.19565	1.3398	5.06671	1.46582	2.81362
Dm_00012926-RA		O-fucosyltransferase family protein	hormone metabolism.auxin.signal transduction, hormone metabolism.auxin.induced-regulated-responsive-activated	AT2G37980	(at2g37980 : 471.0) O-fucosyltransferase family protein; FUNCTIONS IN: molecular_function unknown; INVOLVED IN: biological_process unknown; LOCATED IN: chloroplast; EXPRESSED IN: 13 plant structures; EXPRESSED DURING: L mature pollen stage, M germinated pollen stage, 4 anthesis, petal differentiation and expansion stage; CONTAINS InterPro DOMAIN/s: GDP-fucose protein O-fucosyltransferase (InterPr…	NA	0.189052	5.15394	0.0129451	0.441054	0.0591069	0.12259	0.908087	-2.51273	2.91938	6.39464	3.87987	2.31946	NA	0.809169	2.81684
Dm_00007067-RA	NA	NA	not assigned.unknown	NA	no hits & (original description: transcript offset:0 AED:0.42 eAED:0.42 QI:0|0|0|0.8|0.25|0.2|5|0|187)	NA	0.153088	0.0123486	0.563333	1.01445	0.894888	0.0448977	0.975902	6.27779	4.36676	NA	NA	2.75804	NA	1.56277	2.82819
Dm_00005409-RA		hAT transposon superfamily	DNA.synthesis/chromatin structure.retrotransposon/transposase.hat-like transposase, RNA.regulation of transcription.putative transcription regulator	AT4G15020	(loc_os05g26040.1 : 171.0) no description available & (at4g15020 : 148.0) hAT transposon superfamily; FUNCTIONS IN: protein dimerization activity, DNA binding; INVOLVED IN: biological_process unknown; LOCATED IN: cellular_component unknown; EXPRESSED IN: 19 plant structures; EXPRESSED DURING: 8 growth stages; CONTAINS InterPro DOMAIN/s: HAT dimerisation (InterPro:IPR008906), Zinc finger, BED-type…	NA	0.593807	1.41627	1.73073	2.43552	2.43339	0.559222	9.0962	2.67866	4.02558	2.39411	1.9069	3.87919	1.9036	1.91695	2.82863
Dm_00000065-RA		Ovate family protein	development.unspecified, RNA.regulation of transcription.ovate family OFP	AT2G36026	(at2g36026 : 95.1) Ovate family protein; FUNCTIONS IN: molecular_function unknown; INVOLVED IN: biological_process unknown; LOCATED IN: cellular_component unknown; CONTAINS InterPro DOMAIN/s: Protein of unknown function DUF623 (InterPro:IPR006458); BEST Arabidopsis thaliana protein match is: ovate family protein 6 (TAIR:AT3G52525.1); Has 30201 Blast hits to 17322 proteins in 780 species: Archae -…	NA	1.41851	1.49832	0.290803	0.193926	0.469885	0.459891	2.23541	NA	2.26189	2.97449	2.27086	NA	3.7441	1.56351	2.83735
Dm_00003221-RA		NB-ARC domain-containing disease resistance protein	stress.biotic.PR-proteins	AT3G14470	(loc_os03g38330.1 : 97.8) no description available & (at3g14470 : 82.4) NB-ARC domain-containing disease resistance protein; FUNCTIONS IN: protein binding; INVOLVED IN: apoptosis, defense response; LOCATED IN: endomembrane system; EXPRESSED IN: 23 plant structures; EXPRESSED DURING: 14 growth stages; CONTAINS InterPro DOMAIN/s: Leucine-rich repeat-containing protein (InterPro:IPR015766), NB-ARC (…	NA	0.550662	1.1356	3.36766	3.40033	3.43926	0.34809	12.4251	3.44785	5.20521	1.87294	1.86093	4.46	1.85286	1.90315	2.8389
Dm_00000340-RA	NA	NA	not assigned.unknown	NA	(loc_os06g18860.1 : 94.0) no description available & (reliability: 100.0) & (original description: transcript offset:0 AED:0.39 eAED:0.39 QI:0|-1|0|1|-1|1|1|0|117)	NA	0.660331	1.21516	0.742141	1.06745	0.796998	0.293362	3.4544	1.49498	3.67264	2.25098	2.081	2.34537	1.71343	1.81222	2.84972
Dm_00009562-RA		MUS308 and mammalian DNA polymerase-like protein	DNA.synthesis/chromatin structure	AT4G32700	(at4g32700 : 1082.0) Encodes a homolog of Drosophila MUS308 and mammalian DNA polymerase, which prevent spontaneous or DNA damage-induced production of DNA double strand breaks. Two conserved functional domains: an N-terminal superfamily II DNA/RNA helicase domain and a C-terminal prokaryotic-type DNA polymerase I domain. Required for regulated cell division and differentiation in meristems. Muta…	NA	0.825481	1.87759	2.48745	2.57944	2.16994	0.637019	10.1691	2.43331	4.01329	2.02601	2.22683	3.62469	1.96722	1.93802	2.8612
Dm_00004441-RA		SGNH hydrolase-type esterase superfamily protein	misc.GDSL-motif lipase	AT4G10950	(at4g10950 : 451.0) SGNH hydrolase-type esterase superfamily protein; FUNCTIONS IN: hydrolase activity, acting on ester bonds, carboxylesterase activity; INVOLVED IN: lipid metabolic process; LOCATED IN: cellular_component unknown; EXPRESSED IN: 9 plant structures; EXPRESSED DURING: 4 anthesis, petal differentiation and expansion stage, E expanded cotyledon stage; CONTAINS InterPro DOMAIN/s: Lipa…	NA	0.68683	3.28881	0.10179	0.314588	0.173975	0.149893	0.518385	-2.66022	NA	2.31345	NA	NA	NA	0.789931	2.86728
Dm_00003046-RA	emb1507	U5 small nuclear ribonucleoprotein helicase	DNA.synthesis/chromatin structure	AT1G20960	(at1g20960 : 123.0) embryo defective 1507 (emb1507); FUNCTIONS IN: in 6 functions; INVOLVED IN: embryo development ending in seed dormancy; EXPRESSED IN: 24 plant structures; EXPRESSED DURING: 13 growth stages; CONTAINS InterPro DOMAIN/s: ATPase, AAA+ type, core (InterPro:IPR003593), DNA/RNA helicase, DEAD/DEAH box type, N-terminal (InterPro:IPR011545), Sec63 domain (InterPro:IPR004179), Sec63 do…	NA	0.424875	0.537004	1.32331	0.447169	0.918629	0.293509	3.52183	2.71019	3.574	NA	1.90615	3.05641	2.90652	1.81488	2.87664
Dm_00013474-RA		hAT transposon superfamily protein	DNA.unspecified	AT1G43260	(at1g43260 : 206.0) hAT transposon superfamily protein; CONTAINS InterPro DOMAIN/s: Protein of unknown function DUF659 (InterPro:IPR007021); BEST Arabidopsis thaliana protein match is: hAT transposon superfamily protein (TAIR:AT5G31412.1); Has 599 Blast hits to 592 proteins in 25 species: Archae - 0; Bacteria - 0; Metazoa - 11; Fungi - 2; Plants - 577; Viruses - 0; Other Eukaryotes - 9 (source: N…	NA	0.787908	1.13339	3.29009	0.942038	1.40514	0.268501	7.10603	2.63497	4.65259	1.11229	2.34138	3.20246	2.90768	1.90112	2.88344
Dm_00013226-RA		Glutaredoxin family protein	redox.glutaredoxins	AT2G41330	(at2g41330 : 164.0) Glutaredoxin family protein; FUNCTIONS IN: electron carrier activity, protein disulfide oxidoreductase activity; INVOLVED IN: N-terminal protein myristoylation, cell redox homeostasis; LOCATED IN: chloroplast; EXPRESSED IN: 20 plant structures; EXPRESSED DURING: 11 growth stages; CONTAINS InterPro DOMAIN/s: Thioredoxin fold (InterPro:IPR012335), Glutaredoxin (InterPro:IPR00210…	NA	0.705455	0.970189	1.01267	0.905507	0.74674	0.835796	2.99531	1.62098	1.82639	1.54397	1.98281	2.0679	1.72184	1.82356	2.88416
Dm_00012158-RA	MSH7	MUTS homolog 7	DNA.repair	AT3G24495	(at3g24495 : 163.0) encodes a DNA mismatch repair homolog of human MutS gene, MSH6. There are four MutS genes in Arabidopsis, MSH2, MSH3, MSH6, and MSH7, which all act as heterodimers and bind to 51-mer duplexes. MSH2*MSH7 exhibit moderate affinity for a (T/G) substrate and weak binding of (+T), suggesting MSH2*MSH7 may be specialized for lesions/base mispairs not tested or for (T/G) mispairs in …	NA	1.04907	1.60425	0.367388	0.51714	0.491551	0.343099	1.74749	NA	2.34624	2.25011	1.78498	NA	1.70749	1.55295	2.88544
Dm_00009326-RA	RIC7	ROP-interactive CRIB motif-containing protein 7	protein.postranslational modification	AT4G28560	(at4g28560 : 337.0) encodes a member of a novel protein family that contains contain a CRIB (for Cdc42/Rac-interactive binding) motif required for their specific interaction with GTP-bound Rop1 (plant-specific Rho GTPase). Most similar to RIC6 and RIC8 (subfamily group II). Gene is expressed in all tissues examined.; ROP-interactive CRIB motif-containing protein 7 (RIC7); BEST Arabidopsis thalian…	NA	0.884703	2.36009	0.0338304	0.112651	0.967348	0.0209124	1.67745	NA	6.47365	5.5406	NA	NA	3.86843	1.51226	2.88556
Dm_00014630-RA	NA	NA	not assigned.unknown	NA	no hits & (original description: transcript offset:0 AED:0.21 eAED:0.21 QI:0|0|0|1|1|1|2|0|145)	NA	0.130841	0.482909	1.17778	0.0508628	1.8591	0.0967362	2.05794	2.11419	4.50227	NA	NA	4.09099	5.46371	1.5588	2.89891
Dm_00006535-RA	NA	NA	not assigned.unknown	NA	no hits & (original description: transcript offset:0 AED:0.21 eAED:0.21 QI:0|-1|0|1|-1|1|1|0|106)	NA	25.8343	0.119796	0	1.23676	0.148737	1.48105	14.7361	6.91819	3.35815	9.56975	6.51521	NA	3.63491	1.33187	2.90483
Dm_00015973-RA	NA	NA	not assigned.unknown	NA	(loc_os02g49120.1 : 138.0) no description available & (reliability: 100.0) & (original description: transcript offset:0 AED:0.16 eAED:0.16 QI:0|-1|0|1|-1|1|1|0|203)	NA	0.191296	0.376751	0.995345	0.585096	0.627038	0.153007	1.21746	1.69944	2.99999	NA	NA	2.65352	NA	1.57268	2.927
Dm_00019873-RA	FRS5	FAR1-related sequence 5	signalling.light	AT4G38180	(at4g38180 : 217.0) FAR1-related sequence 5 (FRS5); FUNCTIONS IN: zinc ion binding; INVOLVED IN: response to red or far red light; LOCATED IN: cellular_component unknown; EXPRESSED IN: 22 plant structures; EXPRESSED DURING: 13 growth stages; CONTAINS InterPro DOMAIN/s: MULE transposase, conserved domain (InterPro:IPR018289), Transcription factor, FAR1-related (InterPro:IPR004330), Zinc finger, PM…	NA	0.058533	0.442497	0.558087	1.09661	0.819562	1.39817	0.96211	NA	NA	NA	NA	4.07389	NA	1.57359	2.92804
Dm_00018520-RA	AP4.3A	protein kinase family protein	signalling.receptor kinases.legume-lectin	AT2G32800	(loc_os11g25860.1 : 420.0) no description available & (at2g32800 : 403.0) AP4.3A; FUNCTIONS IN: protein serine/threonine kinase activity, protein kinase activity, ATP binding; INVOLVED IN: protein amino acid phosphorylation; LOCATED IN: plasma membrane; EXPRESSED IN: 19 plant structures; EXPRESSED DURING: 10 growth stages; CONTAINS InterPro DOMAIN/s: Protein kinase, ATP binding site (InterPro:IPR…	NA	0.491809	0.671261	0.37944	0.902953	0.953011	1.69927	1.69669	1.34068	NA	2.12772	0.841106	1.7946	0.914619	1.5491	2.93004
Dm_00009895-RA		Pentatricopeptide repeat (PPR) superfamily protein	not assigned.no ontology.pentatricopeptide (PPR) repeat-containing protein	AT4G13650	(loc_os07g10400.1 : 445.0) no description available & (at4g13650 : 343.0) Pentatricopeptide repeat (PPR) superfamily protein; CONTAINS InterPro DOMAIN/s: Pentatricopeptide repeat (InterPro:IPR002885); BEST Arabidopsis thaliana protein match is: Tetratricopeptide repeat (TPR)-like superfamily protein (TAIR:AT1G16480.1); Has 61118 Blast hits to 14026 proteins in 284 species: Archae - 2; Bacteria - …	NA	0.686705	0.849089	1.27449	1.17743	1.06156	0.555236	3.07926	1.84519	2.43981	1.27089	1.52418	2.12513	1.38028	1.83941	2.93771
Dm_00018964-RA	NAC044	NAC domain containing protein 44	RNA.regulation of transcription.NAC domain transcription factor family, development.unspecified	AT3G01600	(loc_os02g38130.1 : 295.0) no description available & (at3g01600 : 261.0) NAC domain containing protein 44 (NAC044); FUNCTIONS IN: sequence-specific DNA binding transcription factor activity; INVOLVED IN: multicellular organismal development, regulation of transcription; CONTAINS InterPro DOMAIN/s: No apical meristem (NAM) protein (InterPro:IPR003441); BEST Arabidopsis thaliana protein match is: …	NA	3.80925	1.2962	0.865905	0.215109	0.230964	0.158616	2.05747	NA	3.66436	NA	3.1195	NA	3.22903	1.74944	2.93922
Dm_00011263-RA	EMB2773	PHD finger family protein	development.unspecified	AT5G15540	(at5g15540 : 110.0) Encodes Adherin SCC2. Essential for viability. Required for normal seed development. Plays a role in the establishment of sister-chromatid cohesion and chromosome organization during meiosis.; EMBRYO DEFECTIVE 2773 (EMB2773); FUNCTIONS IN: binding, zinc ion binding; INVOLVED IN: centromere complex assembly, sister chromatid cohesion, embryo development ending in seed dormancy,…	NA	0.687407	1.84244	4.03058	4.28358	3.44442	0.833142	13.9338	2.91328	4.07857	1.7986	2.03751	4.27622	1.70396	1.95689	2.93955
Dm_00020644-RA		DNAse I-like superfamily protein	not assigned.unknown	AT1G43760	(loc_os08g34420.1 : 94.4) no description available & (at1g43760 : 90.9) DNAse I-like superfamily protein; CONTAINS InterPro DOMAIN/s: Endonuclease/exonuclease/phosphatase (InterPro:IPR005135), RNA-directed DNA polymerase (reverse transcriptase), related (InterPro:IPR015706); BEST Arabidopsis thaliana protein match is: DNAse I-like superfamily protein (TAIR:AT1G40390.1); Has 1816 Blast hits to 174…	NA	0	0	0.742474	1.65259	1.81778	0.17723	1.57204	8.47607	3.14489	NA	NA	7.43985	NA	1.5746	2.94163
Dm_00003460-RA	PEN3	ABC-2 and Plant PDR ABC-type transporter family protein	transport.ABC transporters and multidrug resistance systems	AT1G59870	(at1g59870 : 1776.0) ATP binding cassette transporter. Localized to the plasma membrane in uninfected cells. In infected leaves, the protein concentrated at infection sites. Contributes to nonhost resistance to inappropriate pathogens that enter by direct penetration in a salicylic acidÃ±dependent manner. Required for mlo resistance. Has Cd transporter activity (Cd2+ extrusion pump) and contribut…	Plant permeome.primary active transport.ABC superfamily.ABC-G group.PDR subfamily G transporter.	11.7893	7.67	19.807	139.763	40.0419	445.216	533.64	6.12041	NA	4.75154	3.73623	5.49961	1.93286	1.78602	2.95263
Dm_00009859-RA		P-loop containing nucleoside triphosphate hydrolases superfamily protein	cell.organisation	AT1G73860	(at1g73860 : 816.0) P-loop containing nucleoside triphosphate hydrolases superfamily protein; FUNCTIONS IN: microtubule motor activity, ATP binding; INVOLVED IN: microtubule-based movement; LOCATED IN: chloroplast; EXPRESSED IN: petal, sepal, male gametophyte, flower, pollen tube; EXPRESSED DURING: L mature pollen stage, M germinated pollen stage, 4 anthesis, petal differentiation and expansion s…	NA	1.40407	1.44619	0.84632	0.519953	0.582648	0.464879	1.77708	NA	1.9402	1.03096	1.58399	NA	1.76394	1.57671	2.95738
Dm_00015374-RA	NA	NA	not assigned.unknown	NA	(loc_os10g08970.1 : 191.0) no description available & (p08770|tra1_maize : 110.0) Putative AC transposase (ORFA) - Zea mays (Maize) & (reliability: 100.0) & (original description: transcript offset:0 AED:0.12 eAED:0.12 QI:0|0|0|0.66|0.4|0.16|6|0|351)	NA	0.0126299	0.549677	0.301215	3.31229	3.08786	1.43601	6.45714	3.55479	2.1588	4.39202	1.06679	8.88067	0.963874	1.81737	2.96374
Dm_00012489-RA	NA	NA	not assigned.unknown	NA	no hits & (original description: transcript offset:0 AED:0.34 eAED:0.37 QI:0|0|0|1|0|0|3|0|137)	NA	0.55293	0.763646	1.87953	1.99501	1.87687	0.137691	6.81796	3.14991	5.70244	1.82888	1.85513	3.6846	1.76062	1.97265	2.96563
Dm_00010913-RA	ABCB15	ABC transporter family protein	transport.ABC transporters and multidrug resistance systems	AT3G28345	(at3g28345 : 123.0) ABC transporter family protein; FUNCTIONS IN: ATPase activity, coupled to transmembrane movement of substances; INVOLVED IN: transport, transmembrane transport; LOCATED IN: plasma membrane; EXPRESSED IN: shoot apex, inflorescence meristem, cotyledon, hypocotyl, flower; EXPRESSED DURING: petal differentiation and expansion stage; CONTAINS InterPro DOMAIN/s: ATPase, AAA+ type, c…	NA	5.08492	1.13129	0.586085	0.372801	0.537378	0.676534	3.06184	NA	2.16251	2.41312	2.52876	NA	2.82203	1.37349	2.97291
Dm_00009338-RA	NA	NA	PS.lightreaction.photosystem I.PSI polypeptide subunits	NA	(q7yjx3|psab_calfe : 630.0) Photosystem I P700 chlorophyll a apoprotein A2 (PsaB) (PSI-B) - Calycanthus fertilis var. ferax (Calycanthus floridus var. glaucus) & (atcg00340 : 621.0) Encodes the D1 subunit of photosystem I and II reaction centers.; PSAB; FUNCTIONS IN: chlorophyll binding; INVOLVED IN: photosynthesis, light harvesting in photosystem II, photosynthesis, light harvesting in photosyst…	NA	12.4091	11.8392	7.71178	51.1069	42.0908	5.70261	140.106	3.56501	4.61913	4.18544	NA	3.49675	NA	2.02768	2.97927
Dm_00003711-RA		Peptidase S24/S26A/S26B/S26C family protein	protein.targeting.secretory pathway.unspecified	AT1G52600	(at1g52600 : 98.2) Peptidase S24/S26A/S26B/S26C family protein; FUNCTIONS IN: peptidase activity; INVOLVED IN: proteolysis, signal peptide processing; LOCATED IN: endoplasmic reticulum, plasma membrane, membrane; EXPRESSED IN: 26 plant structures; EXPRESSED DURING: 14 growth stages; CONTAINS InterPro DOMAIN/s: Peptidase S24/S26A/S26B, conserved region (InterPro:IPR019759), Peptidase S26B, eukaryo…	NA	7.1931	0.474476	0.412541	0.164356	0.368611	0.356382	1.93161	1.98964	2.48832	2.15105	2.31908	-1.91237	3.46314	0.7447	2.98468
Dm_00002981-RA	AT-P4H-1	P4H isoform 1	misc.oxidases - copper, flavone etc	AT2G43080	(at2g43080 : 162.0) Encodes a prolyl-4 hydroxylase that can hydroxylate poly(L-proline),the collagen model peptide (Pro-Pro-Gly)10 and other proline rich peptides.; P4H isoform 1 (AT-P4H-1); FUNCTIONS IN: oxidoreductase activity, acting on paired donors, with incorporation or reduction of molecular oxygen, 2-oxoglutarate as one donor, and incorporation of one atom each of oxygen into both donors,…	NA	1.14472	2.64184	0.542208	0.675117	0.761283	0.77132	4.23185	NA	2.37719	2.94544	2.46803	1.91722	2.62864	1.8222	2.98858
Dm_00008931-RA	CRK8	cysteine-rich RECEPTOR-like kinase	signalling.receptor kinases.DUF 26	AT4G23160	(at4g23160 : 519.0) Encodes a cysteine-rich receptor-like protein kinase.; cysteine-rich RLK (RECEPTOR-like protein kinase) 8 (CRK8); FUNCTIONS IN: kinase activity; INVOLVED IN: protein amino acid phosphorylation; CONTAINS InterPro DOMAIN/s: Protein kinase, ATP binding site (InterPro:IPR017441), Reverse transcriptase, RNA-dependent DNA polymerase (InterPro:IPR013103), Serine/threonine-protein kin…	NA	0.463093	0.85295	1.85411	0.812807	1.46686	0.228367	1.99038	1.22527	3.13288	NA	NA	2.069	1.29862	1.57336	2.98939
Dm_00012191-RA		pentatricopeptide (PPR) repeat-containing protein	not assigned.no ontology.pentatricopeptide (PPR) repeat-containing protein	AT1G68930	(loc_os02g01610.2 : 895.0) no description available & (at1g68930 : 894.0) pentatricopeptide (PPR) repeat-containing protein; CONTAINS InterPro DOMAIN/s: Pentatricopeptide repeat (InterPro:IPR002885); BEST Arabidopsis thaliana protein match is: pentatricopeptide (PPR) repeat-containing protein (TAIR:AT2G22070.1); Has 47331 Blast hits to 14466 proteins in 272 species: Archae - 2; Bacteria - 18; Met…	NA	0.668472	3.58947	4.30754	3.36857	2.43256	0.789045	13.6234	1.92103	4.11263	1.66845	2.48023	4.32079	2.0188	1.9885	2.99245
Dm_00015039-RA		Cupredoxin superfamily protein	redox.ascorbate and glutathione.ascorbate	AT4G39830	(at4g39830 : 813.0) Cupredoxin superfamily protein; FUNCTIONS IN: oxidoreductase activity, L-ascorbate oxidase activity, copper ion binding; INVOLVED IN: oxidation reduction; LOCATED IN: endomembrane system, extracellular region; EXPRESSED IN: 19 plant structures; EXPRESSED DURING: 12 growth stages; CONTAINS InterPro DOMAIN/s: Multicopper oxidase, type 3 (InterPro:IPR011707), Multicopper oxidase,…	NA	2.76286	0.0947607	1.04582	0.54411	0.876278	0.375433	3.75143	5.34019	3.34371	1.84604	2.10018	NA	2.78278	1.79168	2.99476
Dm_00007733-RA		HCO3- transporter family	transport.unspecified anions	AT4G32510	(at4g32510 : 811.0) HCO3- transporter family; FUNCTIONS IN: anion exchanger activity; INVOLVED IN: anion transport; LOCATED IN: integral to membrane, membrane; CONTAINS InterPro DOMAIN/s: Bicarbonate transporter, C-terminal (InterPro:IPR011531), Bicarbonate transporter, eukaryotic (InterPro:IPR003020); BEST Arabidopsis thaliana protein match is: HCO3- transporter family (TAIR:AT5G25430.1); Has 23…	Plant permeome.carrier-mediated transport.AE family.BOR borate transporter..	1.54521	1.15137	0.808285	0.589653	0.549711	0.519835	1.57858	NA	1.62538	0.93048	1.53814	NA	1.39859	1.57111	3.00846
Dm_00010153-RA		Tetratricopeptide repeat (TPR)-like superfamily protein	not assigned.no ontology.pentatricopeptide (PPR) repeat-containing protein	AT4G37380	(at4g37380 : 80.5) Tetratricopeptide repeat (TPR)-like superfamily protein; CONTAINS InterPro DOMAIN/s: Pentatricopeptide repeat (InterPro:IPR002885); BEST Arabidopsis thaliana protein match is: Tetratricopeptide repeat (TPR)-like superfamily protein (TAIR:AT5G66520.1); Has 33786 Blast hits to 13504 proteins in 252 species: Archae - 0; Bacteria - 14; Metazoa - 55; Fungi - 76; Plants - 33202; Viru…	NA	0.598382	0.278404	0.68861	0.458247	0.67674	0.243161	0.932309	NA	NA	NA	NA	NA	NA	1.5799	3.00904
Dm_00013934-RA	NA	NA	not assigned.unknown	NA	no hits & (original description: transcript offset:0 AED:0.42 eAED:0.42 QI:0|0|0|0.16|1|1|6|0|340)	NA	2.99388	1.27283	0.411686	0.0290689	0.655974	0.584039	2.30448	0.866749	2.01173	2.46888	1.81411	NA	6.26966	1.50557	3.01728
Dm_00018021-RA	NA	NA	not assigned.unknown	NA	no hits & (original description: transcript offset:0 AED:0.18 eAED:0.18 QI:0|-1|0|1|-1|1|1|0|61)	NA	0.60173	0.495413	0.629948	0.876404	1.25939	0.266629	2.38181	NA	NA	NA	NA	NA	NA	1.8652	3.03163
Dm_00005248-RA	NA	NA	not assigned.unknown	NA	no hits & (original description: transcript offset:0 AED:0.73 eAED:0.73 QI:0|0|0|0.5|1|0.5|2|0|56)	NA	1.64541	0.868421	2.4272	3.08608	1.96618	1.35726	14.2744	4.04625	3.46036	2.52839	2.85496	3.15469	2.22232	2.15233	3.03762
Dm_00002803-RA	NA	NA	not assigned.unknown	NA	no hits & (original description: transcript offset:0 AED:0.97 eAED:0.97 QI:0|0|0|0.16|1|1|6|0|352)	NA	2.07161	1.4864	1.715	0.637395	1.3806	0.565696	6.34589	2.08951	3.48187	1.8721	2.20869	1.60907	3.32201	2.01411	3.04867
Dm_00017104-RA	MYB4	myb domain protein 4	RNA.regulation of transcription.MYB domain transcription factor family	AT4G38620	(at4g38620 : 263.0) Encodes a R2R3 MYB protein which is involved in the response to UV-B. It functions as a repressor of target gene expression. One of its target genes encodes cinnamate 4-hydroxylase; mutants accumulate sinapate esters in their leaves. MYB4 binds to its own promoter and represses its own expression. Nuclear localization of MYB4 depends on the action of the beta importin SAD2.; m…	NA	1.42189	1.26814	0.285009	0.356819	0.453243	0.212898	1.50995	NA	2.71879	2.51331	1.73542	NA	1.97894	1.58125	3.05713
Dm_00004001-RA		thyroid adenoma-associated-like protein	not assigned.unknown	AT3G55160	(at3g55160 : 107.0) unknown protein; EXPRESSED IN: 11 plant structures; EXPRESSED DURING: 4 anthesis, F mature embryo stage, petal differentiation and expansion stage, E expanded cotyledon stage, D bilateral stage; CONTAINS InterPro DOMAIN/s: Protein of unknown function DUF2428, death-receptor-like (InterPro:IPR019442); Has 357 Blast hits to 330 proteins in 163 species: Archae - 0; Bacteria - 0; …	NA	0.749604	1.388	0.904784	1.38533	1.37035	0.468545	3.81775	NA	3.01661	2.06427	NA	2.31406	NA	1.87256	3.05721
Dm_00006132-RA		hAT dimerization domain-containing protein / transposase-like protein	DNA.synthesis/chromatin structure.retrotransposon/transposase.hat-like transposase	AT5G33406	(loc_os12g35120.1 : 188.0) no description available & (at5g33406 : 184.0) hAT dimerisation domain-containing protein / transposase-related; FUNCTIONS IN: protein dimerization activity; INVOLVED IN: biological_process unknown; LOCATED IN: mitochondrion; CONTAINS InterPro DOMAIN/s: HAT dimerisation (InterPro:IPR008906); BEST Arabidopsis thaliana protein match is: hAT transposon superfamily (TAIR:AT…	NA	1.01996	1.64691	4.05413	1.18353	1.81393	0.394676	10.0033	2.59041	4.70312	1.29507	2.46913	3.26281	3.07483	2.0662	3.05925
Dm_00003979-RA		pentatricopeptide (PPR) repeat-containing protein	not assigned.no ontology.pentatricopeptide (PPR) repeat-containing protein	AT2G22070	(at2g22070 : 99.0) pentatricopeptide (PPR) repeat-containing protein; CONTAINS InterPro DOMAIN/s: Pentatricopeptide repeat (InterPro:IPR002885); BEST Arabidopsis thaliana protein match is: Pentatricopeptide repeat (PPR) superfamily protein (TAIR:AT1G25360.1); Has 47939 Blast hits to 14346 proteins in 287 species: Archae - 0; Bacteria - 20; Metazoa - 98; Fungi - 122; Plants - 46979; Viruses - 0; O…	NA	0.964247	2.91816	3.38175	3.53574	2.67004	1.39946	17.6223	2.59138	3.67428	2.39927	2.70969	4.16403	2.31288	2.16013	3.06412
Dm_00017028-RA	AAE5	acyl activating enzyme 5	lipid metabolism.FA synthesis and FA elongation.acyl coa ligase	AT5G16370	(at5g16370 : 691.0) acyl activating enzyme 5 (AAE5); FUNCTIONS IN: catalytic activity; INVOLVED IN: metabolic process; LOCATED IN: peroxisome; EXPRESSED IN: leaf; CONTAINS InterPro DOMAIN/s: AMP-binding, conserved site (InterPro:IPR020845), AMP-dependent synthetase/ligase (InterPro:IPR000873); BEST Arabidopsis thaliana protein match is: AMP-dependent synthetase and ligase family protein (TAIR:AT5…	NA	1.23315	1.35363	1.50905	4.50546	3.61781	2.27717	16.0887	3.56536	2.81669	3.43978	2.14584	3.69342	1.83199	2.13787	3.06465
Dm_00009464-RA		glycosyl hydrolase family 81 protein	stress.biotic	AT5G15870	(loc_os09g21210.1 : 530.0) no description available & (at5g15870 : 512.0) glycosyl hydrolase family 81 protein; FUNCTIONS IN: hydrolase activity, acting on glycosyl bonds, endo-1,3(4)-beta-glucanase activity; INVOLVED IN: response to cyclopentenone; EXPRESSED IN: 23 plant structures; EXPRESSED DURING: 13 growth stages; CONTAINS InterPro DOMAIN/s: Glycoside hydrolase, family 81 (InterPro:IPR005200…	NA	0.864298	0.605769	0.42538	1.24709	0.564637	2.28216	1.88217	1.62636	NA	2.10695	1.76067	1.14228	NA	1.54322	3.06683
Dm_00007759-RA	NA	NA	not assigned.unknown	NA	no hits & (original description: transcript offset:0 AED:0.69 eAED:0.69 QI:0|0|0|0.5|0|0|2|0|123)	NA	0.111127	0.500069	0.46614	0.877646	0.946256	0.362188	0.920702	NA	NA	NA	NA	NA	NA	1.57891	3.06739
Dm_00006356-RA	NA	NA	not assigned.unknown	NA	no hits & (original description: transcript offset:0 AED:0.04 eAED:0.04 QI:0|-1|0|1|-1|1|1|0|107)	NA	1.01815	0.118676	0.369335	0.388136	0.392926	3.09951	1.63586	3.7889	NA	2.41499	2.12942	NA	NA	1.48429	3.08014
Dm_00006187-RA	HAK5	high affinity K transporter 5	transport.potassium	AT4G13420	(at4g13420 : 828.0) Encodes a protein of the KUP/HAK/KT potassium channel class that is upregulated in the roots by K levels.; high affinity K+ transporter 5 (HAK5); FUNCTIONS IN: potassium ion transmembrane transporter activity, potassium:sodium symporter activity; INVOLVED IN: potassium ion transport; LOCATED IN: membrane; EXPRESSED IN: 15 plant structures; EXPRESSED DURING: 8 growth stages; CO…	Plant permeome.carrier-mediated transport.KUP family.HAK/KUP/KT potassium cation transporter..	0.345997	0.624402	0.821144	1.40343	0.947355	9.22416	4.19123	2.74268	-1.13472	2.36978	2.14477	3.58692	1.58668	1.26308	3.08507
Dm_00002025-RA	NA	NA	not assigned.unknown	NA	no hits & (original description: transcript offset:0 AED:0.57 eAED:0.57 QI:0|0|0|0.5|1|1|2|0|169)	NA	1.51385	0.866665	0.241369	0.262985	0.272284	0.853824	0.558182	NA	NA	NA	NA	NA	NA	1.56796	3.08642
Dm_00009410-RA	NRPD1A	nuclear RNA polymerase D1A	RNA.transcription	AT1G63020	(at1g63020 : 113.0) Encodes one of two alternative largest subunits of a putative plant-specific RNA polymerase IV (aka RNA polymerase D). Required for posttranscriptional gene silencing.; nuclear RNA polymerase D1A (NRPD1A); FUNCTIONS IN: DNA-directed RNA polymerase activity, DNA binding; INVOLVED IN: in 7 processes; LOCATED IN: nucleus, DNA-directed RNA polymerase IV complex; EXPRESSED IN: 9 pl…	NA	1.57427	3.43045	1.22158	3.5146	2.55509	1.48313	16.2324	2.23895	3.43247	3.60241	2.66526	3.32282	2.21124	2.17415	3.09197
Dm_00000921-RA		Helicase/SANT-associated, DNA binding protein	RNA.regulation of transcription.putative transcription regulator	AT3G24880	(at3g24880 : 278.0) Helicase/SANT-associated, DNA binding protein; FUNCTIONS IN: DNA binding; EXPRESSED IN: cultured cell; CONTAINS InterPro DOMAIN/s: SANT, DNA-binding (InterPro:IPR001005), HSA (InterPro:IPR006562), Homeodomain-like (InterPro:IPR009057), HAS subgroup (InterPro:IPR013999), Helicase/SANT-associated, DNA binding (InterPro:IPR014012), MYB-like (InterPro:IPR017877); BEST Arabidopsis …	NA	0.761367	1.99004	4.311	3.58712	3.91467	0.678854	12.4872	2.64407	4.20491	1.53601	1.6723	4.04353	1.79246	2.02096	3.09502
Dm_00016597-RA	NAC042	NAC domain containing protein 42	RNA.regulation of transcription.NAC domain transcription factor family, development.unspecified	AT2G43000	(loc_os03g56580.1 : 233.0) no description available & (at2g43000 : 224.0) NAC domain containing protein 42 (NAC042); FUNCTIONS IN: sequence-specific DNA binding transcription factor activity; INVOLVED IN: multicellular organismal development, regulation of transcription; LOCATED IN: cellular_component unknown; EXPRESSED IN: 9 plant structures; EXPRESSED DURING: 6 growth stages; CONTAINS InterPro …	NA	0.0121109	0.131353	1.26702	2.54096	4.89988	7.60271	13.5674	6.69133	NA	3.39322	1.46358	10.0058	2.41347	1.95475	3.10031
Dm_00015395-RA	IRE	AGC (cAMP-dependent, cGMP-dependent and protein kinase C) kinase family protein	development.unspecified	AT5G62310	(at5g62310 : 1312.0) Encodes a protein with a serine/threonine kinase domain. There are two other closely related members in Arabidopsis. Knock-out mutation results in incomplete root hair elongation. Expression is found all organs examined but is especially strong in elongating root hairs.; INCOMPLETE ROOT HAIR ELONGATION (IRE); CONTAINS InterPro DOMAIN/s: Protein kinase, catalytic domain (Inter…	NA	2.98862	1.49086	0.562784	0.748501	0.847843	0.961974	3.85818	1.36693	1.99273	2.77532	2.17552	NA	2.3591	1.82368	3.10194
Dm_00019932-RA	NA	NA	not assigned.unknown	NA	no hits & (original description: transcript offset:0 AED:0.27 eAED:0.27 QI:0|0|0|1|1|1|3|0|342)	NA	2.0852	1.36042	0	0	0	0	0.602348	NA	NA	NA	NA	NA	NA	1.5635	3.10292
Dm_00008837-RA		proline-rich receptor-like kinase	not assigned.unknown	AT3G26350	(at3g26350 : 167.0) LOCATED IN: chloroplast; EXPRESSED IN: root, pedicel, carpel, stamen; EXPRESSED DURING: 4 anthesis, petal differentiation and expansion stage; CONTAINS InterPro DOMAIN/s: Late embryogenesis abundant protein, group 2 (InterPro:IPR004864); BEST Arabidopsis thaliana protein match is: unknown protein (TAIR:AT1G13050.1); Has 3534 Blast hits to 2704 proteins in 342 species: Archae -…	NA	0.834275	1.10641	0.431671	0.342512	0.371605	0.409349	0.837939	NA	NA	NA	NA	NA	NA	1.58326	3.10319
Dm_00008003-RA		Survival protein SurE-like phosphatase/nucleotidase	misc.acid and other phosphatases	AT1G72880	(at1g72880 : 135.0) Survival protein SurE-like phosphatase/nucleotidase; FUNCTIONS IN: hydrolase activity, acid phosphatase activity; INVOLVED IN: biological_process unknown; LOCATED IN: cellular_component unknown; CONTAINS InterPro DOMAIN/s: Survival protein SurE-like phosphatase/nucleotidase (InterPro:IPR002828); BEST Arabidopsis thaliana protein match is: Survival protein SurE-like phosphatase…	NA	1.68606	0.790898	1.61929	2.62924	1.9124	0.841412	9.04339	3.50034	3.4475	2.47765	2.2523	2.41714	1.74707	2.11791	3.10328
Dm_00019666-RA	NA	NA	not assigned.unknown	NA	no hits & (original description: transcript offset:0 AED:0.09 eAED:0.09 QI:0|-1|0|1|-1|1|1|0|128)	NA	0.793865	2.12111	4.7328	2.12368	2.89849	0.172075	12.4286	2.53802	6.16067	1.38313	2.08132	3.87313	2.51115	2.10391	3.1329
Dm_00002974-RA	NA	NA	not assigned.unknown	NA	(loc_os08g19870.1 : 129.0) no description available & (chl4|521685 : 103.0) no description available & (reliability: 100.0) & (original description: transcript offset:0 AED:0.13 eAED:0.16 QI:0|0|0|0.66|0.5|0.33|3|0|234)	NA	0.705367	0.658469	1.73468	1.61728	0.937831	0.531438	3.60343	2.45584	2.82471	NA	1.98204	2.34179	NA	1.89595	3.13564
Dm_00015315-RA	NA	NA	not assigned.unknown	NA	no hits & (original description: transcript offset:0 AED:0.76 eAED:0.76 QI:0|0|0|0.33|0|0.33|3|0|104)	NA	0.395005	0.37463	0.708149	1.10873	0.664969	1.38746	2.15403	2.51682	NA	NA	NA	NA	NA	1.89629	3.14047
Dm_00016402-RA		Ovate family protein	development.unspecified, RNA.regulation of transcription.ovate family OFP	AT2G36026	(at2g36026 : 85.1) Ovate family protein; FUNCTIONS IN: molecular_function unknown; INVOLVED IN: biological_process unknown; LOCATED IN: cellular_component unknown; CONTAINS InterPro DOMAIN/s: Protein of unknown function DUF623 (InterPro:IPR006458); BEST Arabidopsis thaliana protein match is: ovate family protein 6 (TAIR:AT3G52525.1); Has 30201 Blast hits to 17322 proteins in 780 species: Archae -…	NA	0.225344	1.26484	0.290253	2.00773	0.558038	2.27023	3.95451	1.64948	NA	3.688	2.83682	4.03216	0.969468	1.88116	3.14518
Dm_00010214-RA	NA	NA	not assigned.unknown	NA	(loc_os11g45530.1 : 107.0) no description available & (reliability: 100.0) & (original description: transcript offset:0 AED:0.30 eAED:0.34 QI:0|0|0|1|0|0|2|0|123)	NA	0.390299	1.82314	0	0.795215	0.0927449	0.382587	0.862151	NA	NA	5.72775	3.24937	NA	NA	1.56333	3.14686
Dm_00011121-RA	NA	NA	not assigned.unknown	NA	no hits & (original description: transcript offset:0 AED:0.67 eAED:0.67 QI:0|0|0|0.5|1|1|2|0|61)	NA	0.296543	1.49329	1.43854	1.95999	0.9078	0.631496	7.63772	2.34208	3.67825	2.50131	3.11622	4.71081	1.9217	2.14846	3.15014
Dm_00016543-RA	NA	NA	PS.lightreaction.photosystem I.PSI polypeptide subunits	NA	(q6enw4|psab_sacof : 359.0) Photosystem I P700 chlorophyll a apoprotein A2 (PsaB) (PSI-B) - Saccharum officinarum (Sugarcane) & (atcg00340 : 357.0) Encodes the D1 subunit of photosystem I and II reaction centers.; PSAB; FUNCTIONS IN: chlorophyll binding; INVOLVED IN: photosynthesis, light harvesting in photosystem II, photosynthesis, light harvesting in photosystem I; LOCATED IN: in 7 components;…	NA	3.50528	3.19716	2.13009	15.2562	11.9414	2.01812	35.4617	3.47199	4.14556	4.06995	NA	3.33814	NA	2.10059	3.15227
Dm_00012799-RA	NA	NA	not assigned.unknown	NA	no hits & (original description: transcript offset:7 AED:0.32 eAED:0.35 QI:7|0|0|0.5|0.33|0.5|4|0|185)	NA	2.30035	0.695628	1.63763	0.654536	0.575443	0.835594	1.54534	NA	NA	NA	NA	NA	NA	1.57128	3.15643
Dm_00015255-RA	DAYSLEEPER	BED zinc finger and hAT dimerization domain-containing protein DAYSLEEPER	DNA.unspecified	AT3G42170	(loc_os07g28760.1 : 211.0) no description available & (p08770|tra1_maize : 164.0) Putative AC transposase (ORFA) - Zea mays (Maize) & (at3g42170 : 128.0) transposase-like gene with conserved domains from the family of hAT transposases that includes hobo from Drosophila melanogaster, Activator (Ac) from maize, and Tam3 from snapdragon but lacks several amino acids known to be essential for Ac tran…	NA	0.539297	0.405869	1.34936	1.09546	1.03008	0.42804	2.84456	2.8131	2.73205	1.10057	1.48056	2.37877	1.34637	1.90056	3.15688
Dm_00020120-RA	MYB114	myb domain protein 114	RNA.regulation of transcription.MYB domain transcription factor family, secondary metabolism.flavonoids.anthocyanins	AT1G66380	(at1g66380 : 136.0) Encodes a member of the MYB family of transcription factors. Involved in regulation of anthocyanin biosynthesis. Affects the expression of enzymes involved in later steps of anthocyanin biosynthesis; myb domain protein 114 (MYB114); CONTAINS InterPro DOMAIN/s: SANT, DNA-binding (InterPro:IPR001005), Homeodomain-like (InterPro:IPR009057), Myb, DNA-binding (InterPro:IPR014778), …	NA	0.467876	0.807363	2.65805	35.1914	13.6298	158.712	115.59	7.19382	-0.459325	5.38601	3.08721	7.87877	1.71017	1.65767	3.15738
Dm_00008236-RA	MKS1	MAP kinase substrate 1	stress.biotic.signalling	AT3G18690	(at3g18690 : 90.5) Encodes a nuclear-localized member of a plant specific gene family involved in mediating responses to pathogens. Interacts with WRKY transcriptional regulators.; MAP kinase substrate 1 (MKS1); CONTAINS InterPro DOMAIN/s: VQ (InterPro:IPR008889); BEST Arabidopsis thaliana protein match is: VQ motif-containing protein (TAIR:AT1G21326.1); Has 153 Blast hits to 153 proteins in 16 s…	NA	0.893853	3.50146	0.319332	0.460092	0.427541	0.717648	1.10961	-1.68372	NA	1.77886	NA	NA	NA	1.42943	3.1622
Dm_00003878-RA	TCP12	TCP domain protein 12	RNA.regulation of transcription.TCP transcription factor family	AT1G68800	(at1g68800 : 109.0) Encodes a TCP transcription factor, closely related to teosinte branched1, arrests axillary bud development and prevents axillary bud outgrowth. Transcription level and mutant phenotype are weaker than its homolog BRC1 (At3G18550).; TCP domain protein 12 (TCP12); CONTAINS InterPro DOMAIN/s: Transcription factor, TCP (InterPro:IPR005333), CYC/TB1, R domain (InterPro:IPR017888),…	NA	0.428921	0.609887	0.200318	2.06094	5.14324	1.06128	5.16265	3.07666	2.28635	4.7262	NA	3.57948	1.3017	1.77581	3.16346
Dm_00020295-RA		Copia-like polyprotein/retrotransposon	not assigned.unknown	AT1G21280	(at1g21280 : 82.4) CONTAINS InterPro DOMAIN/s: Retrotransposon gag protein (InterPro:IPR005162); Has 707 Blast hits to 705 proteins in 25 species: Archae - 0; Bacteria - 0; Metazoa - 4; Fungi - 0; Plants - 703; Viruses - 0; Other Eukaryotes - 0 (source: NCBI BLink). & (reliability: 164.8) & (original description: transcript offset:0 AED:0.22 eAED:0.22 QI:0|-1|0|1|-1|1|1|0|222)	NA	0.0159352	0.00861117	0.0217501	0	0.999769	1.62446	1.53225	7.17083	NA	6.39743	NA	6.13458	7.43275	1.58294	3.1637
[truncated: 20,315 more rows]

## Sheet: Header_INFO
	genes marked in red are bona fide trigger hair specific genes passing the following filters: log2FC trigger hair vs root > 1, log2FC trigger hair vs flower > 1, log2FC trigger hair vs petiole > 1, log2FC trigger hair vs trap > 1, log2FC trigger hair vs rim > 1, log2FC trigger hair vs glands > 1, differential expression analysis for each of the pairwise comaprisons BH p-adj < 0.001, FPKM Hair Expr…
Column name	Explanation
DmID	Dionaea muscipula gene identifier (from the reference genome)
[truncated: 22 more rows]
